# Supplementary material for: Visible light-mediated hydrogen atom transfer and proton transfer for the conversion of (2-vinylaryl)methanol derivatives to aryl aldehydes or aryl ketones
Source: Royal Society of Chemistry journal article supplement (doi:10.1039/d3qo01266b), 2023-01-01
Supplement: d3qo01266b1.pdf [file d3qo01266b1.pdf]

# Supporting Information

## Visible Light-mediated Hydrogen Atom Transfer and Proton Transfer for the Conversion of (2-Vinylaryl)methanol Derivatives to Arylaldehydes or Aryl Ketones

Jun Yan<sup>[a]</sup>, Ziqi Yu<sup>[a]</sup>, Hao-Zhao Wei<sup>[a]</sup>, Min Shi<sup>\*[a,b]</sup> and Yin Wei<sup>\*[b]</sup>

<sup>a</sup>Key Laboratory for Advanced Materials & Institute of Fine Chemicals, School of Chemistry & Molecular Engineering, East China University of Science and Technology, 130 Meilong Road, Shanghai 200237, P. R. China, <sup>b</sup>State Key Laboratory of Organometallic Chemistry, Center for Excellence in Molecular Synthesis, University of Chinese Academy of Sciences, Shanghai Institute of Organic Chemistry, Chinese Academy of Sciences, 345 Lingling Road, Shanghai 200032, P. R. China. [mshi@mail.sioc.ac.cn](mailto:mshi@mail.sioc.ac.cn), [weiyin@sioc.ac.cn](mailto:weiyin@sioc.ac.cn)

### Table of Contents

|                                                                      |     |
|----------------------------------------------------------------------|-----|
| 1. General remarks .....                                             | 2   |
| 2. General procedures for the synthesis of substrates <b>1</b> ..... | 4   |
| 3. General procedure for the synthesis of <b>2</b> .....             | 13  |
| 4. Mechanistic Investigations .....                                  | 14  |
| 5. Transformation of the products .....                              | 20  |
| 6. Spectroscopic data of substrates <b>1</b> .....                   | 22  |
| 7. Spectroscopic data of products.....                               | 92  |
| 8. Computational details.....                                        | 175 |
| 9. References .....                                                  | 205 |

## 1. General remarks

$^1\text{H}$ ,  $^{13}\text{C}$  and  $^{19}\text{F}$  NMR spectra were recorded at 400 MHz, 100 MHz and 376 MHz, respectively. HRMS spectra were recorded by EI, ESI, FI method. Infrared spectra were recorded on a Perkin-Elmer PE-983 spectrometer with absorption in  $\text{cm}^{-1}$ . Mass spectra were recorded by EI, ESI, and HRMS was measured on an Agilent Technologies 6224 TOF LC/MS instrument and a Waters Micromass GCT Permier. Melting points were determined on a digital melting point apparatus and temperatures were uncorrected. The employed solvents were dried up by standard methods when necessary. Commercially obtained reagents were used without further purification. All reactions were monitored by TLC plate analysis with silica gel coated plates (Huanghai GF254). Flash column chromatography was performed by using 300-400 mesh silica gel eluting with ethyl acetate and petroleum ether at increased pressure.

## Reaction setup

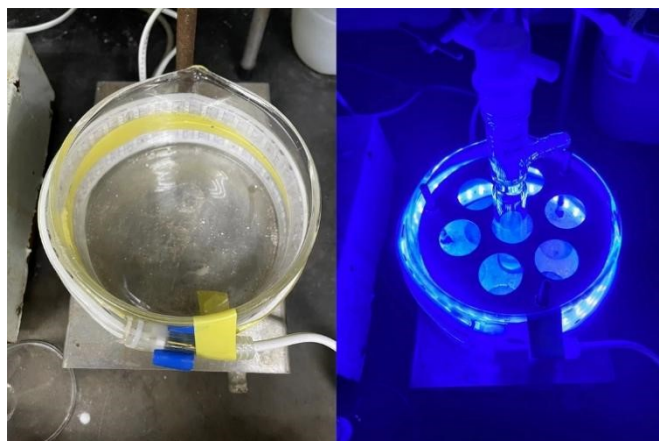

**Figure S1.** 5 W LEDs strip and reaction setup

As depicted in the picture, reactions were carried out in oven-dried sealed tubes. The reaction temperature was maintained at room temperature by a water bath and a fan.

## 2. General procedures for the synthesis of substrates 1

Synthesis of substrates **1a-1h**, **1j-1z**, and **1ai**.<sup>1,2</sup>

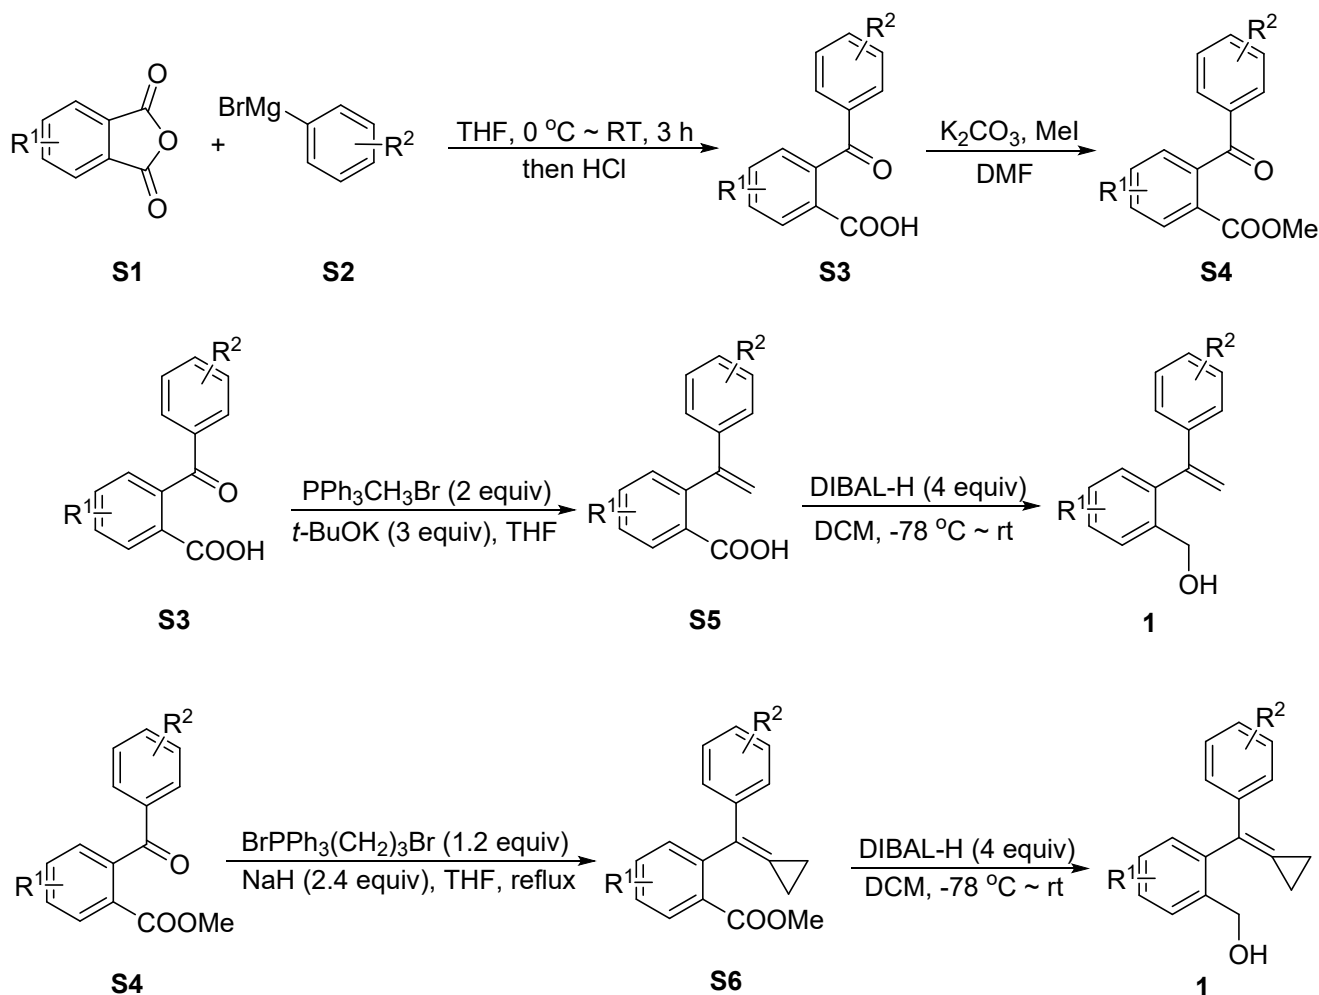

**S1** (10.0 mmol) and dry tetrahydrofuran (THF, 40.0 mL) were added to a Schlenk flask under argon atmosphere. Then Grignard's reagent **S2** (1.2 equiv) was added dropwise at 0 °C. The resulting mixture was stirred at room temperature for 3 h before quenching with a HCl (1.0 M) solution and extracted three times with ethyl acetate (EtOAc). The combine organic phase was dried over anhydrous  $Na_2SO_4$ . The organic phase was concentrated under reduced pressure and purified by a silica gel column chromatography to obtain the corresponding carboxylic acids (**S3**).

MeI (2.0 equiv) and  $K_2CO_3$  (1.5 equiv) were added to a solution of **S3** (1.0 equiv) in *N,N*-dimethylformamide (DMF). The resulting mixture was stirred at room temperature for 3 h before EtOAc was added and washed three times with water. The organic phase was dried over anhydrous



Na<sub>2</sub>SO<sub>4</sub> and concentrated under reduced pressure to obtain the corresponding crude products (**S4**).

Methyltriphenylphosphonium bromide (10.0 mmol, 2.0 equiv) and dry THF (50 mL) were added to a Schlenk flask under argon atmosphere and then *t*-BuOK (1.0 M in THF, 15 mL, 3.0 equiv) was added dropwise. The resulting mixture was stirred at room temperature for 30 minutes, then **S3** (5.0 mmol) was added and stirred for 16 h. The mixture was quenched with a NaOH (10%, 50 mL) solution, then the aqueous phase was acidified with a HCl (1.0 M) solution to pH = 1 and extracted three times with EtOAc. The combine organic phase was dried over anhydrous Na<sub>2</sub>SO<sub>4</sub>. The organic phase was concentrated under reduced pressure and purified by a silica gel column chromatography to obtain the corresponding carboxylic acids (**S5**).

3-bromopropyltriphenylphosphonium bromide (6.0 mmol, 1.2 equiv) and NaH (12.0 mmol, 1.2 equiv) were added to a Schlenk flask under argon atmosphere and then dry THF was added. The mixture was stirred at 75 °C for 2 h and then a solution of compound **S4** (5.0 mmol, 1.0 equiv) in 5.0 mL THF was added. The reaction mixture was stirred at 75 °C overnight before quenching with a HCl (1.0 M) solution and extracted three times with EtOAc. The combine organic phase was dried over anhydrous Na<sub>2</sub>SO<sub>4</sub>. The organic phase was concentrated under reduced pressure and purified by a silica gel column chromatography to obtain the corresponding products **S6**.

DIBAL-H (1.0 M, 4.0 equiv) was added slowly to a solution of **S5** or **S6** (1.0 equiv) in dry dichloromethane (DCM) at -78 °C under argon atmosphere. After that, the reaction mixture was stirred at room temperature for 3 h and quenching with 10 mL of H<sub>2</sub>O, 30.0 mL of 15% NaOH, 10 mL of H<sub>2</sub>O sequence. The resulting mixture was stirred at room temperature for 1 h and extracted three times with EtOAc. The combine organic phase was dried over anhydrous Na<sub>2</sub>SO<sub>4</sub>. The organic phase was concentrated under reduced pressure and purified by a silica gel column chromatography to obtain the corresponding products **1**.

## Synthesis of substrates **1ac-1ah**

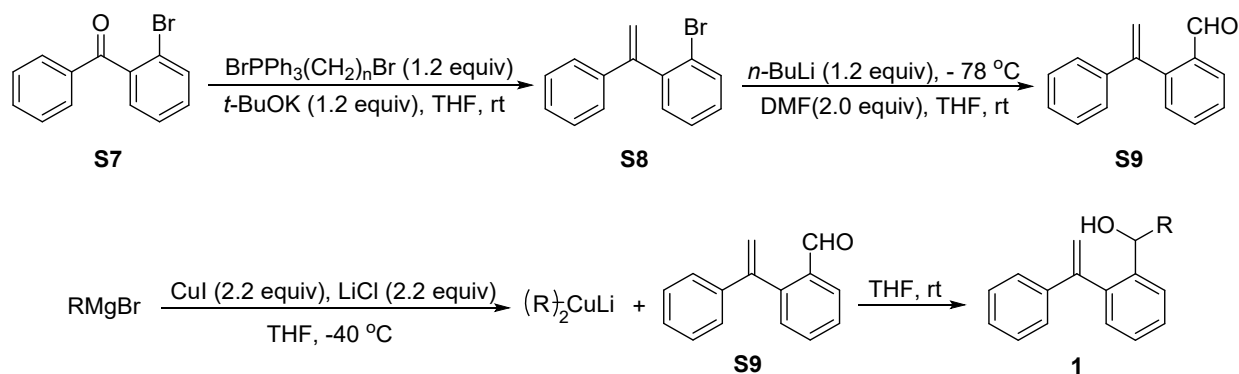

**S8** were synthesized according to the previous literature.<sup>[2]</sup> Alkyltriphenylphosphonium bromide (24.0 mmol, 1.2 equiv) and dry THF (50.0 mL) were added to a Schlenk flask under argon atmosphere and then *t*-BuOK (1.0 M in THF, 24 mL, 1.2 equiv) was added dropwise. The resulting mixture was stirred at room temperature for 30 minutes before **S3** (20.0 mmol) was added. The reaction mixture was stirred at rt for 2 h before quenching with a HCl (1.0 M) solution and extracted three times with EtOAc. The combine organic phase was dried over anhydrous Na<sub>2</sub>SO<sub>4</sub>. The organic phase was concentrated under reduced pressure and purified by a silica gel column chromatography to obtain the corresponding product **S8**.

*n*-BuLi (2.4 M, 1.2 equiv) was added slowly to a solution of **S8** (1.0 equiv) in dry THF at -78 °C under argon atmosphere. The mixture was stirred at -78 °C for 30 minutes and then DMF (5.0 mmol, 1.0 equiv) was added. The reaction was stirred at rt for 2 h before quenching with a HCl (1.0 M) solution and extracted three times with EtOAc. The combine organic phase was dried over anhydrous Na<sub>2</sub>SO<sub>4</sub>. The organic phase was concentrated under reduced pressure and purified by a silica gel column chromatography to obtain the corresponding products **S9**.

CuI (2.2 equiv), LiCl (2.2 equiv) and dry THF (30.0 mL) were added to a Schlenk flask under argon atmosphere. The resulting mixture was stirred at -40 °C for 30 minutes, then a solution of **S9** (1.0 equiv) in dry THF was added. The reaction mixture was stirred at rt for 2 h before quenching with a saturated NH<sub>4</sub>Cl solution and extracted three times with EtOAc. The combine organic phase was dried over anhydrous Na<sub>2</sub>SO<sub>4</sub>. The organic phase was concentrated under reduced pressure and purified by a silica gel column chromatography to obtain the corresponding products **1**.

### Synthesis of substrates **1r** and **1aj**<sup>3</sup>

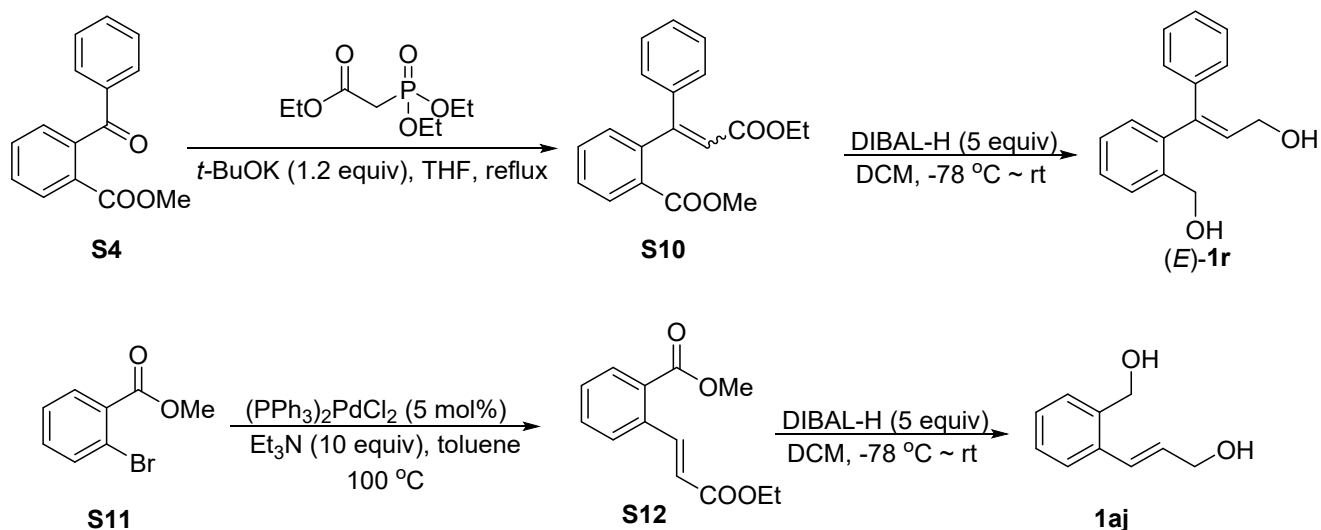

Phosphate ester and dry THF were added to a Schlenk flask under argon atmosphere and then *t*-BuOK (1.0 M in THF) was added dropwise. The resulting mixture was stirred at room temperature for 30 minutes before **S4** was added. The reaction mixture was stirred at 75 °C overnight before quenching with a HCl (1.0 M) solution and extracted three times with EtOAc. The combine organic phase was dried over anhydrous Na<sub>2</sub>SO<sub>4</sub>. The organic phase was concentrated under reduced pressure and purified by a silica gel column chromatography to obtain the corresponding products **S10**.

(PPh<sub>3</sub>)<sub>2</sub>PdCl<sub>2</sub>, Et<sub>3</sub>N, **S11**, and dry toluene (30.0 mL) were added to a Schlenk flask under argon atmosphere. The reaction mixture was stirred at 75 °C overnight. The organic phase was concentrated under reduced pressure and purified by a silica gel column chromatography to obtain the corresponding products **S12**.

DIBAL-H (1.0 M, 5.0 equiv) was added slowly to a solution of **S10** or **S12** (1.0 equiv) in dry dichloromethane (DCM) at -78 °C under argon atmosphere. After that, the reaction mixture was stirred at room temperature for 3 h and quenching with 10 mL of H<sub>2</sub>O, 30.0 mL of 15% NaOH, 10 mL of H<sub>2</sub>O sequence. The resulting mixture was stirred at room temperature for 1 h and extracted three times with EtOAc. The combine organic phase was dried over anhydrous Na<sub>2</sub>SO<sub>4</sub>. The organic phase was concentrated under reduced pressure and purified by a silica gel column chromatography to obtain the corresponding products **1r** or **1aj**.

### Synthesis of substrate **1al**

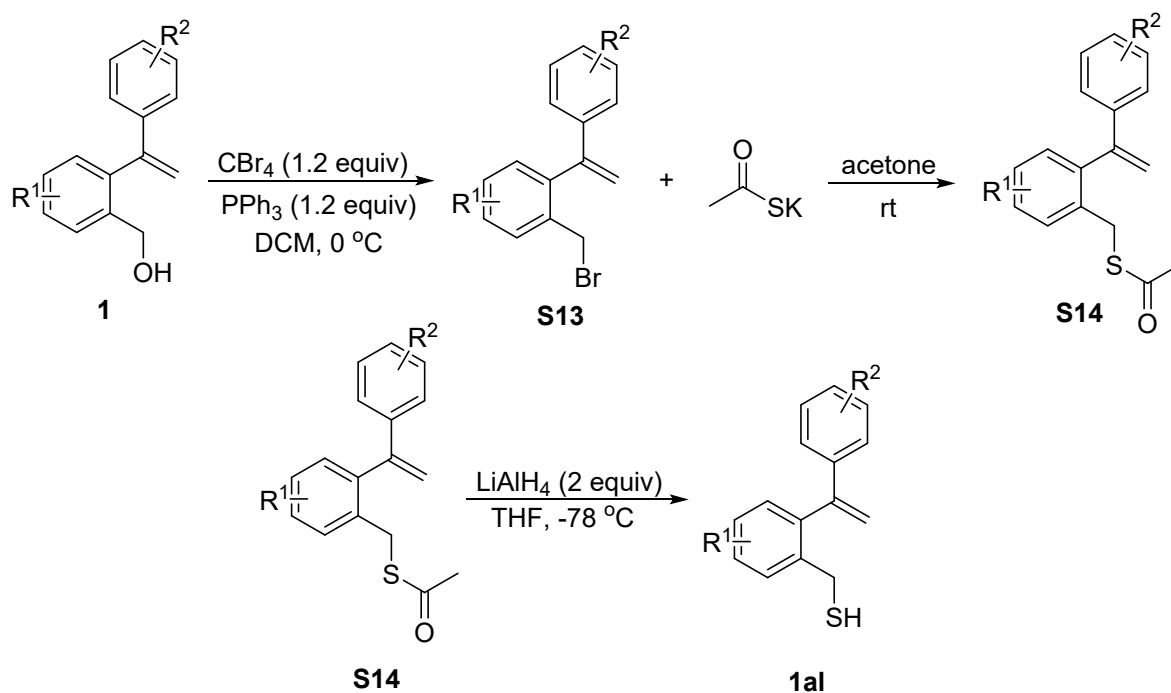

**1** (5.0 mmol),  $\text{CBr}_4$  (6.0 mmol, 1.2 equiv) and dry  $\text{DCM}$  (10 mL) were added to a Schlenk flask under argon atmosphere and then  $\text{PPh}_3$  (1.0 M in  $\text{DCM}$ , 6.0 mL, 1.2 equiv) was added dropwise at  $-0\text{ }^\circ\text{C}$ . The reaction mixture was stirred at  $0\text{ }^\circ\text{C}$  for 2 h before quenching with  $\text{H}_2\text{O}$  and extracted three times with  $\text{EtOAc}$ . The combine organic phase was dried over anhydrous  $\text{Na}_2\text{SO}_4$ . The organic phase was concentrated under reduced pressure and purified by a silica gel column chromatography to obtain the corresponding product **S13**.

**S13** (4.0 mmol), potassium thioacetate (4.8 mmol, 1.2 equiv), and acetone (20 mL) were added to a Schlenk flask under argon atmosphere. The reaction mixture was stirred at  $\text{rt}$  overnight before quenching with  $\text{H}_2\text{O}$  and extracted three times with  $\text{EtOAc}$ . The combine organic phase was dried over anhydrous  $\text{Na}_2\text{SO}_4$ . The organic phase was concentrated under reduced pressure and purified by a silica gel column chromatography to obtain the corresponding products **S14**.

$\text{LiAlH}_4$  (1.0 M, 2.0 equiv) was added slowly to a solution of **S14** (1.0 equiv) in dry  $\text{THF}$  at  $-78\text{ }^\circ\text{C}$  under argon atmosphere. After that, the reaction mixture was stirred at  $-78\text{ }^\circ\text{C}$  for 3 h and quenching with 10 mL of  $\text{H}_2\text{O}$ , 30.0 mL of 15%  $\text{NaOH}$ , 10 mL of  $\text{H}_2\text{O}$  sequence. The resulting mixture was stirred at room temperature for 1 h and extracted three times with  $\text{EtOAc}$ . The combine organic phase was dried over anhydrous  $\text{Na}_2\text{SO}_4$ . The organic phase was concentrated under reduced pressure and purified by a silica gel column chromatography to obtain the corresponding product **1al**.

Synthesis of the deuterated substrates.<sup>4</sup>

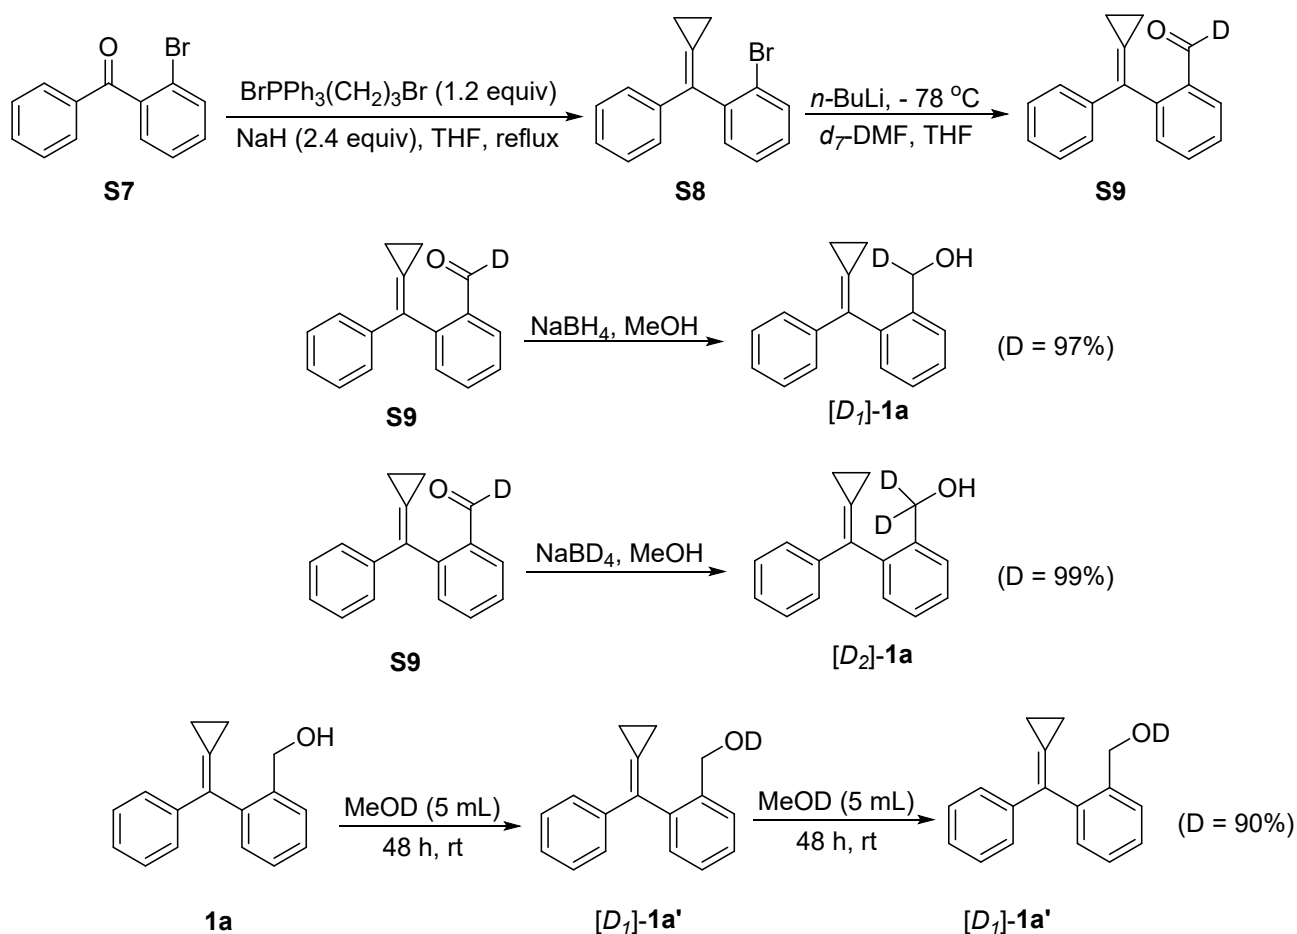

3-bromopropyltriphenylphosphonium bromide (6.0 mmol, 1.2 equiv) and NaH (12.0 mmol, 1.2 equiv) were added to a Schlenk flask under argon atmosphere and then dry THF was added. The mixture was stirred at 75 °C for 2 h and then a solution of compound **S7** (5.0 mmol, 1.0 equiv) in 5 mL THF was added. The reaction mixture was stirred at 75 °C overnight before quenching with a HCl (1.0 M) solution and extracted three times with EtOAc. The combine organic phase was dried over anhydrous Na<sub>2</sub>SO<sub>4</sub>. The organic phase was concentrated under reduced pressure and purified by a silica gel column chromatography to obtain the corresponding product **S8**.

**S8** (4.0 mmol) and dry tetrahydrofuran (THF, 10 mL) were added to a Schlenk flask under argon atmosphere, then *n*-BuLi (2.4 M, 1.2 equiv) was added dropwise at -78 °C. The mixture was stirred at -78 °C for 1 h, and then *d*<sub>7</sub>-DMF was added slowly. Afterward, the reaction mixture was stirred at rt for 3 h before quenching with H<sub>2</sub>O and extracted three times with EtOAc. The combine organic phase was dried over anhydrous Na<sub>2</sub>SO<sub>4</sub>. The organic phase was concentrated under reduced pressure and purified by a silica gel column chromatography to obtain the corresponding product **S9**.

NaBH<sub>4</sub> (1.2 equiv) was added slowly to a solution of **S9** (1.0 equiv) in MeOH at 0 °C. After that, the reaction mixture was stirred at room temperature for 3 h before quenching with H<sub>2</sub>O and extracted three times with EtOAc. The combine organic phase was dried over anhydrous Na<sub>2</sub>SO<sub>4</sub>. The organic phase was concentrated under reduced pressure and purified by a silica gel column chromatography to obtain the deuterated product [*D*<sub>1</sub>]-**1a** with 97% D content.

NaBD<sub>4</sub> (1.2 equiv) was added slowly to a solution of **S9** (1.0 equiv) in MeOH at 0 °C. After that, the reaction mixture was stirred at room temperature for 3 h before quenching with H<sub>2</sub>O and extracted three times with EtOAc. The combine organic phase was dried over anhydrous Na<sub>2</sub>SO<sub>4</sub>. The organic phase was concentrated under reduced pressure and purified by a silica gel column chromatography to obtain the deuterated product [*D*<sub>2</sub>]-**1a** with 99% D content.

(2-(cyclopropylidene(phenyl)methyl)phenyl)methanol **1a** (2.0 mmol) was added to MeOD (5 mL) in a Schlenk tube and the mixture was stirred at room temperature for 48 h. The reaction solvent was removed by reduced pressure distillation. Repeat the above operation to obtain deuterated product [*D*<sub>1</sub>]-**1a'** with 90% D content.

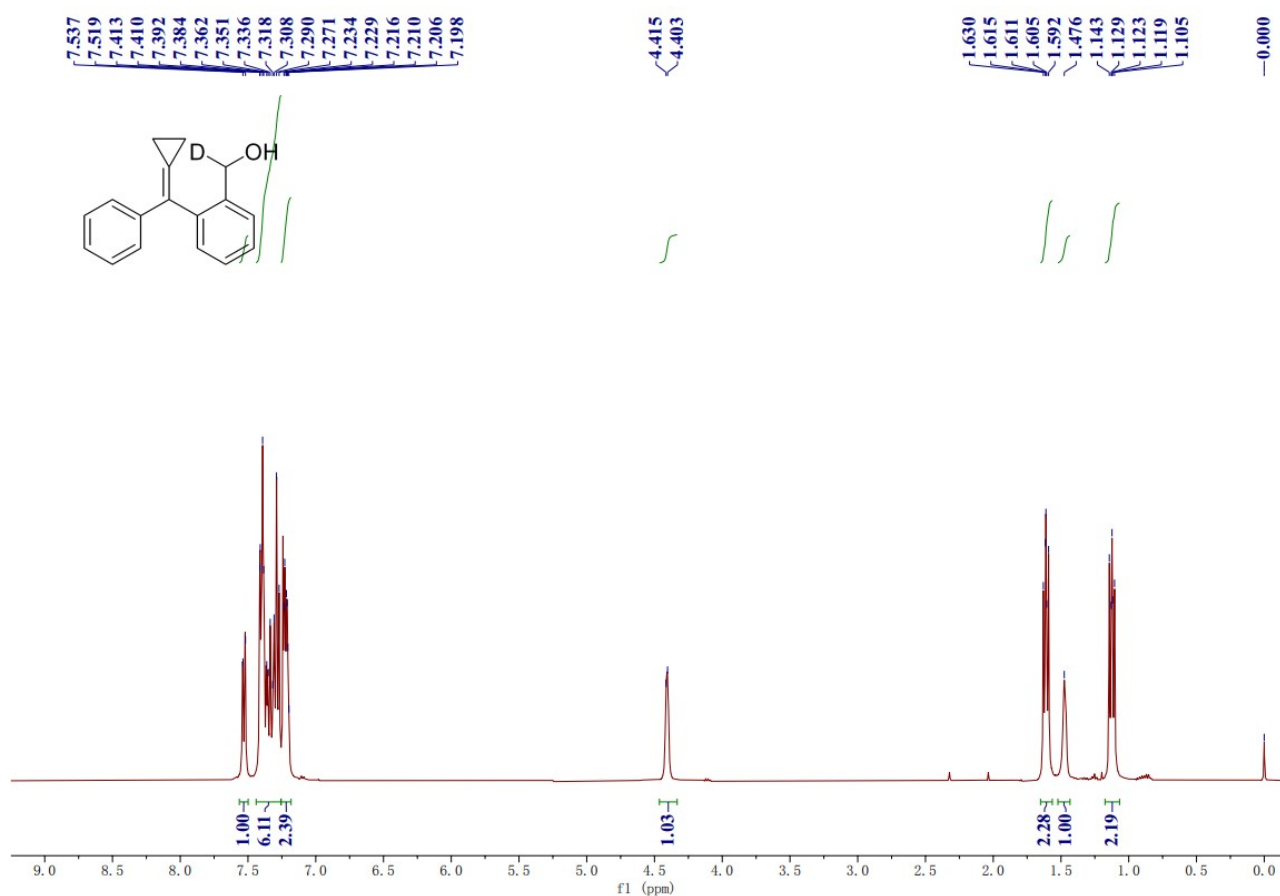

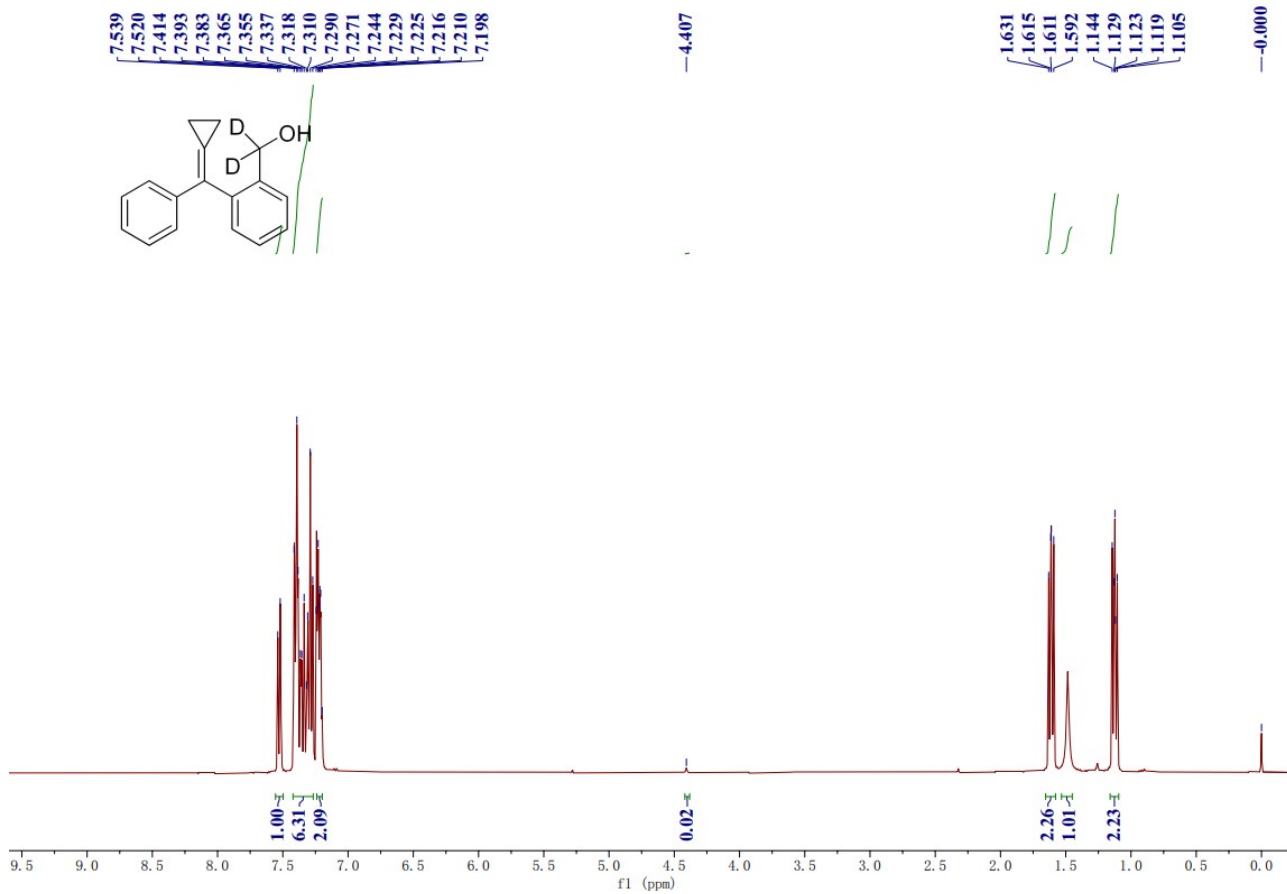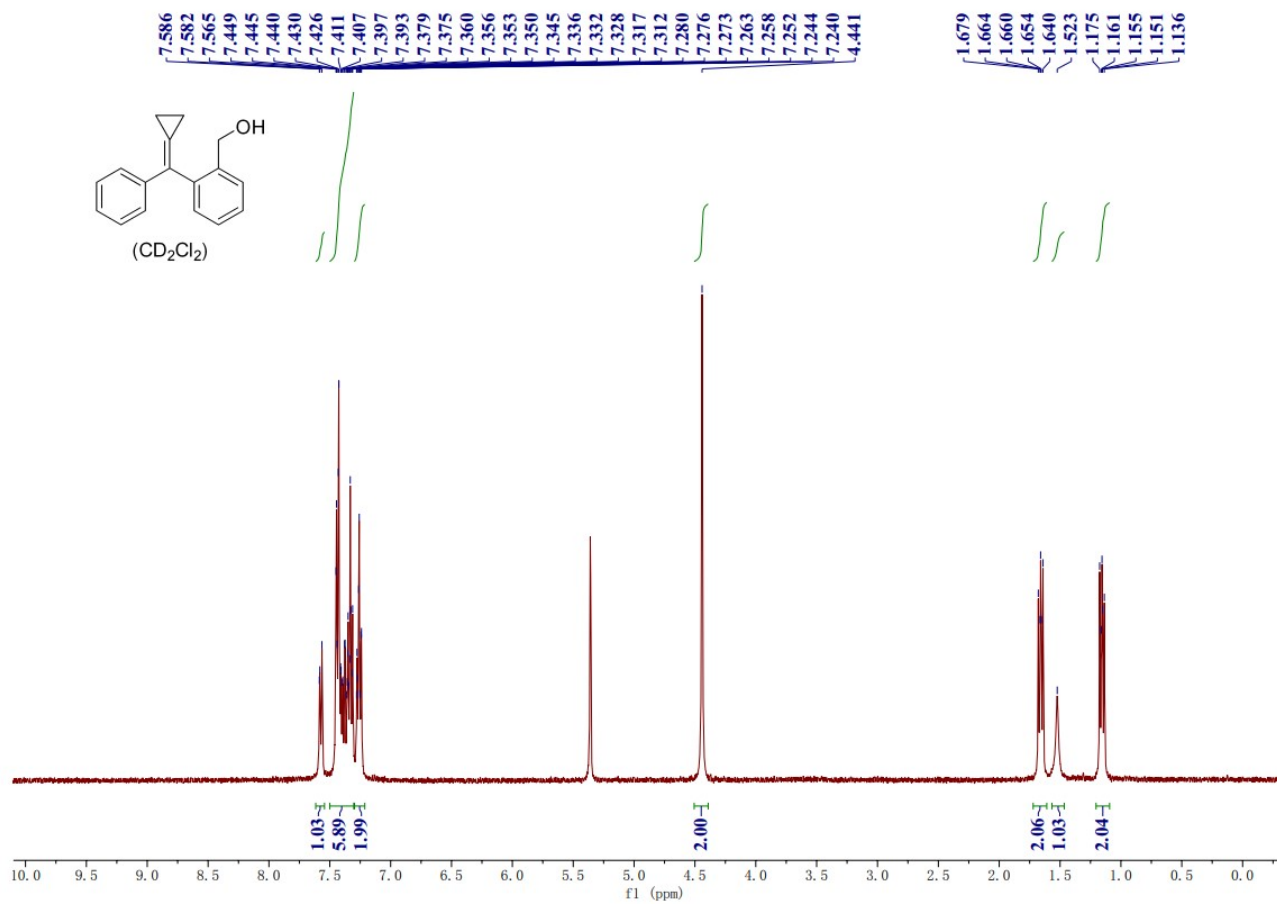

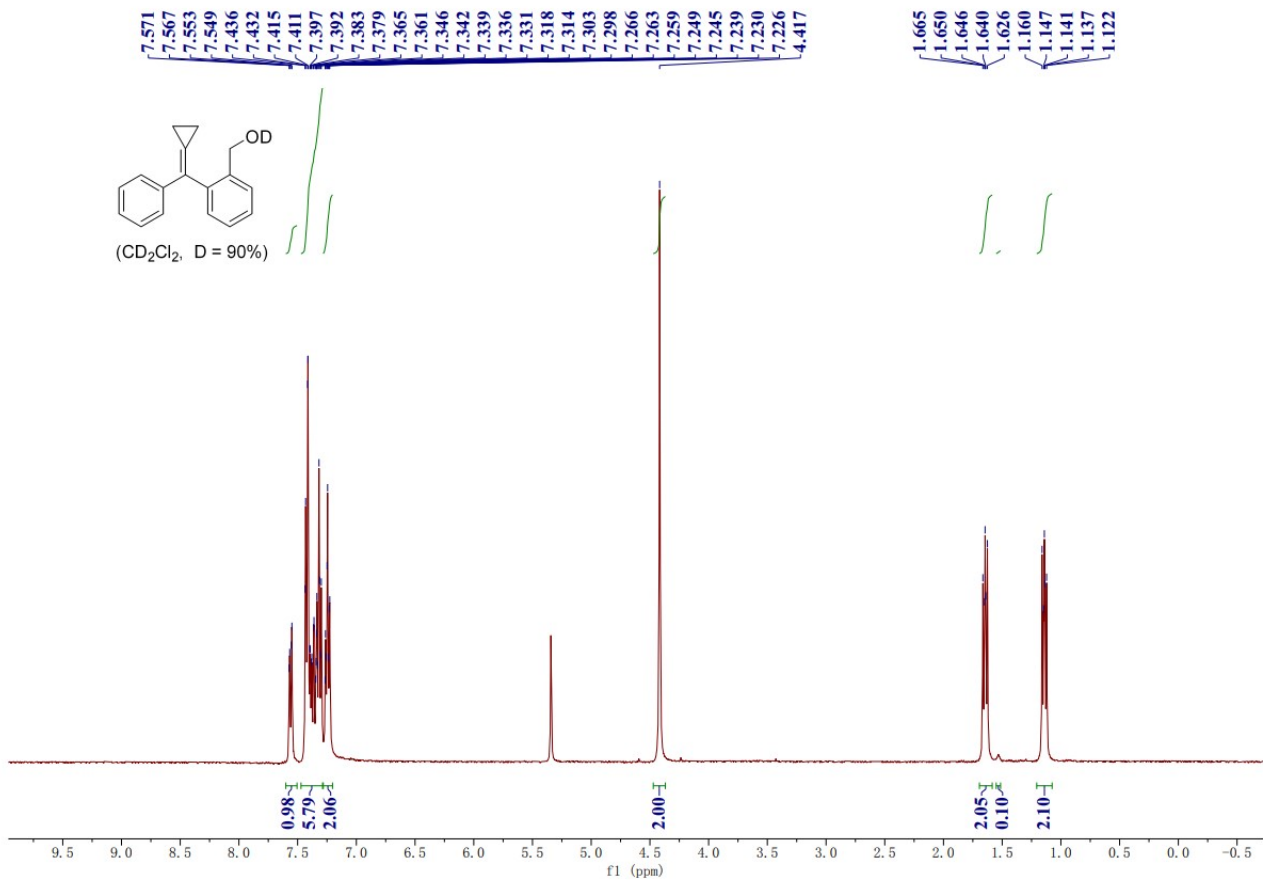



### 3. General procedure for the synthesis of 2

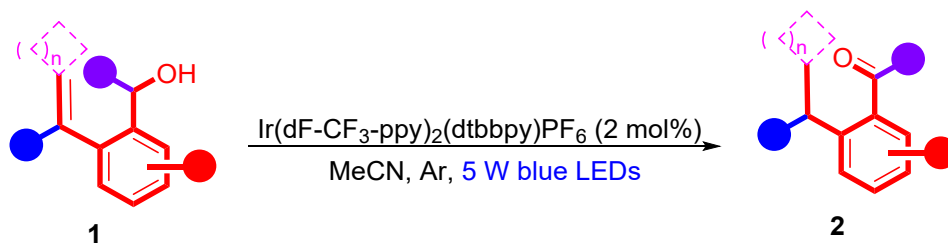

To a 10.0 mL sealed tube were added substrate **1** (0.20 mmol, 1.0 equiv), Ir(dF-CF<sub>3</sub>-ppy)<sub>2</sub>(dtbbpy)PF<sub>6</sub> (0.004 mmol, 0.02 equiv), and CH<sub>3</sub>CN (2.0 mL), then the resulting mixture was bubbled with argon for 15 minutes. The resulting mixture was stirred upon irradiation of 5 W blue LEDs at rt for 3 - 48 hours. Then, the solvent was removed under vacuum and the residue was purified by a silica gel column chromatography (petroleum ether : ethyl acetate = 10 : 1) to give the desired products **2** in 24 - 96% yields.

## 4. Mechanistic Investigations

### 4.1 Deuterium labeling experiment

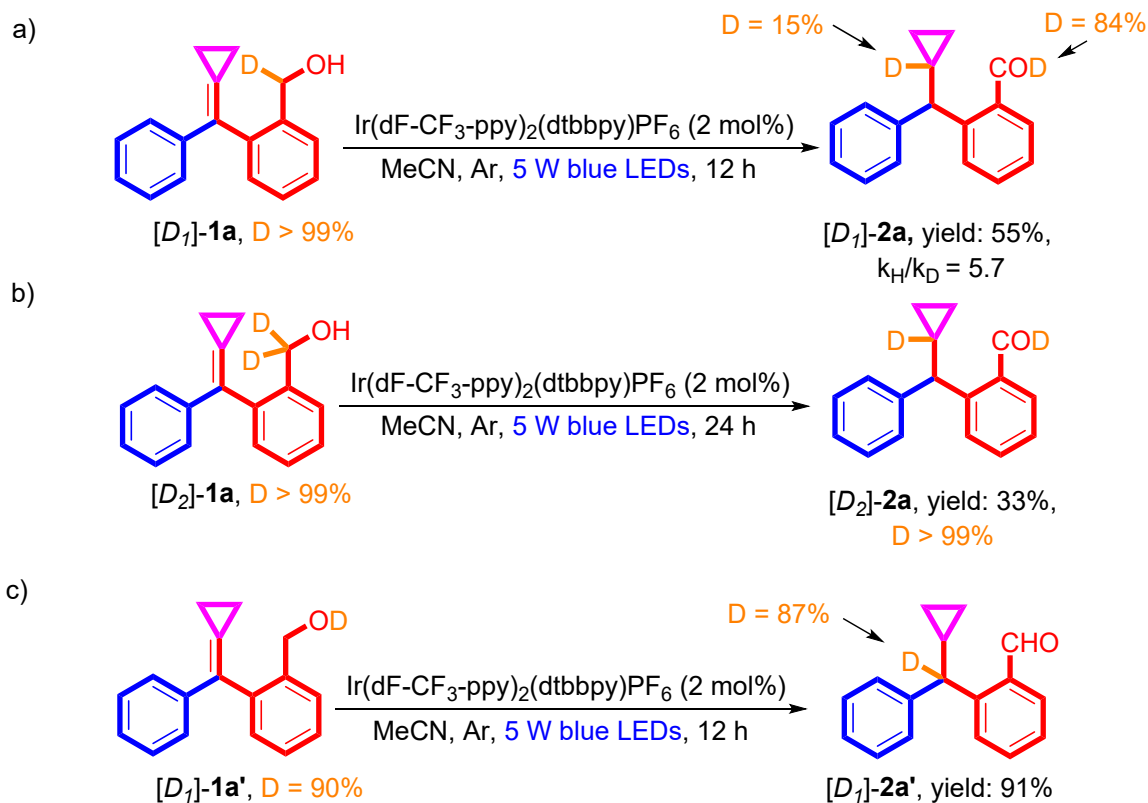

Experimental procedure:

a) To a 10.0 mL sealed tube were added substrate [ $D_1$ ]-**1a** (0.20 mmol, 1.0 equiv), Ir(dF-CF<sub>3</sub>-ppy)<sub>2</sub>(dtbbpy)PF<sub>6</sub> (0.004 mmol, 0.02 equiv), and CH<sub>3</sub>CN (2.0 mL), then the resulting mixture was bubbled with argon for 15 minutes. The resulting mixture was stirred upon irradiation of 5 W blue LEDs at rt for 12 hours. Then, the solvent was removed under vacuum and the residue was purified by a silica gel column chromatography (petroleum ether: ethyl acetate = 10 : 1) to give the desired product [ $D_1$ ]-**2a** in 55% yield.

b) To a 10.0 mL sealed tube were added substrate [ $D_2$ ]-**1a** (0.20 mmol, 1.0 equiv), Ir(dF-CF<sub>3</sub>-ppy)<sub>2</sub>(dtbbpy)PF<sub>6</sub> (0.004 mmol, 0.02 equiv), and CH<sub>3</sub>CN (2.0 mL), then the resulting mixture was bubbled with argon for 15 minutes. The resulting mixture was stirred upon irradiation of 5 W blue LEDs at rt for 24 hours. Then, the solvent was removed under vacuum and the residue was purified

by a silica gel column chromatography (petroleum ether: ethyl acetate = 10 : 1) to give the desired product  $[D_2]$ -**2a** in 50% yield with 99% D content.

c) To a 10.0 mL sealed tube were added substrate  $[D_1]$ -**1a'** (0.20 mmol, 1.0 equiv), Ir(dF-CF<sub>3</sub>-ppy)<sub>2</sub>(dtbbpy)PF<sub>6</sub> (0.004 mmol, 0.02 equiv), and CH<sub>3</sub>CN (2.0 mL), then the resulting mixture was bubbled with argon for 15 minutes. The resulting mixture was stirred upon irradiation of 5 W blue LEDs at rt for 24 hours. Then, the solvent was removed under vacuum and the residue was purified by a silica gel column chromatography (petroleum ether: ethyl acetate = 10 : 1) to give the desired product  $[D_1]$ -**2a'** in 91% yield with 87% D content.

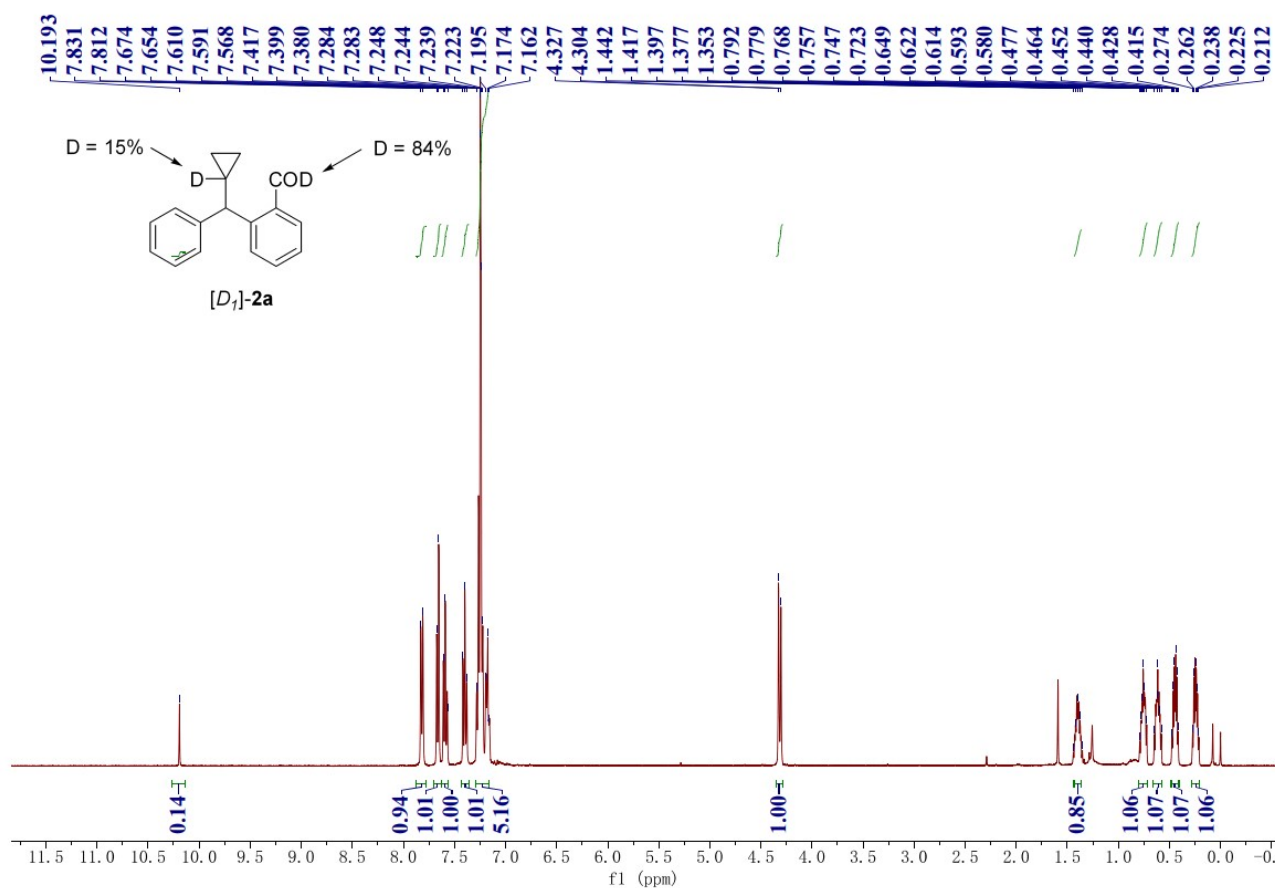

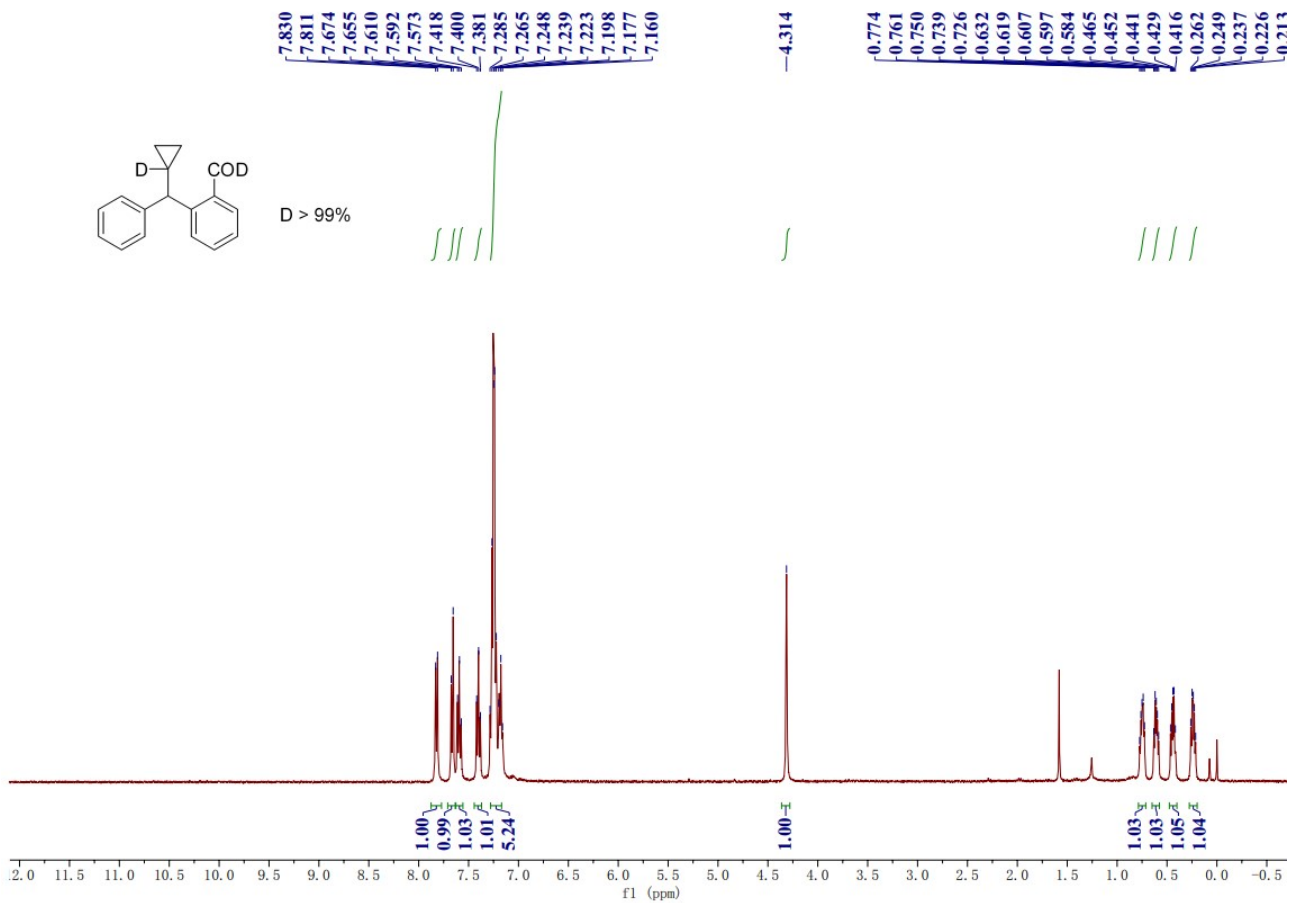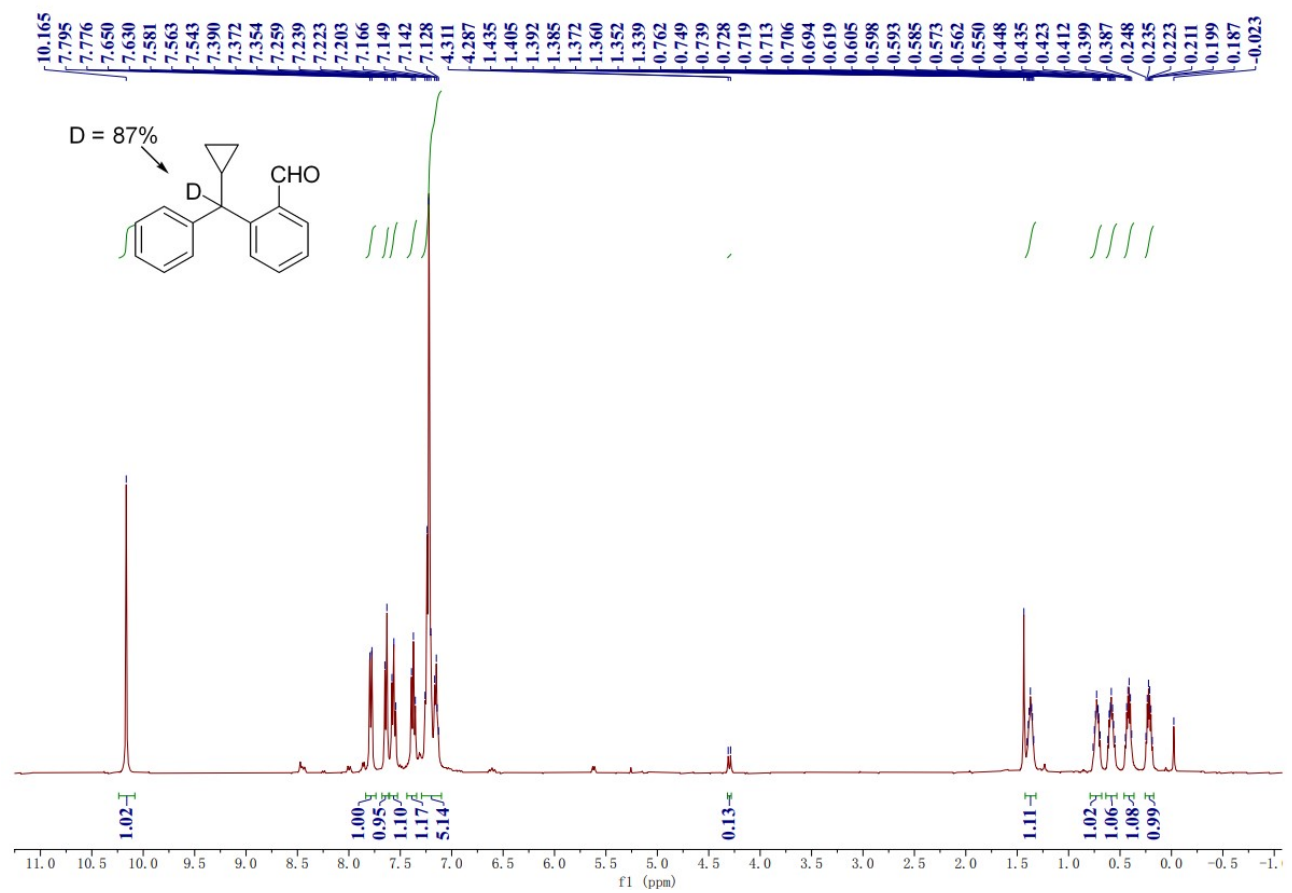

## 4.2 Luminescence quenching experiments (Stern-Volmer studies).

Emission intensities were recorded using a Hitachi F-4600 FL spectrophotometer with a 10 nm band width. Different concentration of **1a** solutions were prepared and added to a 1 cm path length quartz cuvette fitted with a Teflon® septum under argon atmosphere. In this experiment, the appropriate amount of **1a** was added to a 0.001 M photocatalyst solution in MeCN under an argon atmosphere and the emission from the sample was collected. The photocatalyst was excited at 435 nm and the emission intensity is collected at 430-600 nm.

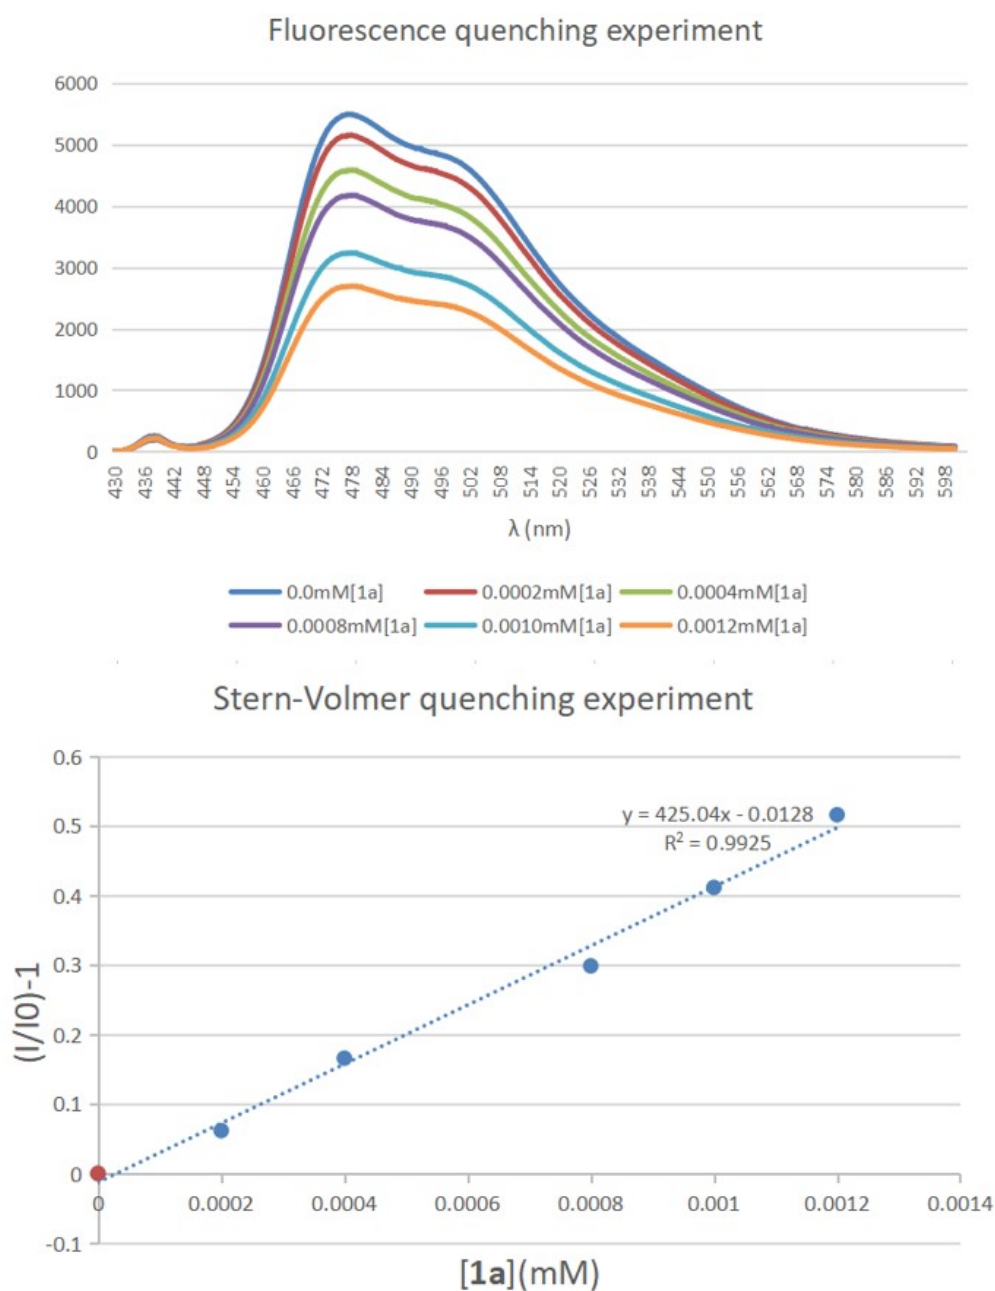

### 4.3 Cyclic Voltammetry Experiments

Cyclic Voltammogram was recorded by the CH Instruments Electrochemical Workstation model CHI760E used a Pt as counter electrode, a glassy carbon as working electrode and a saturated glycerol electrode as reference electrode. A solution of the substrates **1a** or **1l** in MeCN (0.1 M) was tested with 0.1 M Bu<sub>4</sub>NPF<sub>6</sub> as the supporting electrolyte. Scan rate = 0.1 V/s.

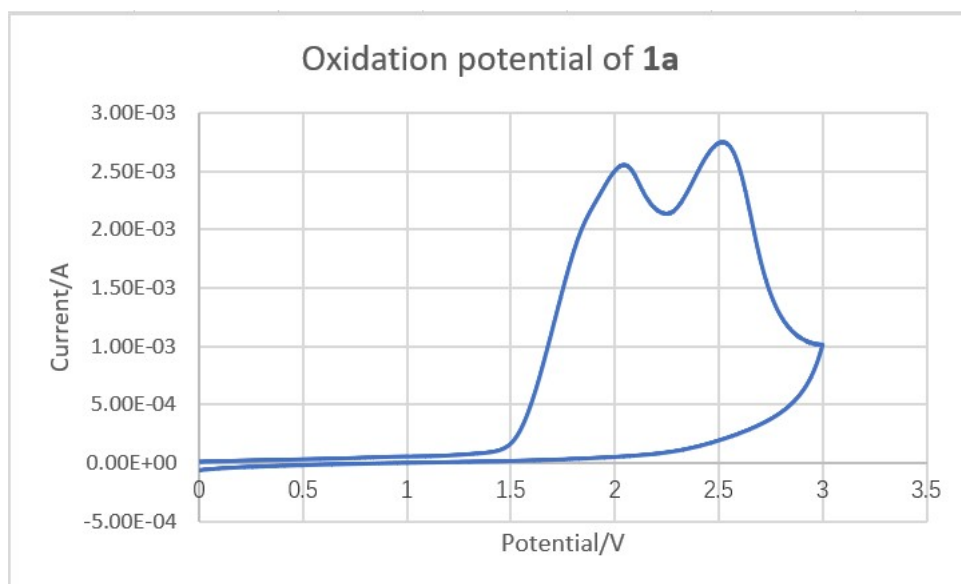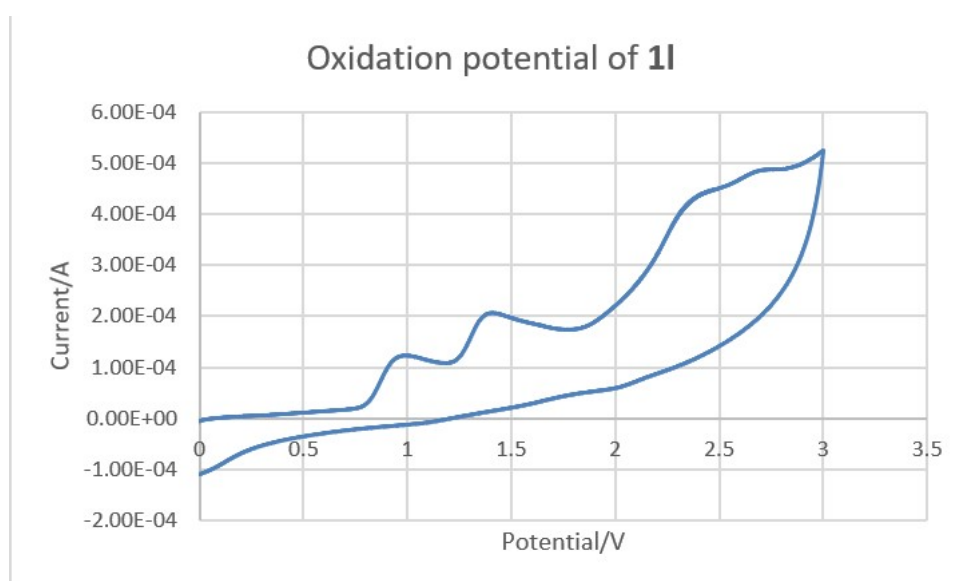

### 4.3 Quantum Yield and Light on/off Experiments

To further investigate whether the reaction involved a chain process, we measured the quantum yield of the reaction of **1a**.

$$\phi = \frac{n_x}{n_p} = \frac{n_x}{\frac{\Delta E \times S \times t}{N_A h \nu}} = \frac{n_x \times N_A \times h \times c}{\Delta E \times S \times t \times \lambda}$$

$n_x$  is the amount of photochemical or photophysical events  $x$  occurred during irradiation,  $n_p$  is the number of photons absorbed by the reactant.  $E$  is the radiant power.  $S$  is the irradiated area.  $t$  is the irradiated time.  $N_A$  is the Avogadro constant.  $h$  is the Planck constant.  $\nu$  is the frequency of incident light.  $n_x$  was analyzed by  $^1\text{H}$  NMR,  $\Delta E$  was measured by ILT1400 Portable Radiometer/Photometer.<sup>5</sup>

To a cuvette were added substrate **1** (0.20 mmol, 1.0 equiv), Ir(dF-CF<sub>3</sub>-ppy)<sub>2</sub>(dtbbpy)PF<sub>6</sub> (0.004 mmol, 0.02 equiv), and CH<sub>3</sub>CN (2.0 mL), then the resulting mixture was bubbled with argon for 15 minutes. The resulting mixture was stirred upon irradiation of 100 W blue LEDs at rt for 30 min. The reaction mixture was concentrated in *vacuo* and analyzed by  $^1\text{H}$  NMR spectrum using 1,3,5-trimethoxybenzene as an internal standard. The quantum yield is calculated to be 0.13.

In the control experiment shown below, successive intervals of irradiation and dark periods. The result was that the reaction process was completely interrupted in the absence of light and resumed with further light, demonstrating that continuous light is necessary for the **1a** to **2a** conversion process.

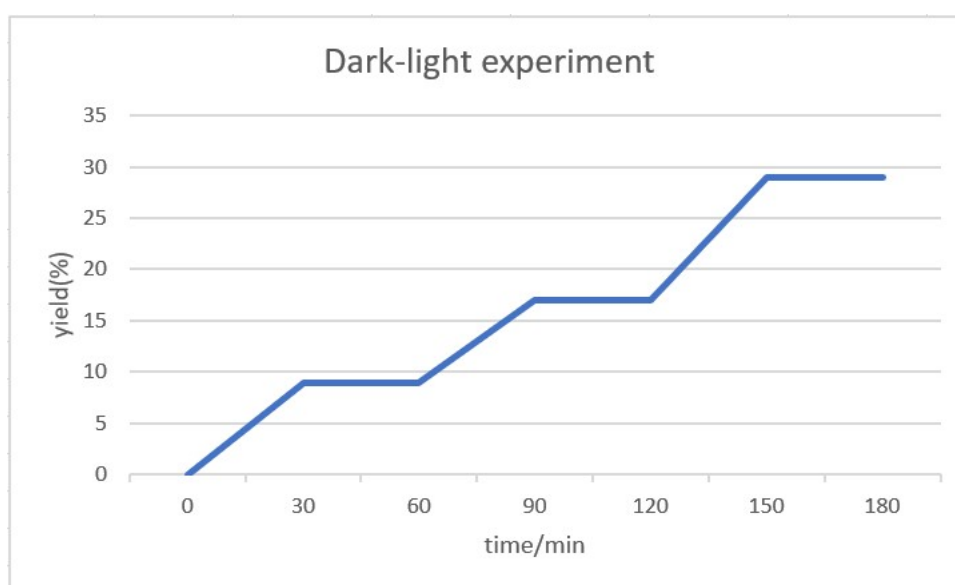

## 5. Transformation of the products

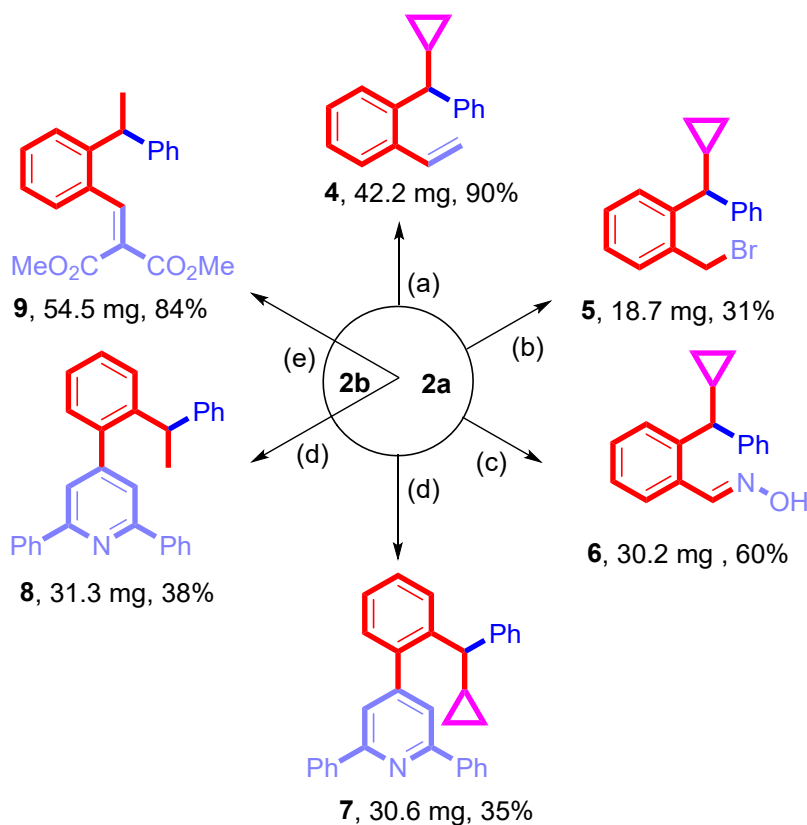

(a) Methyltriphenylphosphonium bromide (0.40 mmol, 2.0 equiv) and dry THF (5.0 mL) were added to a flame-dried Schlenk tube under argon atmosphere and then *t*-BuOK (1.0 M in THF, 0.4 mL, 2.0 equiv) was added dropwise. The resulting mixture was stirred at room temperature for 30 minutes, then **2a** (0.2 mmol) was added and stirred for 3 h before quenching with a HCl (1.0 M) solution and extracted three times with EtOAc. The combine organic phase was dried over anhydrous Na<sub>2</sub>SO<sub>4</sub>. The organic phase was concentrated under reduced pressure and purified by a silica gel column chromatography to obtain the corresponding product **4**.

(b) To a flame-dried Schlenk tube were added **2a** (0.20 mmol, 1.0 equiv), phenylsilane (0.24 mmol, 1.2 equiv), boron tribromide (0.24 mmol, 1.2 equiv, 0.24 mL 1.0 M solution in DCM) and anhydrous DCM (0.6 mL) under argon. The resulting mixture was stirred for 3 h before quenching with a solution of pinacol (0.6 mmol, 3.0 equiv) in Et<sub>3</sub>N (1.0 mL). The organic phase was concentrated under reduced pressure and purified by a silica gel column chromatography to obtain the corresponding product **5**.



(c) To a flame-dried Schlenk tube were added **2a** (0.20 mmol, 1.0 equiv),  $\text{NH}_2\text{OH}\cdot\text{HCl}$  (0.24 mmol, 1.2 equiv),  $\text{CH}_3\text{COONa}$  (0.24 mmol, 1.2 equiv) and  $\text{HCOOH}/\text{H}_2\text{O}$  (2.0 mL, 3 : 2) and the resulting mixture was stirred at 80 °C for 3 h. The organic phase was concentrated under reduced pressure and purified by a silica gel column chromatography to obtain the corresponding product **6**

(d) To a flame-dried Schlenk tube were added **2a** (0.20 mmol, 1.0 equiv) or **2b** (0.20 mmol, 1.0 equiv), phenylacetophenone (0.60 mmol, 3.0 equiv),  $\text{NH}_4\text{I}$  (0.40 mmol, 2 equiv), DMSO (0.60 mmol, 3.0 equiv) and  $\text{PhCl}$  (0.8 mL) and the resulting mixture was stirred at 130 °C for 12 h under molecular oxygen (1.0 atm). The organic phase was concentrated under reduced pressure and purified by a silica gel column chromatography to obtain the corresponding products **7** or **8**.

(e) To a flame-dried Schlenk tube were added **2b** (0.20 mmol, 1.0 equiv), dimethyl malonate (0.40 mmol, 2 equiv)  $\text{AcOH}$  (0.02 mmol, 10 mol%), piperazine (0.02 mmol, 10 mol%), and toluene (2.0 mL) and the resulting mixture was stirred at 100 °C for 12 h. The organic phase was concentrated under reduced pressure and purified by a silica gel column chromatography to obtain the corresponding product **9**.

## 6. Spectroscopic data of substrates 1

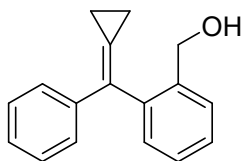

### (2-(cyclopropylidene(phenyl)methyl)phenyl)methanol (1a)

A white solid, M.P.: 116-118 °C, 2100 mg, 82% yield. <sup>1</sup>H NMR (CDCl<sub>3</sub>, TMS, 400 MHz) δ 7.54 (d, *J* = 7.2 Hz, 1H), 7.42 -7.37 (m, 3H), 7.34-7.27 (m, 3H), 7.24-7.20 (m, 2H), 4.44 (d, *J* = 6.0 Hz, 2H), 1.64-1.57 (m, 2H) 1.42 (t, *J* = 6.0 Hz, 1H), 1.15-1.11 (m, 2H). <sup>13</sup>C NMR (CDCl<sub>3</sub>, TMS, 100 MHz) δ 140.2, 139.6, 139.2, 130.3, 128.4, 127.8, 127.7, 127.6, 127.1, 126.5, 125.0, 77.4, 77.1, 76.8, 63.2, 5.6, 1.7. IR (acetone) ν 3274, 3050, 2923, 1596, 1490, 1442, 1364, 1158, 1004, 835 cm<sup>-1</sup>. HRMS (EI) Calcd. for C<sub>17</sub>H<sub>16</sub>O (M<sup>+</sup>): 238.1196, Found: 238.1194.

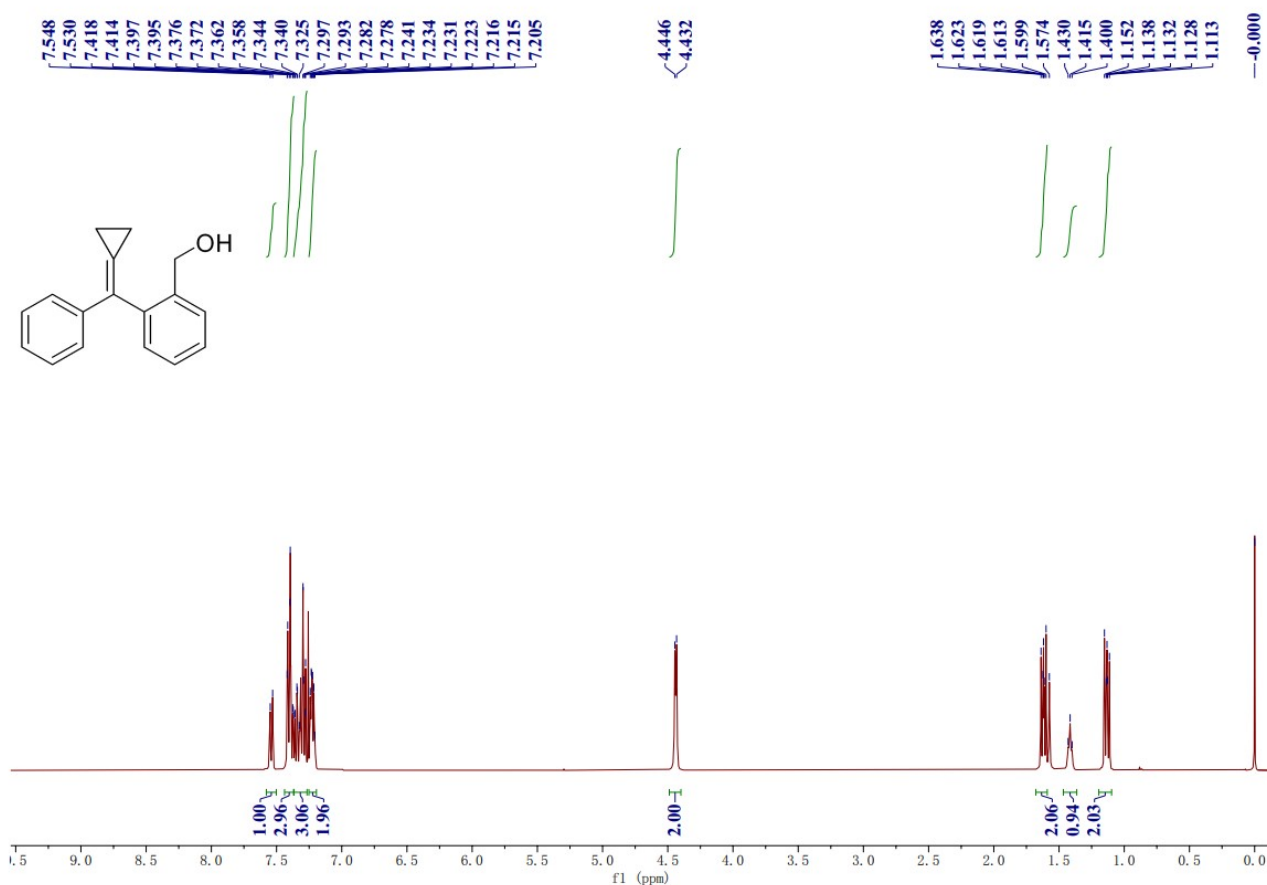

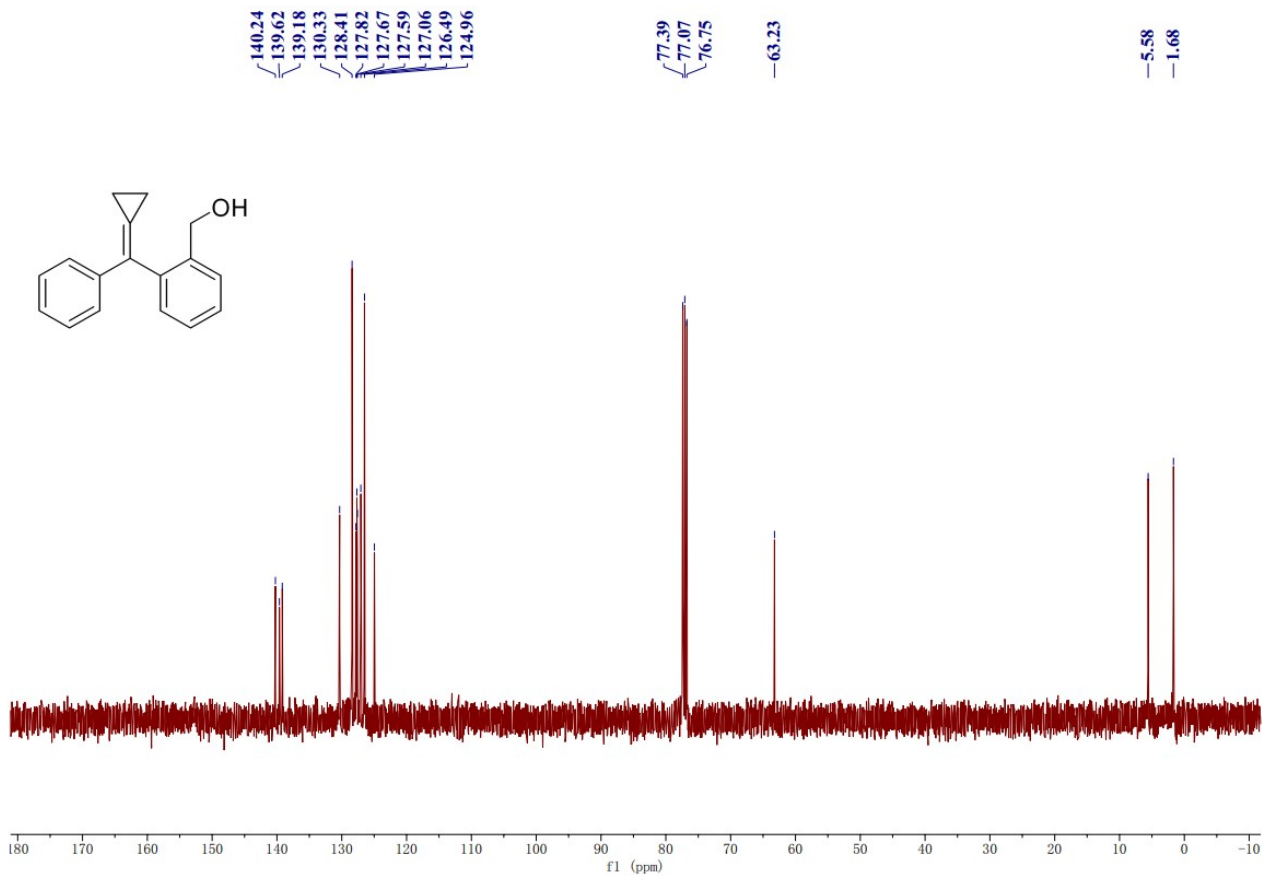

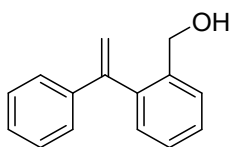

### (2-(1-phenylvinyl)phenyl)methanol (1b)

This is a known compound and its spectroscopic data are consistent with those in the previous literature.<sup>1</sup> CAS number: 71264-86-3. A colorless oil. 908 mg, 80% yield. <sup>1</sup>H NMR (CDCl<sub>3</sub>, TMS, 400 MHz) δ 7.49 (d, *J* = 7.6 Hz, 1H), 7.40-7.36 (m, 1H), 7.35-7.25 (m, 7H), 5.79 (d, *J* = 1.4 Hz, 1H), 5.25 (d, *J* = 1.4 Hz, 1H), 4.43 (s, 2H), 1.55 (br, 1H). <sup>13</sup>C NMR (CDCl<sub>3</sub>, TMS, 150 MHz) δ 148.3, 140.6, 140.5, 138.7, 130.2, 128.6, 128.1, 128.1, 128.0, 127.6, 126.6, 115.7, 63.2.

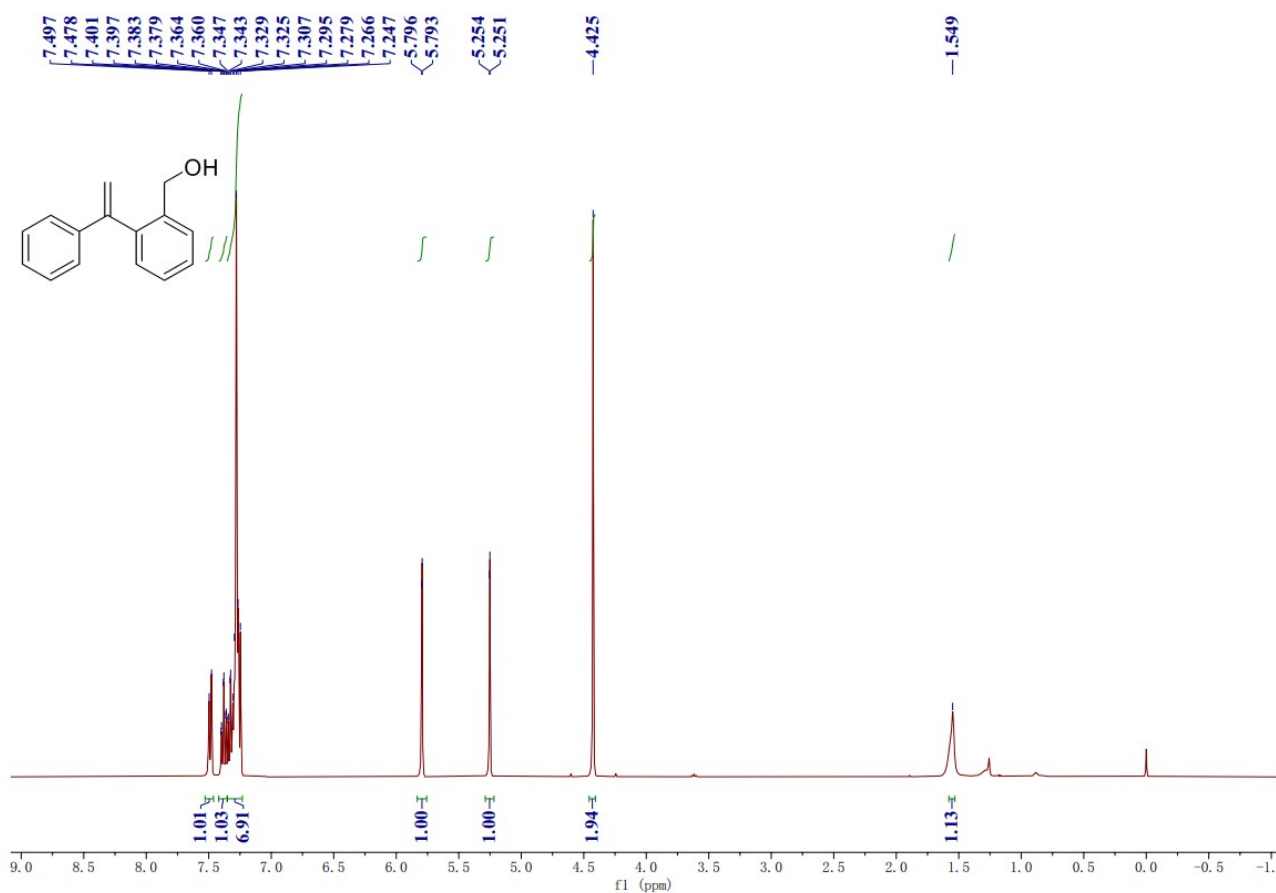

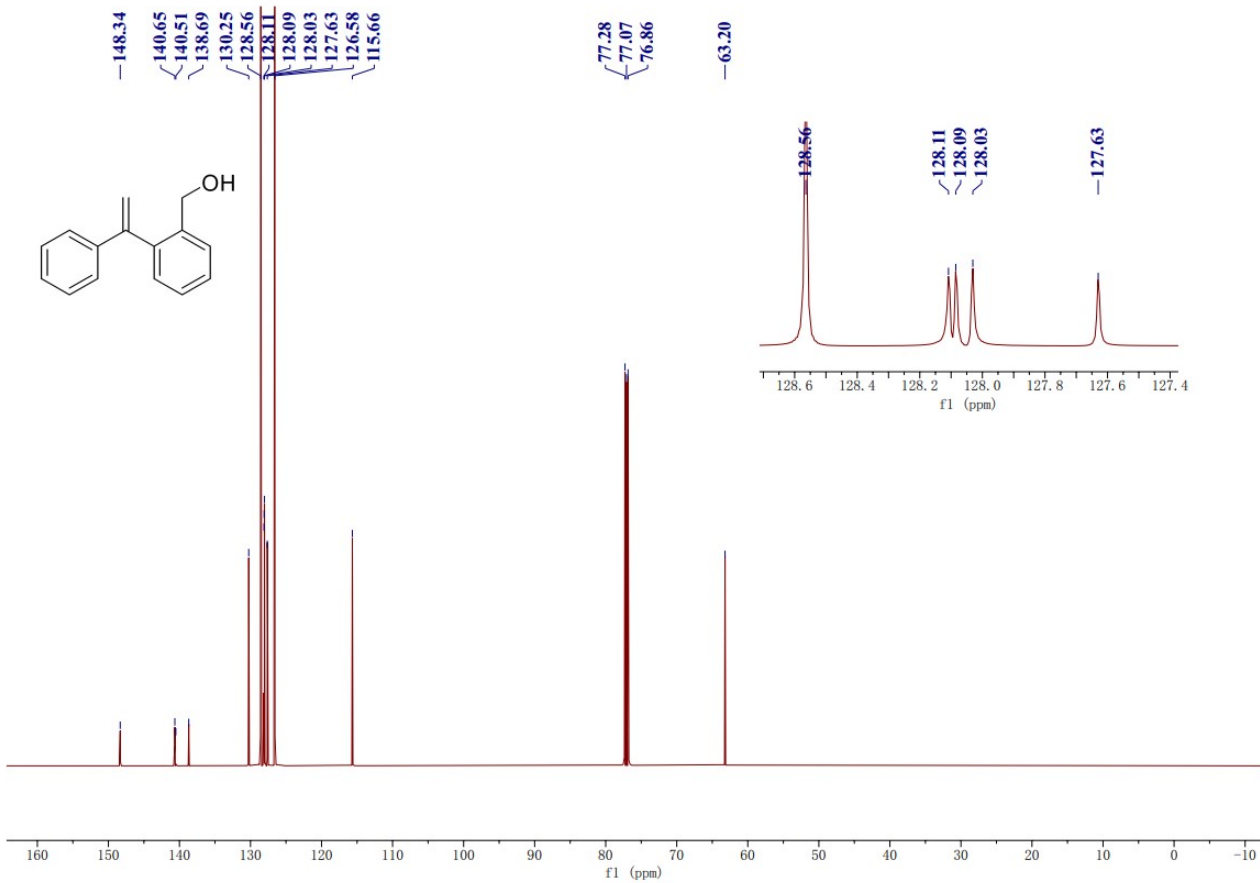

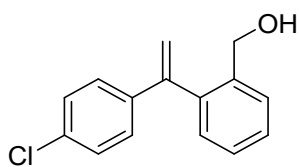

**(2-(1-(4-chlorophenyl)vinyl)phenyl)methanol (1c)**

This is a known compound and its spectroscopic data are consistent with those in the previous literature.<sup>1</sup> CAS number: 98216-74-1. A colorless oil. 843 mg, 71% yield. <sup>1</sup>H NMR (CDCl<sub>3</sub>, TMS, 400 MHz) δ 7.51 (d, *J* = 7.6 Hz, 1H), 7.41-7.33 (m, 2H), 7.30-7.20 (m, 5H), 5.80 (s, 1H), 5.27 (s, 1H), 4.42 (s, 2H), 1.96 (s, 1H). <sup>13</sup>C NMR (CDCl<sub>3</sub>, TMS, 100 MHz) δ 147.1, 139.8, 139.0, 138.6, 133.8, 130.1, 128.7, 128.2, 127.88, 127.85, 127.6, 116.1, 62.9.

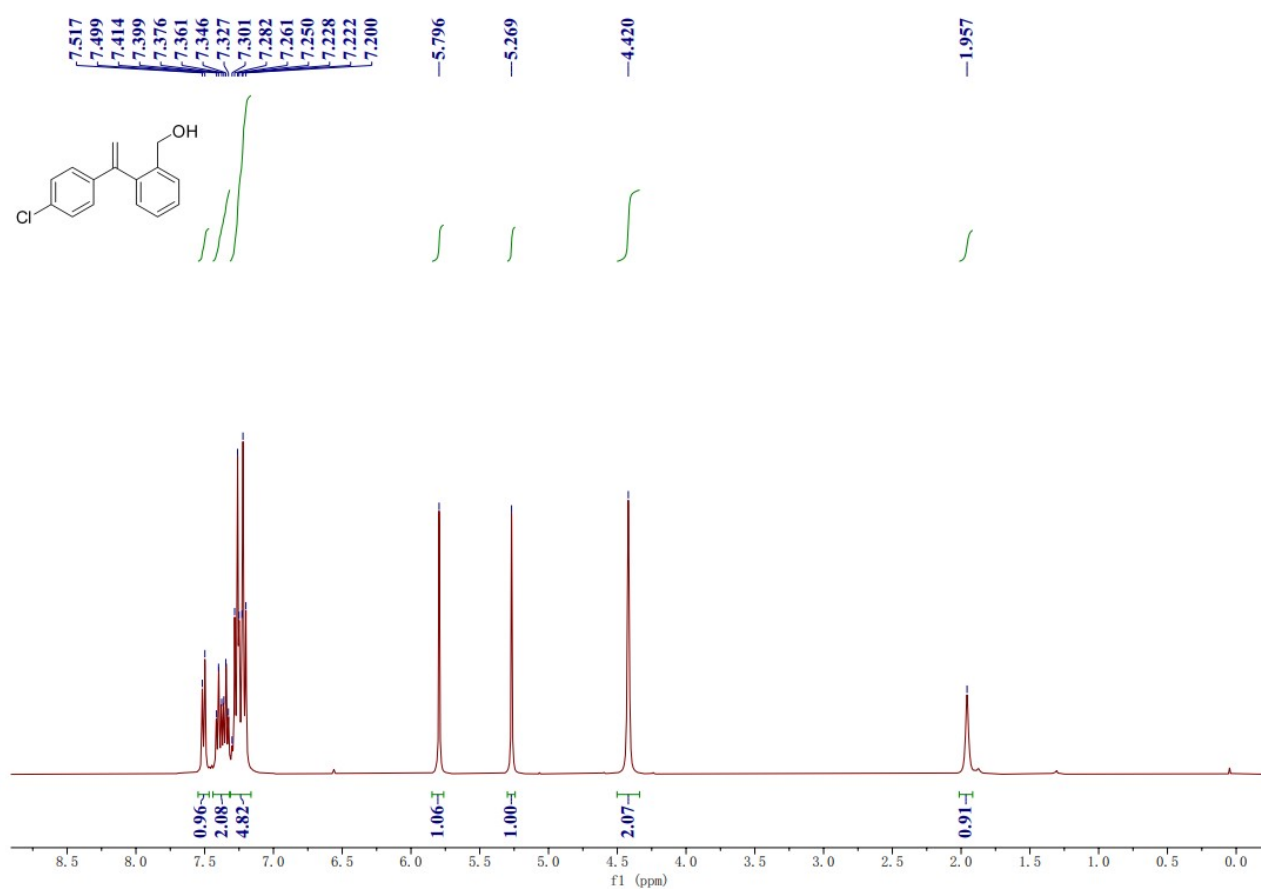

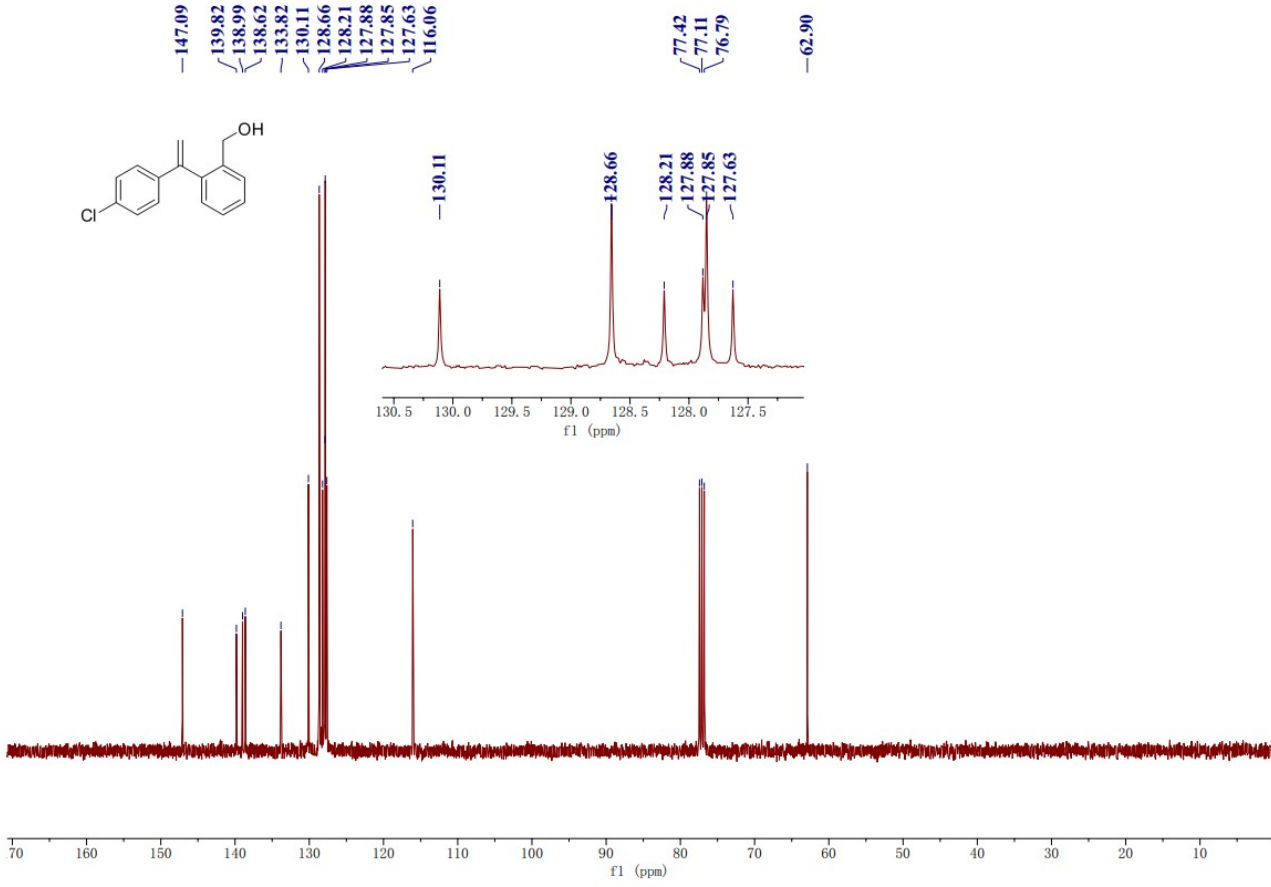

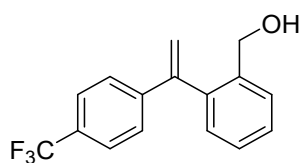

**(2-(1-(4-(trifluoromethyl)phenyl)vinyl)phenyl)methanol (1d)**

This is a known compound and its spectroscopic data are consistent with those in the previous literature.<sup>4</sup> CAS number: 345295-66-1. A colorless oil. 608 mg, 78% yield. <sup>1</sup>H NMR (CDCl<sub>3</sub>, TMS, 400 MHz) δ 7.56-7.52 (m, 3H), 7.43-7.33 (m, 4H), 7.24-7.22 (m, 1H), 5.88 (d, *J* = 1.2 Hz, 1H), 5.38 (d, *J* = 1.2 Hz, 1H), 4.44 (s, 2H), 1.49 (s, 1H). <sup>13</sup>C NMR (CDCl<sub>3</sub>, TMS, 100 MHz) δ 147.1, 144.0, 139.5, 138.6, 130.2, 129.8 (q, *J* = 32.4 Hz), 128.3, 127.9, 127.7, 126.8, 125.5 (q, *J* = 3.8 Hz), 123.8 (q, *J* = 271.0 Hz), 117.7, 62.9. <sup>19</sup>F NMR (CDCl<sub>3</sub>, CFCl<sub>3</sub>, 376 MHz) δ -62.6.

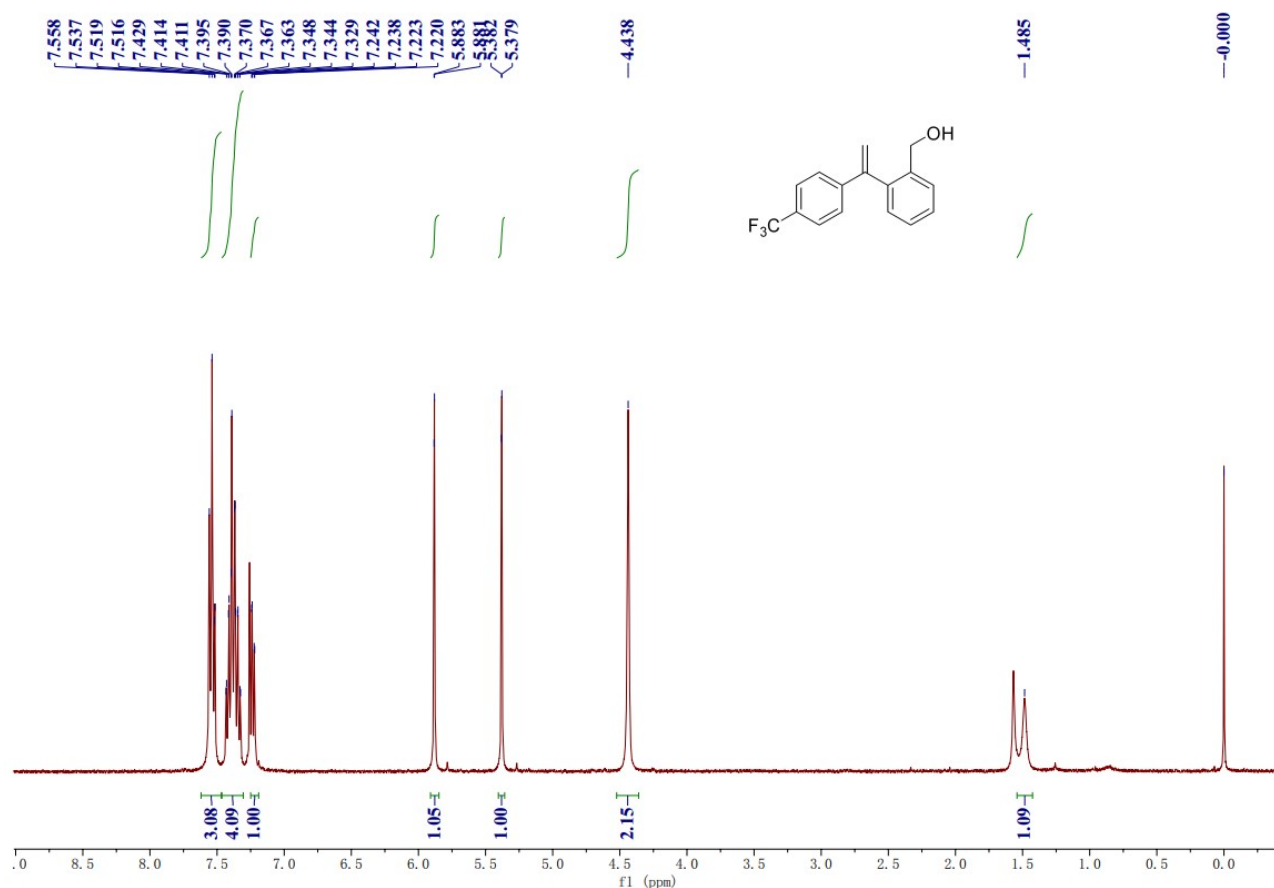



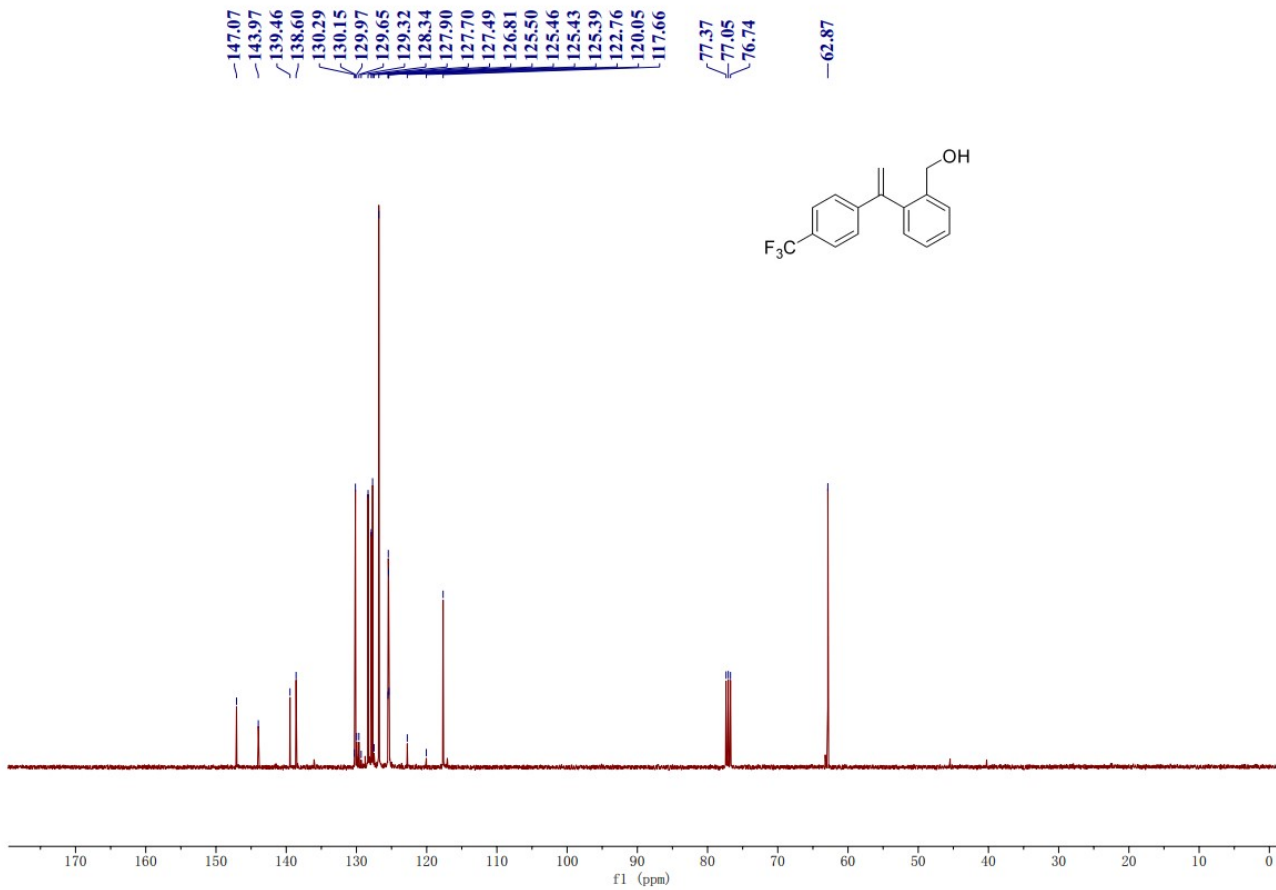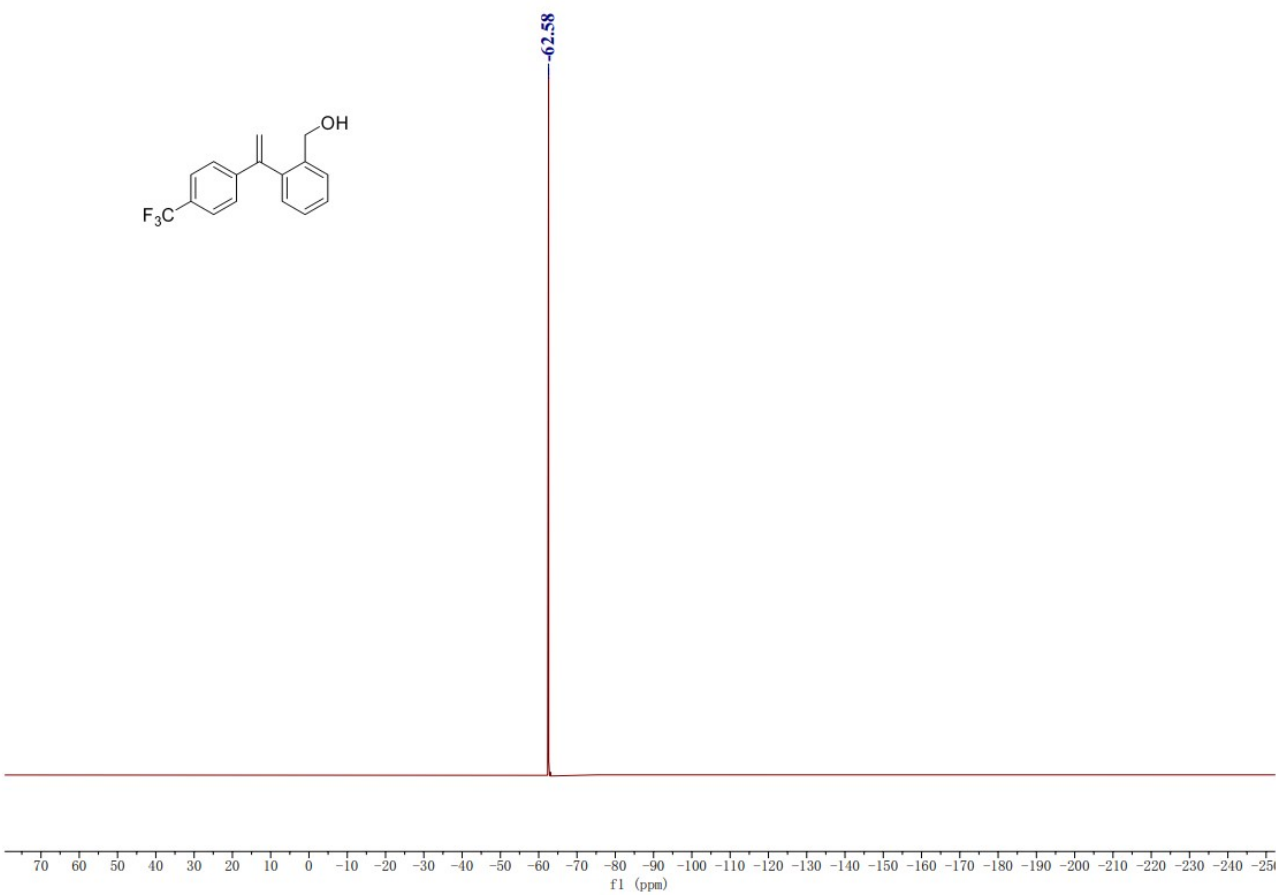

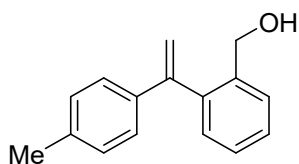

**(2-(1-(p-tolyl)vinyl)phenyl)methanol (1e)**

This is a known compound and its spectroscopic data are consistent with those in the previous literature.<sup>[1]</sup> CAS number: 2001050-08-2. A colorless oil. 704 mg, 80% yield. <sup>1</sup>H NMR (CDCl<sub>3</sub>, TMS, 400 MHz) δ 7.48 (dd, *J* = 7.6, 1.6 Hz, 1H), 7.40-7.32 (m, 2H), 7.26-7.24 (m, 1H), 7.17 (d, *J* = 8.4 Hz, 2H), 7.10 (d, *J* = 8.0 Hz, 2H), 5.76 (d, *J* = 1.4 Hz, 1H), 5.19 (d, *J* = 1.4 Hz, 1H), 4.43 (s, 2H), 2.33 (s, 3H), 1.45 (s, 1H). <sup>13</sup>C NMR (CDCl<sub>3</sub>, TMS, 100 MHz) δ 148.1, 140.7, 138.6, 137.9, 137.8, 130.2, 129.2, 128.1, 128.0, 127.6, 126.4, 114.7, 63.3, 21.1.

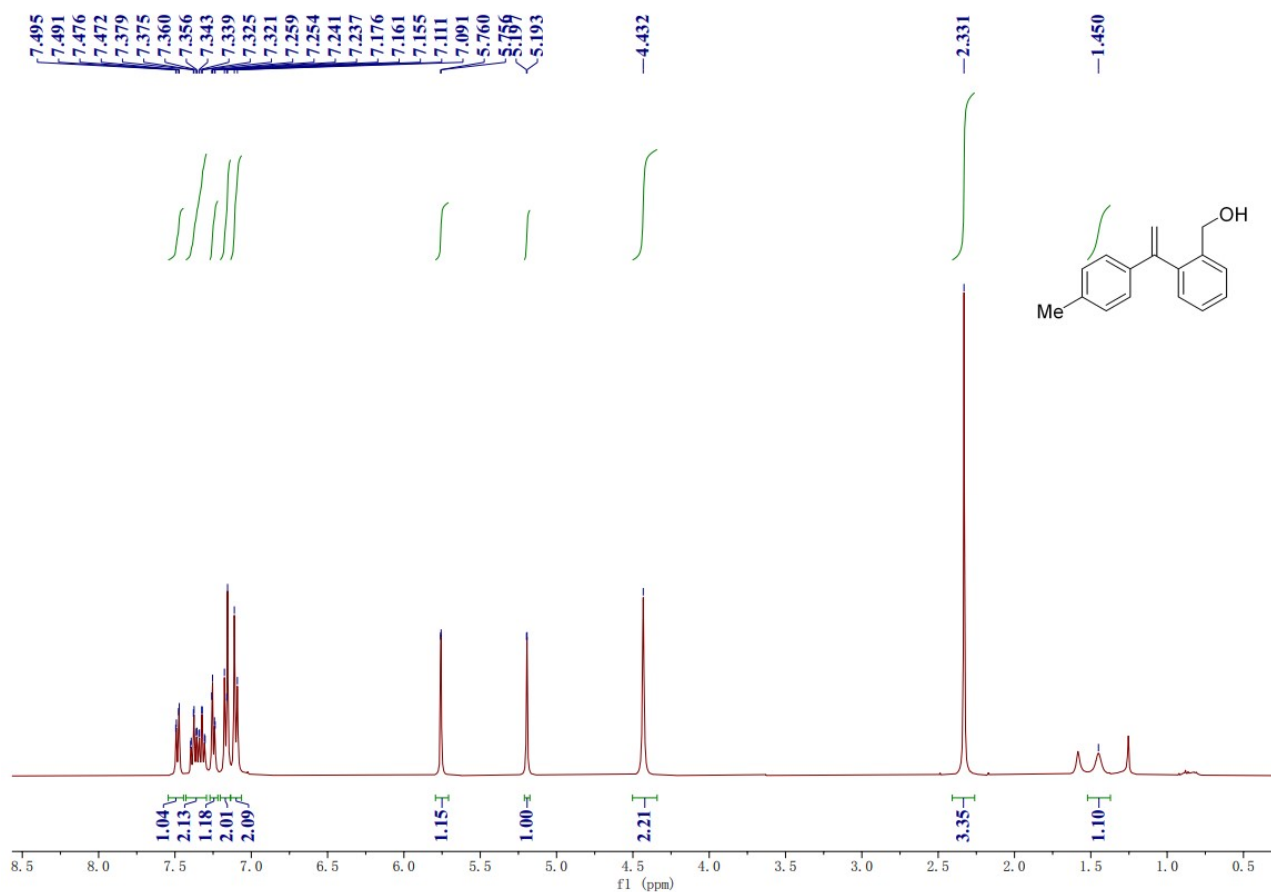

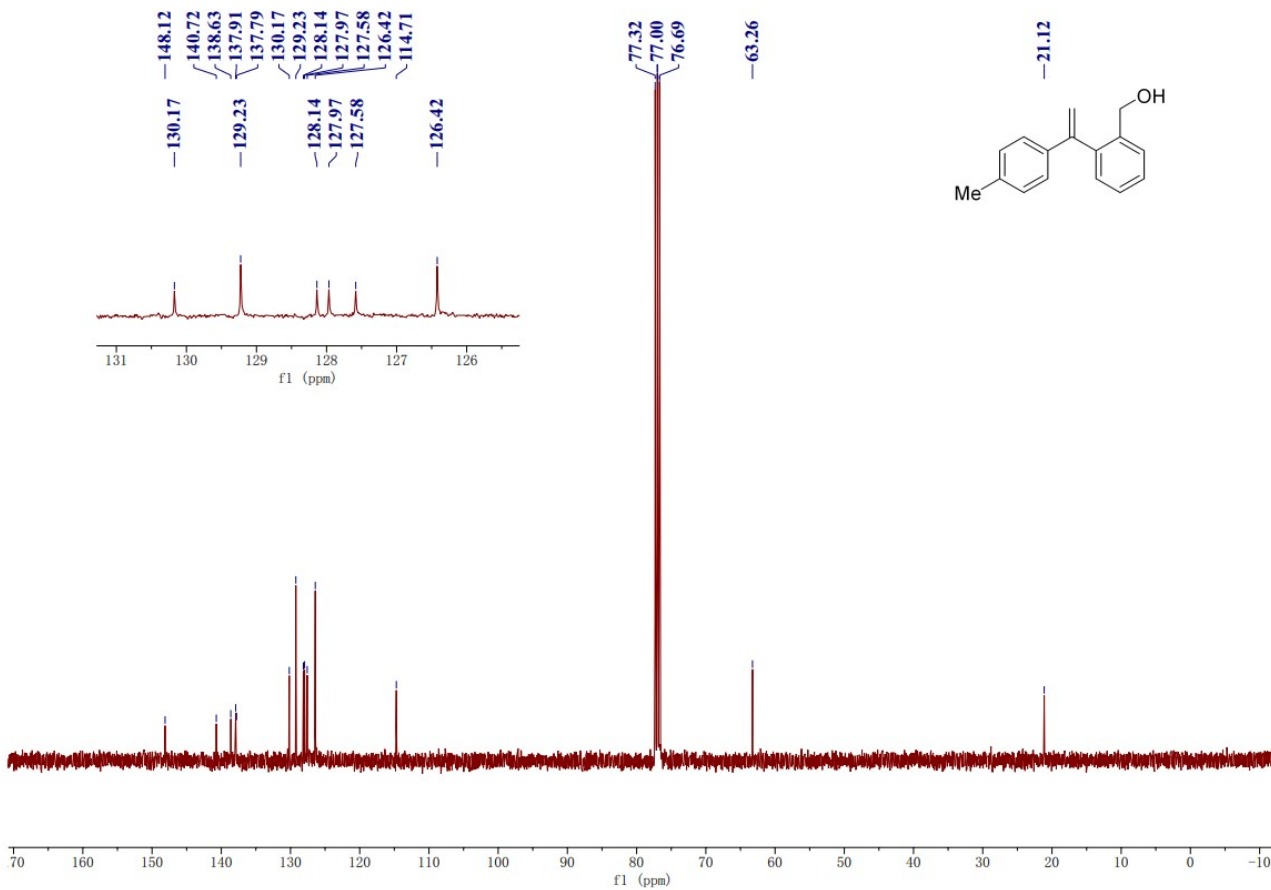

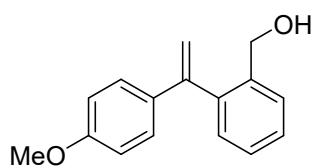

**(2-(1-(4-methoxyphenyl)vinyl)phenyl)methanol (1f)**

This is a known compound and its spectroscopic data are consistent with those in the previous literature.<sup>6</sup> CAS number: 2001050-09-3. A white solid. 765 mg, 87% yield. <sup>1</sup>H NMR (CDCl<sub>3</sub>, TMS, 400 MHz) δ 7.48 (d, *J* = 7.6 Hz, 1H), 7.39-7.30 (m, 2H), 7.25-7.19 (m, 3H), 6.82 (d, *J* = 8.4 Hz, 2H), 5.70 (s, 1H), 5.14 (s, 1H), 4.44 (s, 2H), 3.79 (s, 3H), 1.65 (br, 1H). <sup>13</sup>C NMR (CDCl<sub>3</sub>, TMS, 100 MHz) δ 159.5, 147.6, 140.7, 138.7, 133.2, 130.1, 128.0, 127.9, 127.8, 127.6, 113.9, 113.7, 63.2, 55.3.

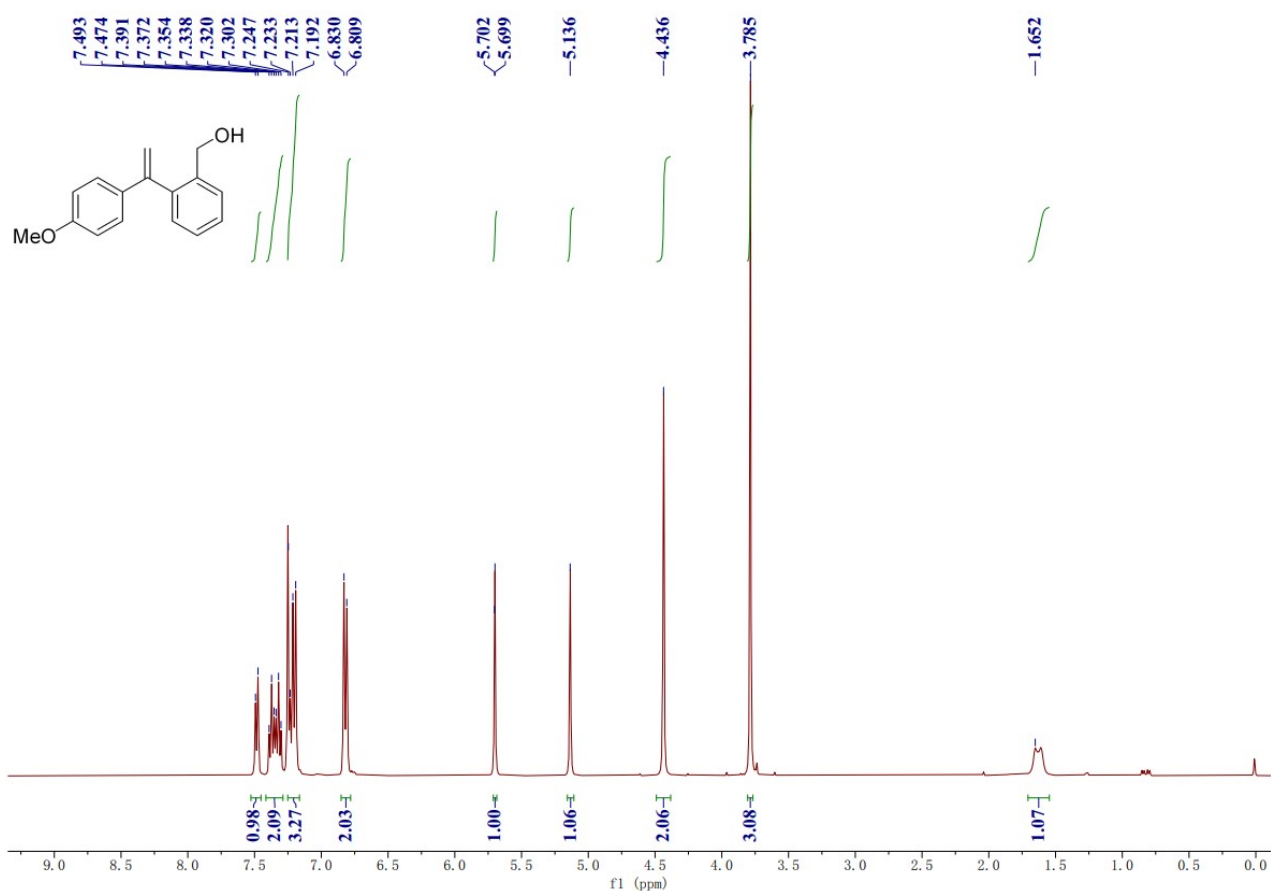

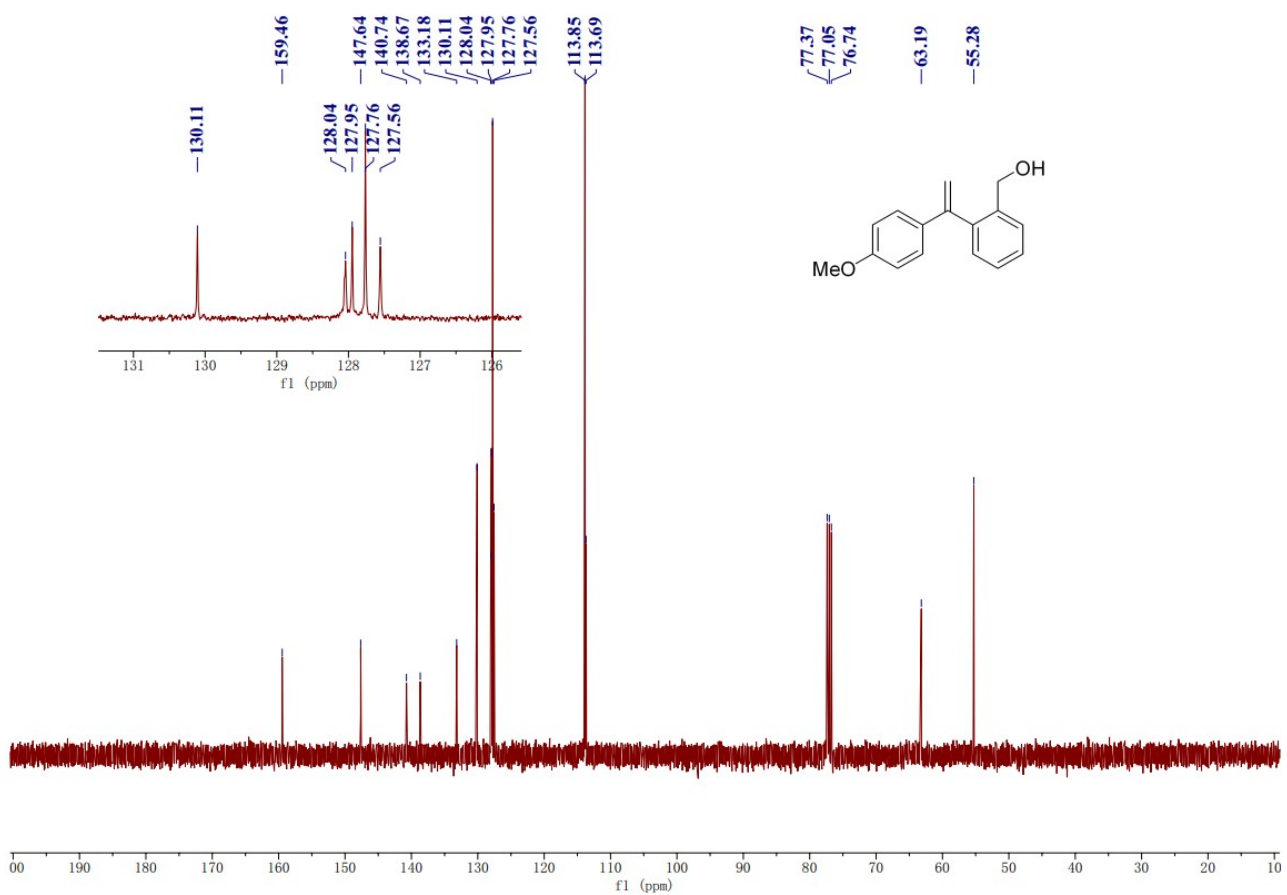

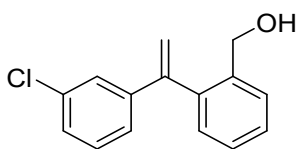

**(2-(1-(3-chlorophenyl)vinyl)phenyl)methanol (1g)**

A colorless oil, 450 mg, 84% yield.  $^1\text{H}$  NMR ( $\text{CDCl}_3$ , TMS, 400 MHz)  $\delta$  7.48 (d,  $J = 7.6$  Hz, 1H), 7.39-7.29 (m, 2H), 7.26-7.17 (m, 4H), 7.10 (d,  $J = 7.6$  Hz, 1H), 5.78 (s, 1H), 5.27 (s, 1H), 4.40 (d,  $J = 4.4$  Hz, 2H), 1.77 (br, 1H).  $^{13}\text{C}$  NMR ( $\text{CDCl}_3$ , TMS, 100 MHz)  $\delta$  147.0, 142.4, 139.6, 138.6, 134.5, 130.2, 129.7, 128.3, 128.0, 127.9, 127.7, 126.5, 124.8, 116.9, 63.0. IR (acetone)  $\nu$  3376, 3054, 2971, 1597, 1493, 1444, 1189, 1073, 904, 695  $\text{cm}^{-1}$ . HRMS (EI) Calcd. for  $\text{C}_{21}\text{H}_{18}\text{O}$  ( $\text{M}^+$ ): 244.0649, Found: 244.0647.

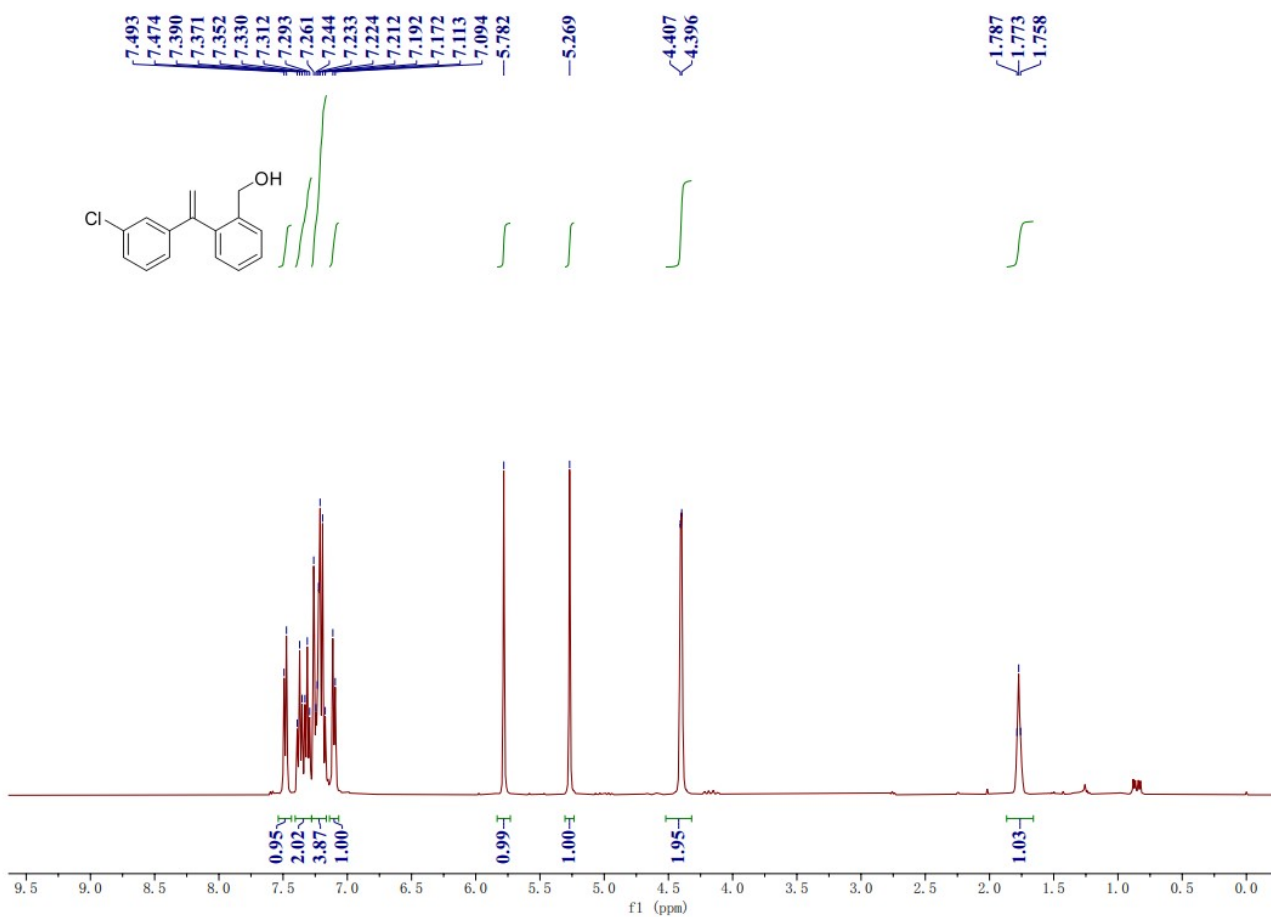

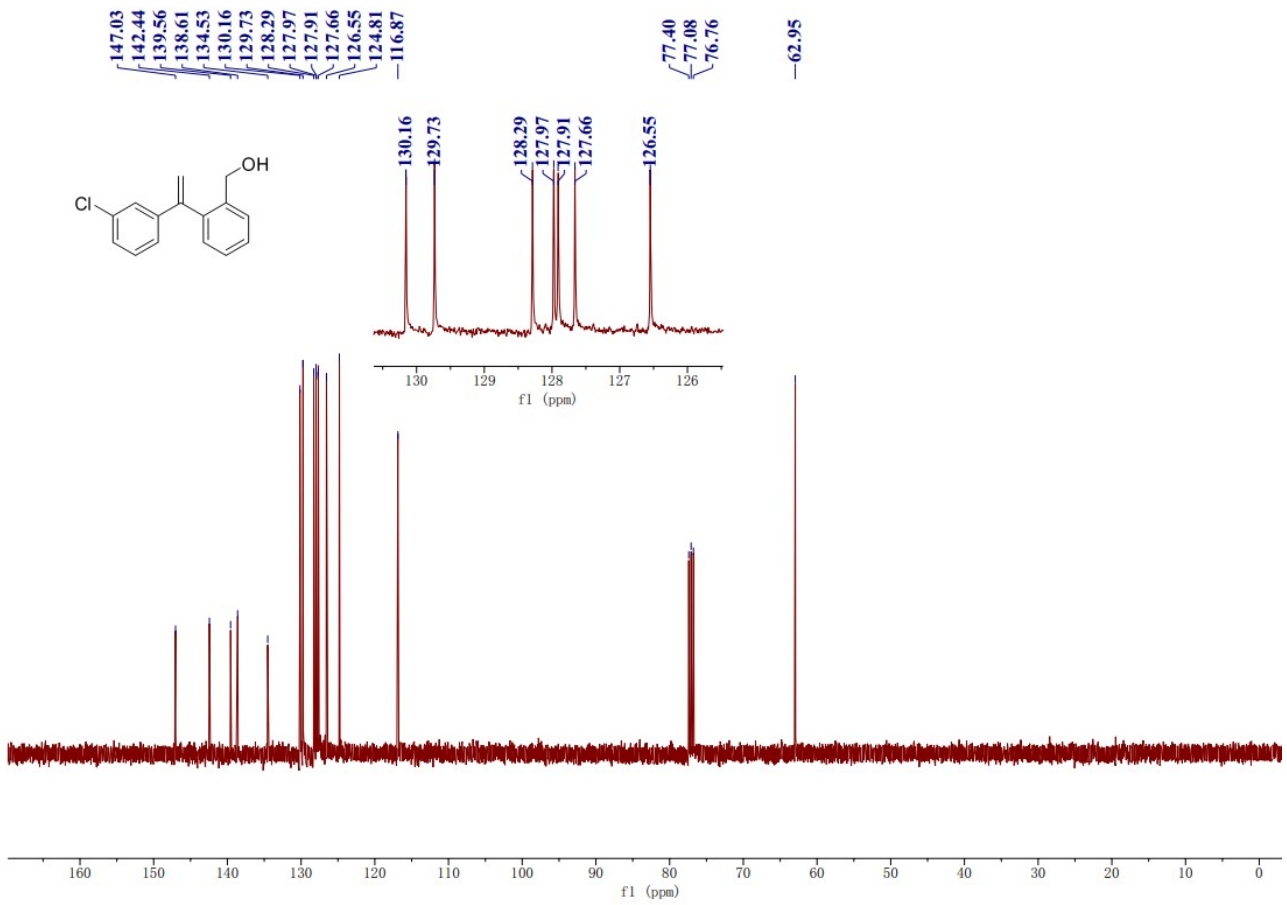

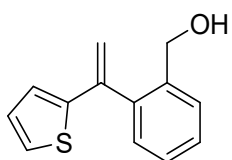

### (2-(1-(thiophen-2-yl)vinyl)phenyl)methanol (1h)

This is a known compound and its spectroscopic data are consistent with those in the previous literature.<sup>1</sup> CAS number: 2712651-65-3. A white solid, 810 mg, 81% yield. <sup>1</sup>H NMR (CDCl<sub>3</sub>, TMS, 400 MHz) δ 7.51 (d, *J* = 7.6 Hz, 1H), 7.41-7.36 (m, 1H), 7.33-7.29 (m, 1H), 7.25 (d, *J* = 7.4, 1H), 7.20 (d, *J* = 5.2, 1H), 6.90-6.88 (m, 1H), 6.61-6.60 (m, 1H), 5.76 (s, 1H), 5.06 (s, 1H), 4.56 (s, 2H), 1.75 (s, 1H). <sup>13</sup>C NMR (CDCl<sub>3</sub>, TMS, 100 MHz) δ 145.2, 141.7, 139.6, 138.7, 129.7, 128.3, 128.0, 127.5, 126.2, 125.4, 114.0, 63.0.

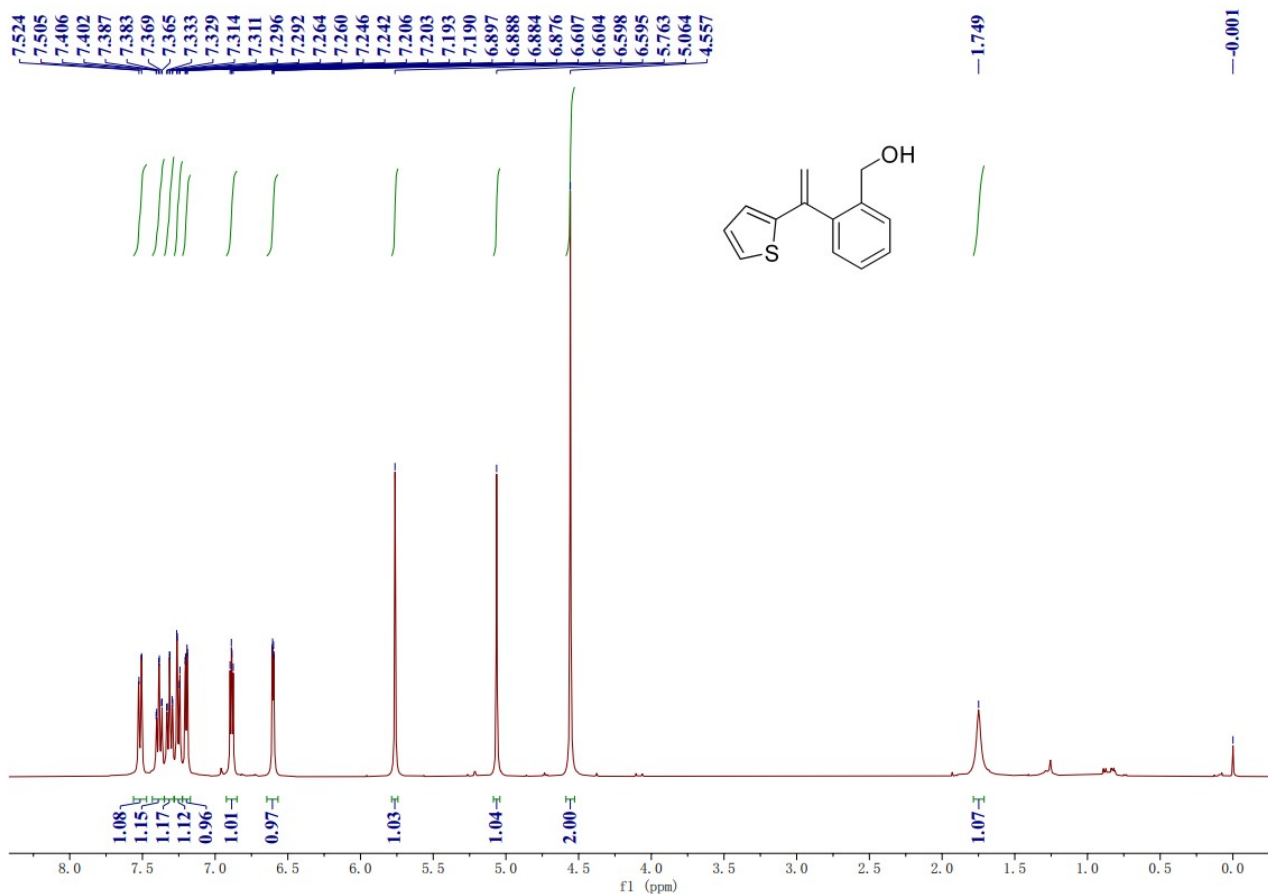



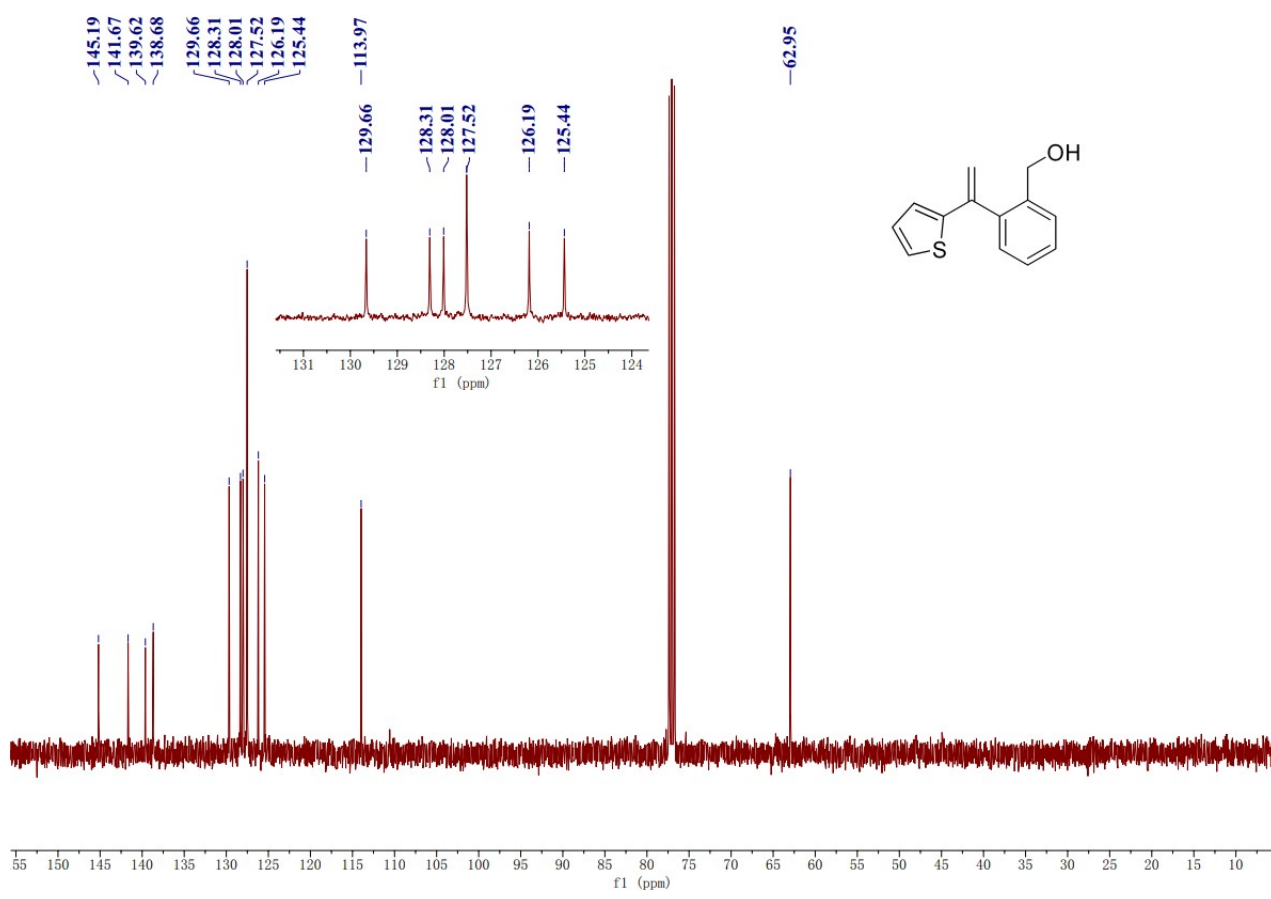

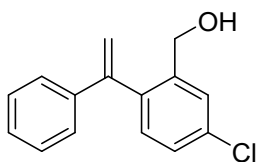

**(5-chloro-2-(1-phenylvinyl)phenyl)methanol (1i)**

A colorless oil, 572 mg, 86% yield.  $^1\text{H}$  NMR ( $\text{CDCl}_3$ , TMS, 400 MHz)  $\delta$  7.50 (d,  $J = 2.3$  Hz, 1H), 7.29-7.22 (m, 6H), 7.17 (d,  $J = 8.1$  Hz, 1H), 5.78 (s, 1H), 5.21 (s, 1H), 4.40 (d,  $J = 4.1$  Hz, 2H), 1.75 (br, 1H).  $^{13}\text{C}$  NMR ( $\text{CDCl}_3$ , TMS, 100 MHz)  $\delta$  147.0, 142.4, 139.6, 138.6, 134.5, 130.2, 129.7, 128.3, 128.0, 127.9, 127.7, 126.5, 124.8, 116.9, 77.4, 77.1, 76.8, 63.0. IR (acetone)  $\nu$  3382, 3056, 2973, 1594, 1494, 1478, 1403, 1190, 908, 879  $\text{cm}^{-1}$ . HRMS (EI) Calcd. for  $\text{C}_{15}\text{H}_{13}\text{ClO}$  ( $\text{M}^+$ ): 244.0649, Found: 244.0643.

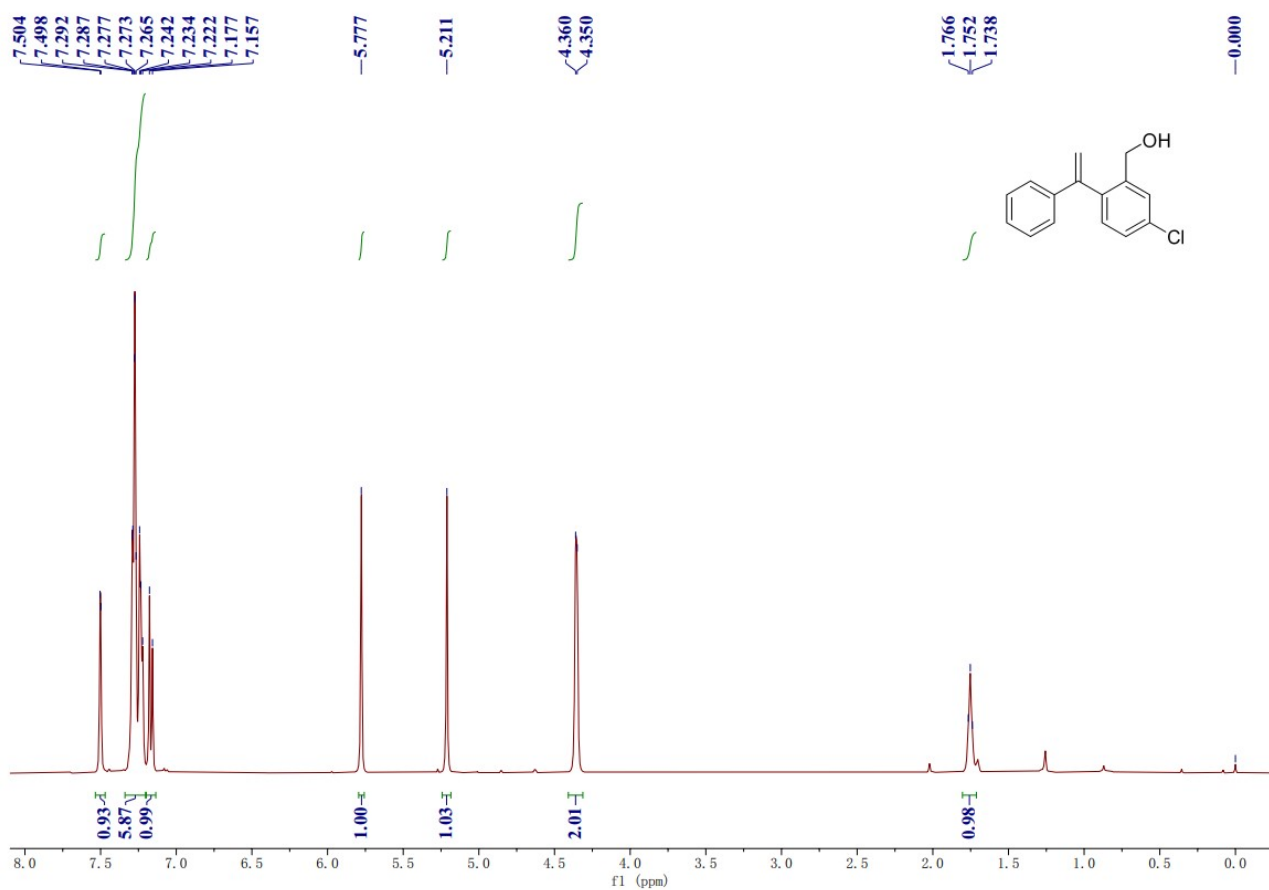

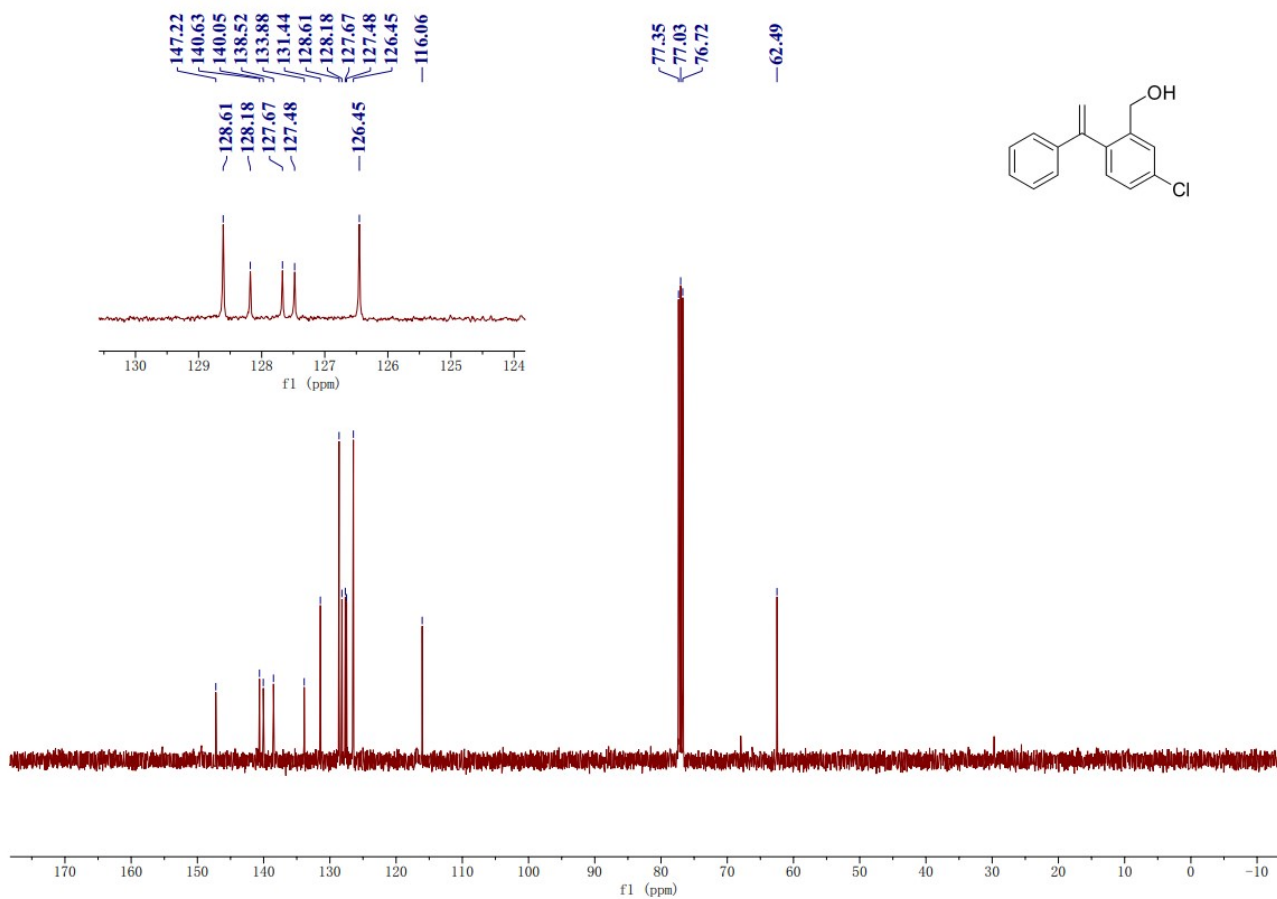

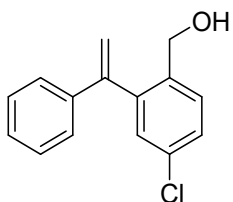

**(4-chloro-2-(1-phenylvinyl)phenyl)methanol (1j)**

This is a known compound and its spectroscopic data are consistent with those in the previous literature.<sup>6</sup> CAS number: 2191304-69-3. A colorless oil, 491 mg, 76% yield. <sup>1</sup>H NMR (CDCl<sub>3</sub>, TMS, 400 MHz) δ 7.42 (d, *J* = 8.2 Hz, 1H), 7.35-7.23 (m, 7H), 5.79 (s, 1H), 5.24 (s, 1H), 4.35 (s, 2H), 1.72 (s, 1H). <sup>13</sup>C NMR (CDCl<sub>3</sub>, TMS, 100 MHz) δ 147.1, 141.9, 139.9, 137.2, 133.1, 129.9, 129.3, 128.6, 128.2, 128.0, 126.5, 116.3, 62.4.

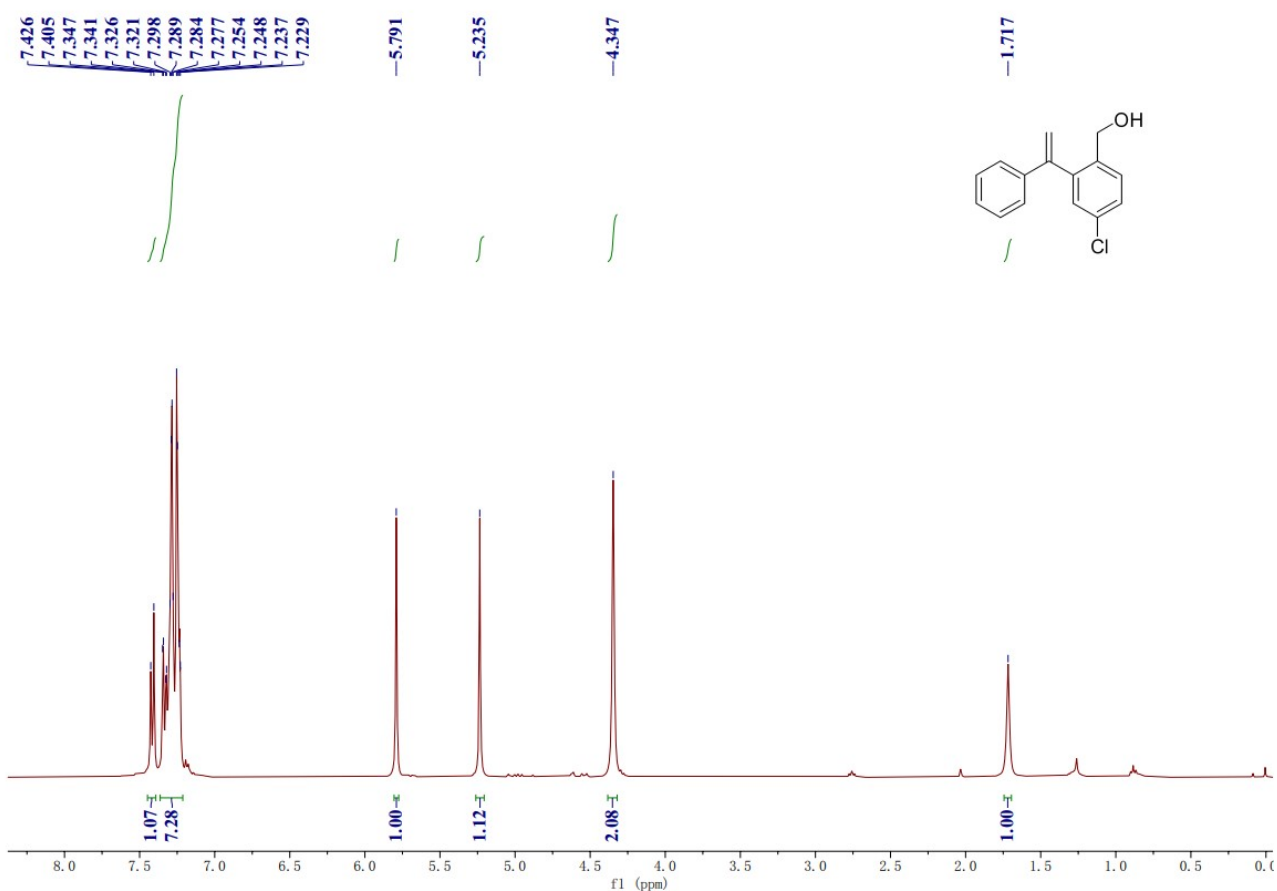

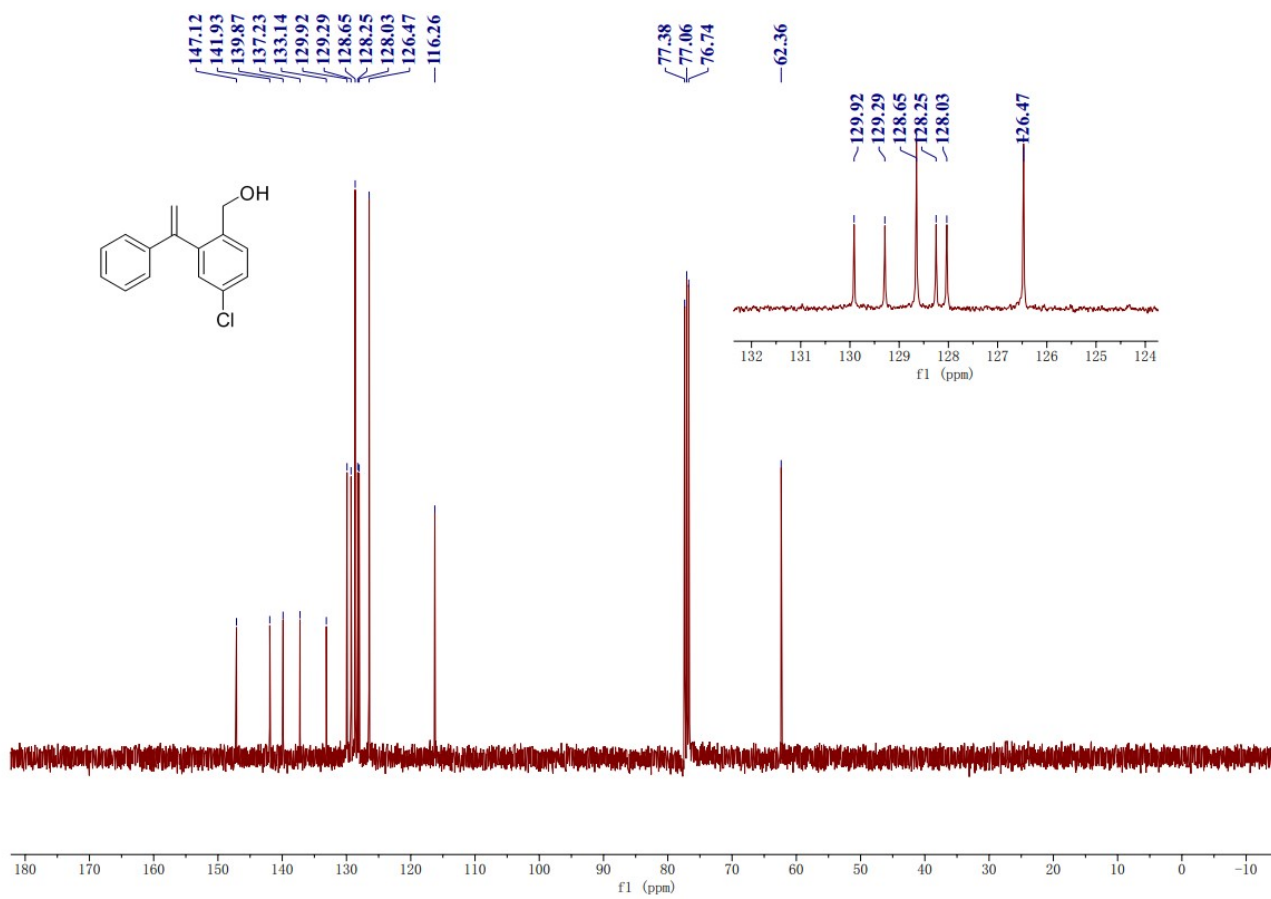

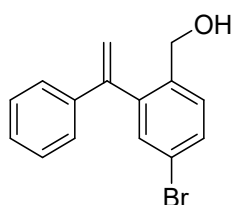

### (4-bromo-2-(1-phenylvinyl)phenyl)methanol (1k)

This is a known compound and its spectroscopic data are consistent with those in the previous literature.<sup>4</sup> CAS number: 2821886-40-0. A colorless oil, 481 mg, 73% yield. <sup>1</sup>H NMR (CDCl<sub>3</sub>, TMS, 400 MHz) δ 7.49 (d, *J* = 8.2 Hz, 1H), 7.40-7.35 (m, 2H), 7.30-7.22 (m, 5H), 5.78 (s, 1H), 5.23 (s, 1H), 4.34 (s, 2H), 1.50 (br, 1H). <sup>13</sup>C NMR (CDCl<sub>3</sub>, TMS, 100 MHz) δ 146.8, 142.0, 139.6, 137.4, 132.5, 130.7, 129.3, 128.4, 128.0, 126.2, 121.0, 116.0, 62.2.

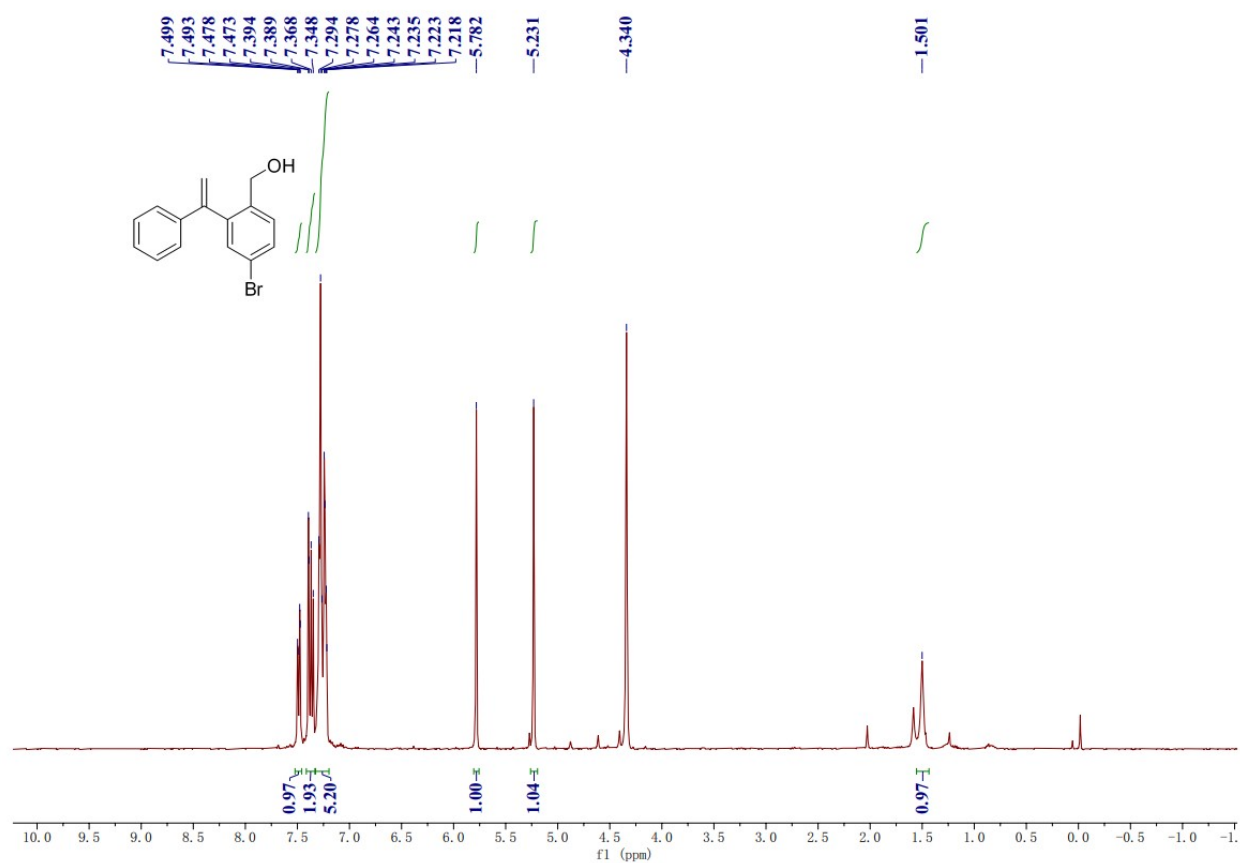

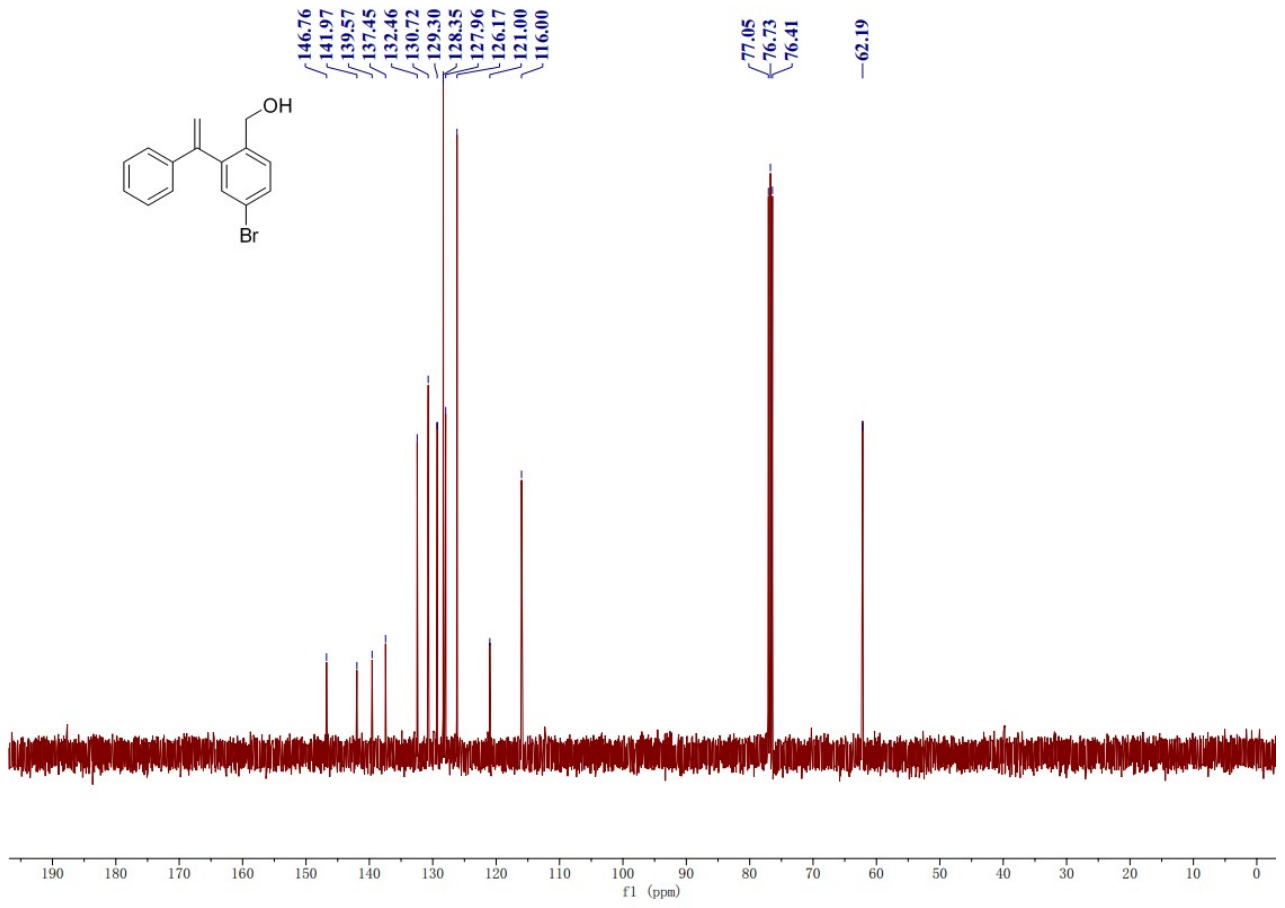

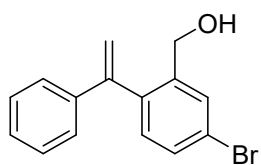

**(5-bromo-2-(1-phenylvinyl)phenyl)methanol (11)**

A colorless oil, 451 mg, 70% yield.  $^1\text{H}$  NMR ( $\text{CDCl}_3$ , TMS, 400 MHz)  $\delta$  7.67 (d,  $J = 2.2$  Hz, 1H), 7.45 (dd,  $J = 8.1, 2.2$  Hz, 1H), 7.30-7.23 (m, 5H), 7.12 (d,  $J = 8.0$  Hz, 1H), 5.79 (s, 1H), 5.22 (s, 1H), 4.38 (s, 2H), 1.67-1.63 (br, 1H).  $^{13}\text{C}$  NMR ( $\text{CDCl}_3$ , TMS, 100 MHz)  $\delta$  147.2, 140.8, 139.9, 139.0, 131.7, 130.6, 130.4, 128.6, 128.2, 126.4, 122.0, 116.0, 62.4. IR (acetone)  $\nu$  3330, 3081, 2926, 1613, 1493, 1477, 1397, 908, 864, 706  $\text{cm}^{-1}$ . HRMS (EI) Calcd. for  $\text{C}_{15}\text{H}_{13}\text{BrO}$  ( $\text{M}^+$ ): 288.0144, Found: 288.0138.

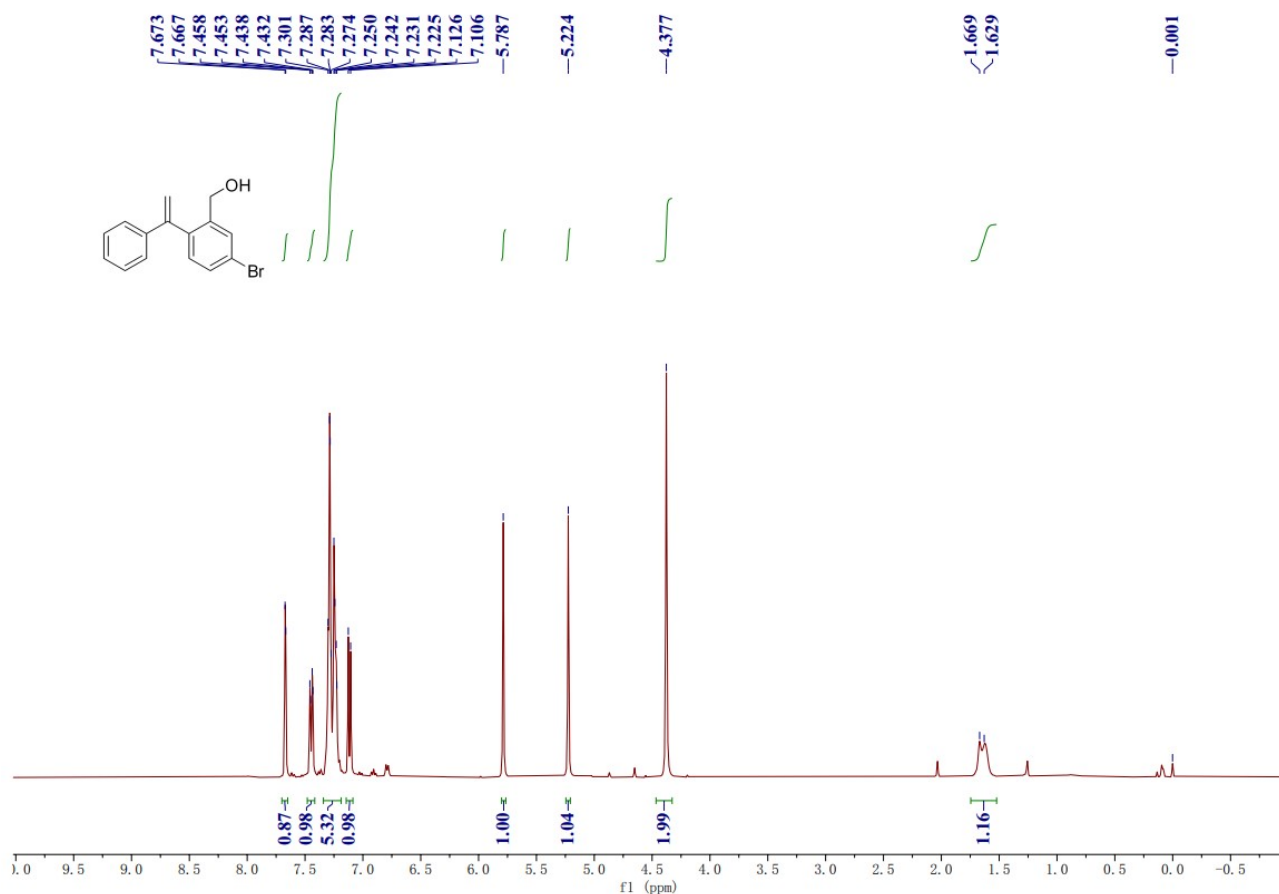



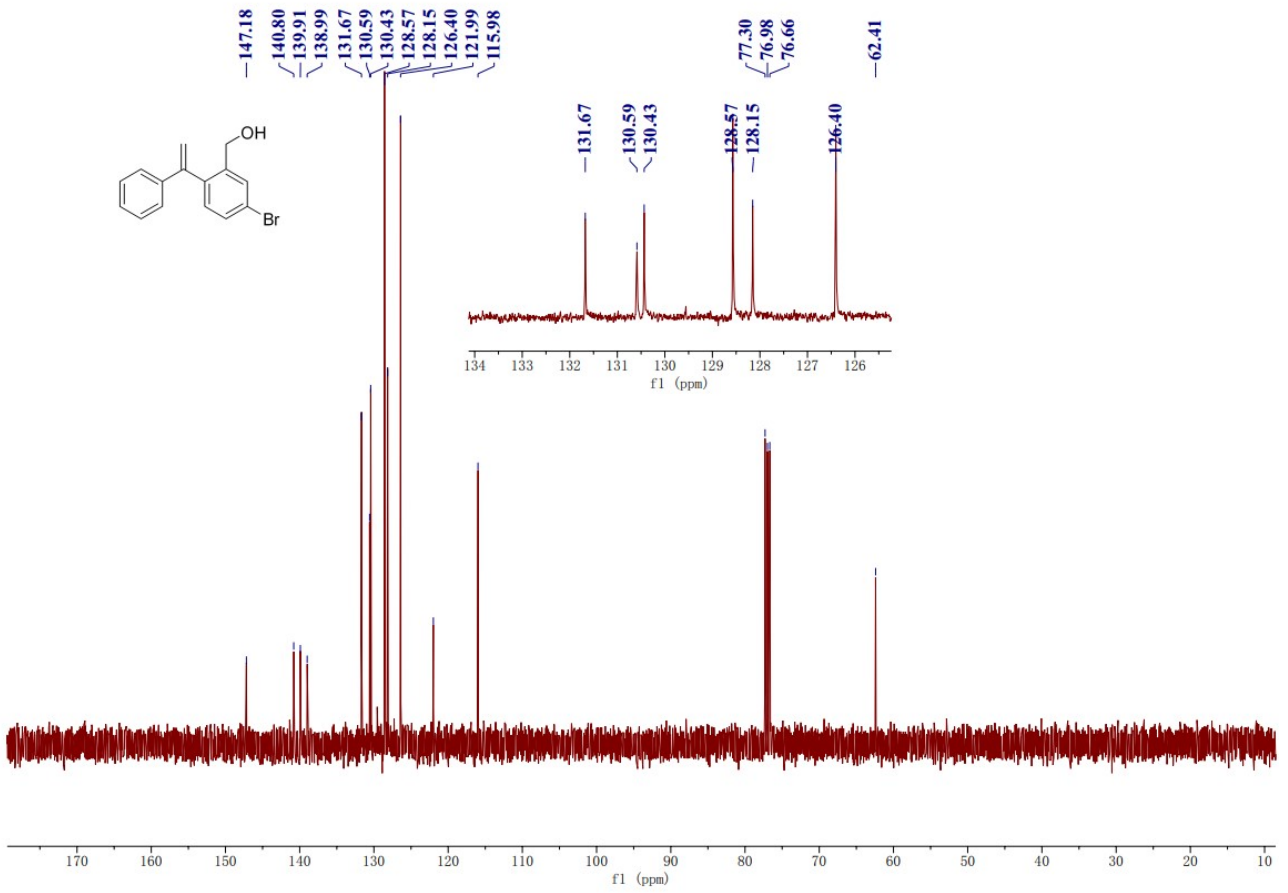

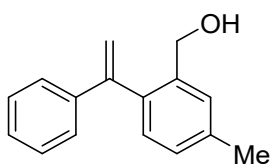

**(5-methyl-2-(1-phenylvinyl)phenyl)methanol (1m)**

This is a known compound and its spectroscopic data are consistent with those in the previous literature.<sup>4</sup> CAS number: 2821886-39-7. A colorless oil, 231 mg, 82% yield. <sup>1</sup>H NMR (CDCl<sub>3</sub>, TMS, 400 MHz) δ 7.39 (d, *J* = 7.8 Hz, 1H), 7.32-7.31 (m, 5H), 7.21 (dd, *J* = 7.8, 1.9 Hz, 1H), 7.11 (d, *J* = 1.9 Hz, 1H), 5.81 (d, *J* = 1.4 Hz, 1H), 5.27 (d, *J* = 1.4 Hz, 1H), 4.41 (s, 2H), 2.40 (s, 3H), 1.67 (br, 1H). <sup>13</sup>C NMR (CDCl<sub>3</sub>, TMS, 100 MHz) δ 148.4, 140.8, 140.5, 137.3, 135.8, 130.9, 128.7, 128.5, 128.3, 128.0, 126.6, 115.5, 63.0, 21.1.

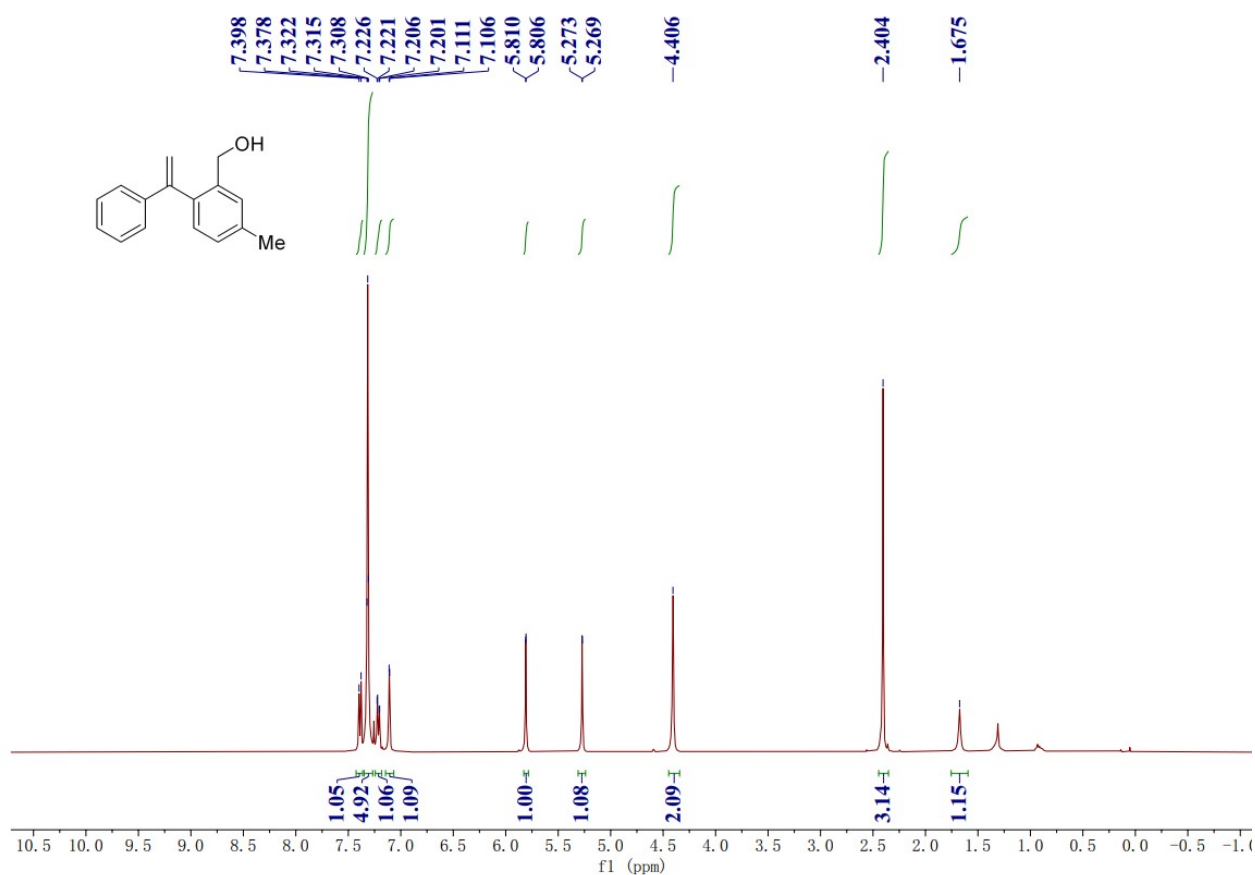

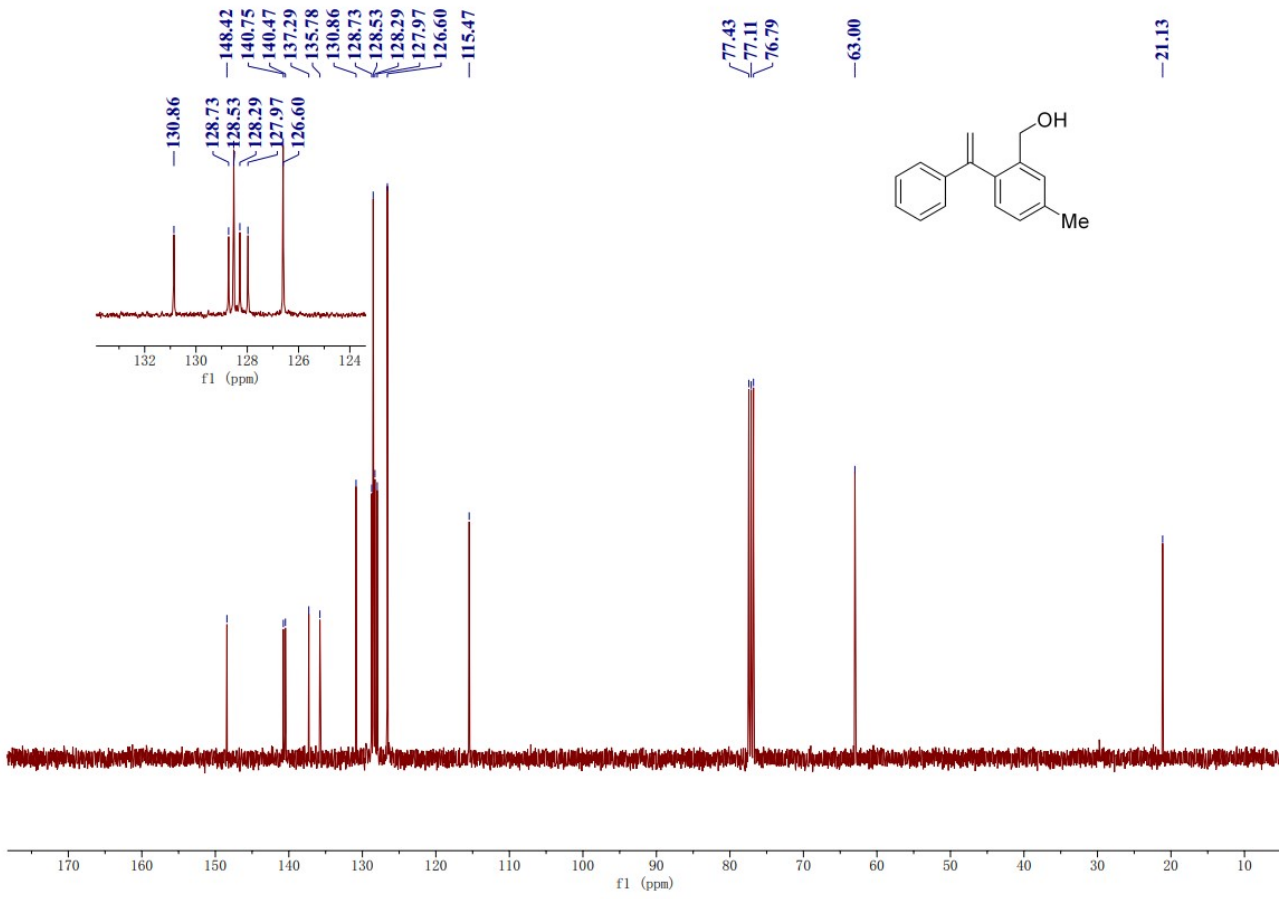

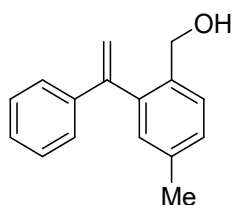

**(4-methyl-2-(1-phenylvinyl)phenyl)methanol (1n)**

A colorless oil, 161 mg, 78% yield.  $^1\text{H}$  NMR ( $\text{CDCl}_3$ , TMS, 400 MHz)  $\delta$  7.32-7.26 (m, 6H), 7.17-7.16 (m, 2H), 5.78 (d,  $J = 1.4$  Hz, 1H), 5.25 (d,  $J = 1.4$  Hz, 1H), 4.41 (s, 2H), 2.42 (s, 3H), 1.56 (br, 1H).  $^{13}\text{C}$  NMR ( $\text{CDCl}_3$ , TMS, 100 MHz)  $\delta$  148.3, 140.9, 138.4, 137.8, 137.6, 130.2, 128.9, 128.5, 128.3, 127.9, 126.6, 115.5, 63.2, 21.2. IR (acetone)  $\nu$  3351, 3052, 2923, 1581, 1493, 1445, 1027, 906, 819, 780  $\text{cm}^{-1}$ . HRMS (EI) Calcd. for  $\text{C}_{16}\text{H}_{16}\text{O}$  ( $\text{M}^+$ ): 244.1196, Found: 244.1198.

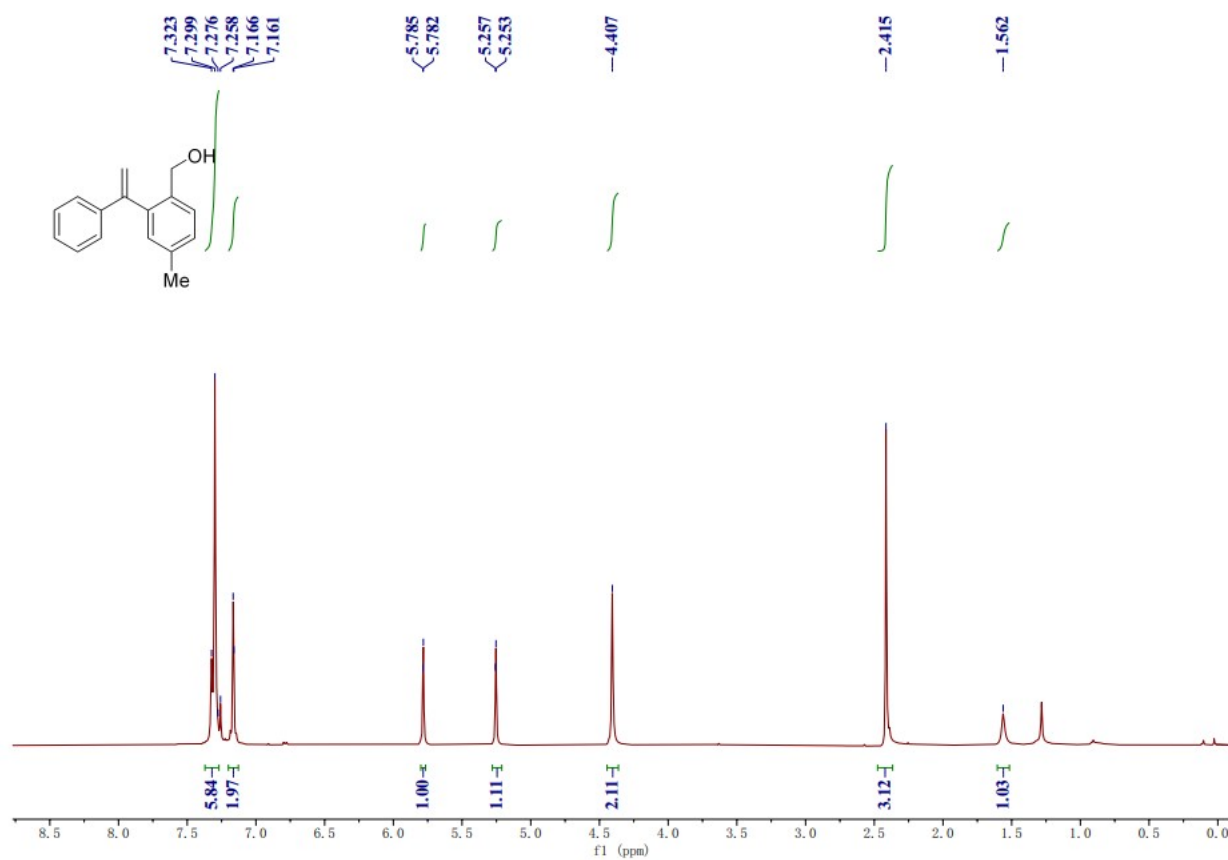

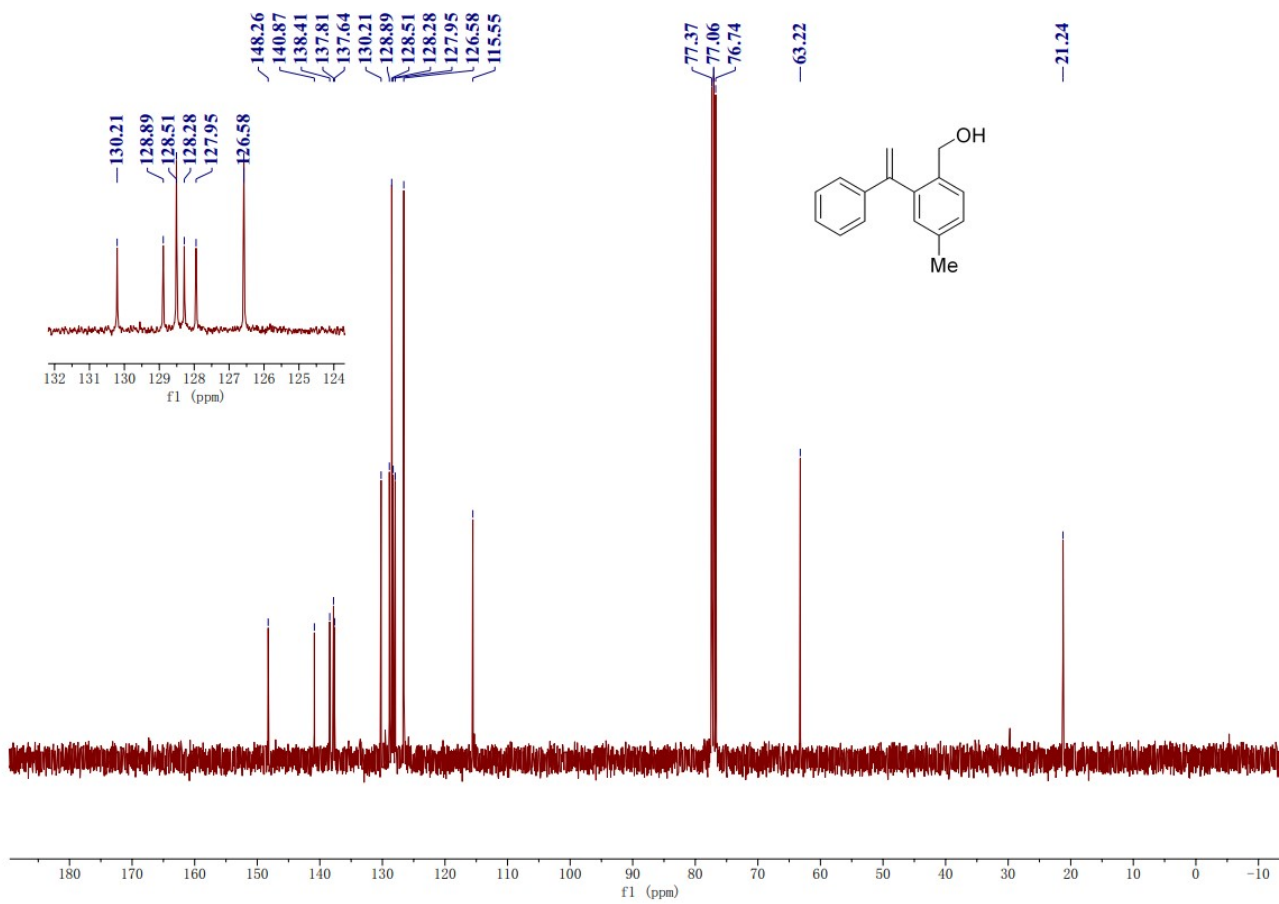

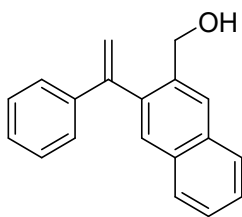

**(3-(1-phenylvinyl)naphthalen-2-yl)methanol (1o)**

A white solid, M.P.: 110-112 °C, 332 mg, 87% yield. <sup>1</sup>H NMR (CDCl<sub>3</sub>, TMS, 400 MHz) δ 7.95 (s, 1H), 7.90-7.85 (m, 2H), 7.79 (s, 1H), 7.53-7.51 (m, 2H), 7.31 (s, 5H), 5.86 (s, 1H), 5.39 (s, 1H), 4.54 (s, 2H), 1.61 (br, 1H). <sup>13</sup>C NMR (CDCl<sub>3</sub>, TMS, 100 MHz) δ 148.2, 140.4, 138.8, 137.8, 133.3, 133.0, 130.3, 128.3, 128.2, 128.1, 128.0, 127.7, 127.6, 126.3, 126.2, 126.0, 124.2, 116.2, 63.2. IR (acetone) ν 3367, 3056, 2925, 1600, 1508, 1492, 1444, 1039, 880, 699 cm<sup>-1</sup>. HRMS (EI) Calcd. for C<sub>19</sub>H<sub>16</sub>O (M<sup>+</sup>): 260.1196, Found: 260.1202.

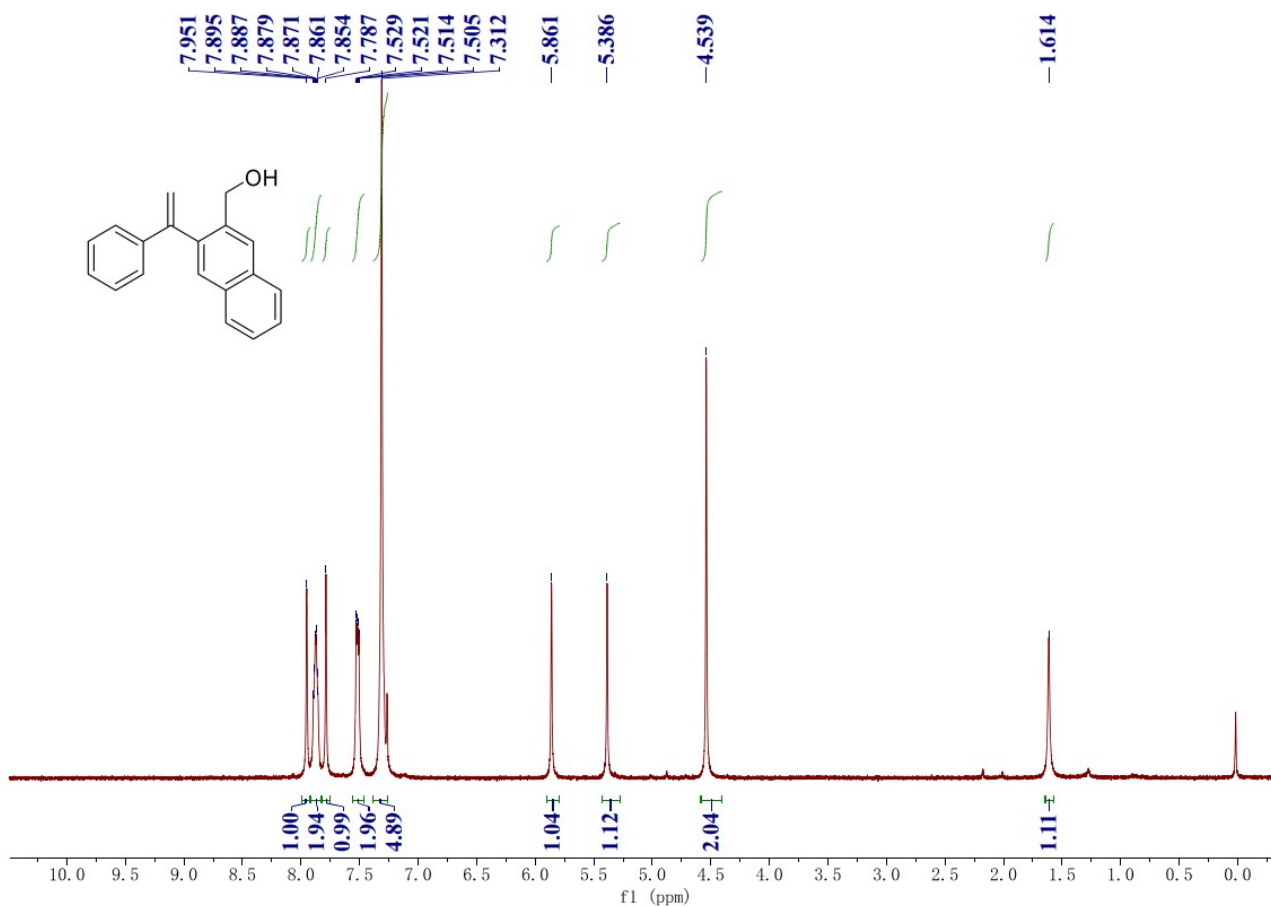

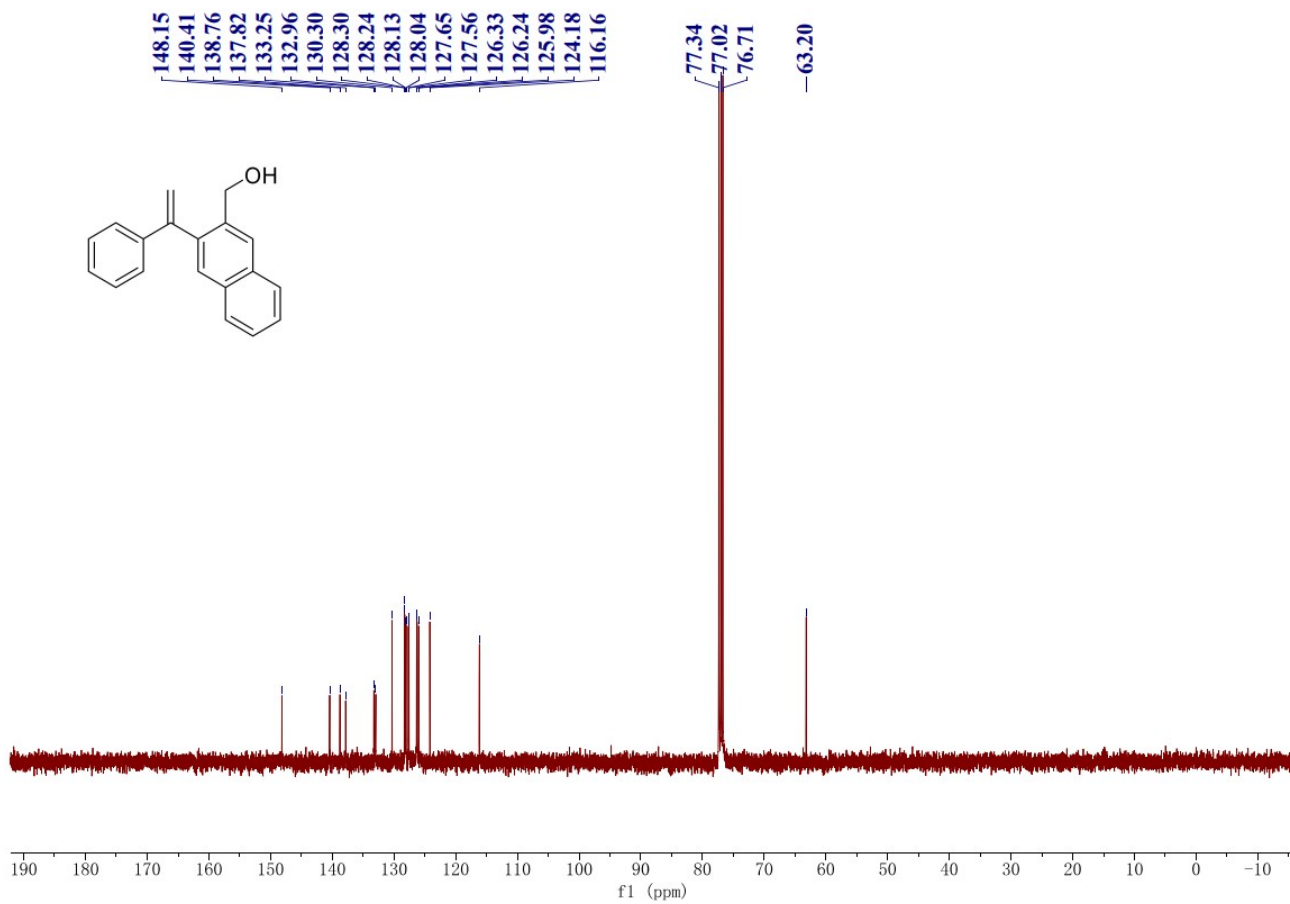

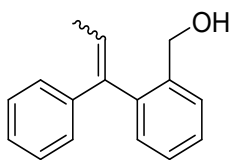

**(2-(1-phenylprop-1-en-1-yl)phenyl)methanol (1p)**

A yellow oil, 107 mg, 63% yield.  $^1\text{H}$  NMR ( $\text{CDCl}_3$ , TMS, 400 MHz)  $\delta$  7.56 (dd,  $J = 6.8, 2.1$  Hz, 0.8H), 7.42-7.17 (m, 8.3H), 6.37 (q,  $J = 7.0$  Hz, 0.8H), 5.88 (q,  $J = 7.2$  Hz, 0.21H), 4.44-4.20 (m, 2H), 1.95 (d,  $J = 7.2$  Hz, 0.56H), 1.65 (d,  $J = 6.8$  Hz, 3.1H), 1.47 (br, 0.26H).  $^{13}\text{C}$  NMR ( $\text{CDCl}_3$ , TMS, 100 MHz)  $\delta$  143.0, 141.3, 141.2, 140.4, 139.9, 139.1, 138.5, 137.9, 130.4, 129.3, 128.4, 128.2, 128.1, 127.9, 127.6, 127.54, 127.46, 127.4, 127.0, 126.0, 124.8, 63.3, 63.0, 15.6, 15.5. IR (acetone)  $\nu$  3333, 3058, 2932, 1495, 1445, 1379, 1198, 1030, 870, 698  $\text{cm}^{-1}$ . HRMS (EI) Calcd. for  $\text{C}_{16}\text{H}_{16}\text{O}$  ( $\text{M}^+$ ): 224.1196, Found: 224.1196.

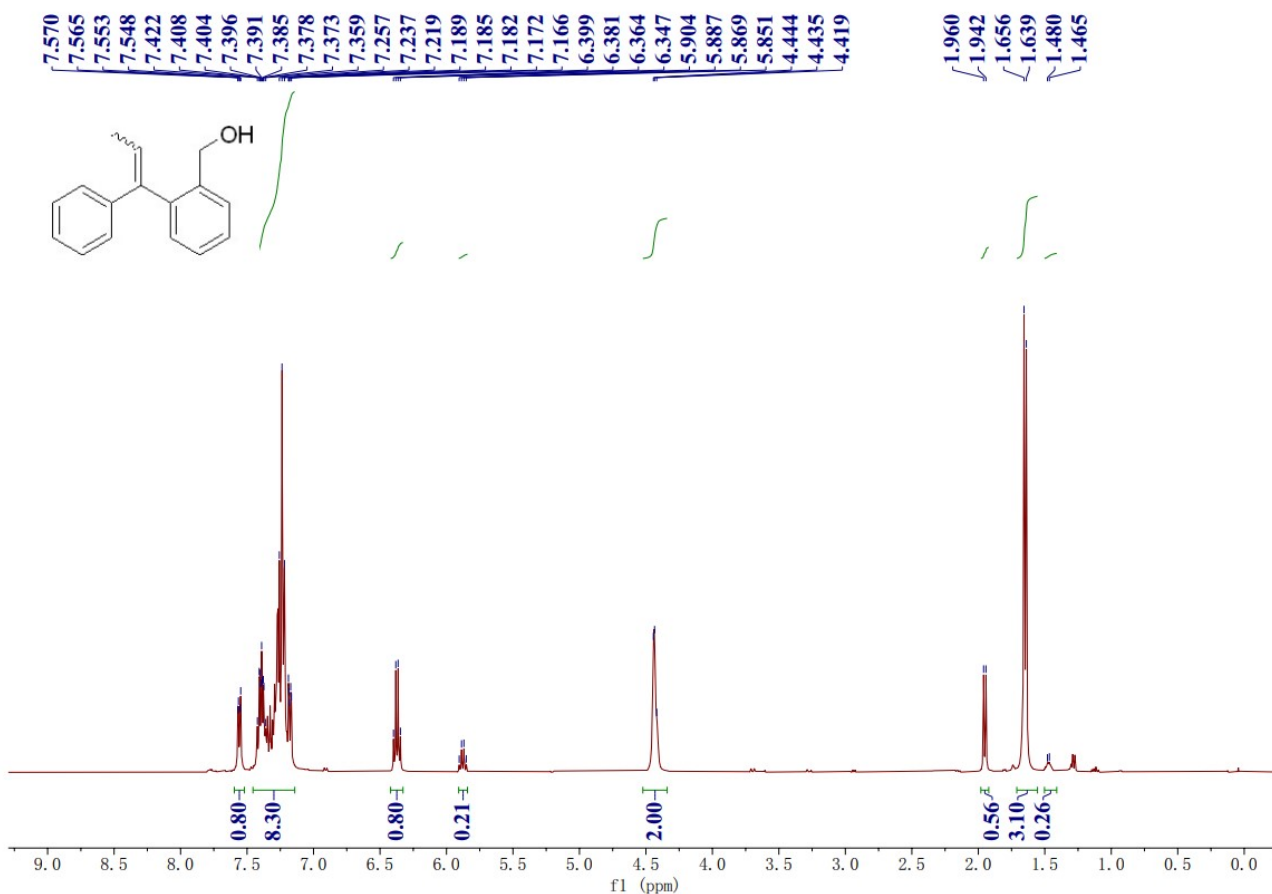



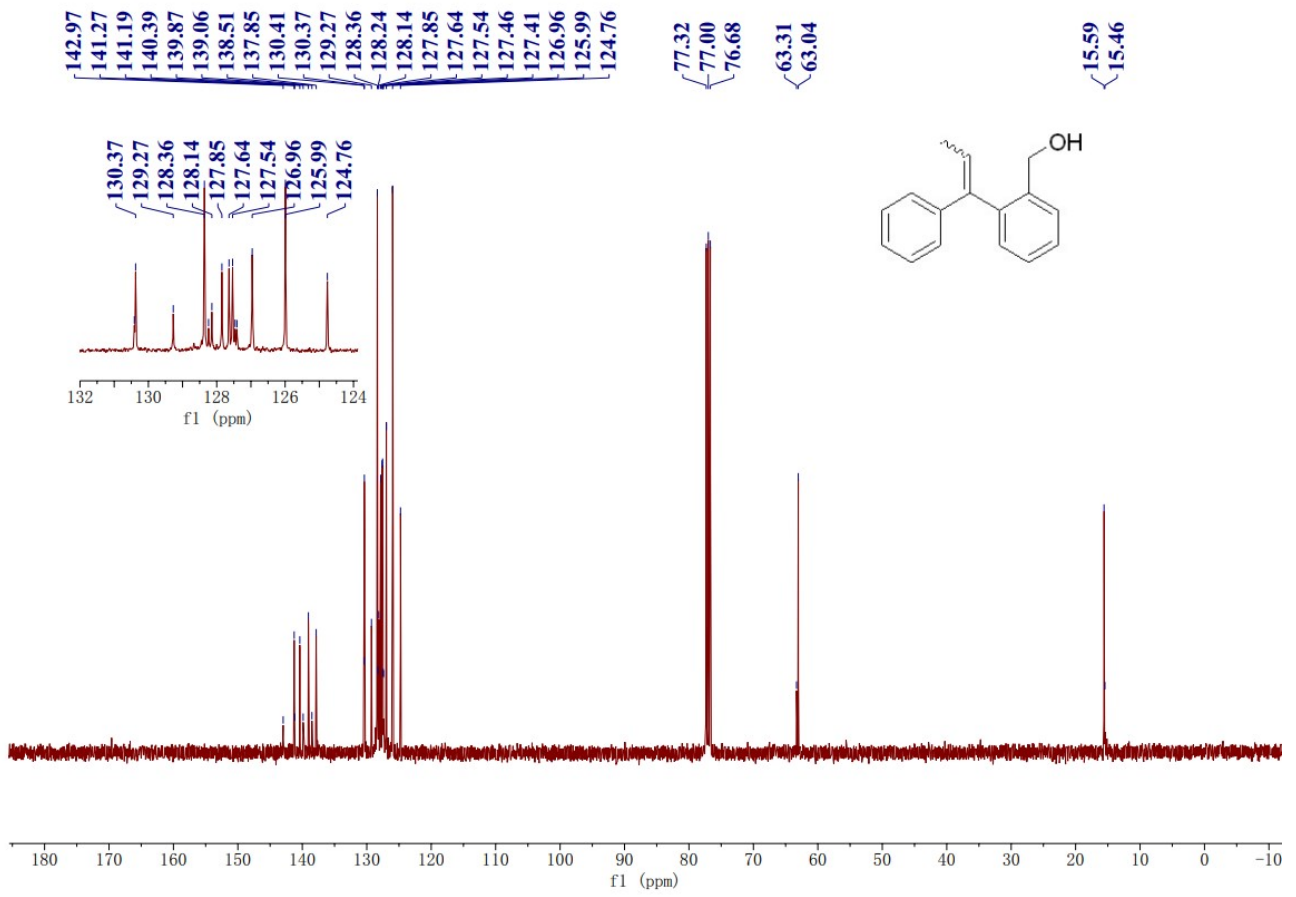

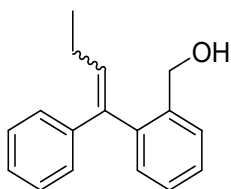

### (2-(1-phenylbut-1-en-1-yl)phenyl)methanol (1q)

A colorless oil. 131 mg, 68% yield.  $^1\text{H}$  NMR ( $\text{CDCl}_3$ , TMS, 400 MHz)  $\delta$  7.53 (d,  $J = 6.8$  Hz, 0.60H), 7.41-7.16 (m, 8.24H), 6.25 (t,  $J = 7.4$  Hz, 0.61H), 5.74 (t,  $J = 7.4$  Hz, 0.43H), 4.42 (d,  $J = 4.0$  Hz, 2H), 2.38-2.31 (m, 0.96H), 1.99-1.94 (m, 1.21H), 1.46 (br, 0.55), 1.32 (br, 0.36), 1.10 (t,  $J = 7.6$  Hz, 1.36H), 1.01 (t,  $J = 7.6$  Hz, 1.71H).  $^{13}\text{C}$  NMR ( $\text{CDCl}_3$ , TMS, 100 MHz)  $\delta$  142.9, 141.2, 140.2, 139.8, 139.1, 138.9, 138.6, 138.1, 134.8, 132.2, 130.5, 130.4, 129.2, 128.4, 128.3, 128.2, 127.9, 127.7, 127.54, 127.51, 127.45, 127.1, 127.1, 126.1, 63.4, 63.1, 23.3, 22.9, 14.7, 14.1. IR (acetone)  $\nu$  3333, 3059, 2930, 1493, 1444, 1374, 1195, 1031, 869, 699  $\text{cm}^{-1}$ . HRMS (EI) Calcd. for  $\text{C}_{17}\text{H}_{16}$  ( $\text{M}-\text{H}_2\text{O}$ ) $^+$ : 220.1247, Found: 220.1245.

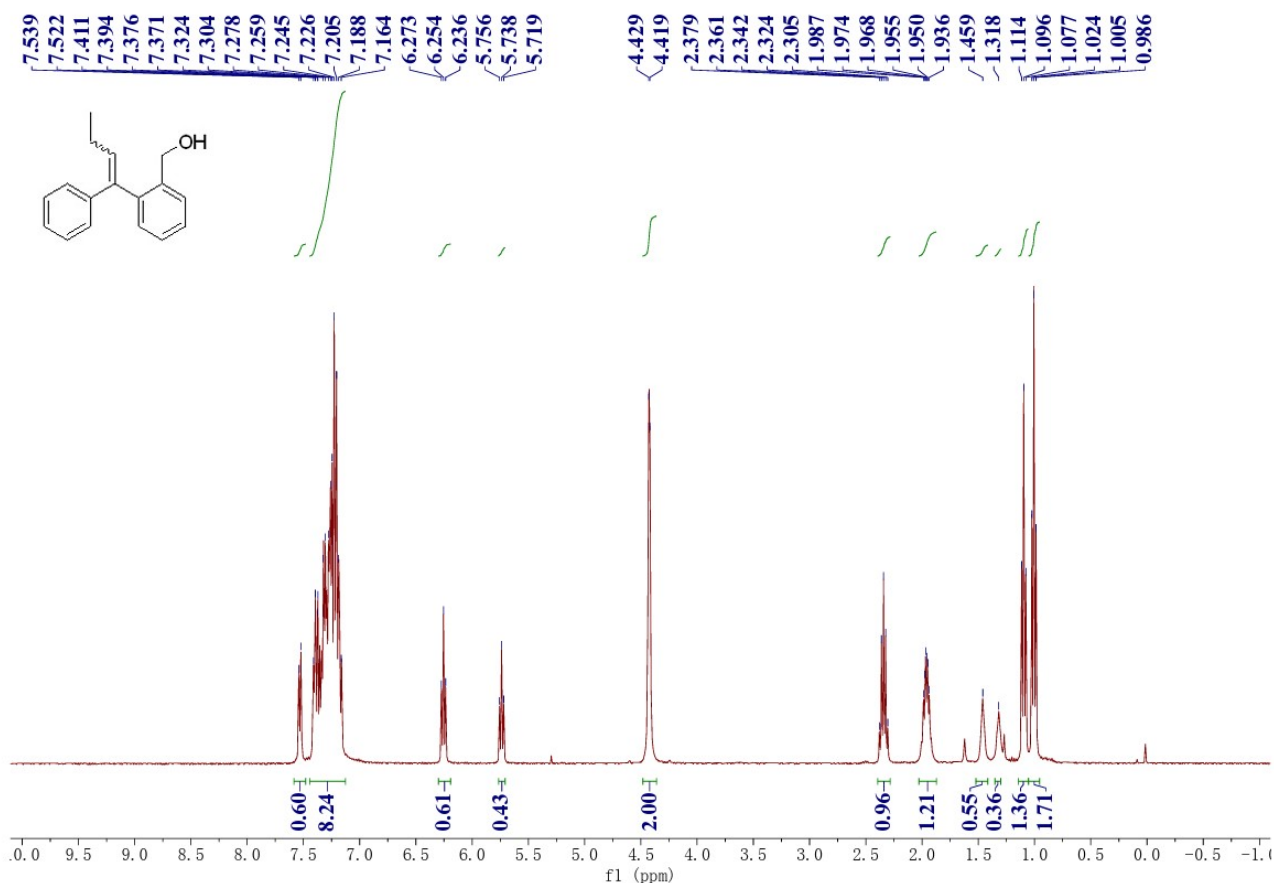

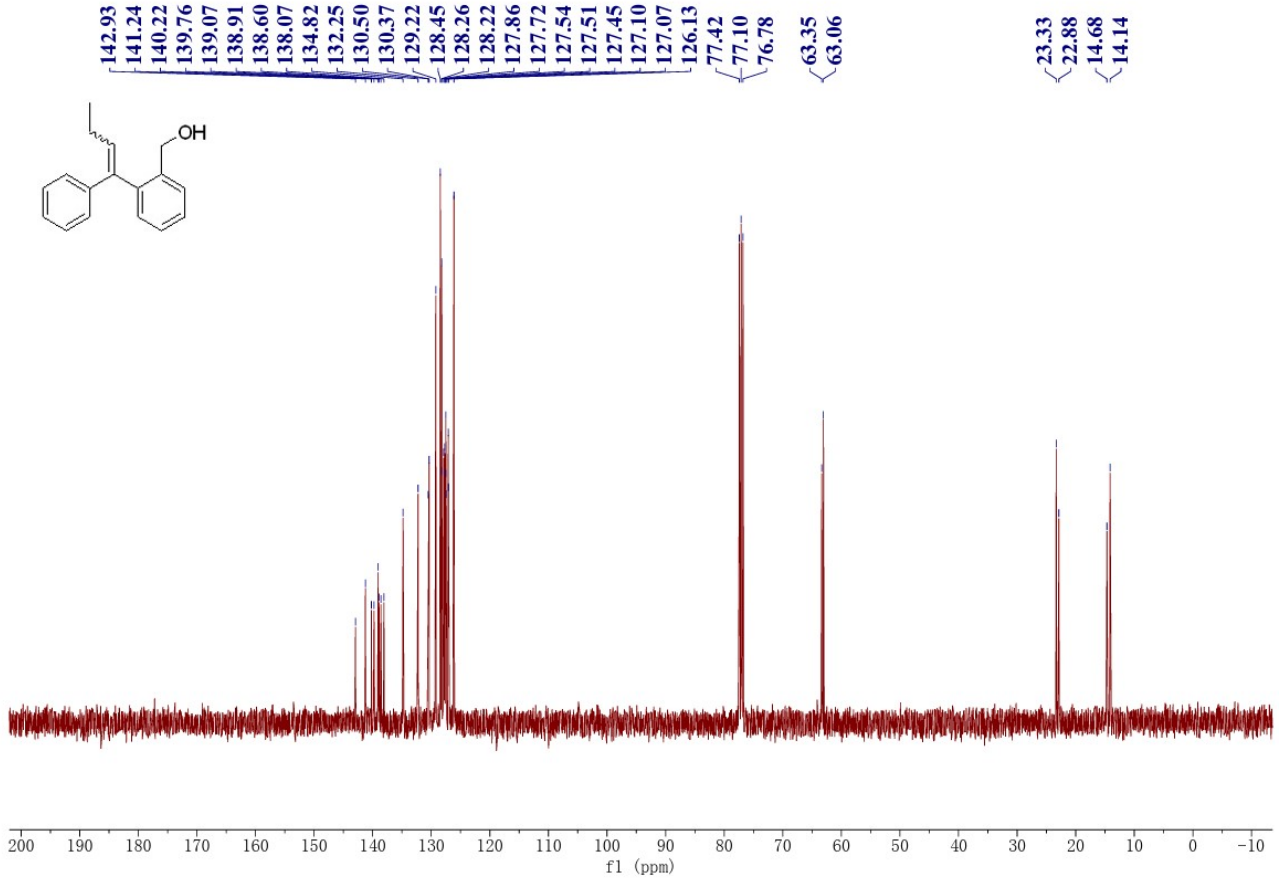

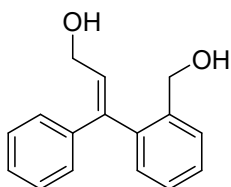

**(E)-3-(2-(hydroxymethyl)phenyl)-3-phenylprop-2-en-1-ol (1r)**

A colorless oil, 256 mg, 78% yield.  $^1\text{H}$  NMR ( $\text{CDCl}_3$ , TMS, 400 MHz)  $\delta$  7.47-7.45 (m, 1H), 7.35-7.20 (m, 7H), 7.11-7.09 (m, 1H), 6.49 (dd,  $J = 9.0, 6.0$  Hz, 1H), 4.35 (q,  $J = 11.6$  Hz, 2H), 4.13 (s, 2H), 3.96-3.92 (m, 1H), 3.81-3.76 (m, 1H).  $^{13}\text{C}$  NMR ( $\text{CDCl}_3$ , TMS, 100 MHz)  $\delta$  142.5, 140.1, 138.6, 137.9, 130.2, 129.9, 128.4, 128.11, 128.07, 127.8, 127.4, 126.5, 62.6, 59.4. IR (acetone)  $\nu$  3312, 3027, 2924, 2877, 1492, 1445, 1198, 1109, 964, 695  $\text{cm}^{-1}$ . Calcd. for  $\text{C}_{16}\text{H}_{14}\text{O}$  (M- $\text{H}_2\text{O}$ ) $^+$ : 222.1039, Found: 222.1038.

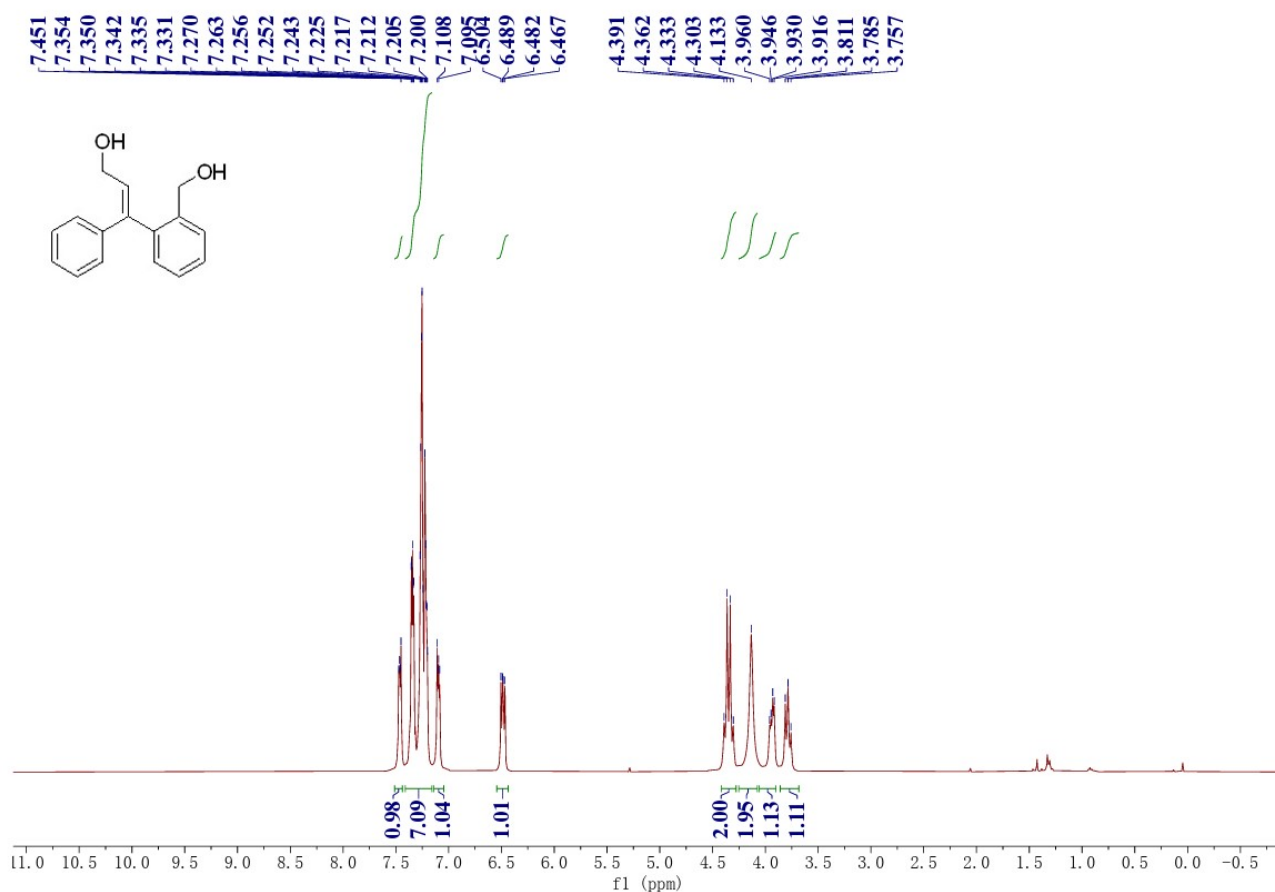

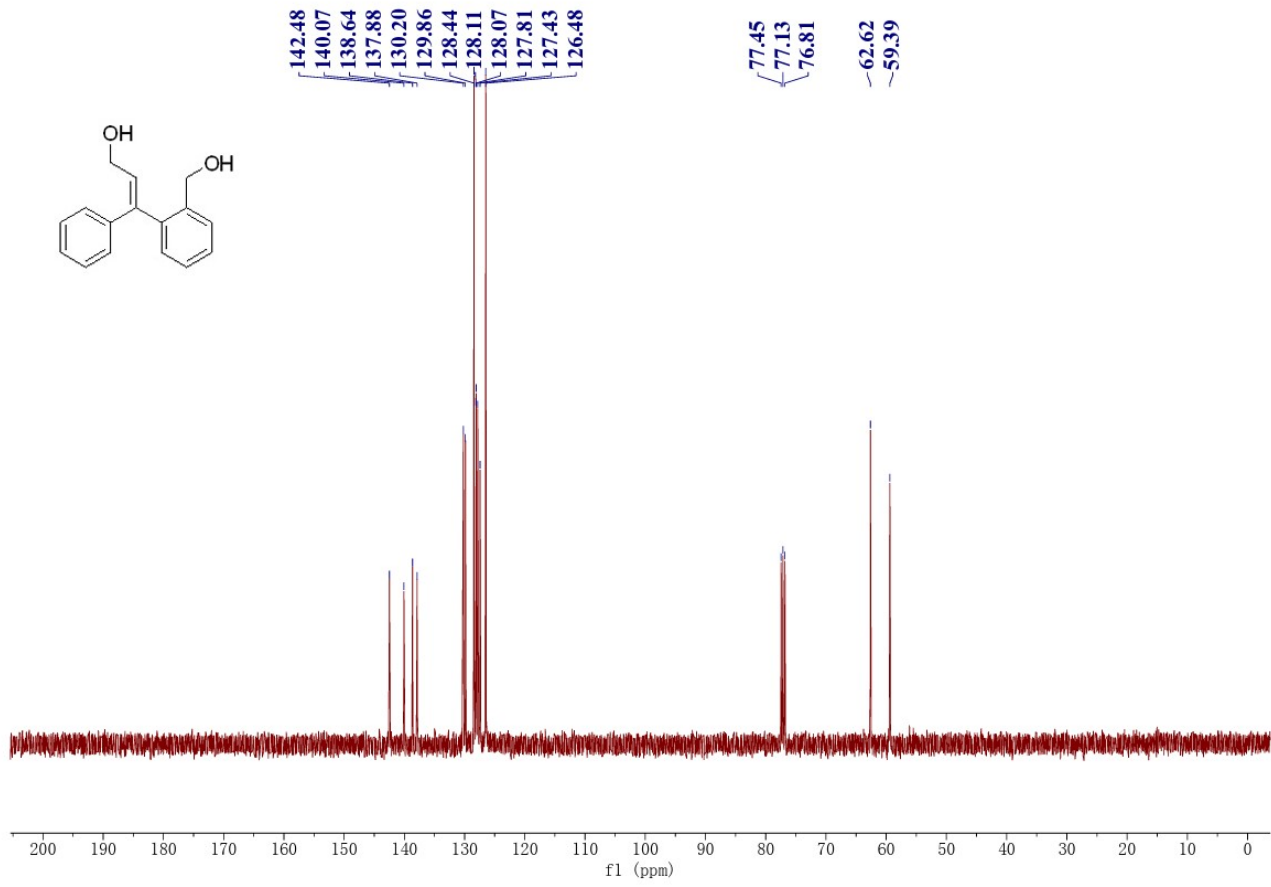

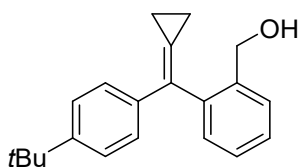

**(2-((4-(tert-butyl)phenyl)(cyclopropylidene)methyl)phenyl)methanol (1s)**

A colorless oil. 381 mg, 81% yield.  $^1\text{H}$  NMR ( $\text{CDCl}_3$ , TMS, 400 MHz)  $\delta$  7.52 (d,  $J = 7.6$  Hz, 1H), 7.39-7.29 (m, 6H), 7.21-7.19 (m, 1H), 4.44 (s, 2H), 1.61-1.58 (m, 3H), 1.30 (s, 9H), 1.12-1.08 (m, 2H).  $^{13}\text{C}$  NMR ( $\text{CDCl}_3$ , TMS, 150 MHz)  $\delta$  150.1, 139.9, 139.2, 137.4, 130.3, 128.2, 127.9, 127.60, 127.57, 126.2, 125.3, 123.9, 63.4, 34.5, 31.3, 5.6, 1.6. IR (acetone)  $\nu$  3367, 2962, 2903, 1518, 1461, 1363, 1228, 1019, 836, 759  $\text{cm}^{-1}$ . HRMS (EI) Calcd. for  $\text{C}_{21}\text{H}_{24}\text{O}$  ( $\text{M}^+$ ): 292.1822, Found: 292.1817.

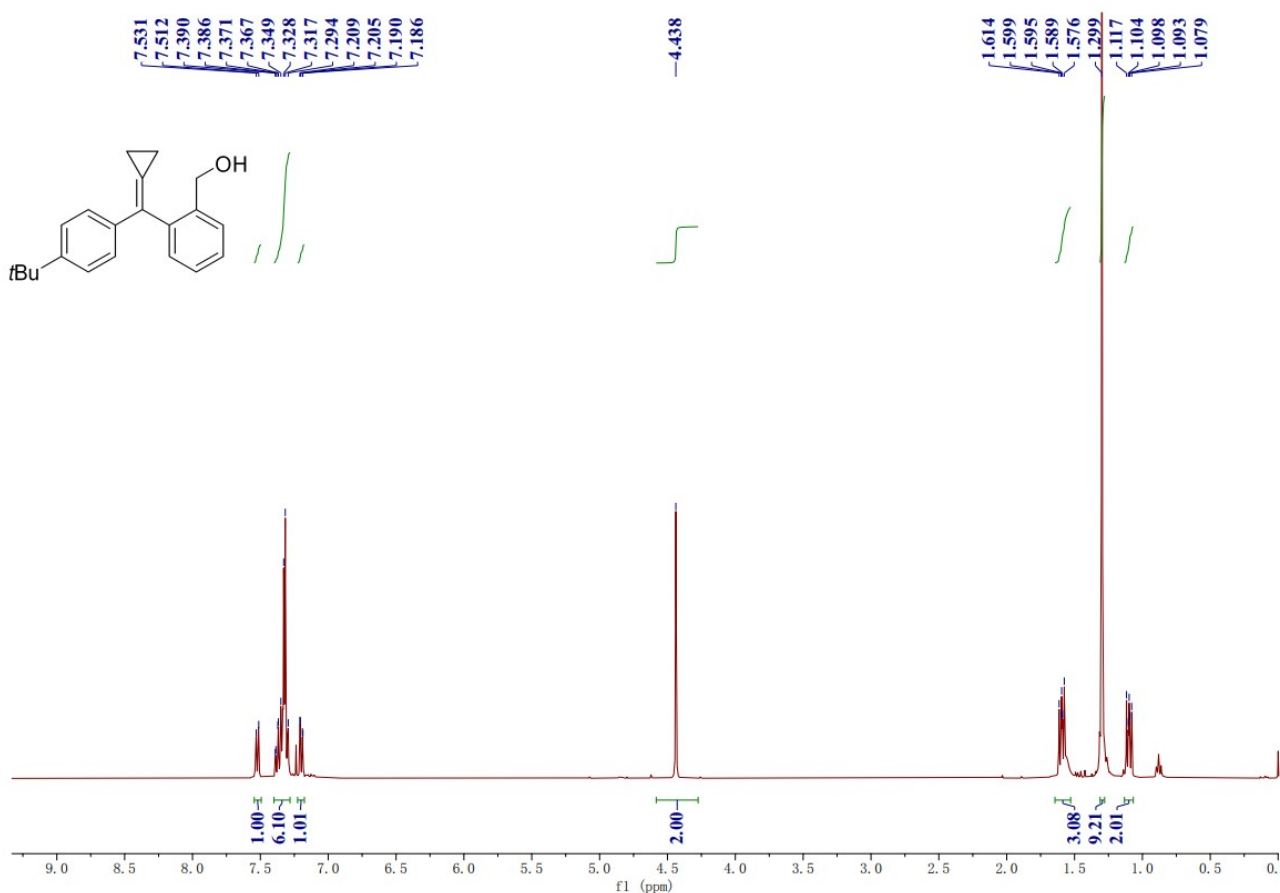

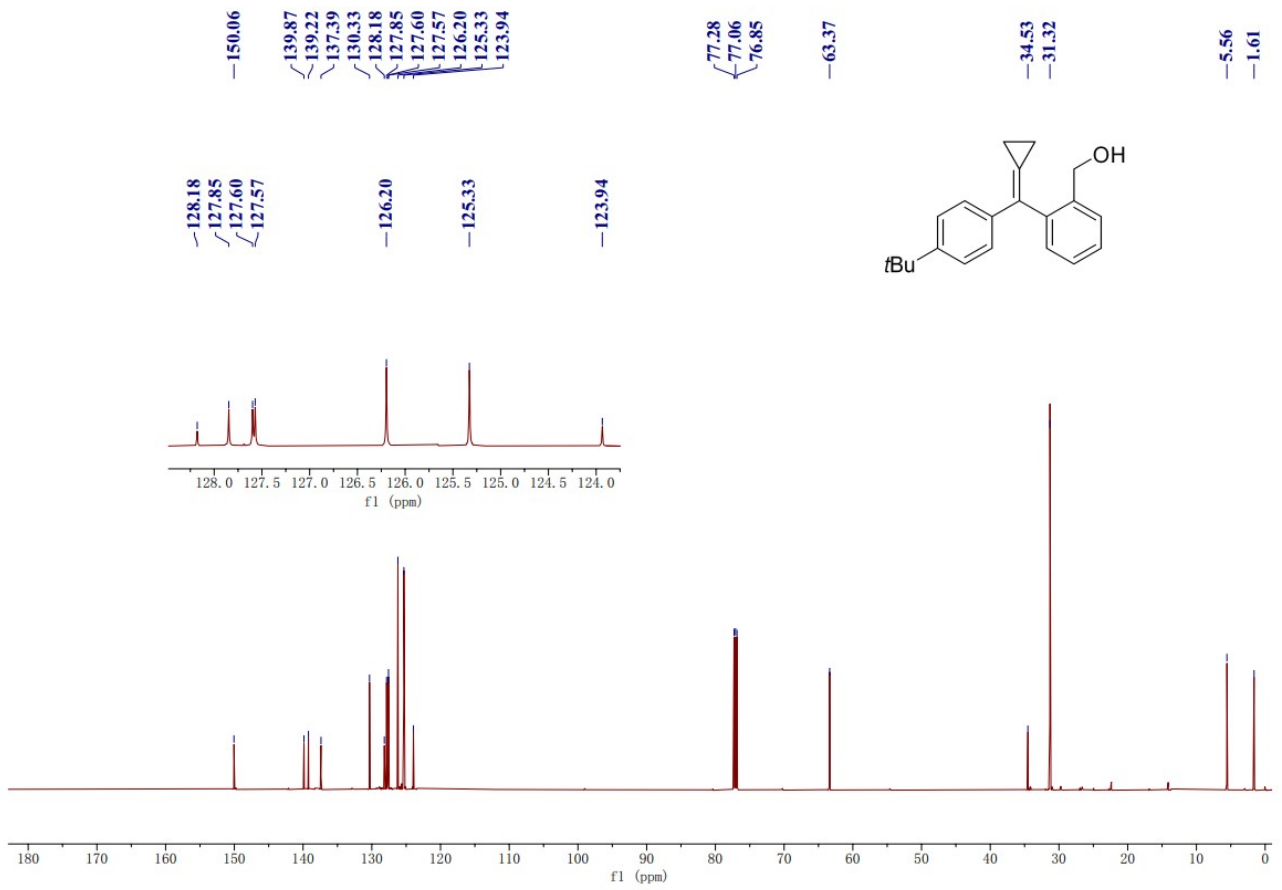

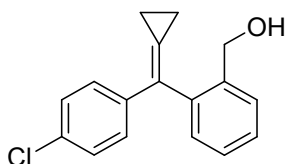

**(2-((4-chlorophenyl)(cyclopropylidene)methyl)phenyl)methanol (1t)**

A colorless oil. 306 mg, 81% yield.  $^1\text{H}$  NMR ( $\text{CDCl}_3$ , TMS, 400 MHz)  $\delta$  7.54 (d,  $J = 7.2$  Hz 1H), 7.42-7.37 (m, 1H), 7.36-7.32 (m, 3H), 7.26-7.24 (m, 2H), 7.20-7.17 (m, 1H), 4.43 (s, 2H), 1.62-1.58 (m, 2H), 1.50 (br, 1H), 1.14-1.11 (m, 2H).  $^{13}\text{C}$  NMR ( $\text{CDCl}_3$ , TMS, 100 MHz)  $\delta$  139.1, 139.0, 138.7, 132.7, 130.2, 128.5, 127.8, 127.7, 127.6, 127.4, 125.6, 77.4, 77.1, 76.8, 63.0, 5.6, 1.8. IR (acetone)  $\nu$  3312, 3048, 2972, 1489, 1448, 1399, 1189, 1092, 903, 760  $\text{cm}^{-1}$ . HRMS (EI) Calcd. for  $\text{C}_{17}\text{H}_{15}\text{ClO}$  ( $\text{M}^+$ ): 270.0806, Found: 270.0801.

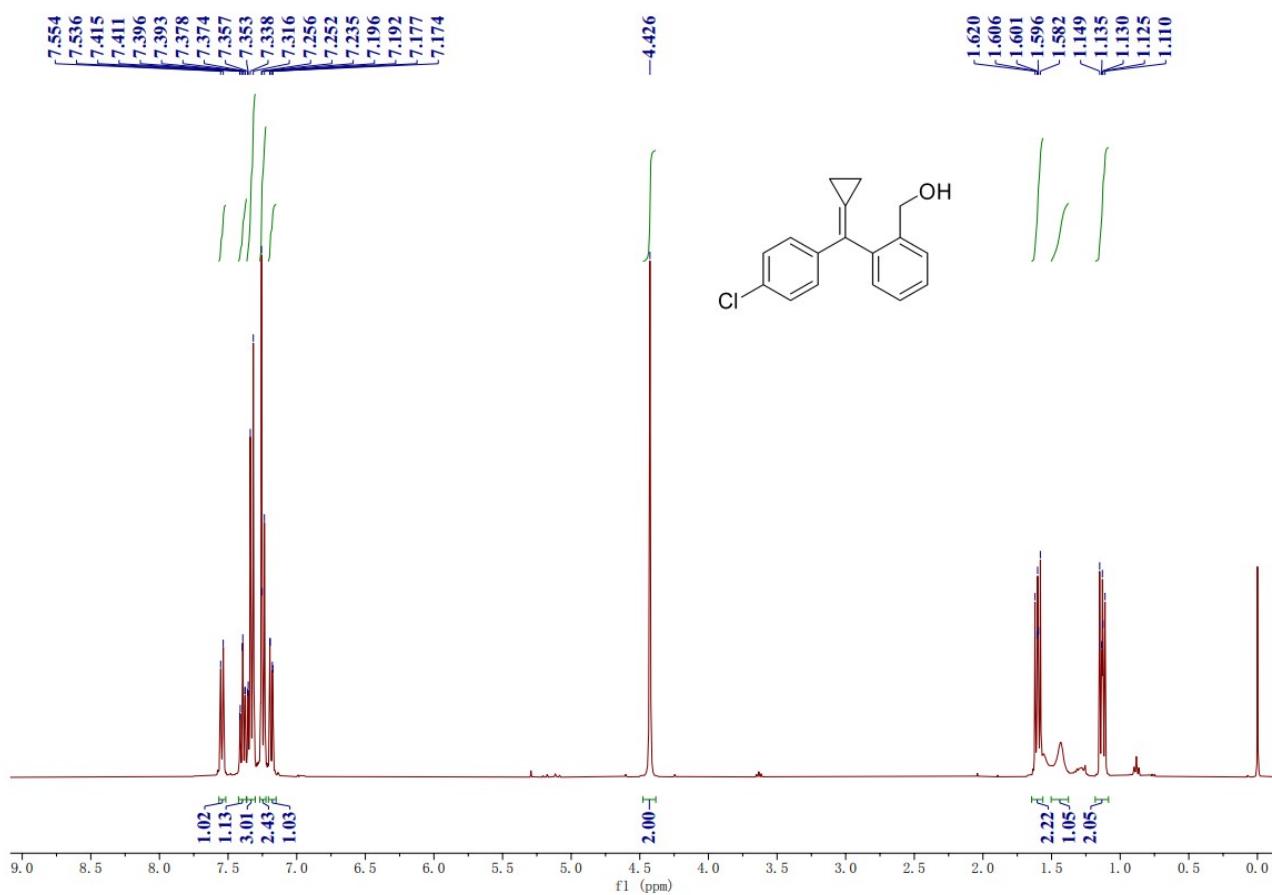



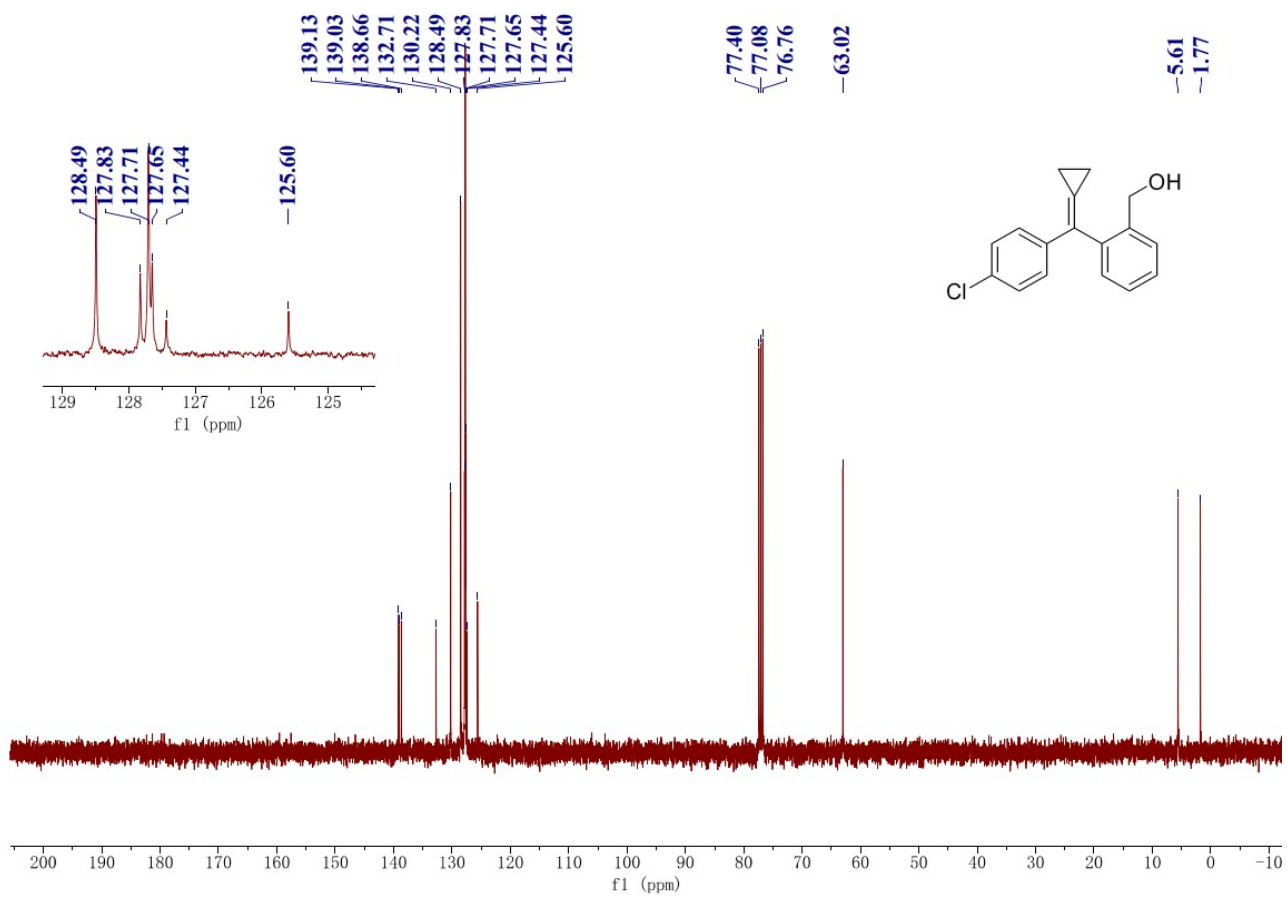

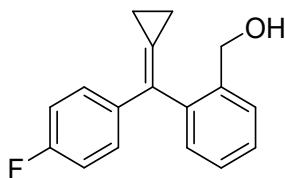

**(2-(cyclopropylidene(4-fluorophenyl)methyl)phenyl)methanol (1u)**

A colorless oil, 401 mg, 87% yield  $^1\text{H}$  NMR ( $\text{CDCl}_3$ , TMS, 400 MHz)  $\delta$  7.54 (d,  $J = 7.4$  Hz, 1H), 7.40-7.32 (m, 4H), 7.20 (d,  $J = 7.4$  Hz, 1H), 6.97 (t,  $J = 8.6$  Hz, 2H), 4.42 (s, 2H), 1.63-1.57 (m, 3H), 1.14-1.10 (m, 2H).  $^{13}\text{C}$  NMR ( $\text{CDCl}_3$ , TMS, 100 MHz)  $\delta$  161.9 (d,  $J = 248.5$  Hz), 139.2 (d,  $J = 25.0$  Hz), 136.4, 130.2, 128.1, 128.0, 127.8, 127.6, 126.4, 125.6, 124.5, 115.2 (d,  $J = 21.0$  Hz), 63.1, 5.5, 1.8.  $^{19}\text{F}$  NMR (376 MHz,  $\text{CDCl}_3$ )  $\delta$  -115.3. IR (acetone)  $\nu$  3369, 3025, 2972, 1482, 1445, 1224, 1189, 1100, 904, 757  $\text{cm}^{-1}$ . HRMS (EI) Calcd. for  $\text{C}_{17}\text{H}_{15}\text{FO}$  ( $\text{M}^+$ ): 254.1101, Found: 254.1104.

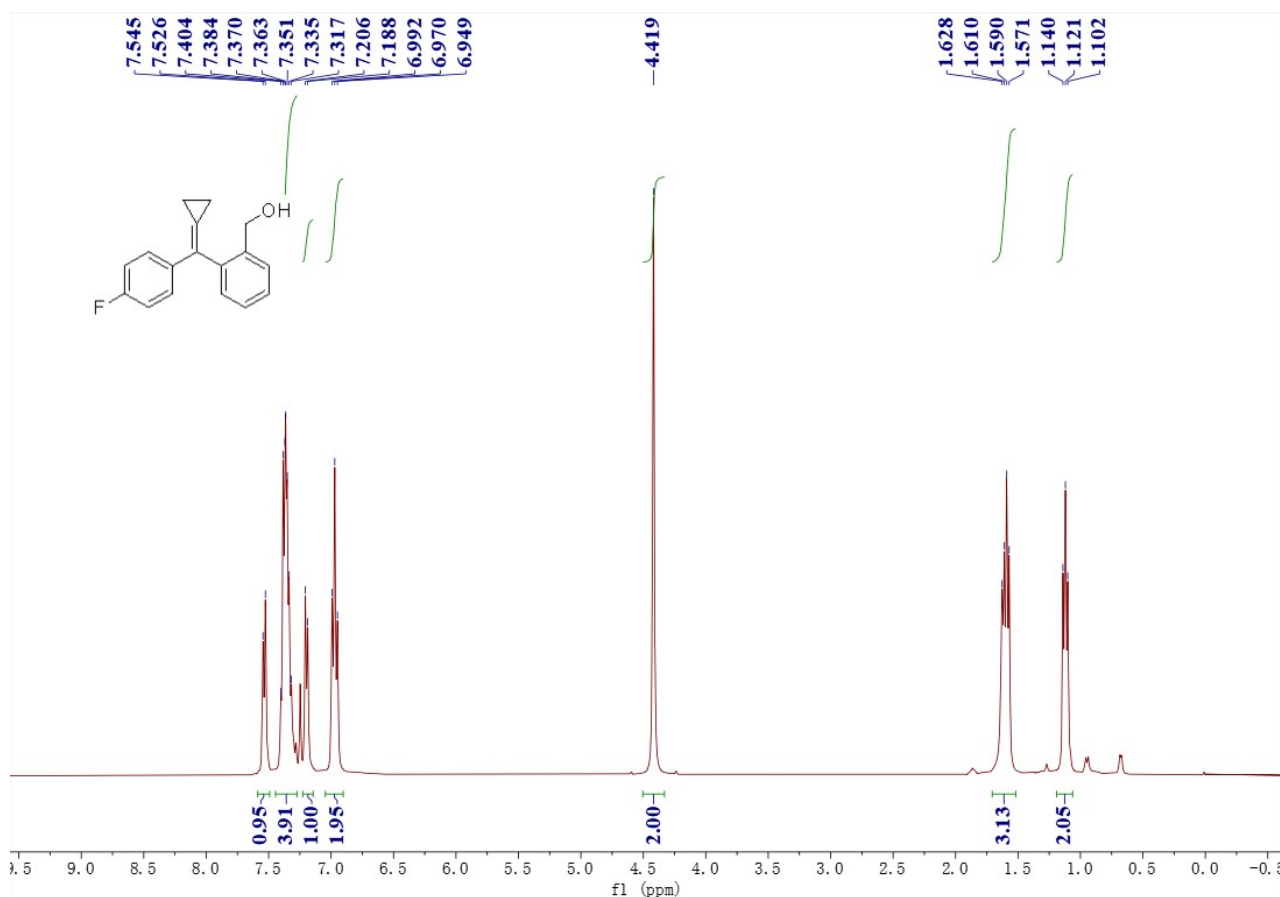

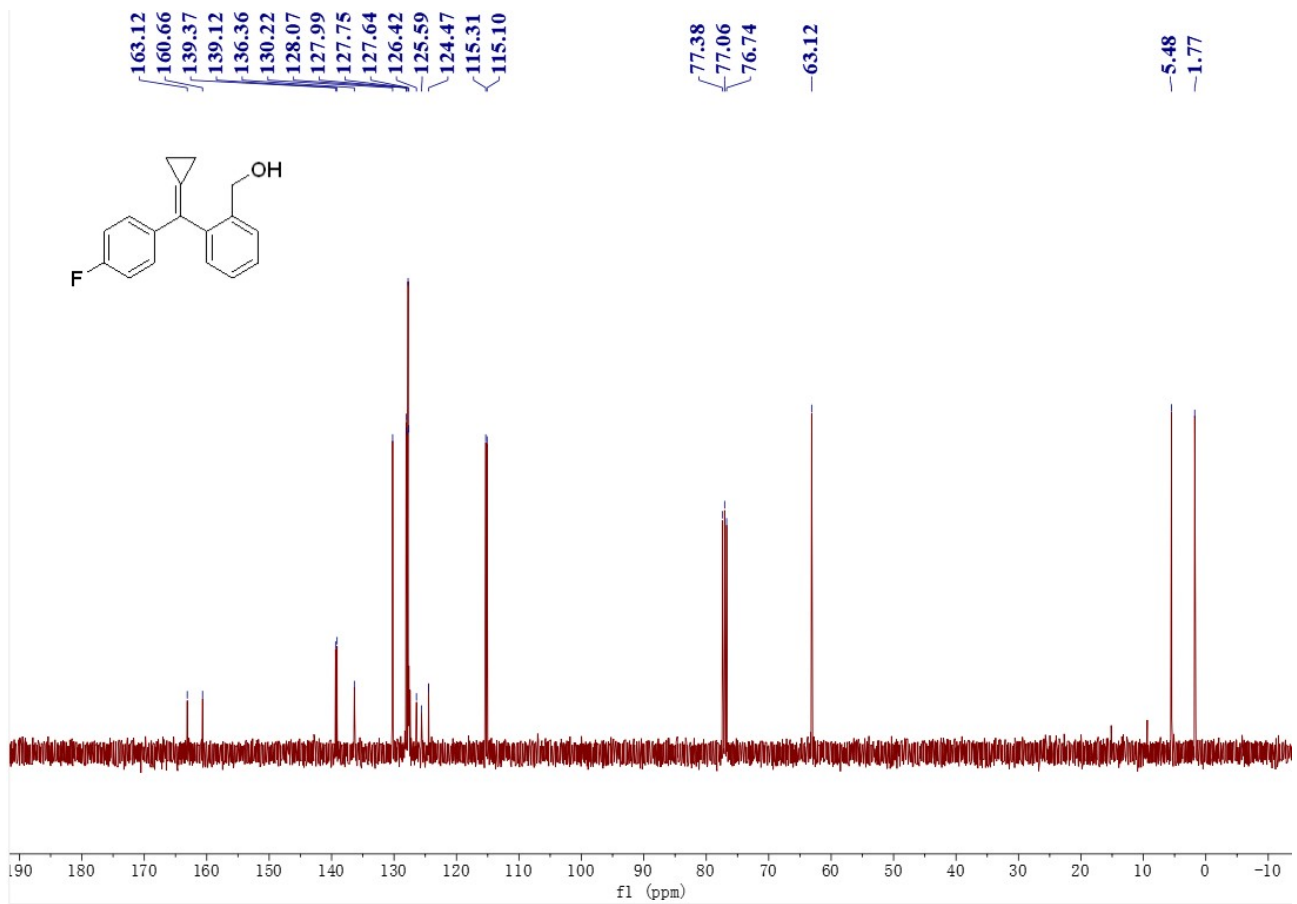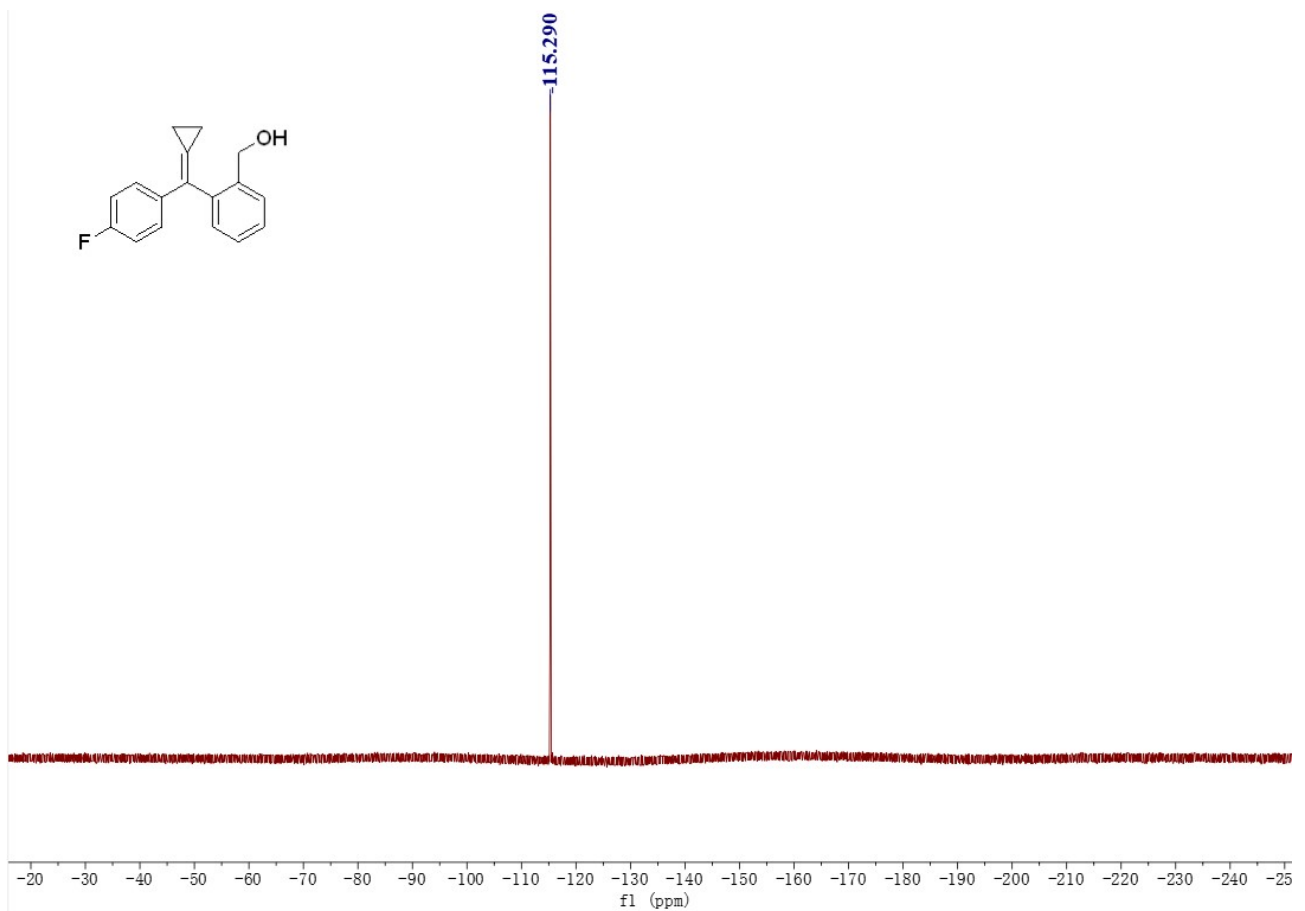

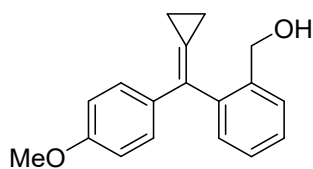

**(2-(cyclopropylidene(4-methoxyphenyl)methyl)phenyl)methanol (1v)**

A white solid, M.P.: 106-108 °C, 391 mg, 72% yield, <sup>1</sup>H NMR (CDCl<sub>3</sub>, TMS, 400 MHz) δ 7.53 (d, *J* = 7.6 Hz, 1H), 7.40-7.32 (m, 4H), 7.21 (d, *J* = 9.0 Hz, 1H), 6.84 (d, *J* = 8.6 Hz, 2H), 4.44 (s, 2H), 3.80 (s, 3H), 1.60-1.57 (m, 2H), 1.48 (br, 1H), 1.13-1.09 (m, 2H). <sup>13</sup>C NMR (CDCl<sub>3</sub>, TMS, 100 MHz) δ 158.6, 139.9, 139.1, 133.0, 130.2, 127.80, 127.77, 127.61, 127.5, 122.5, 113.7, 63.3, 55.2, 5.4, 1.6. IR (acetone) ν 3382, 2933, 1604, 1577, 1452, 1300, 1176, 1032, 756, 700 cm<sup>-1</sup>. HRMS (FI) Calcd. for C<sub>18</sub>H<sub>18</sub>O<sub>2</sub> (M<sup>+</sup>): 266.1301, Found: 266.1305.

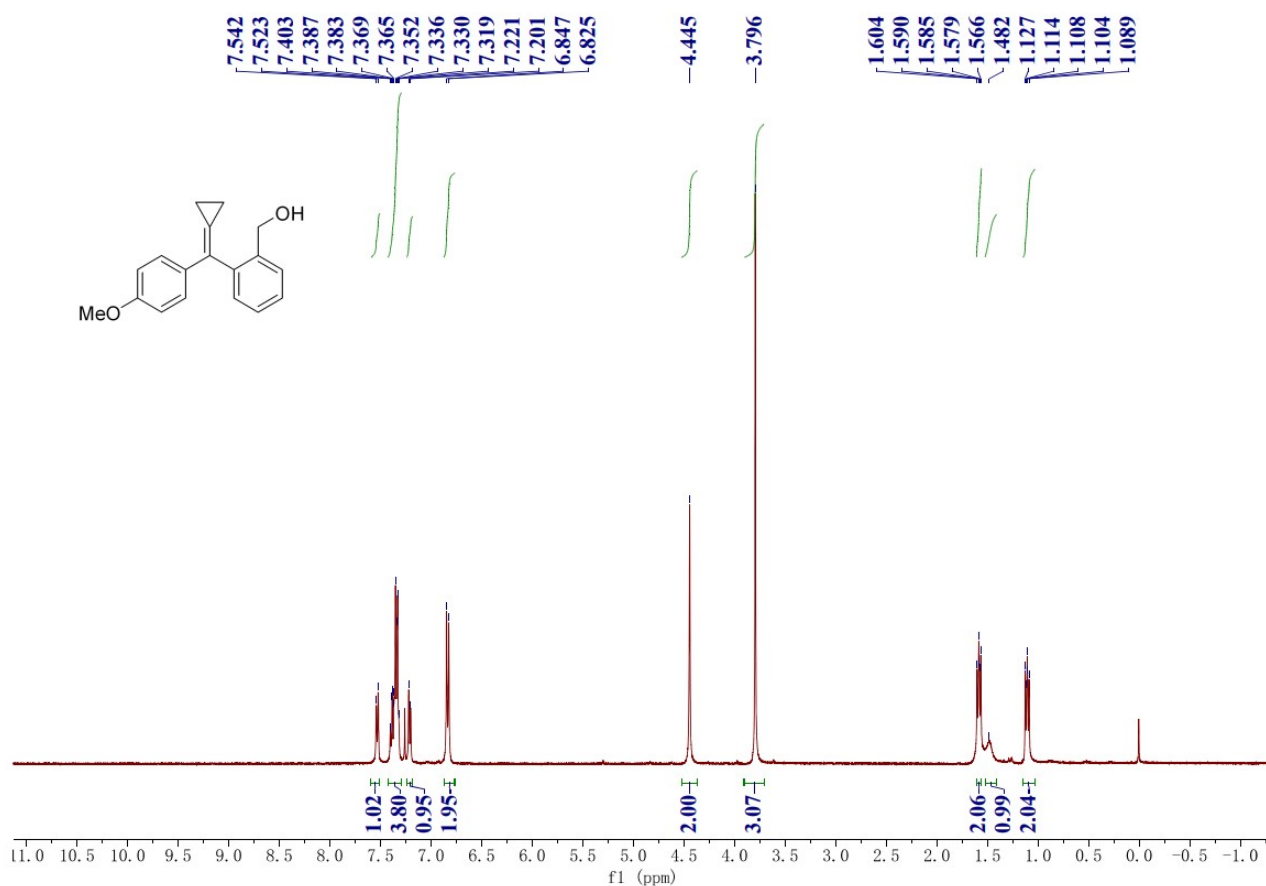

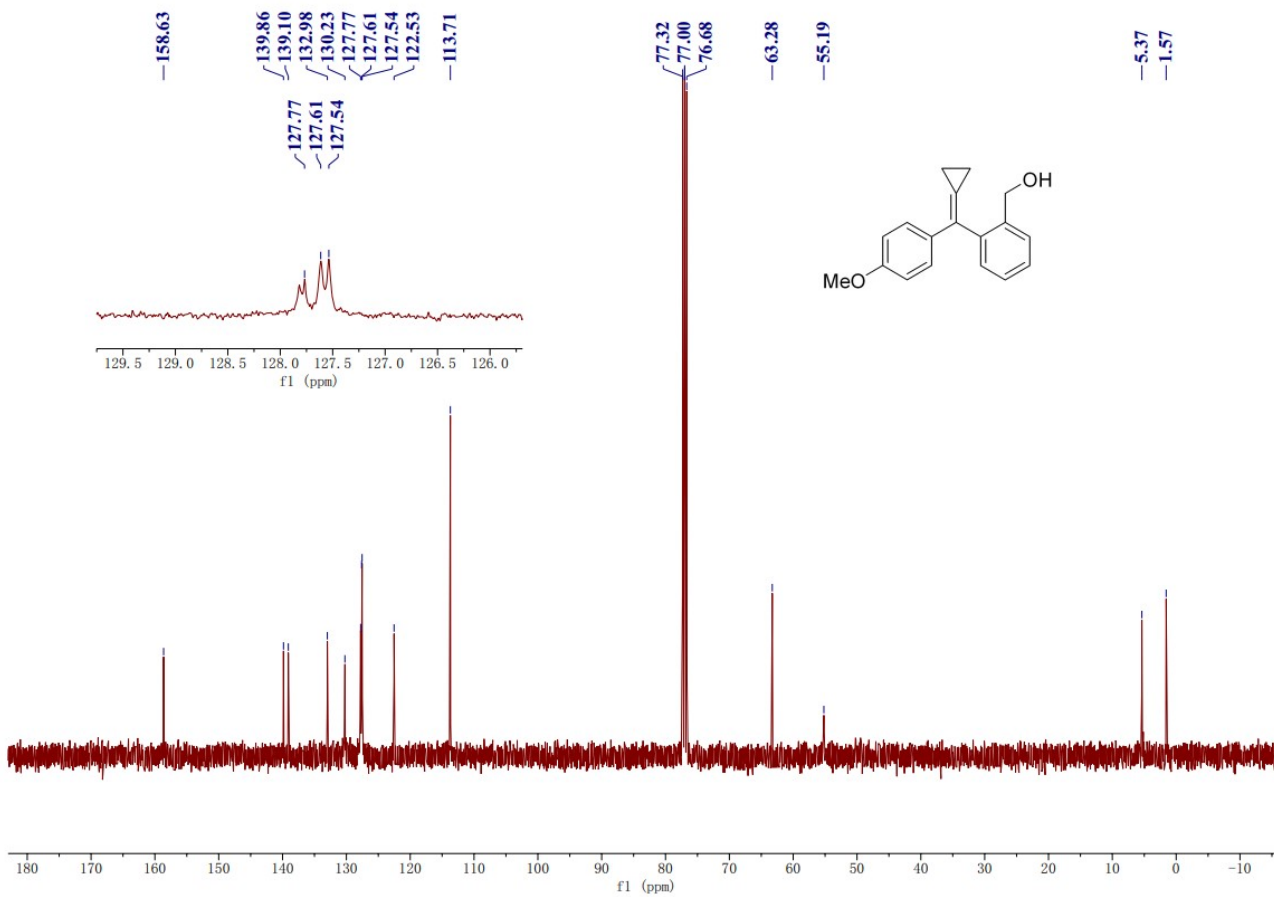

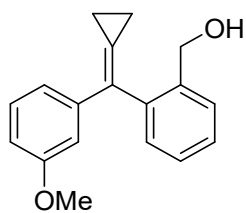

**(2-(cyclopropylidene(3-methoxyphenyl)methyl)phenyl)methanol (1w)**

A colorless oil, 208 mg, 73% yield.  $^1\text{H}$  NMR ( $\text{CDCl}_3$ , TMS, 400 MHz)  $\delta$  7.52 (d,  $J = 7.6$  Hz, 1H), 7.39-7.30 (m, 2H), 7.22-7.17 (m, 2H), 7.01-7.00 (m, 1H), 6.94 (d,  $J = 7.8$  Hz, 1H), 6.79-6.76 (m, 1H), 4.44 (s, 2H), 3.76 (s, 3H), 1.63-1.59 (m, 2H), 1.49 (br, 1H), 1.14-1.11 (m, 2H).  $^{13}\text{C}$  NMR ( $\text{CDCl}_3$ , TMS, 150 MHz)  $\delta$  159.7, 141.8, 139.6, 139.2, 130.3, 129.3, 128.3, 127.9, 127.7, 127.6, 125.3, 119.2, 112.5, 112.2, 63.3, 55.2, 5.6, 1.7. IR (acetone)  $\nu$  3383, 2969, 1596, 1577, 1463, 1287, 1162, 1039, 752, 697  $\text{cm}^{-1}$ . HRMS (EI) Calcd. for  $\text{C}_{18}\text{H}_{18}\text{O}_2$  ( $\text{M}^+$ ): 266.1301, Found: 266.1298.

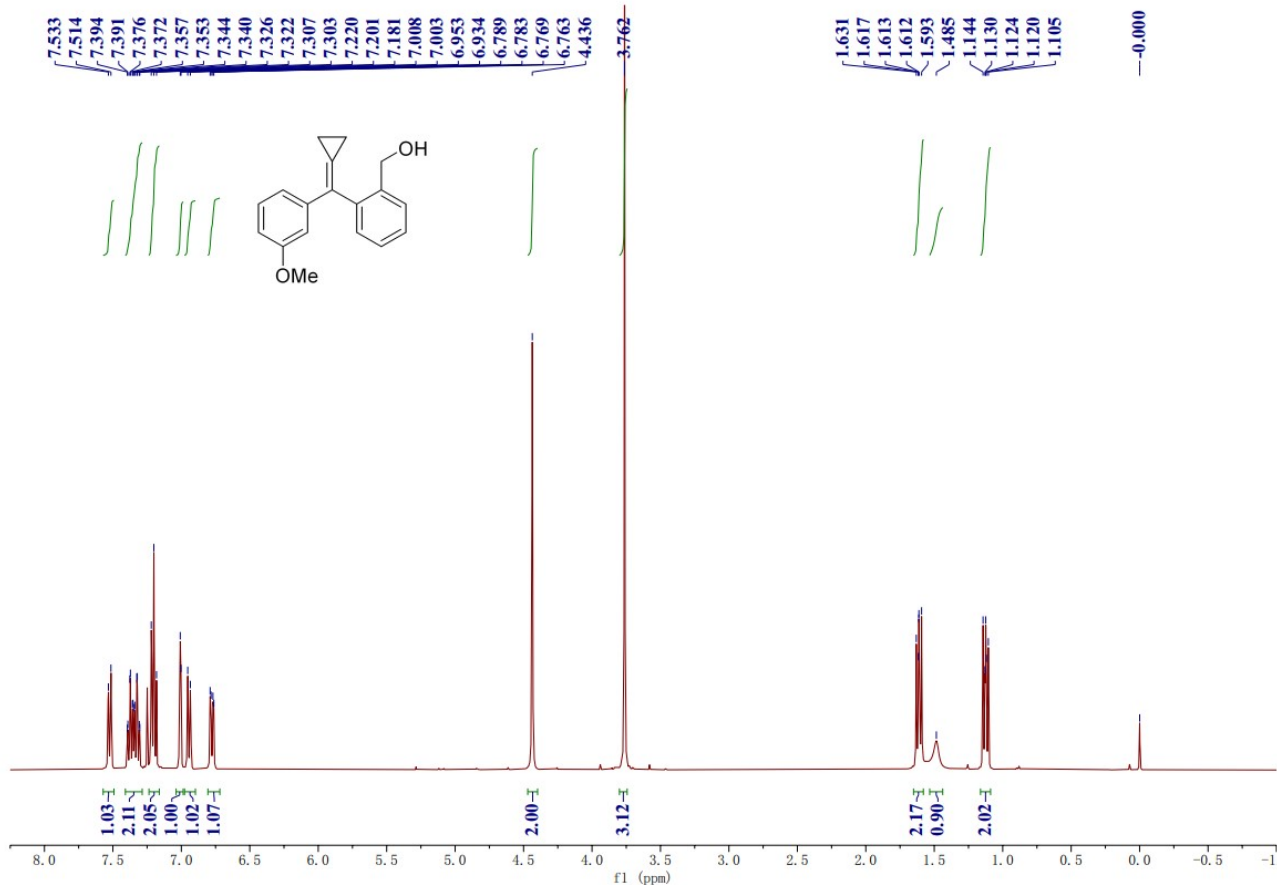

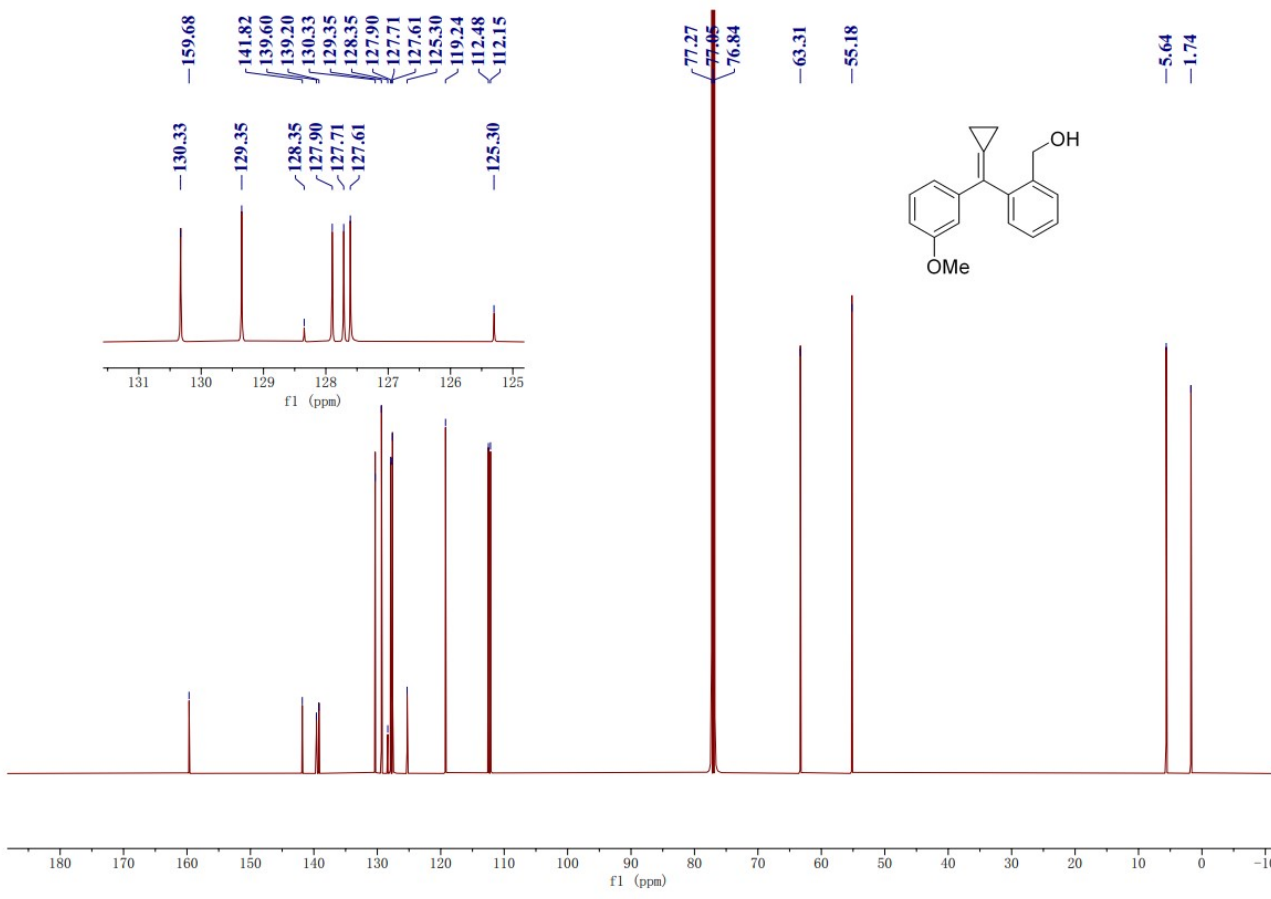

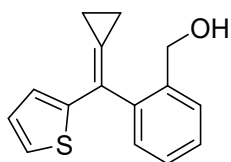

**(2-(cyclopropylidene(thiophen-2-yl)methyl)phenyl)methanol (1x)**

A white solid, M.P.: 105-108 °C, 290 mg, 73% yield. <sup>1</sup>H NMR (CDCl<sub>3</sub>, TMS, 400 MHz) δ 7.57 (d, *J* = 7.6 Hz, 1H), 7.40 (t, *J* = 7.6 Hz, 1H), 7.34 (t, *J* = 7.4 Hz, 1H), 7.29-7.18 (m, 3H), 6.92-6.90 (m, 1H), 6.57 (d, *J* = 3.6 Hz, 1H), 4.54 (s, 2H), 1.56-1.52 (m, 3H), 1.25-1.21 (m, 2H). <sup>13</sup>C NMR (CDCl<sub>3</sub>, TMS, 100 MHz) δ 146.2, 139.2, 138.5, 129.9, 128.0, 127.9, 127.5, 127.0, 124.9, 124.5, 123.9, 123.7, 63.1, 5.7, 3.4. IR (acetone) ν 3336, 3067, 2970, 1600, 1484, 1234, 1032, 844, 753, 697 cm<sup>-1</sup>. HRMS (EI) Calcd. for C<sub>15</sub>H<sub>14</sub>OS (M<sup>+</sup>): 242.0760, Found: 242.0762.

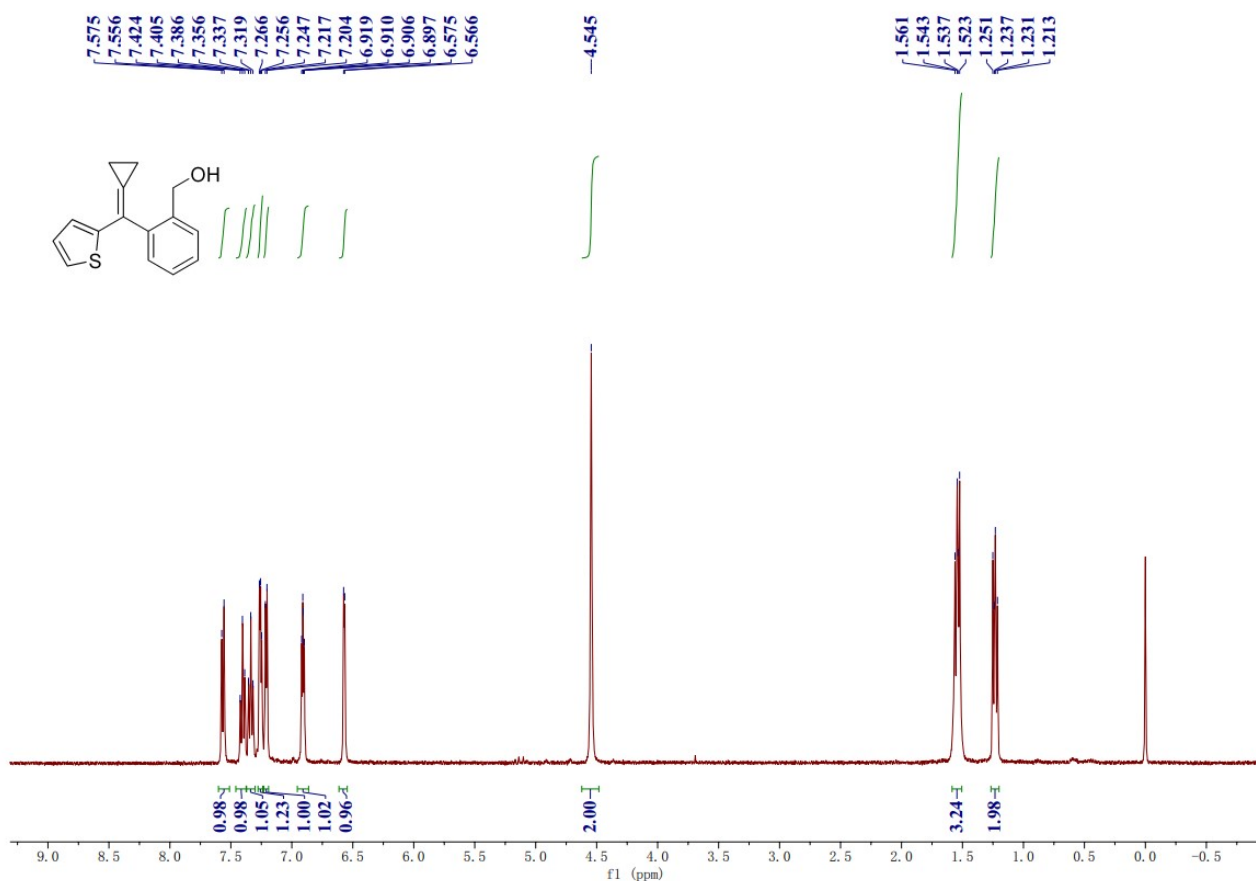



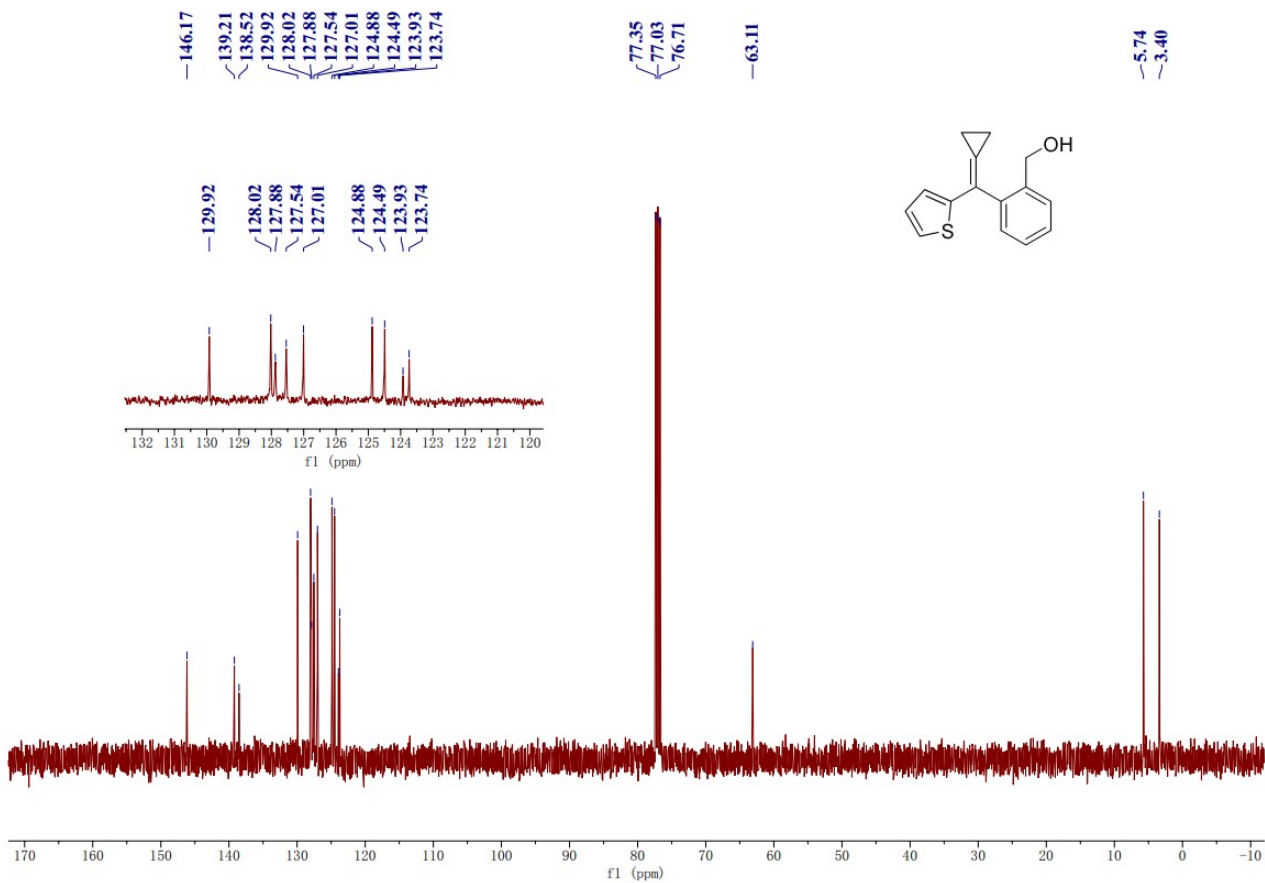

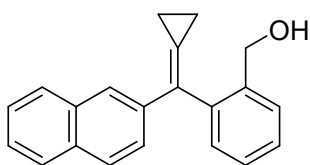

**(2-(cyclopropylidene(naphthalen-2-yl)methyl)phenyl)methanol (1y)**

A yellow solid, M.P.: 125-128 °C, 408 mg, 89% yield.  $^1\text{H}$  NMR ( $\text{CDCl}_3$ , TMS, 400 MHz)  $\delta$  7.91-7.81 (m, 3H), 7.71-7.60 (m, 3H), 7.47-7.39 (m, 4H), 7.32-7.30 (m, 1H), 4.48 (s, 2H), 1.75-1.71 (m, 3H), 1.21-1.17 (m, 2H).  $^{13}\text{C}$  NMR ( $\text{CDCl}_3$ , TMS, 100 MHz) 139.6, 139.3, 137.7, 133.5, 132.6, 130.4, 128.6, 128.2, 128.0, 127.80, 127.78, 127.7, 127.6, 126.2, 125.9, 125.8, 125.5, 124.6, 63.2, 5.9, 1.8. IR (acetone)  $\nu$  3380, 3056, 2974, 1600, 1505, 1485, 1193, 1037, 866, 749  $\text{cm}^{-1}$ . HRMS (EI) Calcd. for  $\text{C}_{21}\text{H}_{18}\text{O}$  ( $\text{M}^+$ ): 286.1352, Found: 286.1354.

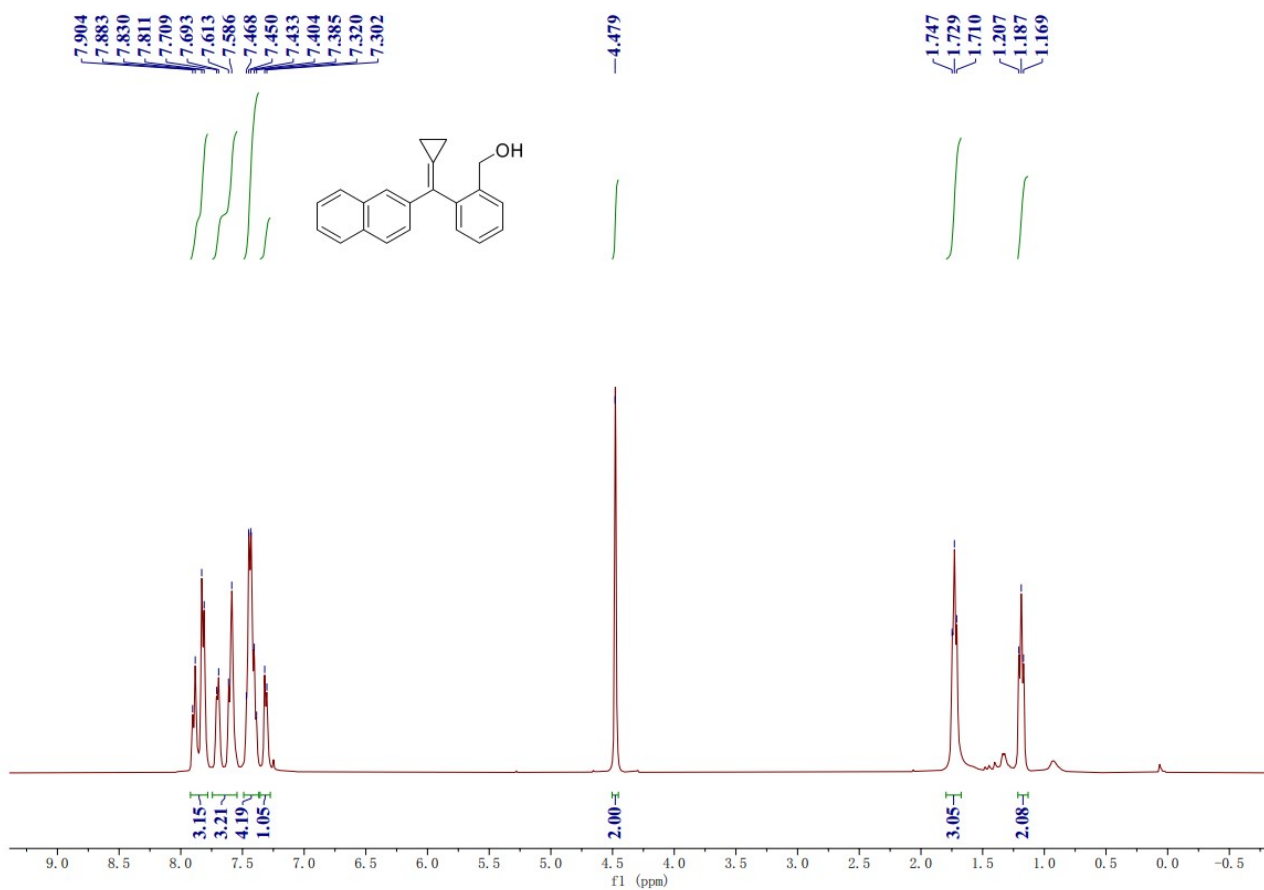

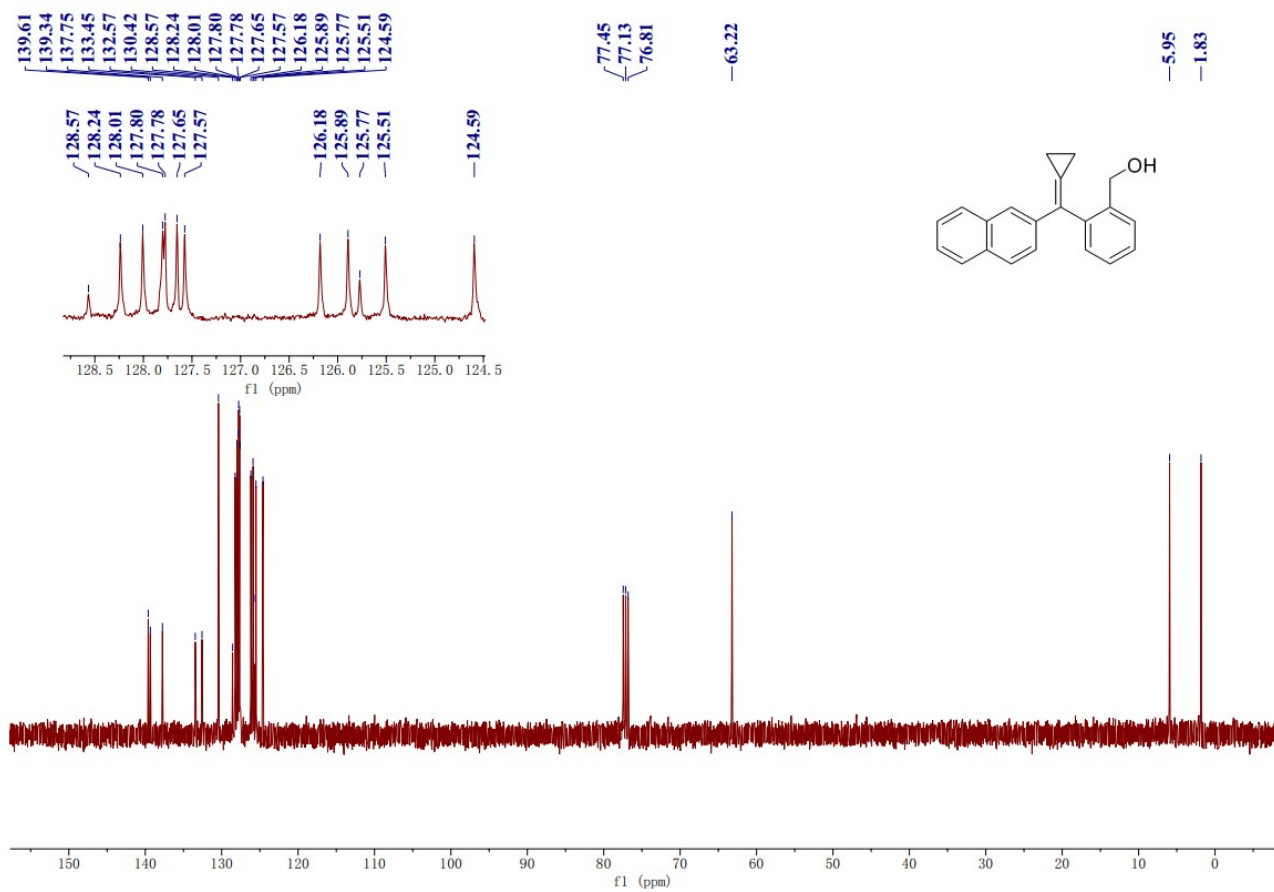

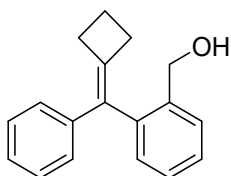

**(2-(cyclobutylidene(phenyl)methyl)phenyl)methanol (1z)**

A white solid, M.P.: 115-117 °C, 150 mg, 85% yield. <sup>1</sup>H NMR (CDCl<sub>3</sub>, TMS, 400 MHz) δ 7.51-7.49 (m, 1H), 7.37-7.34 (m, 2H), 7.32-7.12 (m, 6H), 4.45 (s, 2H), 3.17-3.13 (m, 2H), 2.62-2.58 (m, 2H), 2.11-2.03 (m, 2H), 1.62 (br, 1H). <sup>13</sup>C NMR (CDCl<sub>3</sub>, TMS, 100 MHz) δ 142.3, 139.7, 139.1, 138.3, 131.1, 130.6, 128.3, 128.1, 127.6, 127.5, 127.1, 126.3, 63.2, 32.9, 31.8, 17.5. IR (acetone) ν 3344, 3056, 2951, 1494, 1443, 1412, 1197, 1032, 901, 695 cm<sup>-1</sup>. HRMS (EI) Calcd. for C<sub>18</sub>H<sub>16</sub>O<sub>2</sub> (M-H<sub>2</sub>O)<sup>+</sup>: 232.1247, Found: 232.1248.

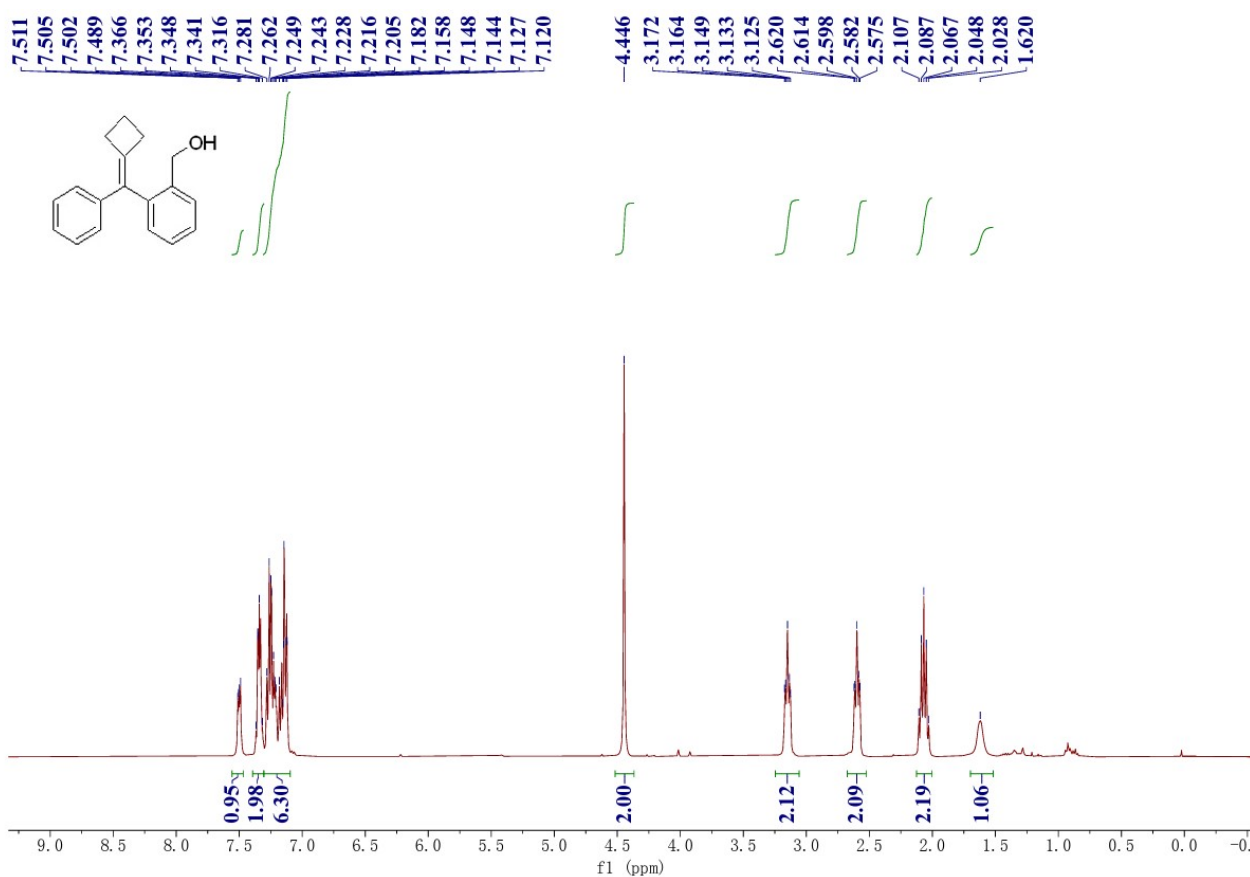

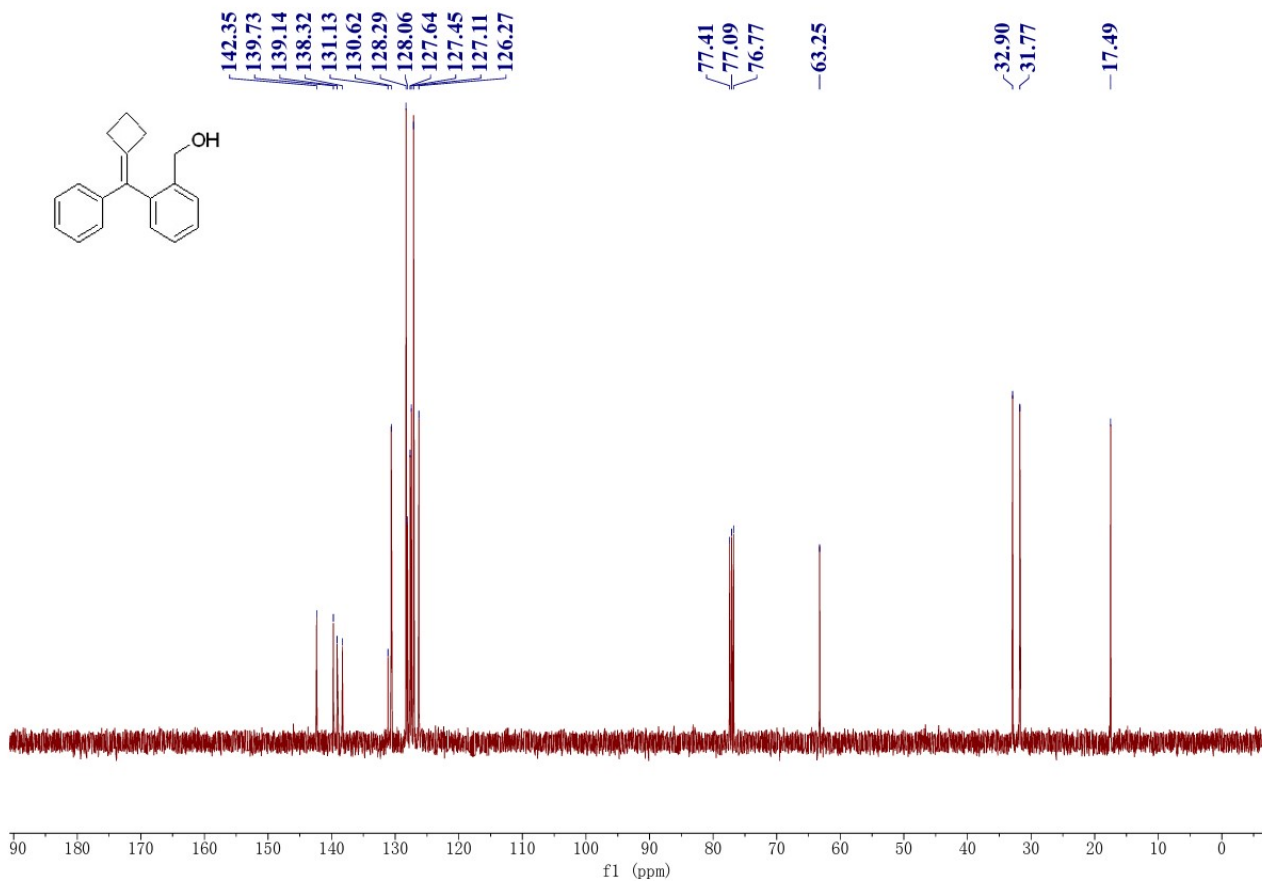

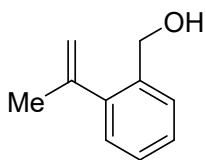

### (2-(prop-1-en-2-yl)phenyl)methanol (1aa)

This is a known compound and its spectroscopic data are consistent with those in the previous literature.<sup>6</sup> CAS number: 180092-32-4. A colorless oil, 501 mg, 90% yield. <sup>1</sup>H NMR (CDCl<sub>3</sub>, TMS, 400 MHz) δ 7.46-7.43 (m, 1H), 7.29-7.25 (m, 2H), 7.18-7.15 (m, 1H), 5.23 (s, 1H), 4.90 (s, 1H), 4.70 (s, 2H), 2.08 (s, 3H), 1.77 (br, 1H). <sup>13</sup>C NMR (CDCl<sub>3</sub>, TMS, 100 MHz) δ 144.7, 142.9, 137.3, 128.1, 128.0, 127.5, 127.2, 115.4, 63.0, 25.1.

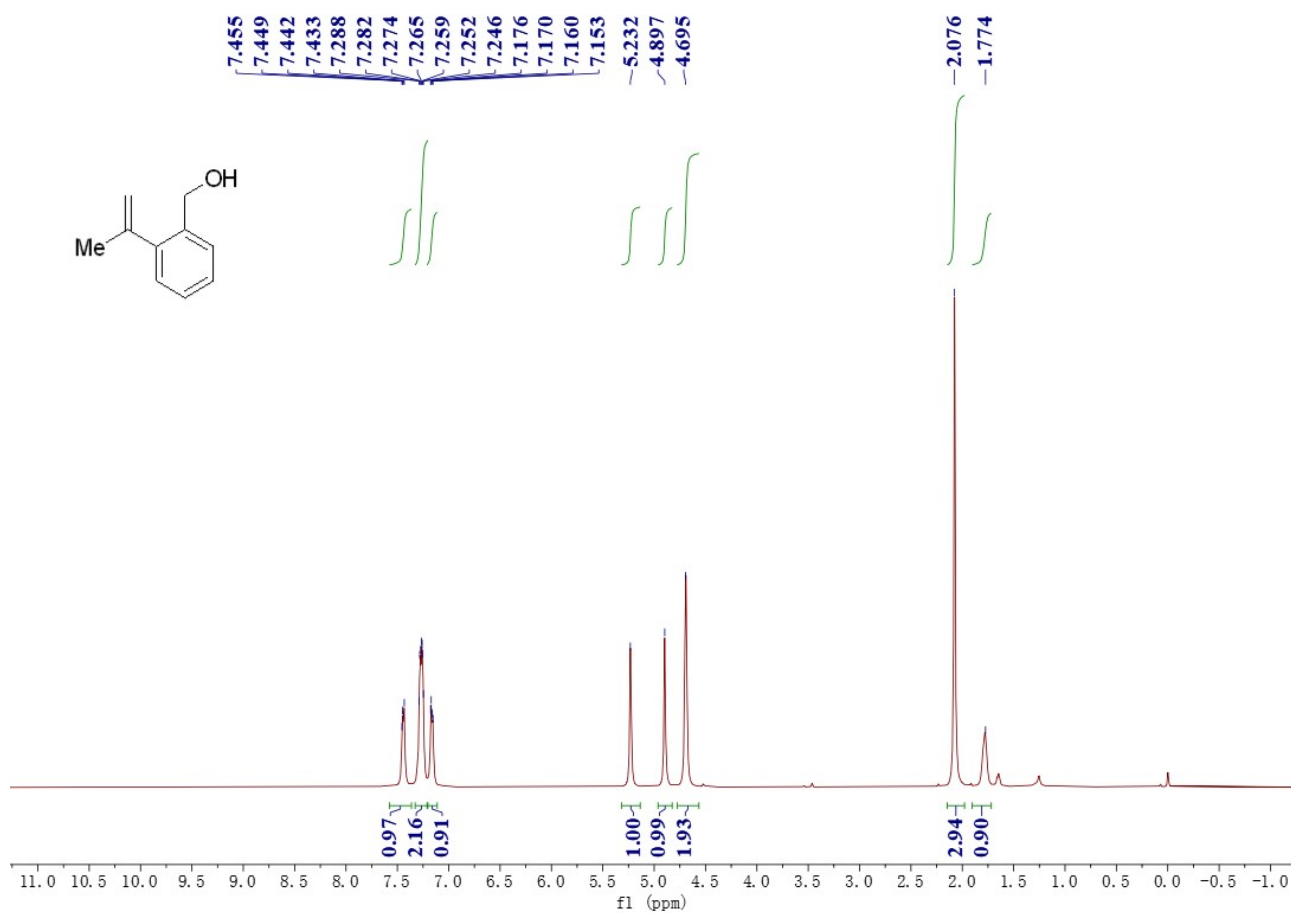

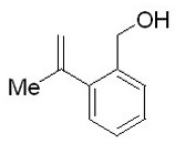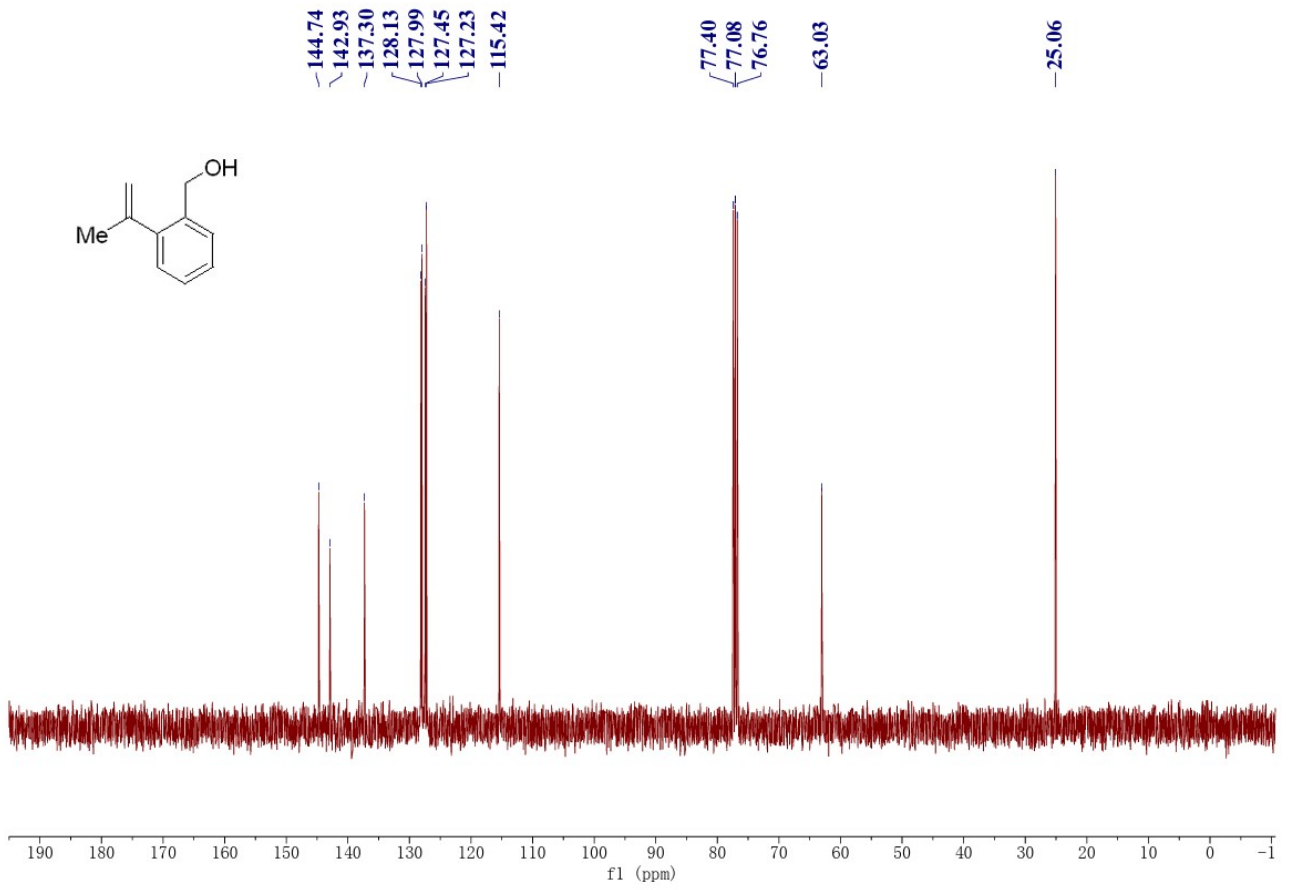

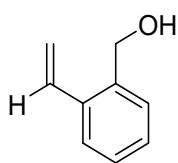

### (2-vinylphenyl)methanol (1ab)

This is a known compound and its spectroscopic data are consistent with those in the previous literature.<sup>8</sup> CAS number: 35106-82-2. A colorless oil, 601 mg, 93% yield. <sup>1</sup>H NMR (CDCl<sub>3</sub>, TMS, 400 MHz) δ 7.54 (d, *J* = 7.2 Hz, 1H), 7.37-7.26 (m, 3H), 7.05 (dd, *J* = 17.4, 10.8 Hz, 2H), 5.71 (d, *J* = 17.4 Hz, 1H), 5.37 (d, *J* = 10.8 Hz, 1H), 4.75 (d, *J* = 4.6 Hz, 2H), 1.84 (br, 1H). <sup>13</sup>C NMR (CDCl<sub>3</sub>, TMS, 100 MHz) δ 137.5, 136.6, 133.7, 128.3, 128.2, 127.9, 125.9, 116.5, 63.4.

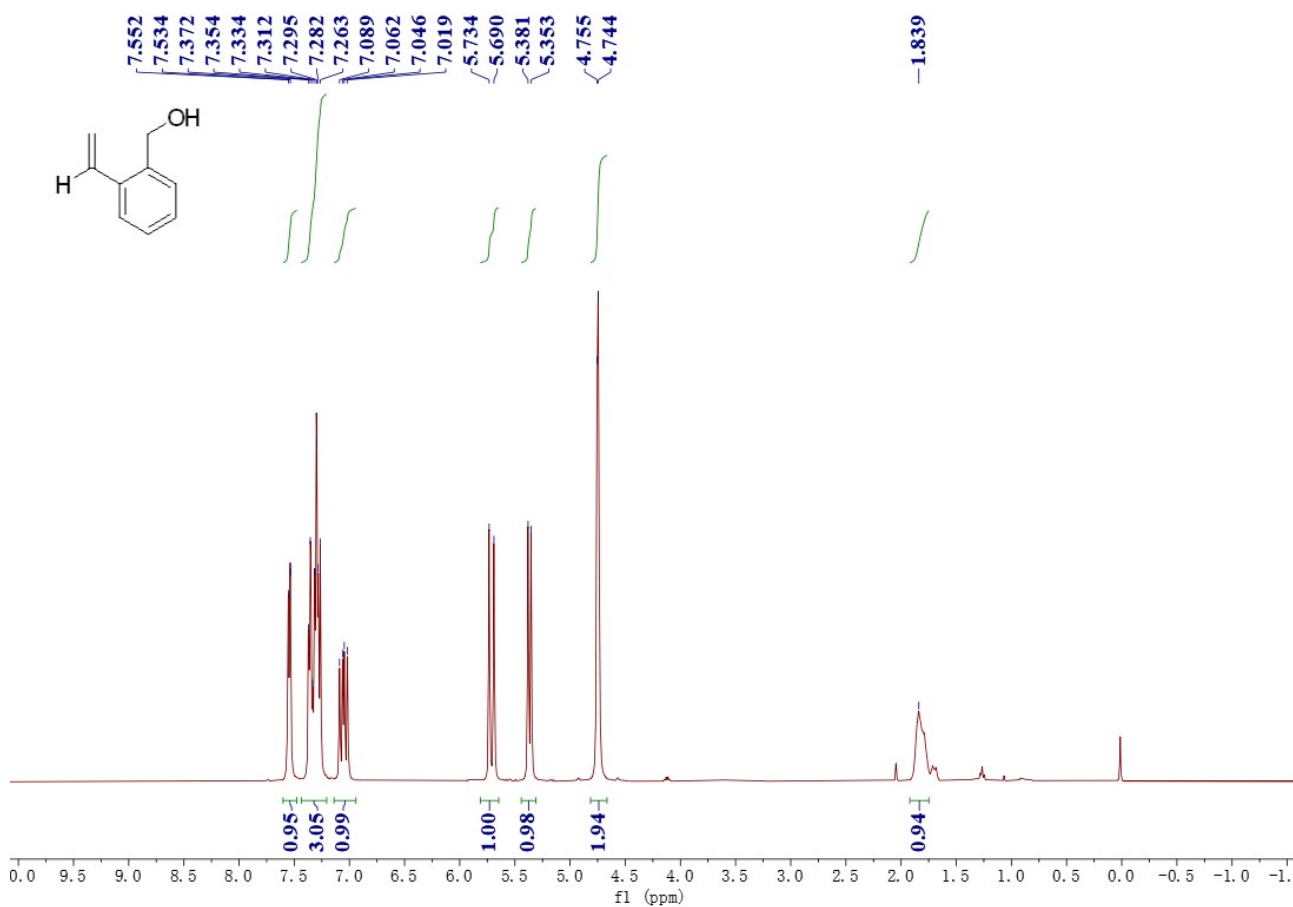



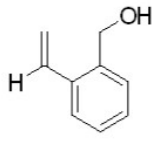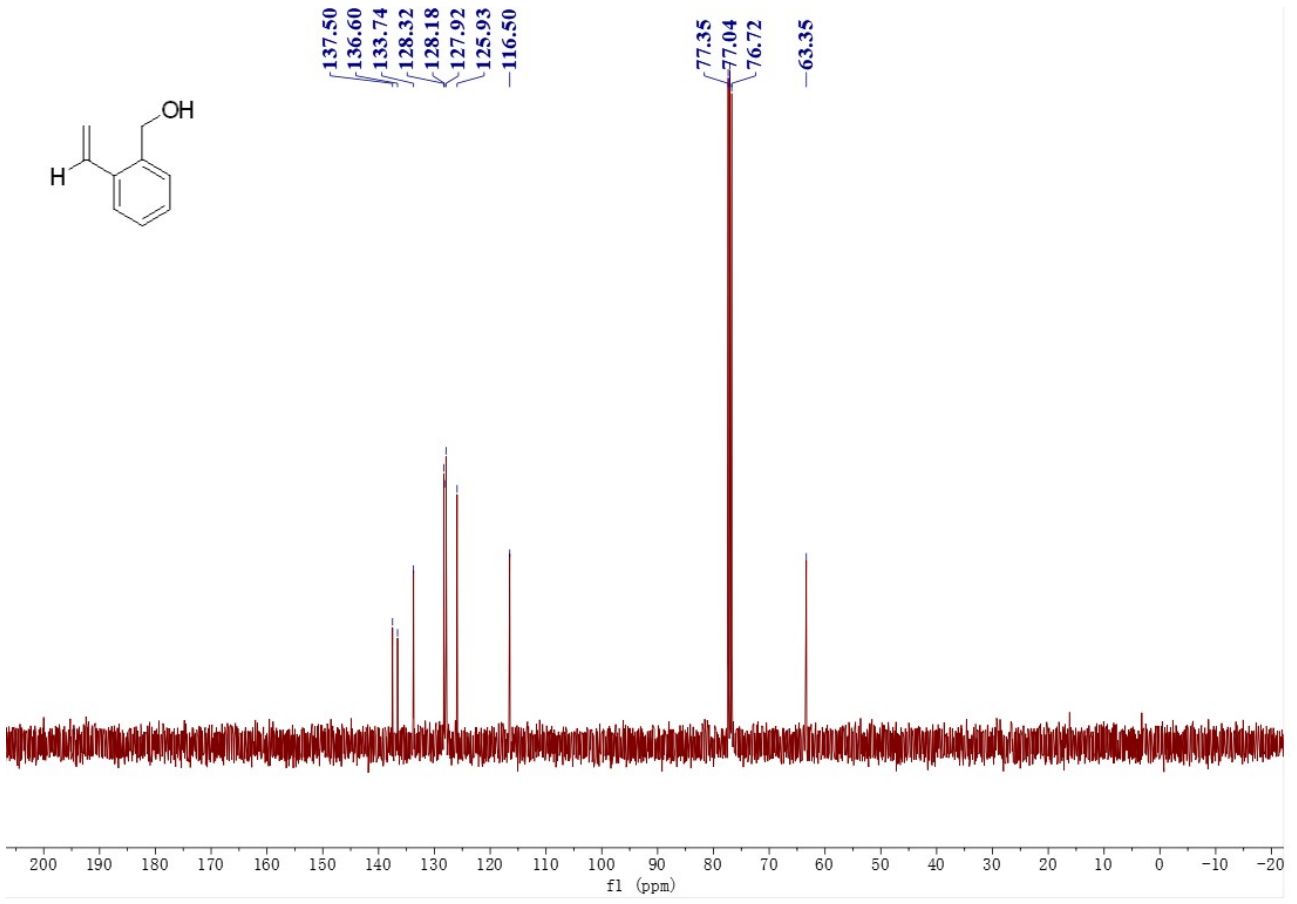

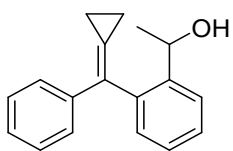

### 1-(2-(cyclopropylidene(phenyl)methyl)phenyl)ethan-1-ol (1ac)

A white solid, M.P.: 115-118 °C, 327 mg, 89% yield.  $^1\text{H}$  NMR ( $\text{CDCl}_3$ , TMS, 400 MHz)  $\delta$  7.62 (d,  $J = 7.8$  Hz, 1H), 7.41-7.37 (m, 3H), 7.31-7.25 (m, 3H), 7.21-7.14 (m, 2H), 4.80 (q,  $J = 6.4$  Hz, 2H), 1.77 (br, 1H), 1.63-1.58 (m, 2H), 1.24 (d,  $J = 6.4$  Hz, 3H), 1.16-1.05 (m, 2H).  $^{13}\text{C}$  NMR ( $\text{CDCl}_3$ , TMS, 100 MHz)  $\delta$  144.1, 140.3, 138.8, 130.2, 128.5, 128.3, 127.9, 127.3, 126.9, 126.3, 125.2, 124.6, 66.8, 24.3, 5.6, 1.5. IR (acetone)  $\nu$  3376, 3054, 2971, 1597, 1493, 1444, 1189, 1073, 904, 695  $\text{cm}^{-1}$ . HRMS (EI) Calcd. for  $\text{C}_{18}\text{H}_{18}\text{O}$  ( $\text{M}^+$ ): 250.1352, Found: 250.1355.

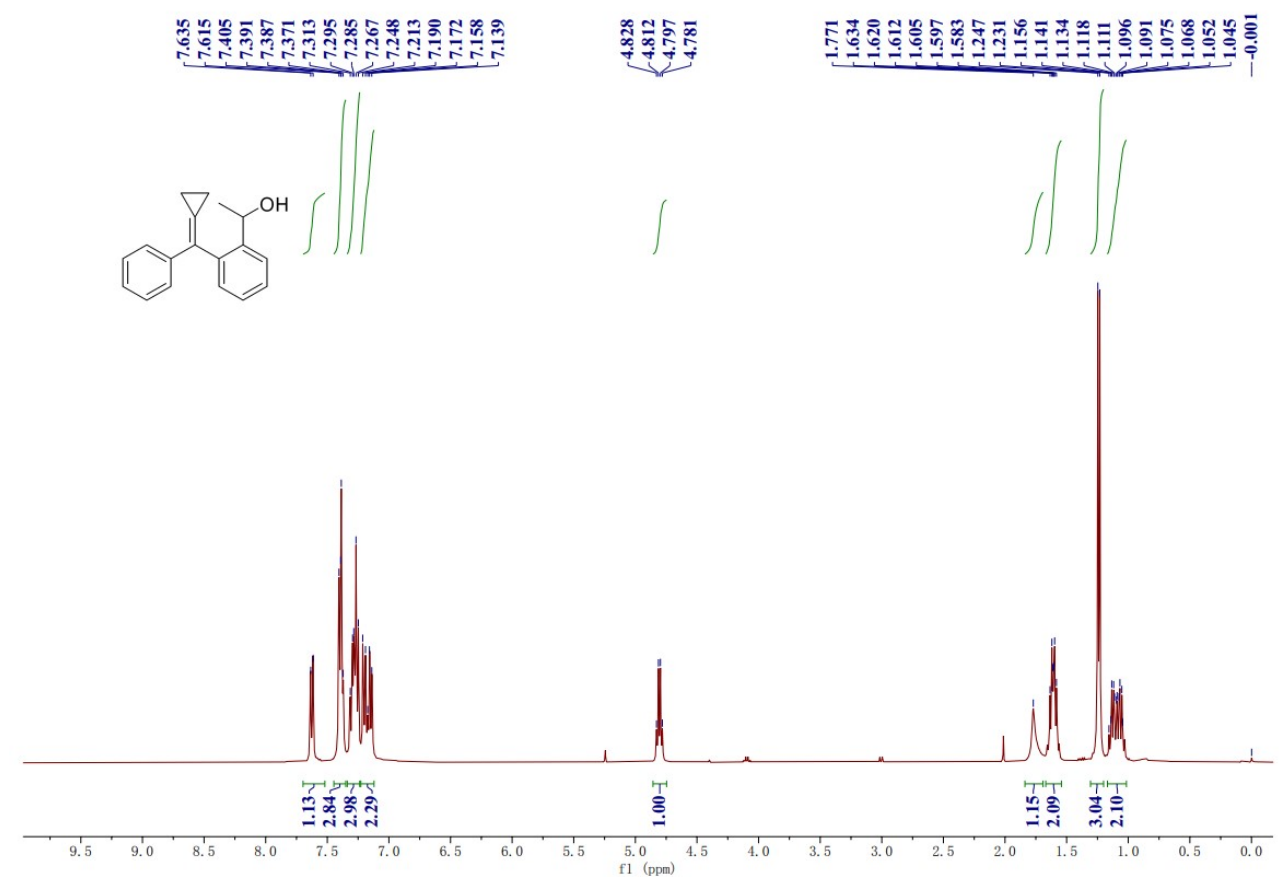

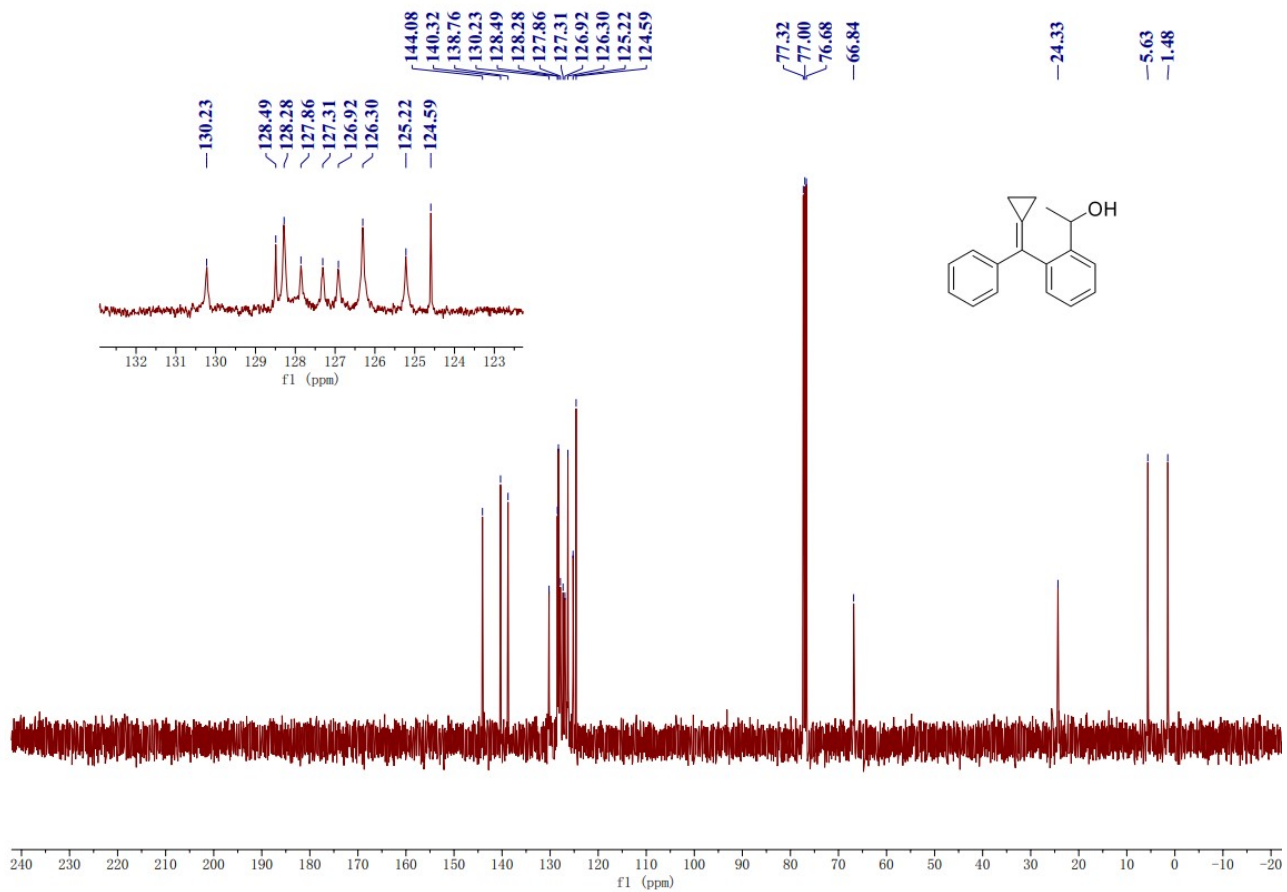

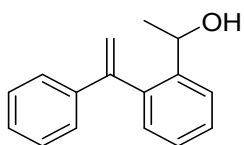

### 1-(2-(1-phenylvinyl)phenyl)ethan-1-ol (1ad)

This is a known compound and its spectroscopic data are consistent with those in the previous literature.<sup>8</sup> CAS number: 2597348-95-1. A white solid, 331 mg, 79% yield. <sup>1</sup>H NMR (CDCl<sub>3</sub>, TMS, 400 MHz) δ 7.60 (d, *J* = 7.8 Hz, 1H), 7.42-7.38 (m, 1H), 7.32-7.19 (m, 7H), 5.81 (d, *J* = 1.4 Hz, 1H), 5.21 (d, *J* = 1.4 Hz, 1H), 4.82 (q, *J* = 6.4 Hz, 1H), 1.68 (br, 1H), 1.26 (d, *J* = 6.4 Hz, 3H). <sup>13</sup>C NMR (CDCl<sub>3</sub>, TMS, 100 MHz) δ 148.4, 143.7, 140.7, 139.6, 130.2, 128.5, 128.3, 128.0, 127.3, 126.4, 125.4, 115.6, 66.7, 24.3.

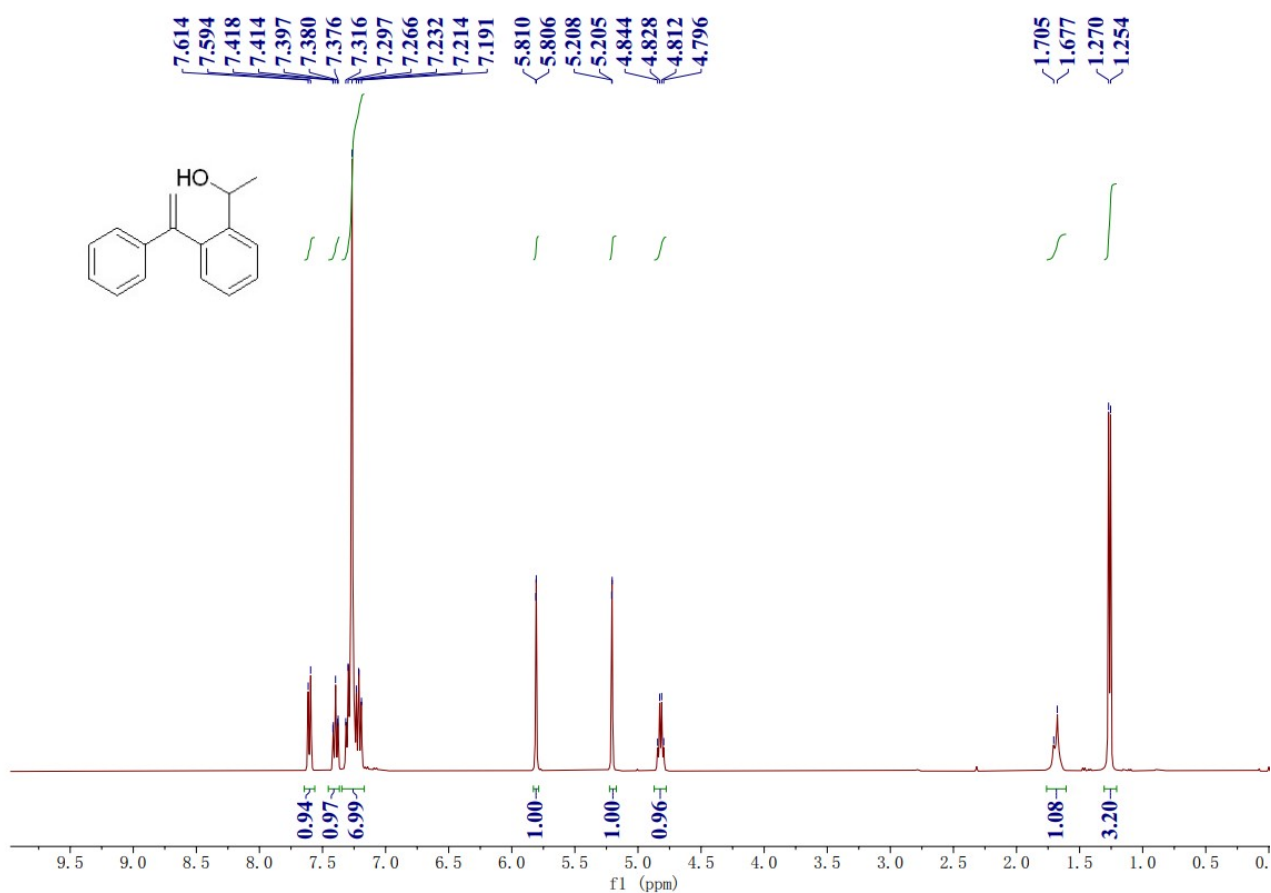

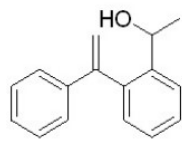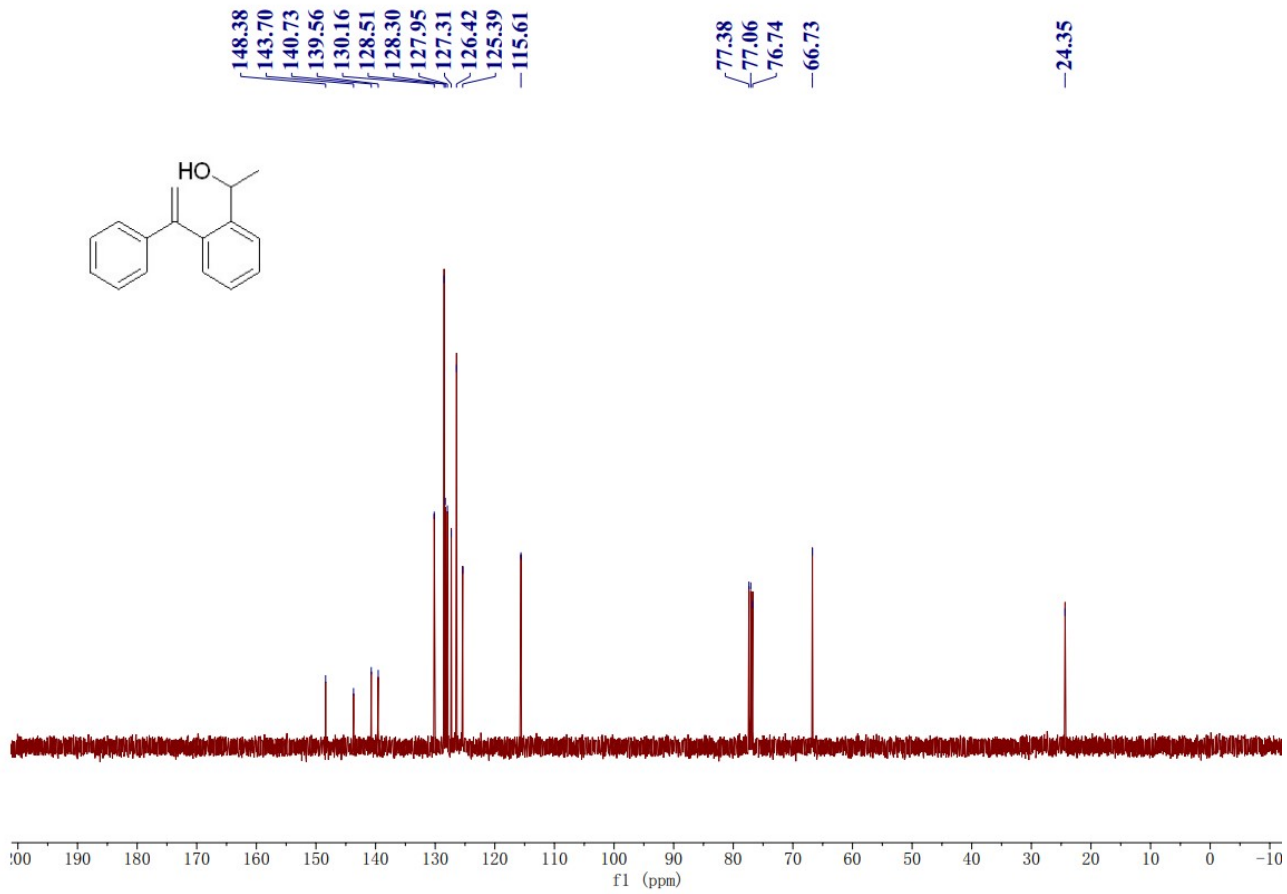

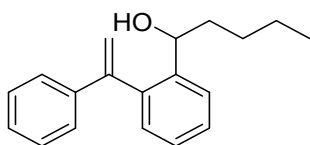

### 1-(2-(1-phenylvinyl)phenyl)pentan-1-ol (1ae)

This is a known compound and its spectroscopic data are consistent with those in the previous literature.<sup>9</sup> CAS number: 2111919-00-5. A colorless oil, 310 mg, 88% yield. <sup>1</sup>H NMR (CDCl<sub>3</sub>, TMS, 400 MHz) δ 7.58 (d, *J* = 7.8 Hz, 1H), 7.42 (t, *J* = 7.5 Hz, 1H), 7.34-7.24 (m, 7H), 5.82 (d, *J* = 1.4 Hz, 1H), 5.23 (d, *J* = 1.4 Hz, 1H), 4.63 (dd, *J* = 8.3, 4.9 Hz, 1H), 1.72 (br, 1H), 1.67-1.60 (m, 1H), 1.57-1.48 (m, 1H), 1.30-1.04 (m, 4H), 0.81 (t, *J* = 7.1 Hz, 3H). <sup>13</sup>C NMR (CDCl<sub>3</sub>, TMS, 100 MHz) δ 148.6, 142.9, 140.9, 139.9, 130.2, 128.4, 128.2, 127.9, 127.2, 126.4, 125.8, 115.6, 70.5, 37.9, 28.1, 22.4, 13.9.

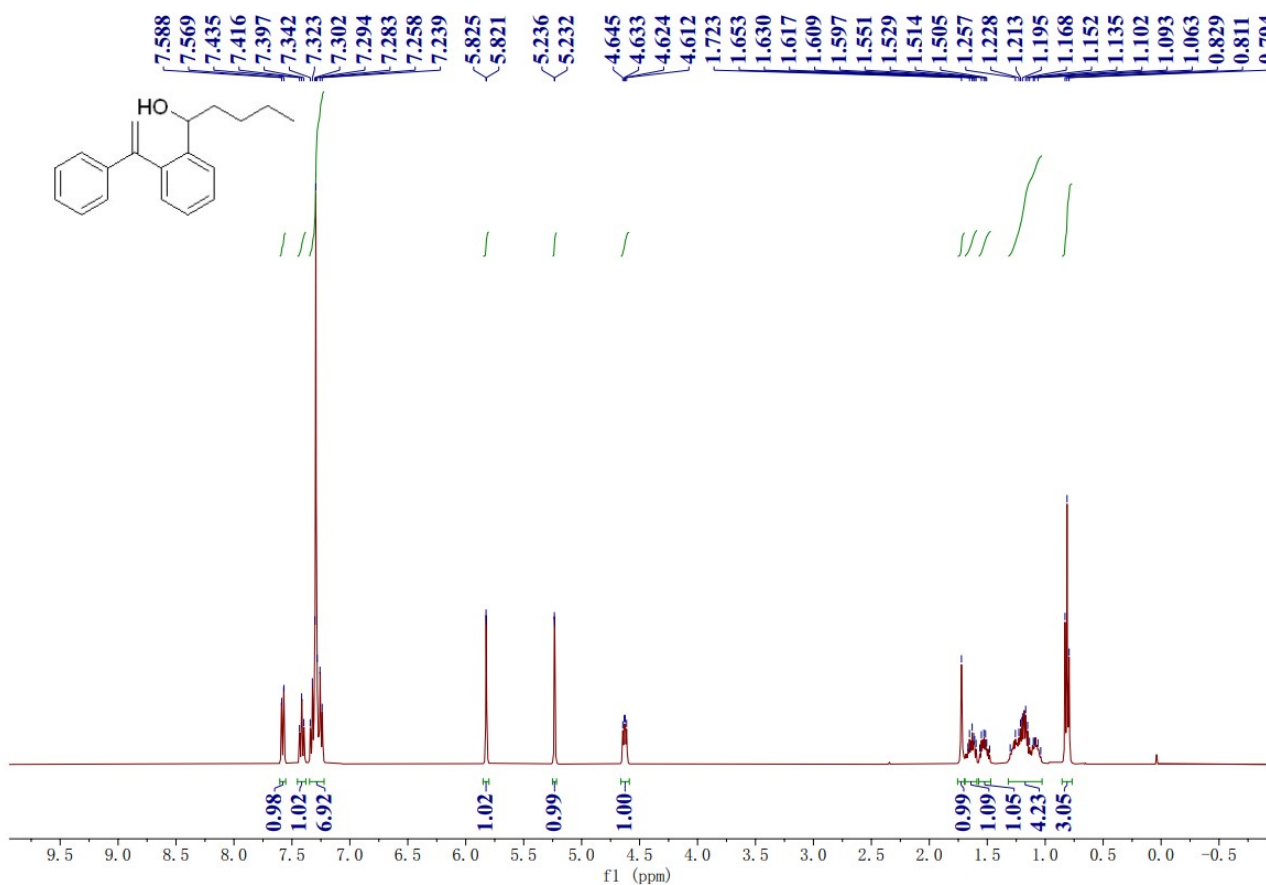

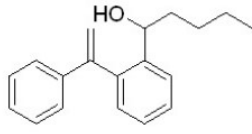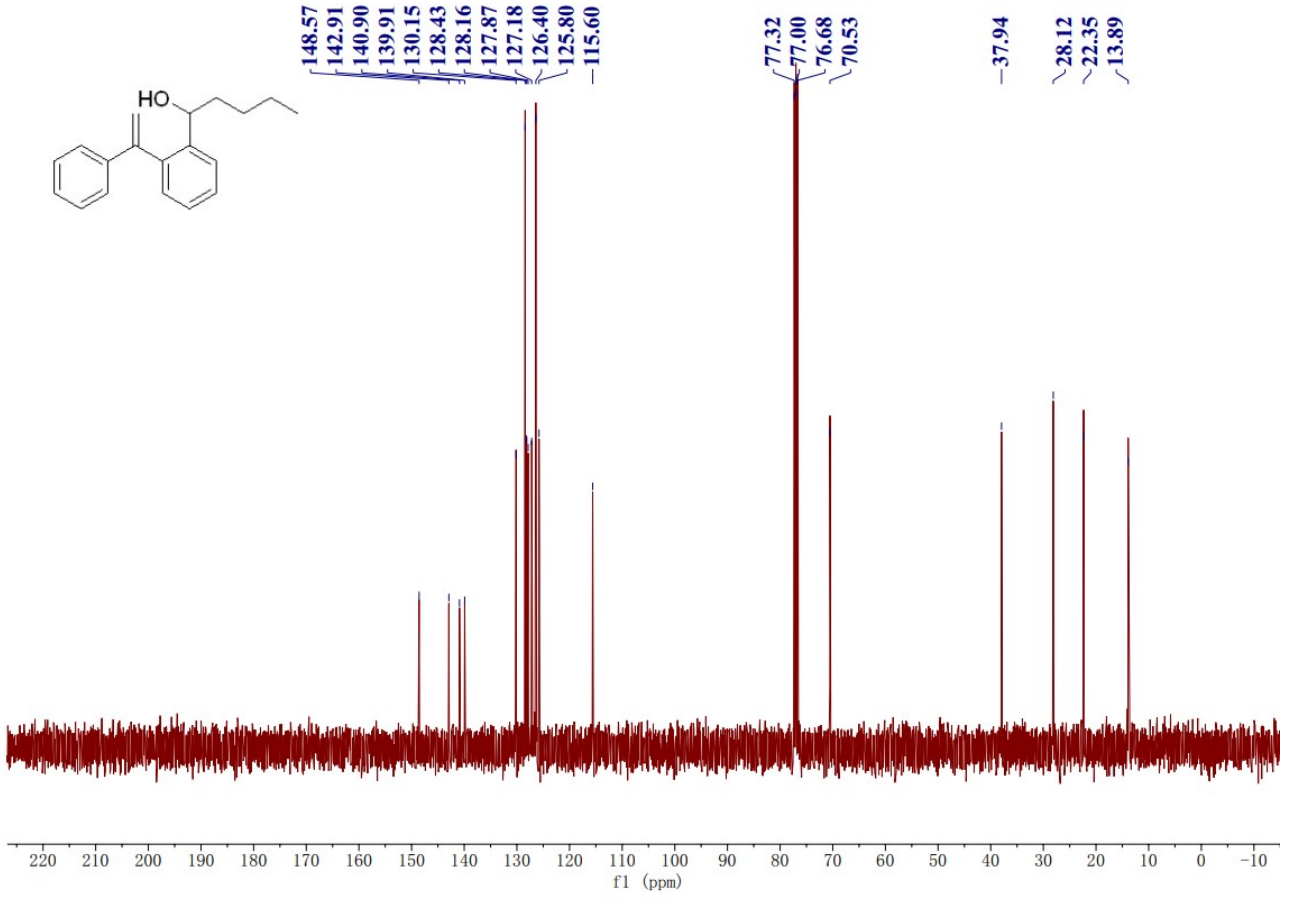

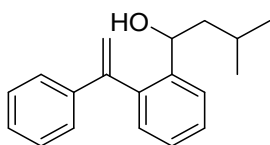

### 3-methyl-1-(2-(1-phenylvinyl)phenyl)butan-1-ol (1af)

This is a known compound and its spectroscopic data are consistent with those in the previous literature.<sup>10</sup> CAS number: 1632462-81-7. A colorless oil, 345 mg, 87% yield. <sup>1</sup>H NMR (CDCl<sub>3</sub>, TMS, 400 MHz) δ 7.57 (d, *J* = 6.4 Hz, 1H), 7.40 (t, *J* = 7.6 Hz, 1H), 7.34-7.22 (m, 7H), 5.80 (d, *J* = 1.4 Hz, 1H), 5.22 (d, *J* = 1.4 Hz, 1H), 4.68 (dd, *J* = 9.0, 3.9 Hz, 1H), 1.66-1.56 (m, 2H), 1.51 (br, 1H), 1.33-1.21 (m, 2H), 0.90-0.84 (m, 1H) 0.79 (d, *J* = 6.2 Hz, 3H), 0.67 (d, *J* = 6.2 Hz, 3H). <sup>13</sup>C NMR (CDCl<sub>3</sub>, TMS, 100 MHz) δ 148.6, 143.2, 140.9, 139.8, 130.3, 128.5, 128.3, 127.9, 127.2, 126.4, 125.9, 115.7, 68.7, 47.5, 24.8, 23.4, 21.5.

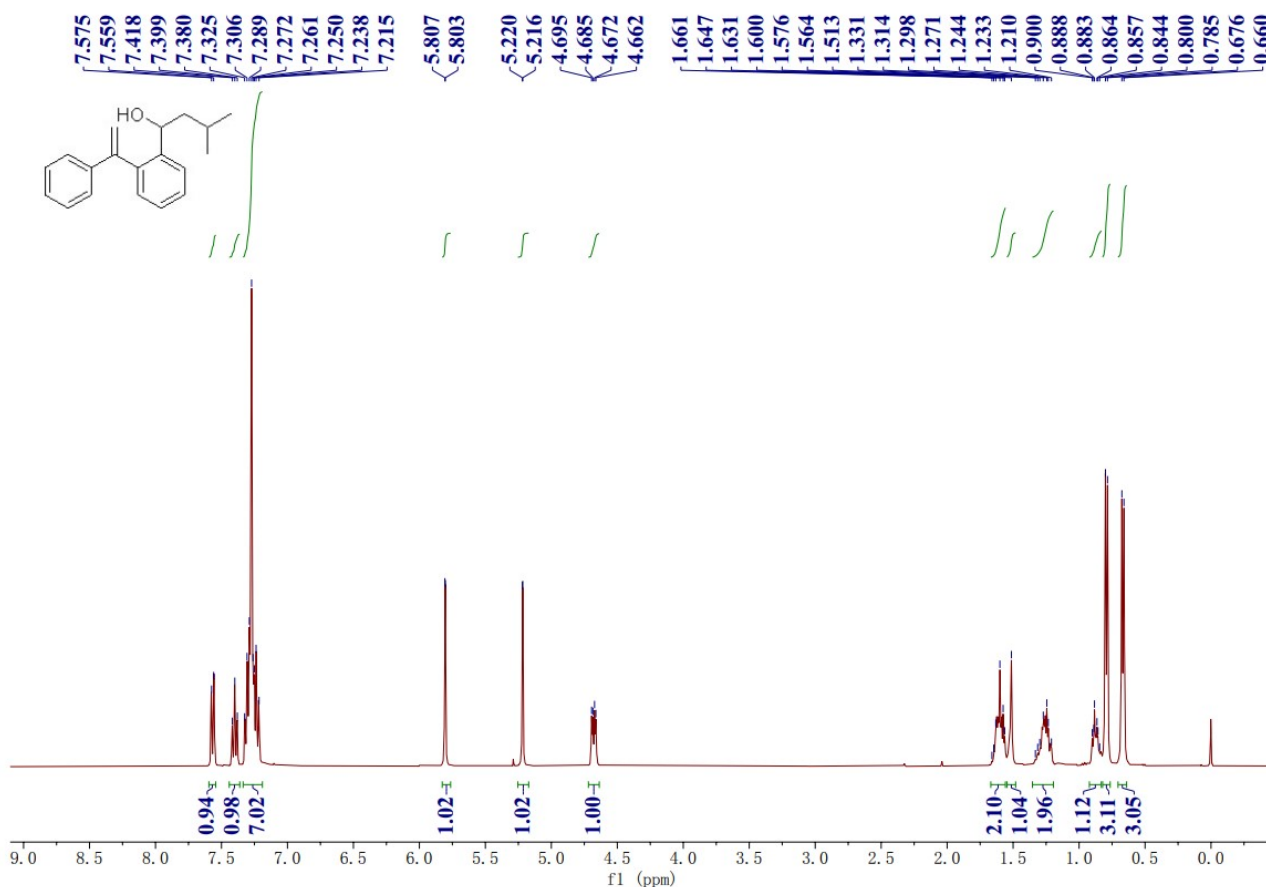



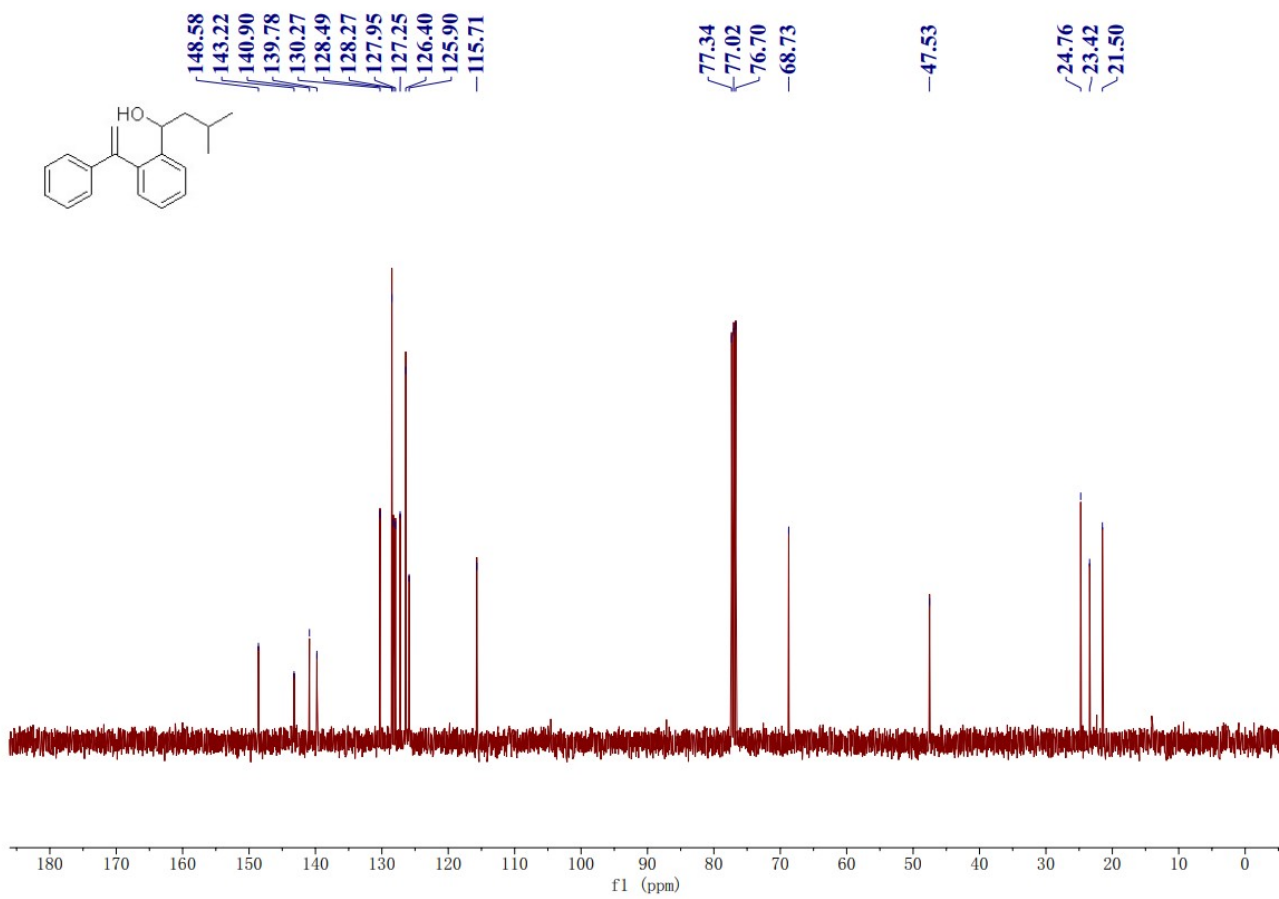

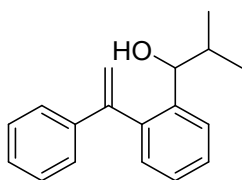

### 2-methyl-1-(2-(1-phenylvinyl)phenyl)propan-1-ol (1ag)

A colorless oil, 201 mg, 81% yield.  $^1\text{H}$  NMR ( $\text{CDCl}_3$ , TMS, 400 MHz)  $\delta$  7.52 (d,  $J = 7.8$  Hz, 1H), 7.41-7.37 (m, 1H), 7.32-7.22 (m, 7H), 5.80 (d,  $J = 1.4$  Hz, 1H), 5.21 (d,  $J = 1.4$  Hz, 1H), 4.28 (d,  $J = 7.6$  Hz, 1H), 1.97-1.89 (m, 1H), 1.49 (br, 1H), 0.91 (d,  $J = 6.6$  Hz, 3H), 0.62 (d,  $J = 6.8$  Hz, 3H).  $^{13}\text{C}$  NMR ( $\text{CDCl}_3$ , TMS, 100 MHz)  $\delta$  148.7, 141.9, 141.0, 140.6, 130.3, 128.5, 128.0, 127.9, 127.2, 126.4, 126.3, 115.8, 75.8, 34.4, 19.6, 18.2. IR (acetone)  $\nu$  3449, 3057, 2929, 1613, 1573, 1493, 1444, 1027, 904, 709  $\text{cm}^{-1}$ . HRMS (EI) Calcd. for  $\text{C}_{18}\text{H}_{18}$  ( $\text{M}-\text{H}_2\text{O}$ ) $^+$ : 234.1403, Found: 234.1403.

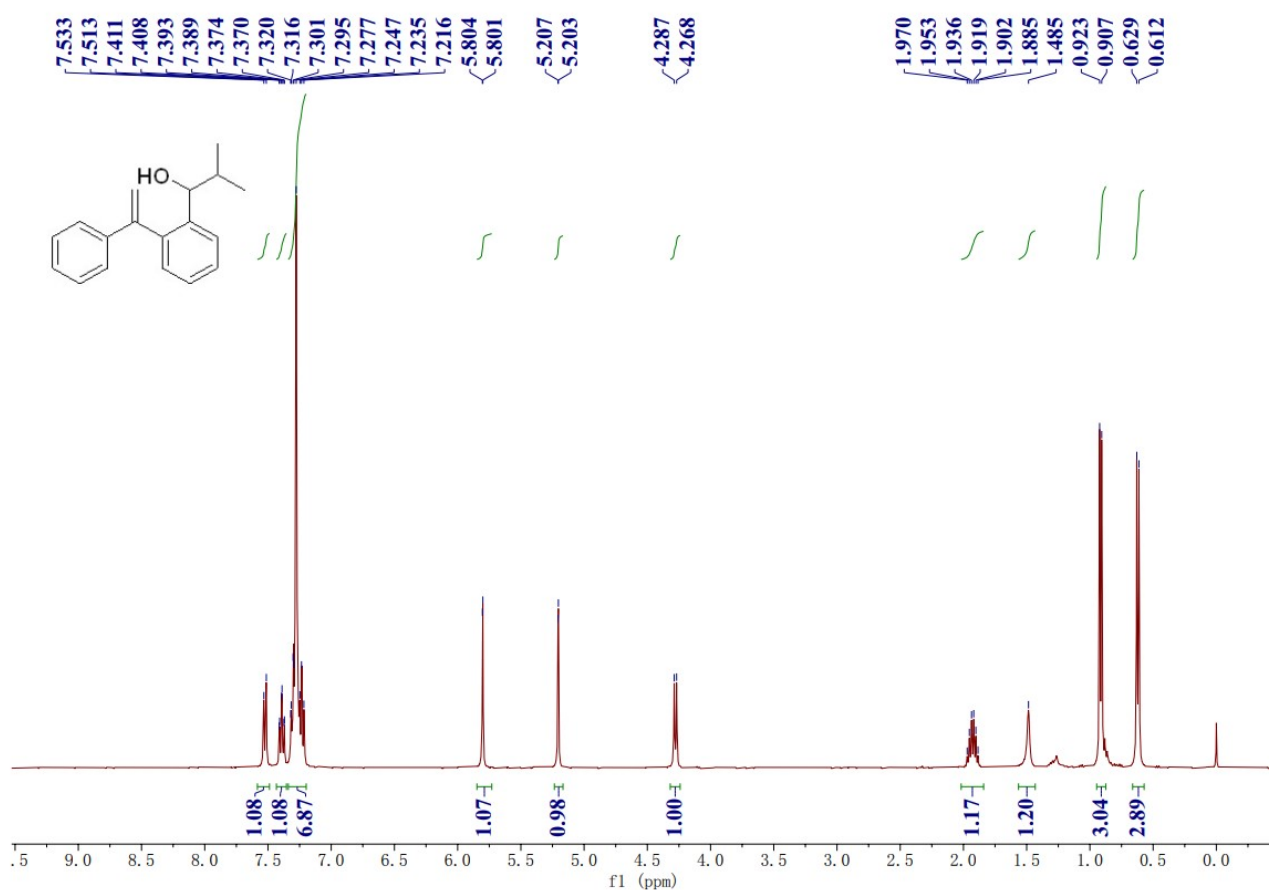

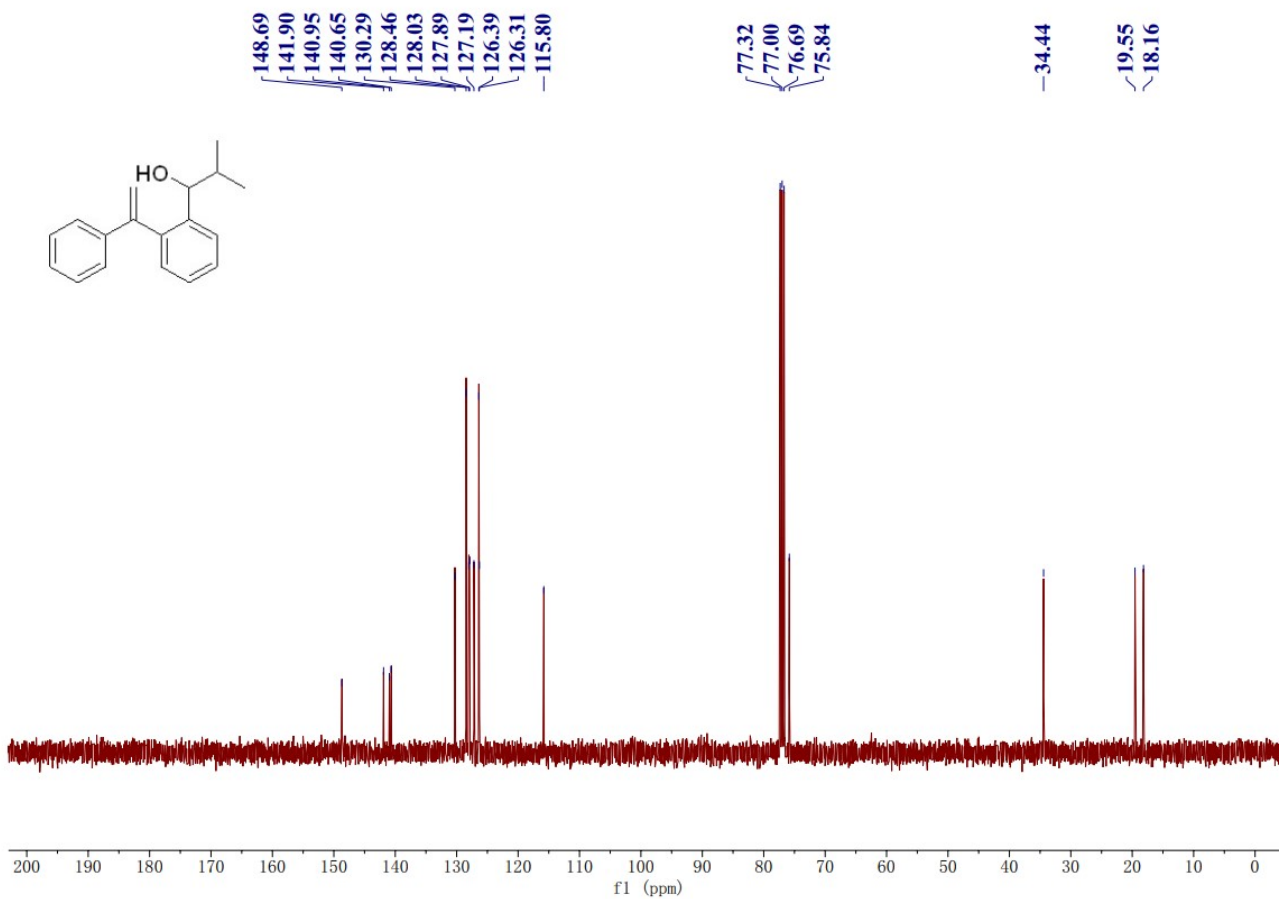

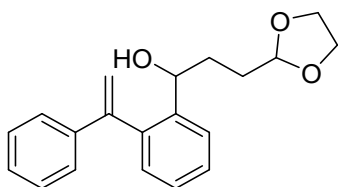

### 3-(1,3-dioxolan-2-yl)-1-(2-(1-phenylvinyl)phenyl)propan-1-ol (1ah)

A colorless oil, 340 mg, 80% yield.  $^1\text{H}$  NMR ( $\text{CDCl}_3$ , TMS, 400 MHz)  $\delta$  7.55 (d,  $J = 7.7$  Hz, 1H), 7.36 (td,  $J = 7.5$ , 1.5 Hz, 1H), 7.28-7.17 (m, 7H), 5.77 (d,  $J = 1.4$  Hz, 1H), 5.19 (d,  $J = 1.4$  Hz, 1H), 4.70 (t,  $J = 4.3$  Hz, 1H), 4.62 (dd,  $J = 8.3$ , 4.0 Hz, 1H), 3.90-3.83 (m, 2H), 3.79-3.73 (m, 2H), 2.19 (br, 1H), 1.76-1.48 (m, 4H).  $^{13}\text{C}$  NMR ( $\text{CDCl}_3$ , TMS, 100 MHz)  $\delta$  148.5, 142.5, 140.8, 139.8, 130.2, 128.4, 128.2, 127.9, 127.2, 126.4, 125.8, 115.8, 104.2, 70.3, 64.9, 64.8, 32.4, 30.2. IR (acetone)  $\nu$  3425, 3059, 2928, 1614, 1573, 1494, 1407, 1322, 906, 770  $\text{cm}^{-1}$ . HRMS (FI) Calcd. for  $\text{C}_{20}\text{H}_{22}\text{O}_3$  ( $\text{M}^+$ ): 310.1563, Found: 310.1560.

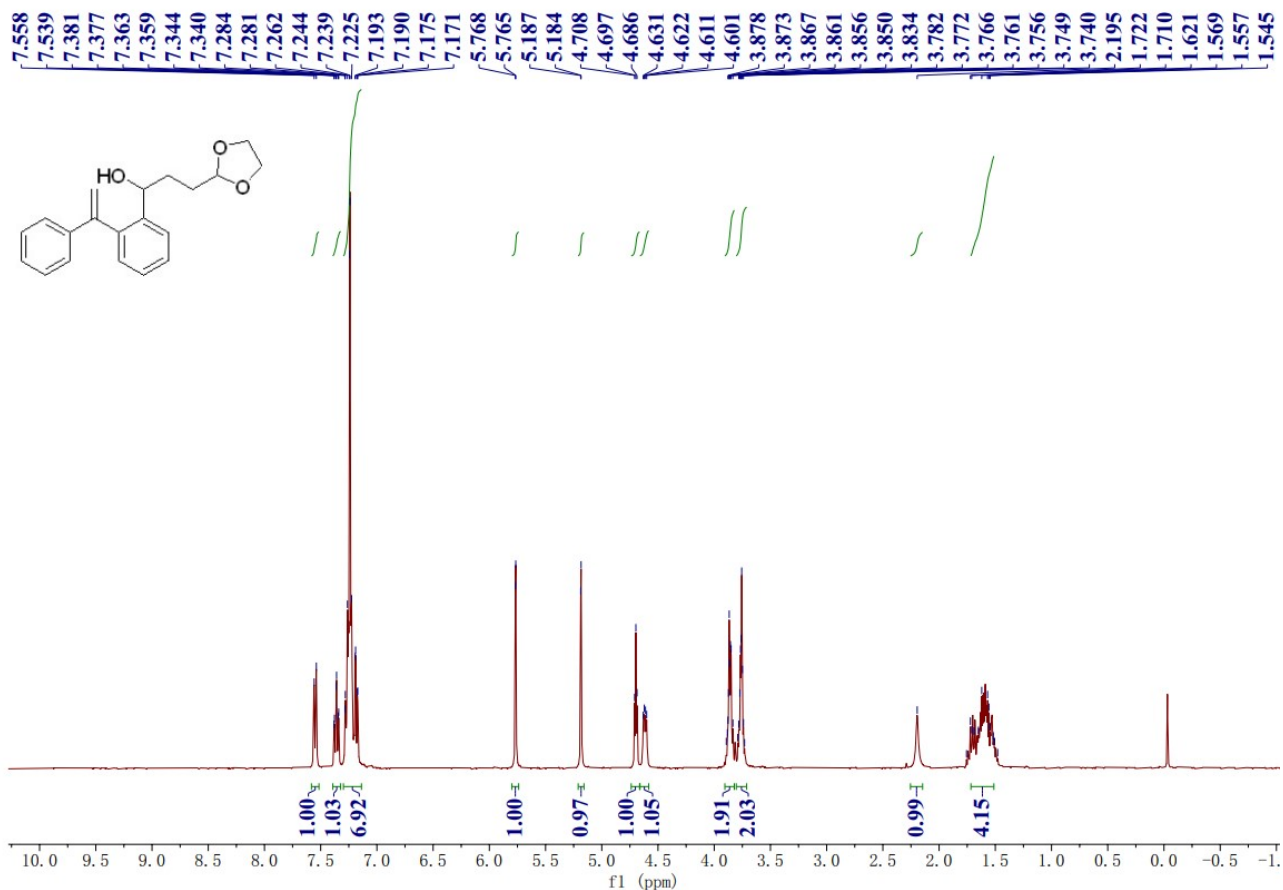

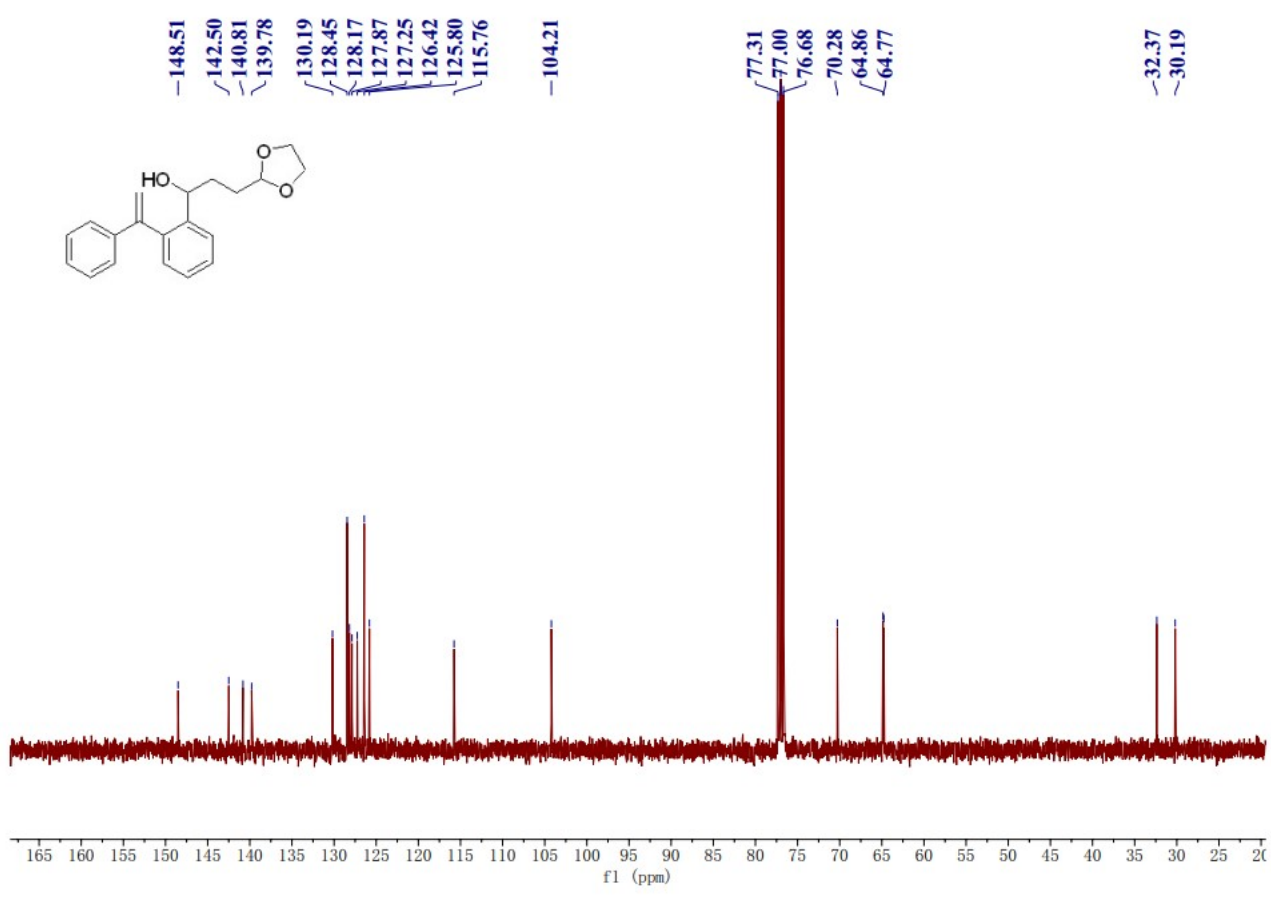

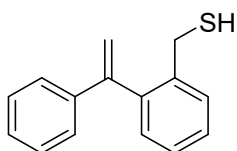

### (2-(1-phenylvinyl)phenyl)methanethiol (1a)

A colorless oil, 203 mg, 68% yield.  $^1\text{H}$  NMR (DMSO- $d_6$ , TMS, 400 MHz)  $\delta$  7.34-7.20 (m, 6H), 7.18-7.14 (m, 2H), 7.13-7.07 (m, 1H), 5.81 (d,  $J = 1.2$  Hz, 1H), 5.14 (d,  $J = 1.2$  Hz, 1H), 3.52 (s, 2H), 3.32 (s, 1H).  $^{13}\text{C}$  NMR (CDCl $_3$ , TMS, 100 MHz)  $\delta$  147.7, 141.6, 140.5, 135.1, 130.52, 130.48, 128.4, 127.8, 127.6, 127.4, 126.7, 116.2, 41.6. IR (acetone)  $\nu$  3400, 3058, 2929, 1610, 1551, 1493, 1407, 1321, 906, 777  $\text{cm}^{-1}$ . HRMS (EI) Calcd. for C $_{15}$ H $_{14}$ S (M $^+$ ): 226.0811, Found: 226.0807.

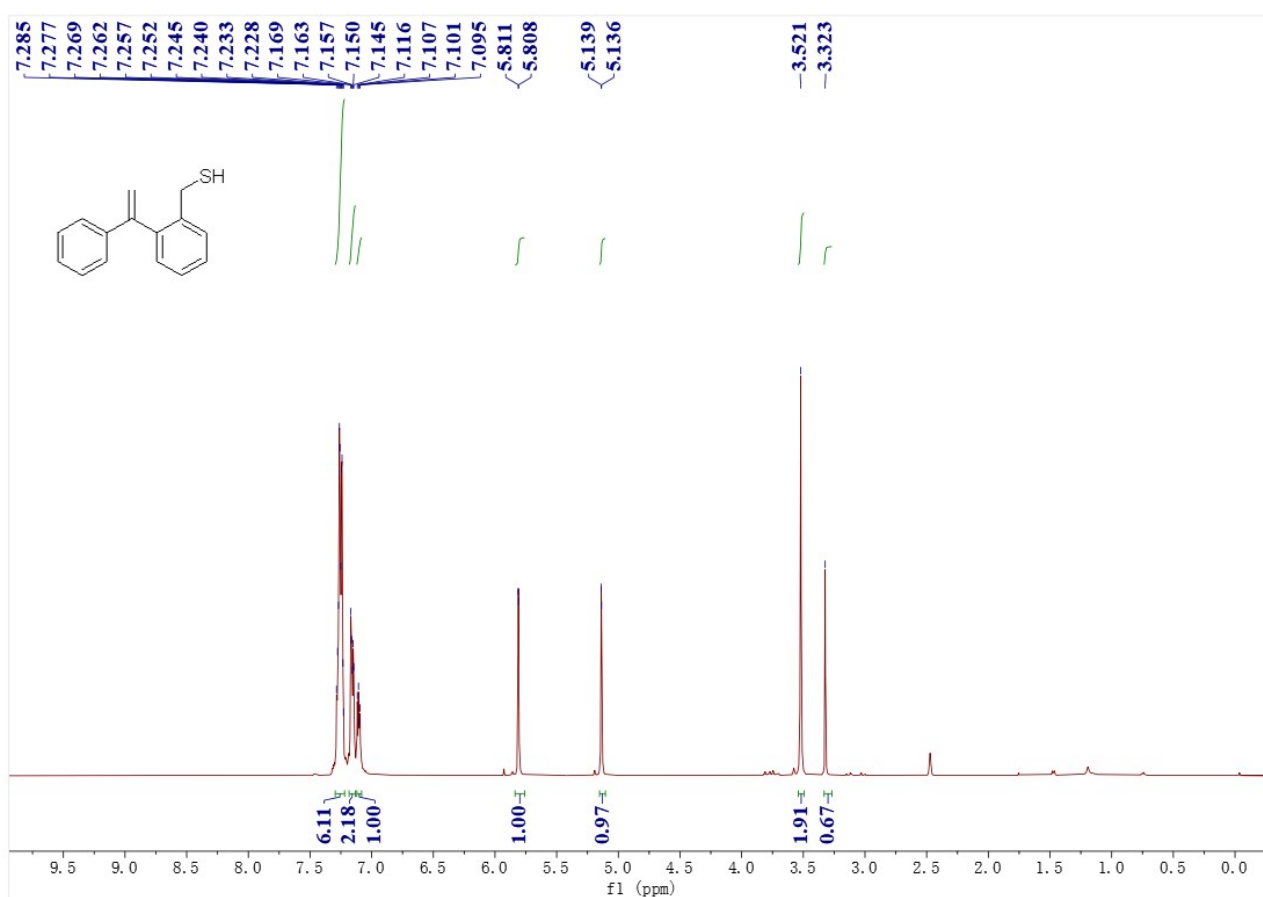

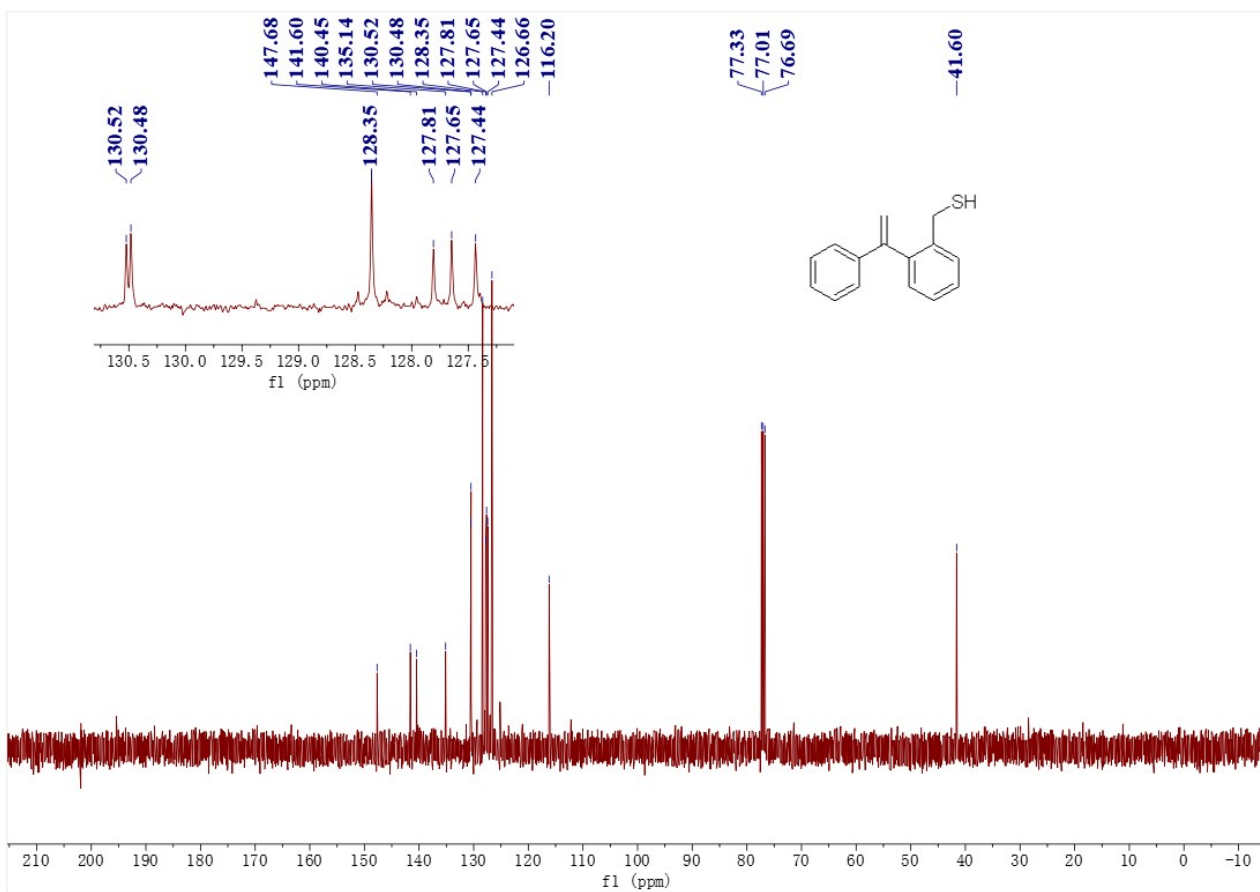

## 7. Spectroscopic data of products

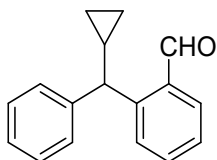

### 2-(cyclopropyl(phenyl)methyl)benzaldehyde (2a)

A white solid, M.P.: 67-69 °C, 44.4 mg, 94% yield. <sup>1</sup>H NMR (CDCl<sub>3</sub>, TMS, 400 MHz) δ 10.19 (s, 1H), 7.81 (dd, *J* = 7.6, 1.6 Hz, 1H), 7.65 (dd, *J* = 8.0, 1.4 Hz, 1H), 7.58 (td, *J* = 7.6, 1.6 Hz, 1H), 7.39 (t, *J* = 7.6 Hz, 1H), 7.26-7.24 (m, 4H), 7.18-7.15 (m, 1H), 4.33 (d, *J* = 9.4 Hz, 1H), 1.44-1.35 (m, 1H), 0.79-0.72, (m, 1H), 0.64-0.57 (m, 1H), 0.47-0.41 (m, 1H), 0.27-0.21 (m, 1H). <sup>13</sup>C NMR (CDCl<sub>3</sub>, TMS, 100 MHz) δ 192.3, 147.3, 144.6, 133.8, 133.6, 131.6, 129.5, 128.5, 128.3, 128.2, 126.7, 126.2, 49.6, 17.2, 6.3, 4.6. IR (acetone) ν 3064, 3001, 2860, 1690, 1597, 1493, 1451, 1200, 871, 751 cm<sup>-1</sup>. Calcd. for C<sub>17</sub>H<sub>16</sub>O (M<sup>+</sup>): 236.1196, Found: 236.1202.

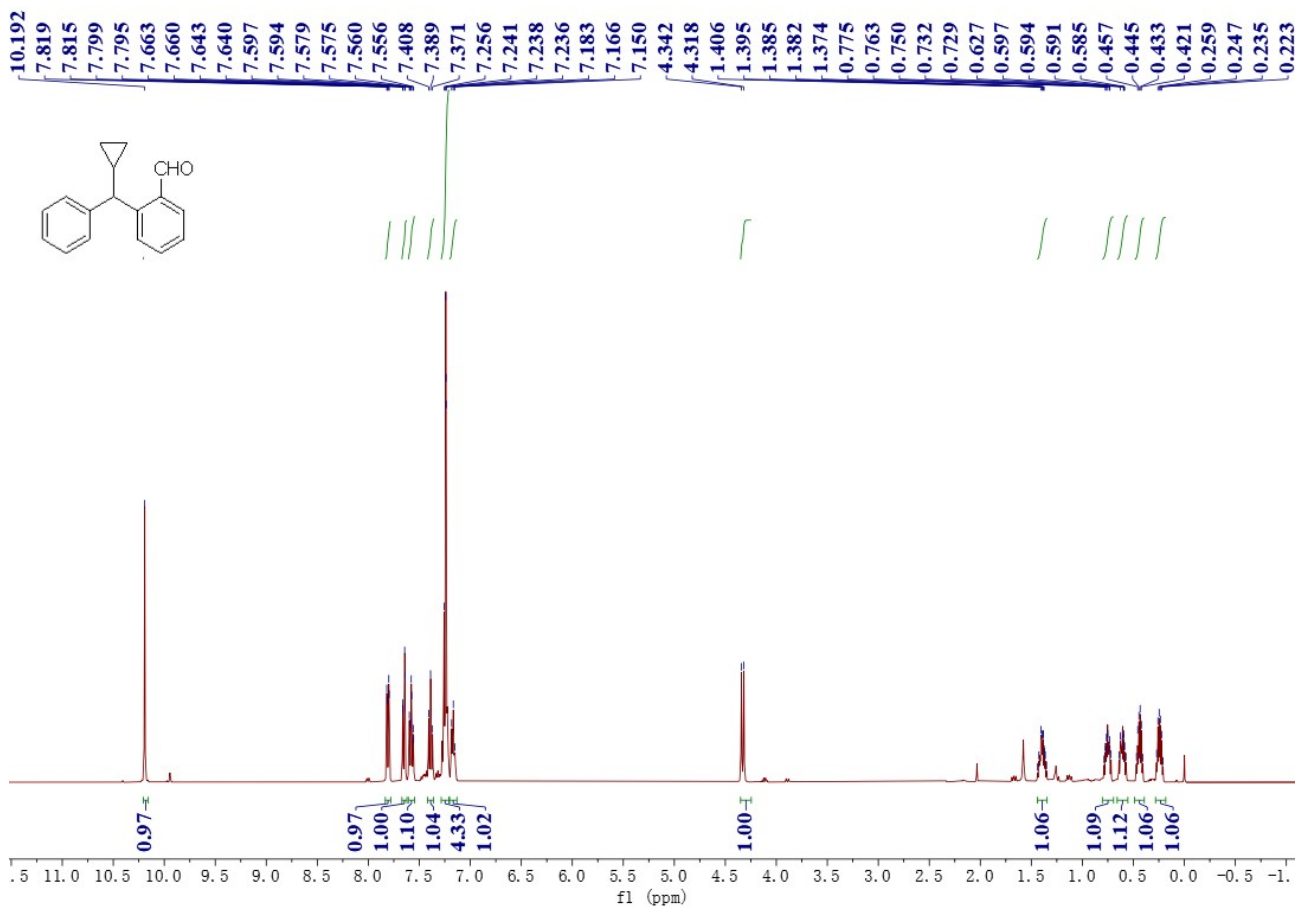



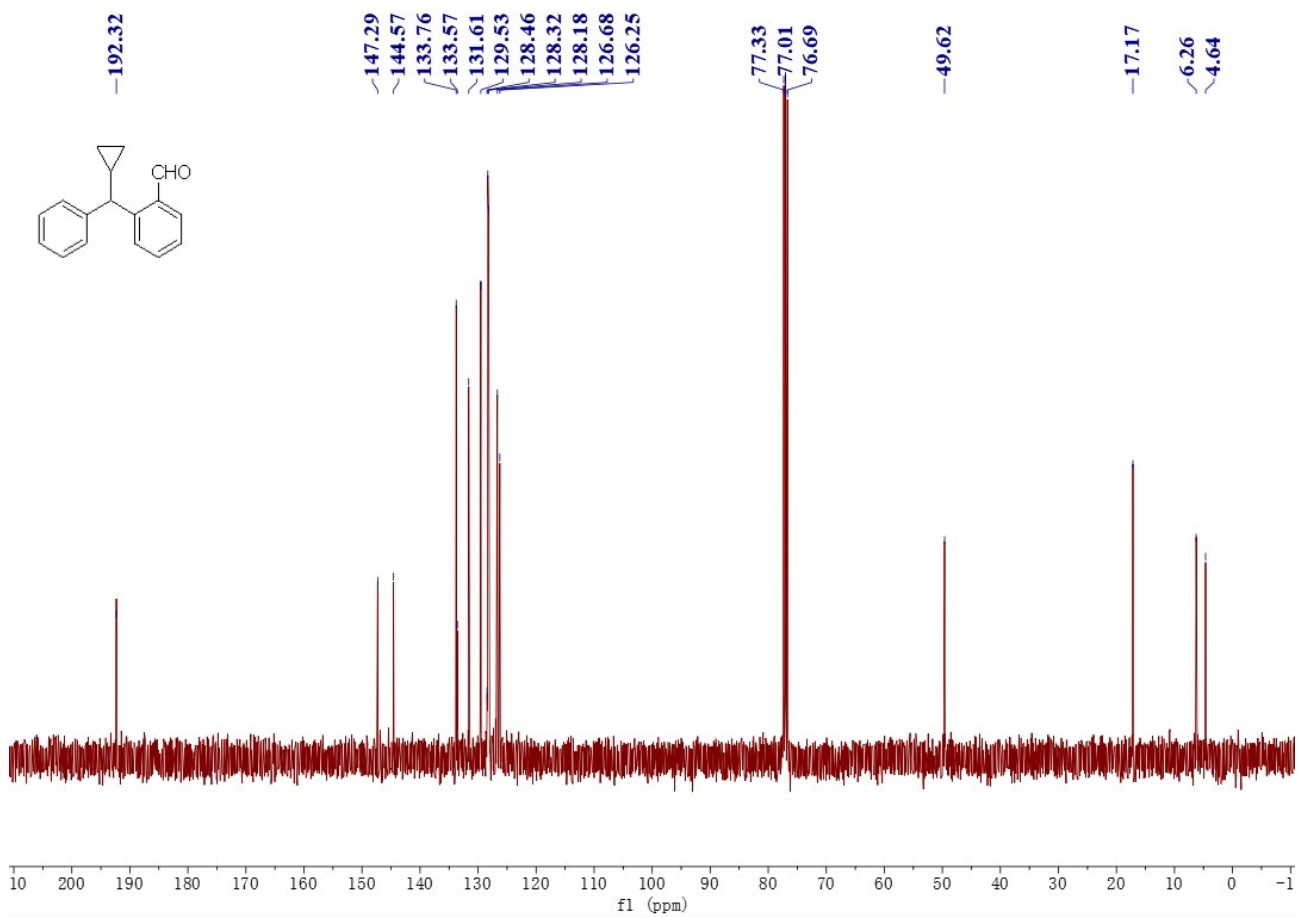

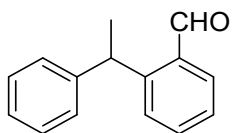

## 2-(1-phenylethyl)benzaldehyde (2b)

This is a known compound and its spectroscopic data are consistent with those in the previous literature.<sup>11</sup> CAS number: 61608-90-0. A colorless oil. 35.3 mg, 84% yield. <sup>1</sup>H NMR (CDCl<sub>3</sub>, TMS, 400 MHz) δ 10.31 (s, 1H), 7.82 (d, *J* = 7.2 Hz, 1H), 7.53 (td, *J* = 7.6, 1.6 Hz, 1H), 7.37 (t, *J* = 7.6 Hz, 2H), 7.30-7.16 (m, 5H), 5.24 (q, *J* = 7.2 Hz, 1H), 1.67 (d, *J* = 7.2 Hz, 3H). <sup>13</sup>C NMR (CDCl<sub>3</sub>, TMS, 100 MHz) δ 192.4, 148.6, 145.6, 133.9, 133.3, 132.0, 128.5, 128.4, 127.8, 126.6, 126.2, 38.9, 22.2.

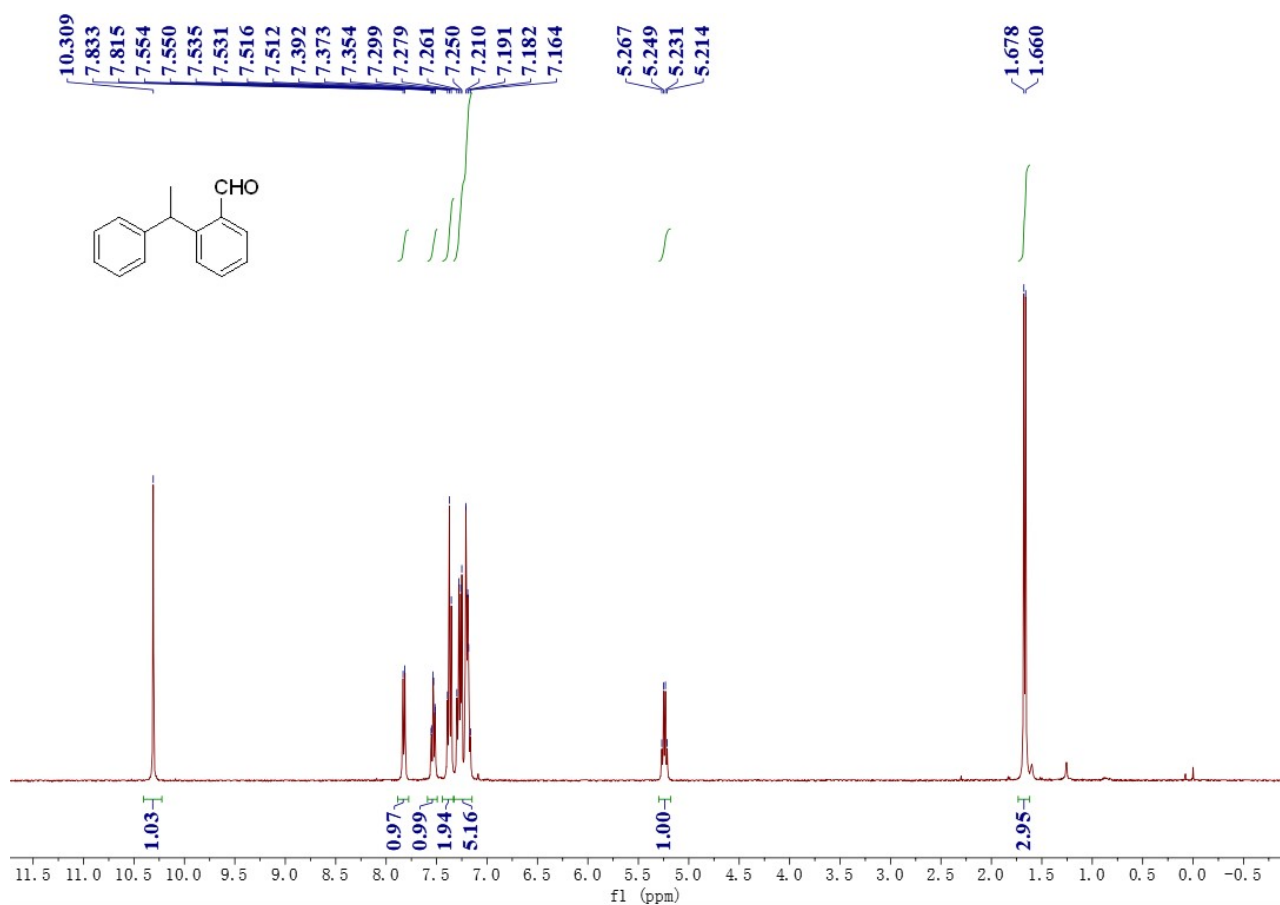

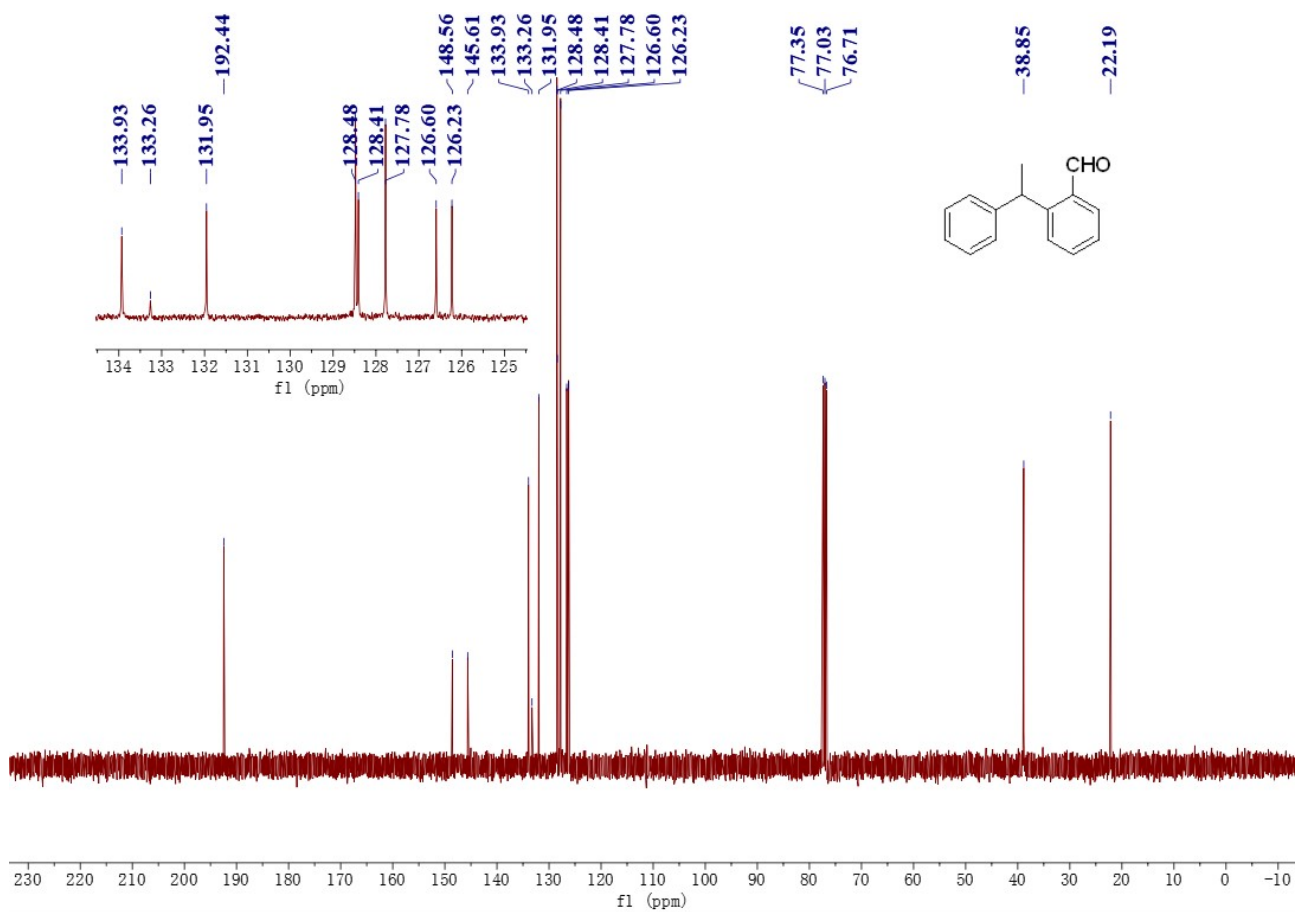

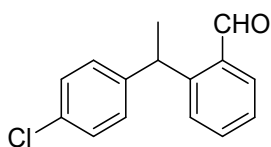

### 2-(1-(4-chlorophenyl)ethyl)benzaldehyde (2c)

A colorless oil. 47.0 mg, 96% yield.  $^1\text{H}$  NMR ( $\text{CDCl}_3$ , TMS, 400 MHz)  $\delta$  10.26 (s, 1H), 7.83 (dd,  $J = 7.6, 1.6$  Hz, 1H), 7.56 (td,  $J = 7.6, 1.6$  Hz, 1H), 7.42 (td,  $J = 7.6, 1.2$  Hz, 1H), 7.36 (d,  $J = 7.8$  Hz, 1H), 7.28-7.24 (m, 2H), 7.17-7.15 (m, 2H), 5.28 (q,  $J = 7.2$  Hz, 1H), 1.66 (d,  $J = 7.2$  Hz, 3H).  $^{13}\text{C}$  NMR ( $\text{CDCl}_3$ , TMS, 100 MHz)  $\delta$  192.6, 147.9, 144.2, 134.0, 133.2, 133.0, 131.9, 129.2, 128.5, 128.3, 126.8, 38.2, 22.1. IR (acetone)  $\nu$  3061, 2962, 2876, 1693, 1598, 1489, 1396, 1197, 908, 835  $\text{cm}^{-1}$ . Calcd. for  $\text{C}_{15}\text{H}_{13}\text{ClO}$  ( $\text{M}^+$ ): 244.0649, Found: 244.0650.

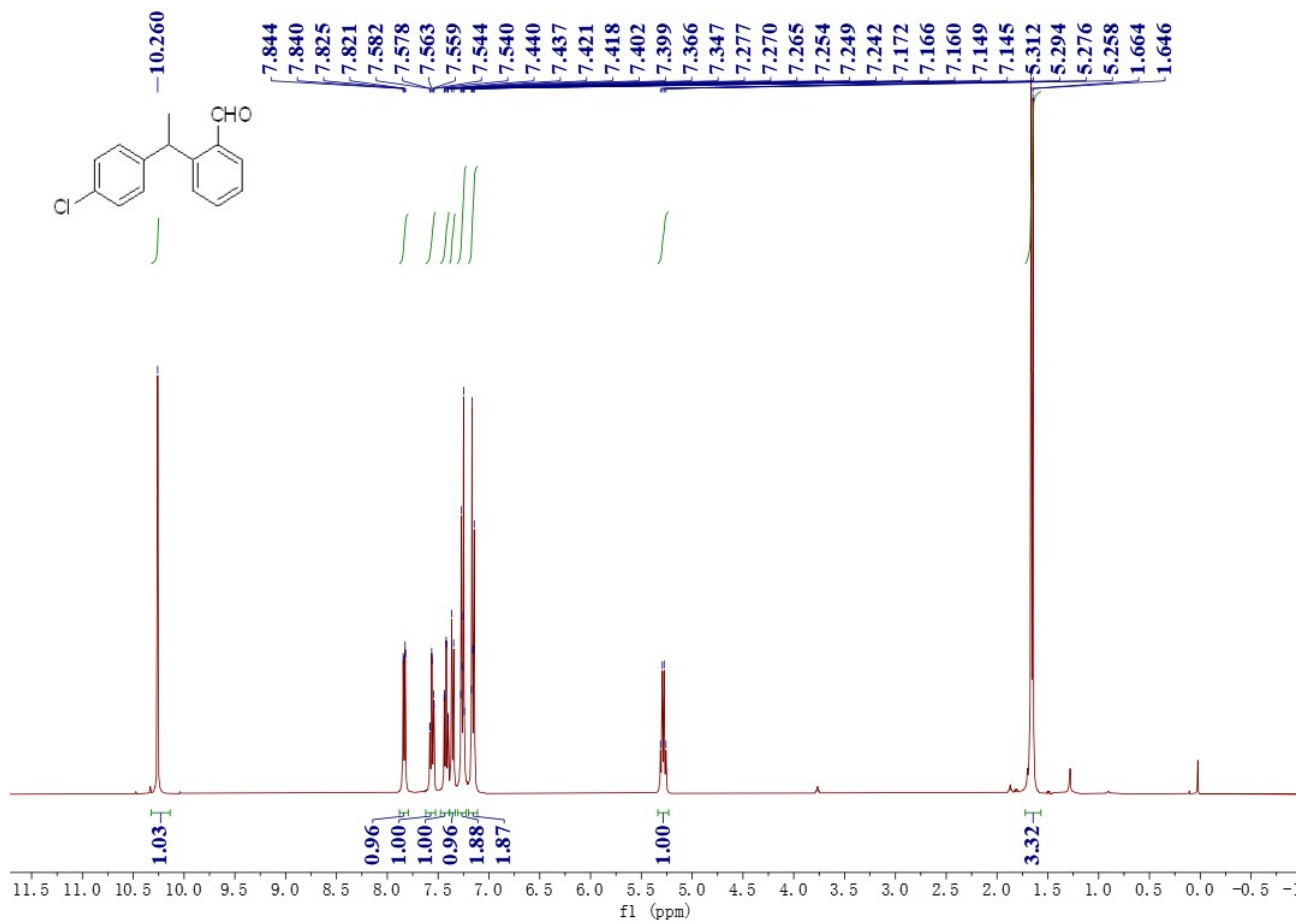

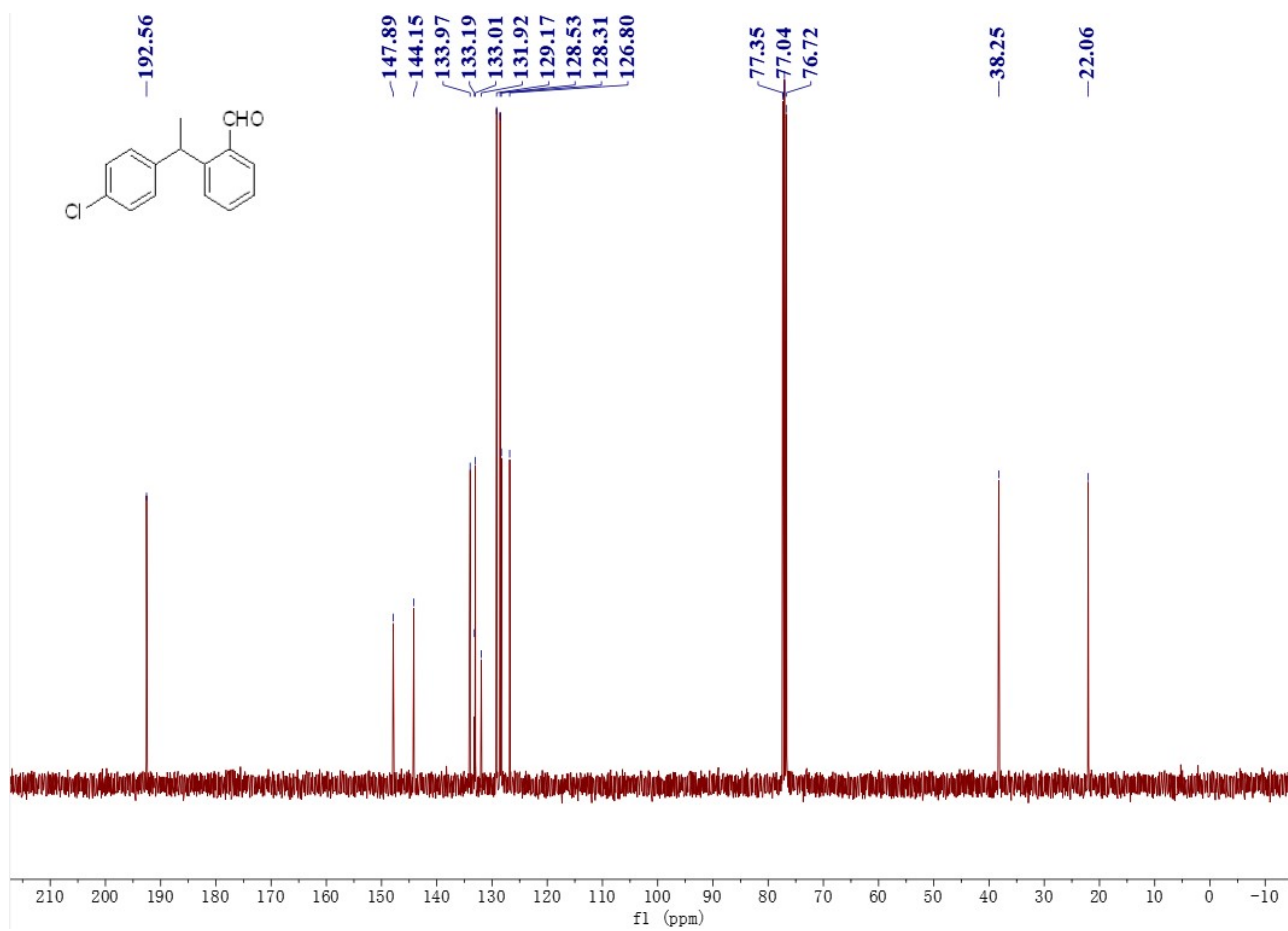

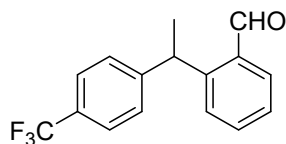

### 2-(1-(4-(trifluoromethyl)phenyl)ethyl)benzaldehyde (2d)

A colorless oil. 40.6 mg, 73% yield.  $^1\text{H}$  NMR ( $\text{CDCl}_3$ , TMS, 400 MHz)  $\delta$  10.14 (s, 1H), 7.74 (dd,  $J = 7.6, 1.6$  Hz, 1H), 7.51-7.44 (m, 3H), 7.36 (td,  $J = 7.6, 1.2$  Hz, 1H), 7.28 (dd,  $J = 7.8, 1.2$  Hz, 1H), 7.24 (d,  $J = 8.0$  Hz, 2H), 5.30 (q,  $J = 7.2$  Hz, 1H), 1.60 (d,  $J = 7.2$  Hz, 3H).  $^{13}\text{C}$  NMR ( $\text{CDCl}_3$ , TMS, 100 MHz)  $\delta$  192.7, 149.8, 147.3, 134.0, 133.6, 133.3, 128.5 (d,  $J = 32.2$  Hz), 128.4, 128.2, 127.0, 125.3 (d,  $J = 4.0$  Hz), 124.2 (q,  $J = 273.6$  Hz), 38.7, 21.9.  $^{19}\text{F}$  NMR (376 MHz,  $\text{CDCl}_3$ )  $\delta$  -62.4. IR (acetone)  $\nu$  3076, 2870, 2735, 1689, 1571, 1452, 1293, 1186, 864, 695. Calcd. for  $\text{C}_{16}\text{H}_{13}\text{OF}_3$  ( $\text{M}^+$ ): 278.0913, Found: 278.0908.

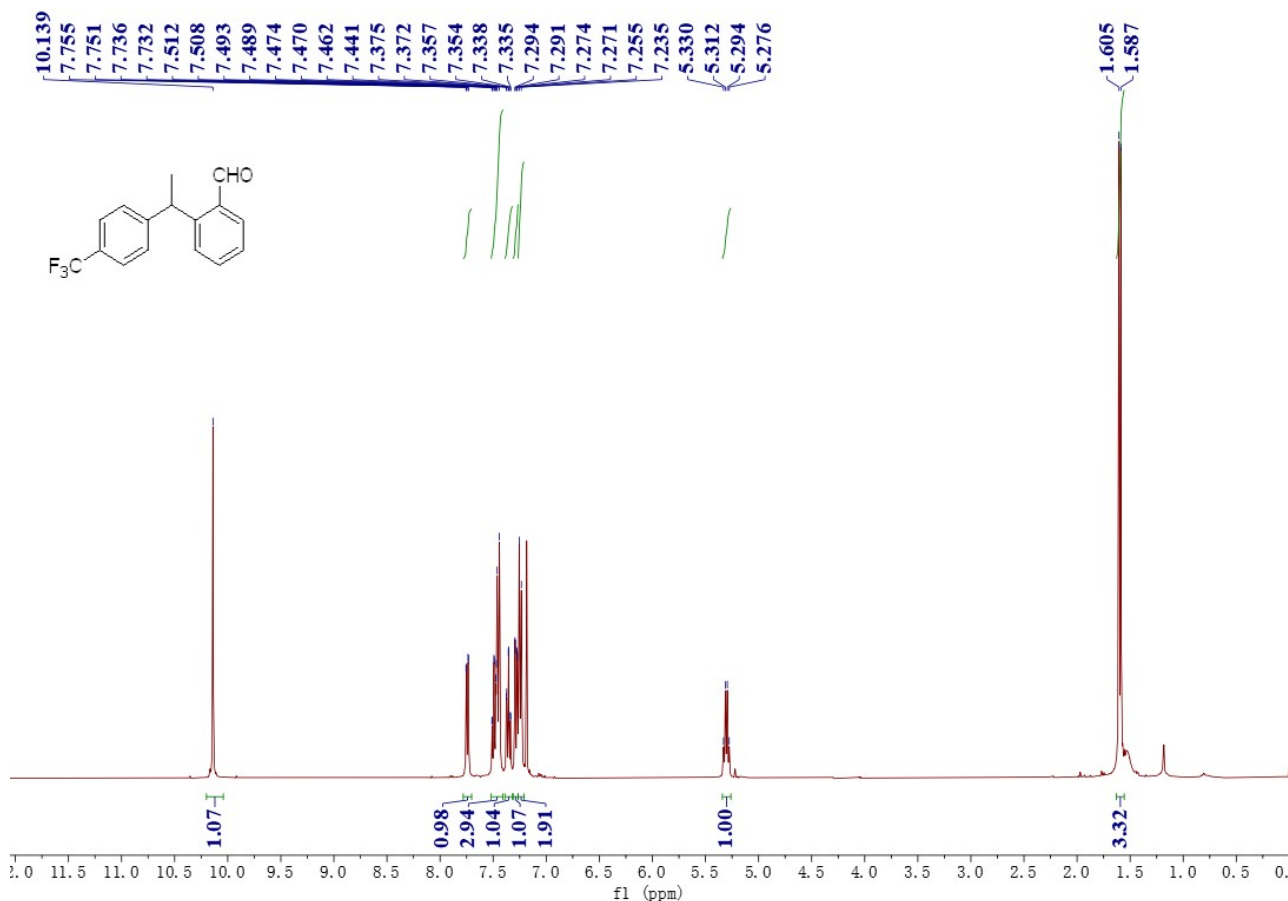

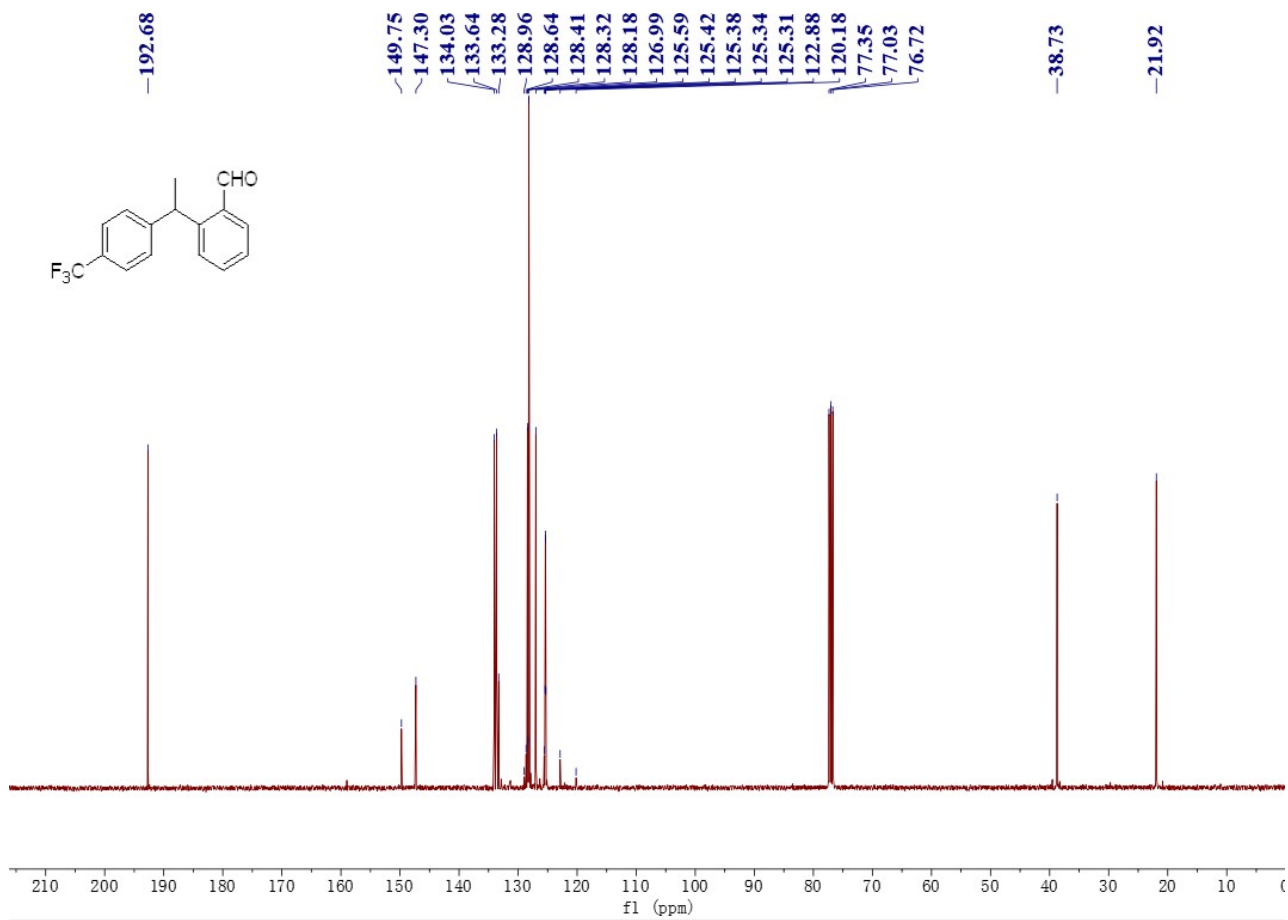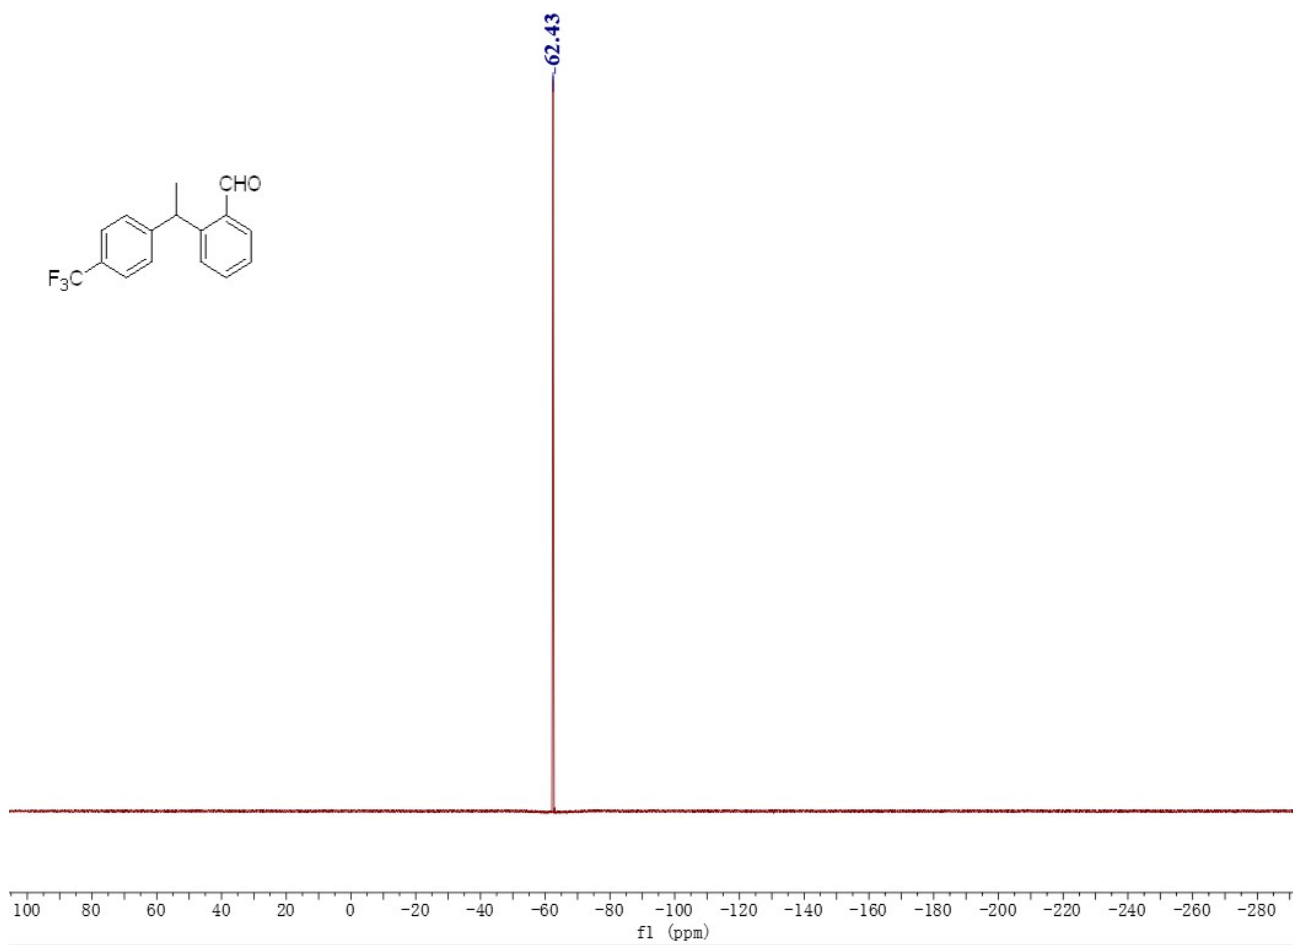

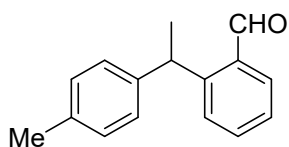

### 2-(1-(p-tolyl)ethyl)benzaldehyde (2e)

A colorless oil. 40.8 mg, 91% yield.  $^1\text{H}$  NMR ( $\text{CDCl}_3$ , TMS, 400 MHz)  $\delta$  10.31 (s, 1H), 7.83-7.80 (m, 1H), 7.52 (td,  $J = 7.6, 1.6$  Hz, 1H), 7.37-7.34 (m, 2H), 7.09 (s, 4H), 5.18 (q,  $J = 7.2$  Hz, 1H), 2.30 (s, 3H), 1.65 (d,  $J = 7.2$  Hz, 3H).  $^{13}\text{C}$  NMR ( $\text{CDCl}_3$ , TMS, 100 MHz)  $\delta$  192.4, 148.8, 142.7, 135.7, 133.9, 133.3, 131.7, 129.2, 128.3, 127.6, 126.5, 38.5, 22.3, 21.0. IR (acetone)  $\nu$  2967, 2873, 1692, 1598, 1511, 1486, 1246, 1031, 825, 748  $\text{cm}^{-1}$ . Calcd. for  $\text{C}_{16}\text{H}_{16}\text{O}$  ( $\text{M}^+$ ): 224.1196, Found: 224.1207.

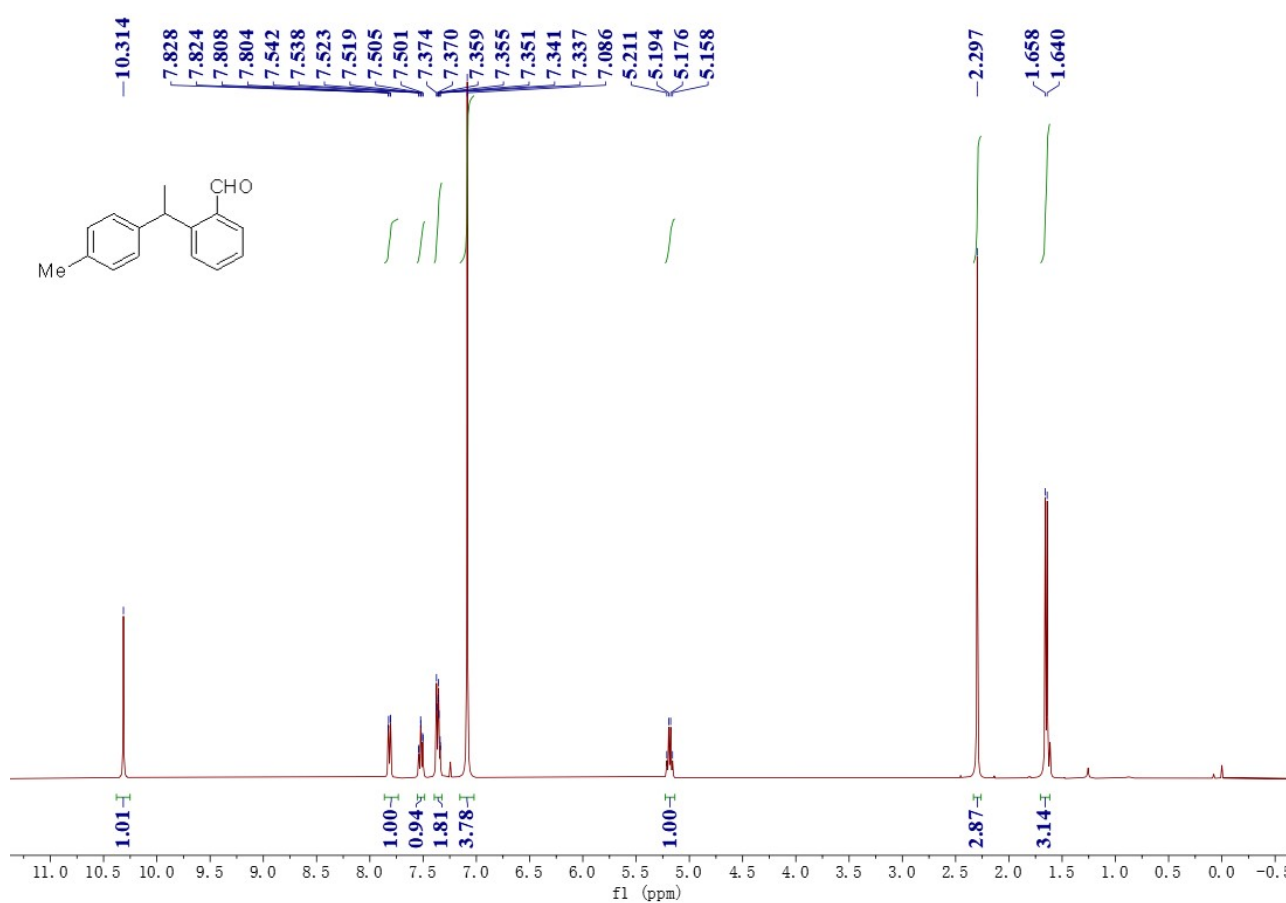



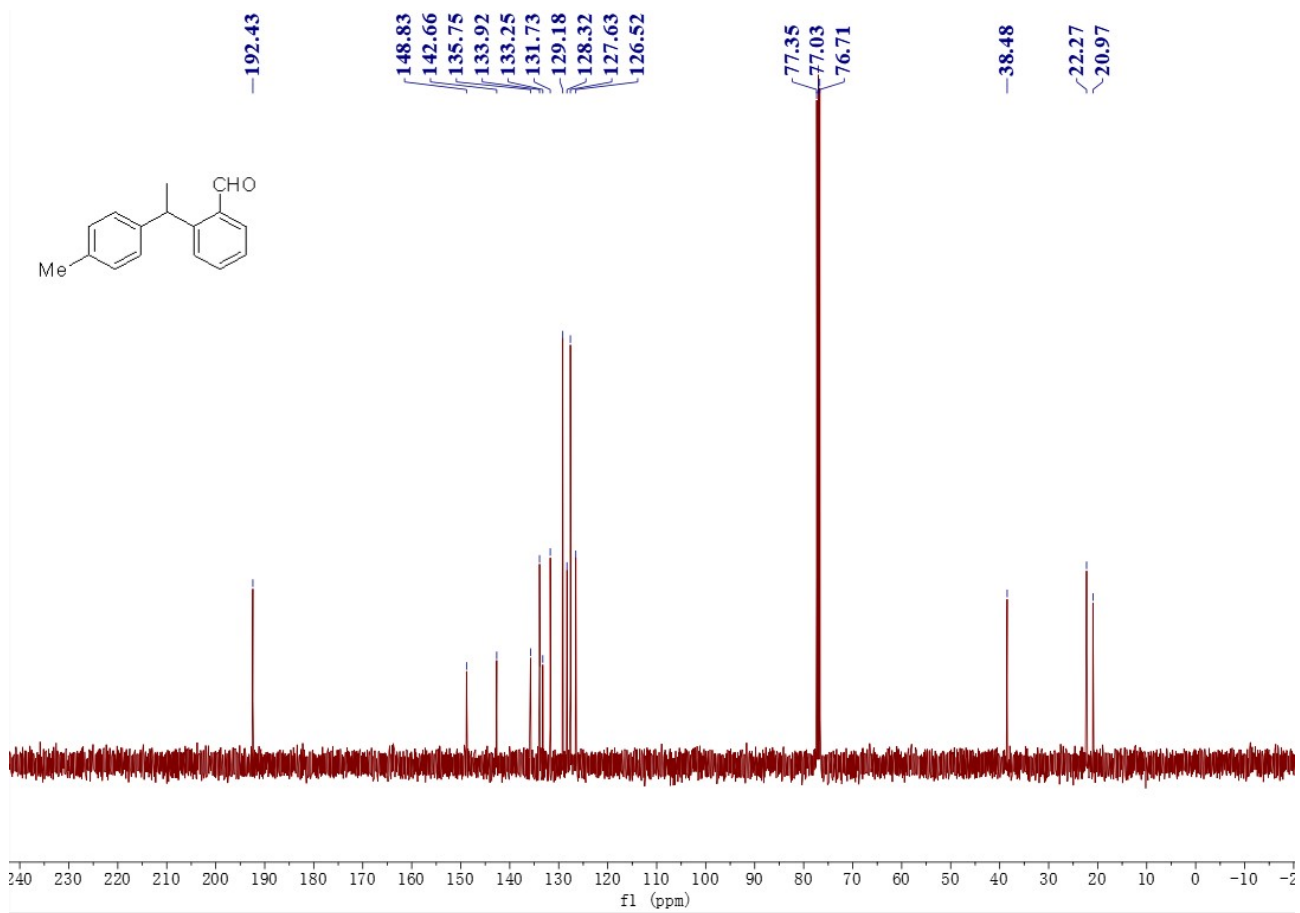

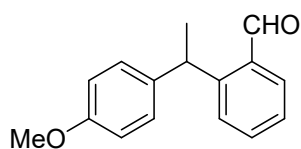

### 2-(1-(4-methoxyphenyl)ethyl)benzaldehyde (2f)

A colorless oil. 31.2 mg, 65% yield.  $^1\text{H}$  NMR ( $\text{CDCl}_3$ , TMS, 400 MHz)  $\delta$  10.34 (s, 1H), 7.84 (d,  $J = 7.6$  Hz, 1H), 7.55 (td,  $J = 7.6, 1.6$  Hz, 1H), 7.38 (t,  $J = 8.0$  Hz, 2H), 7.15-7.13 (m, 2H), 6.85-6.83 (m, 2H), 5.20 (q,  $J = 7.2$  Hz, 1H), 3.79 (s, 3H), 1.66 (d,  $J = 7.2$  Hz, 3H).  $^{13}\text{C}$  NMR ( $\text{CDCl}_3$ , TMS, 100 MHz)  $\delta$  192.4, 157.9, 149.0, 137.8, 133.9, 133.2, 131.8, 128.7, 128.3, 126.5, 113.8, 55.2, 38.0, 22.3. IR (acetone)  $\nu$  2966, 2831, 1690, 1598, 1489, 1453, 1245, 1029, 831, 769  $\text{cm}^{-1}$ . HRMS (EI) calcd. for  $\text{C}_{16}\text{H}_{16}\text{O}_2$  ( $\text{M}^+$ ): 240.1145, Found: 240.1143.

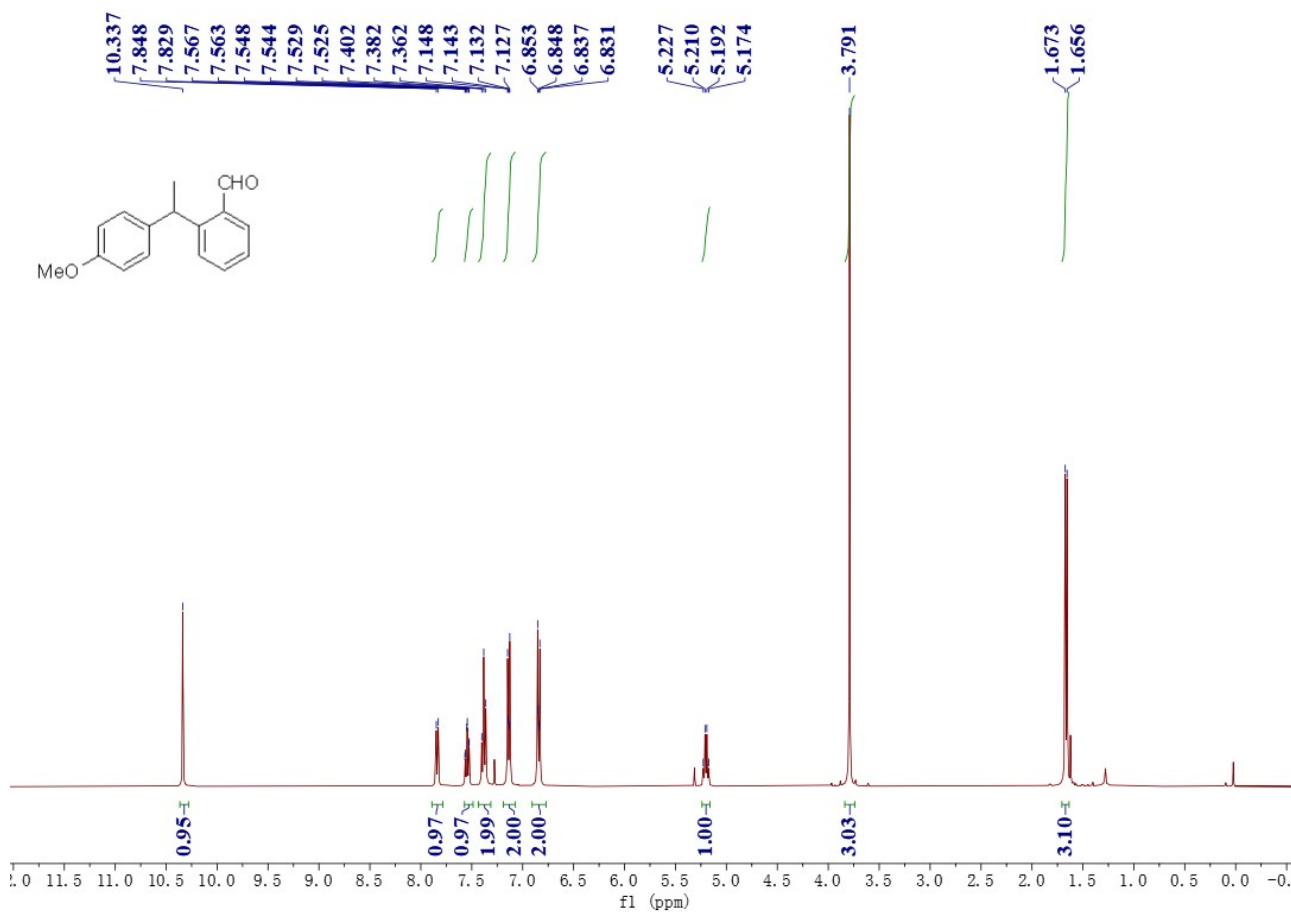

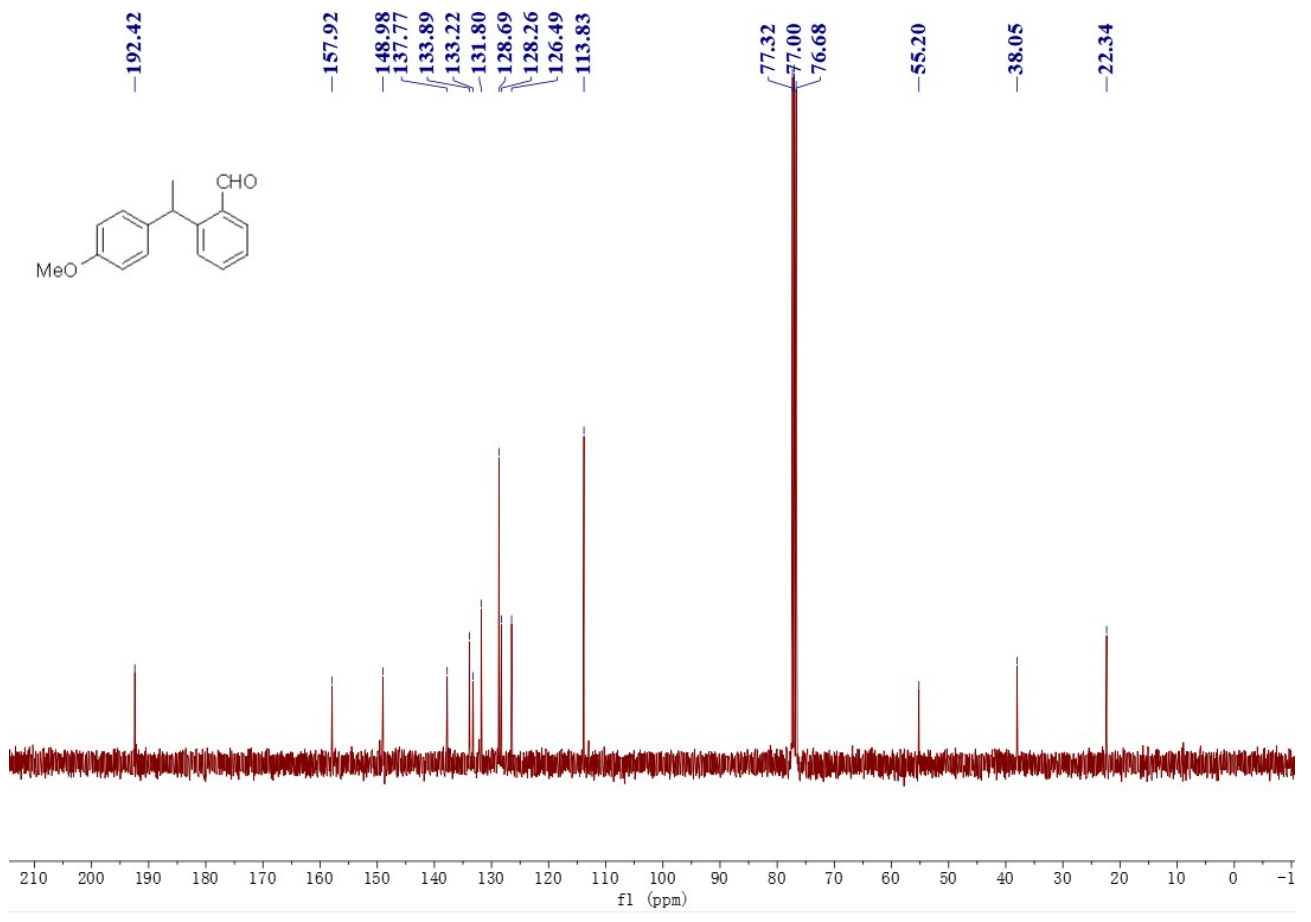

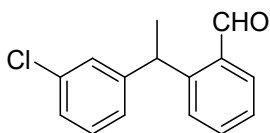

### 2-(1-(3-chlorophenyl)ethyl)benzaldehyde (2g)

A colorless oil. 44.1 mg, 90% yield.  $^1\text{H}$  NMR ( $\text{CDCl}_3$ , TMS, 400 MHz)  $\delta$  10.24 (s, 1H), 7.81 (dd,  $J = 7.6, 1.6$  Hz, 1H), 7.54 (td,  $J = 7.6, 1.6$  Hz, 1H), 7.40 (t,  $J = 7.6$  Hz, 1H), 7.34 (d,  $J = 7.8$  Hz, 1H), 7.22-7.08 (m, 4H), 5.28 (q,  $J = 7.2$  Hz, 1H), 1.63 (d,  $J = 7.2$  Hz, 3H).  $^{13}\text{C}$  NMR ( $\text{CDCl}_3$ , TMS, 100 MHz)  $\delta$  192.6, 147.7, 147.6, 134.3, 134.0, 133.2, 133.1, 129.7, 128.4, 127.9, 126.9, 126.4, 126.2, 38.5, 22.0. IR (acetone)  $\nu$  3076, 2970, 2735, 1690, 1596, 1474, 1409, 1080, 824, 695  $\text{cm}^{-1}$ . HRMS (EI) calcd. for  $\text{C}_{15}\text{H}_{13}\text{ClO}$  ( $\text{M}^+$ ): 244.0649, Found: 244.0648.

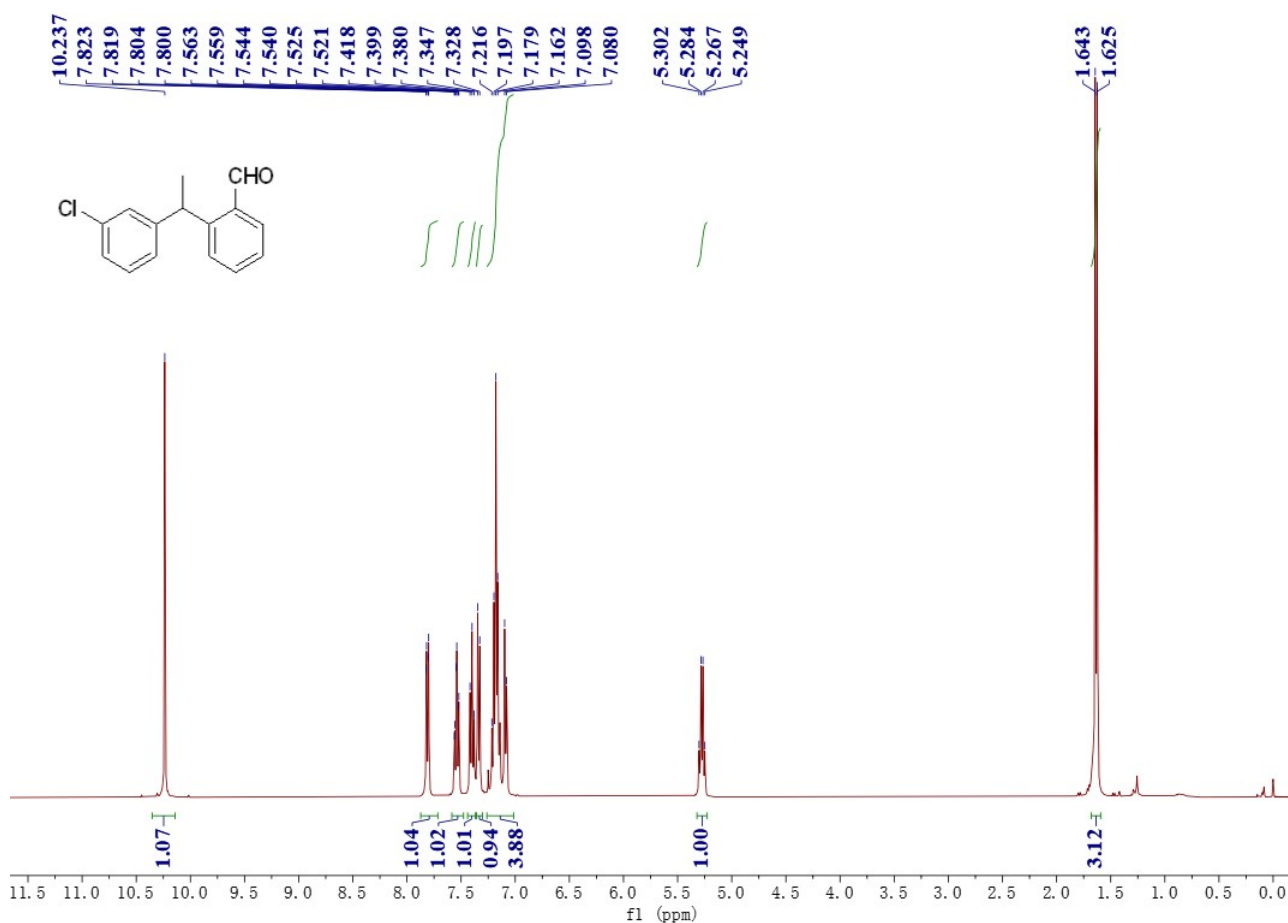

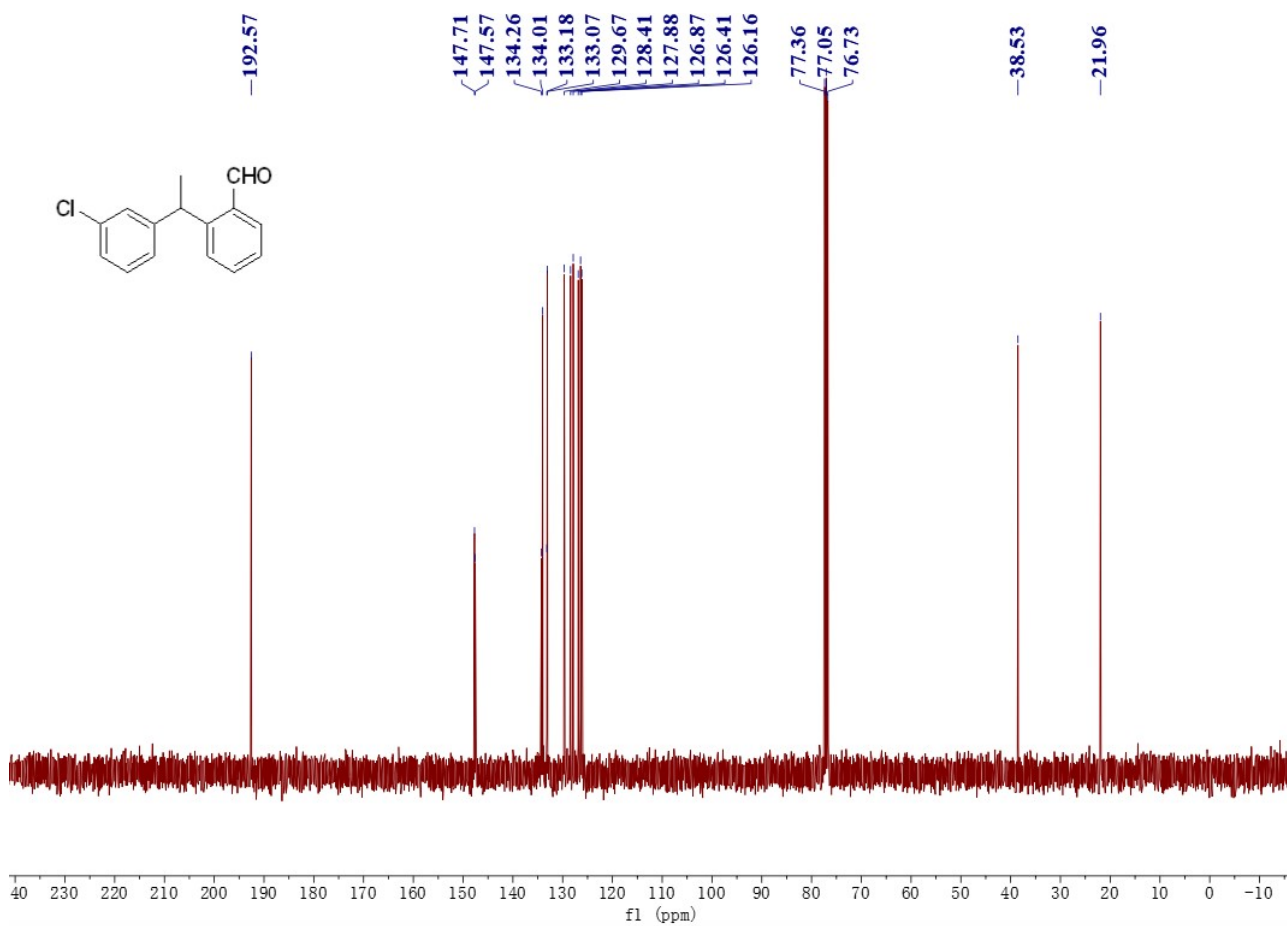

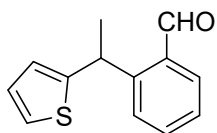

### 2-(1-(thiophen-2-yl)ethyl)benzaldehyde (2h)

A colorless oil. 35.9 mg, 83% yield.  $^1\text{H}$  NMR ( $\text{CDCl}_3$ , TMS, 400 MHz)  $\delta$  10.30 (s, 1H), 7.83 (dd,  $J = 7.6, 1.6$  Hz, 1H), 7.54 (td,  $J = 7.6, 1.6$  Hz, 1H), 7.41 (t,  $J = 8.0$  Hz, 2H), 7.17 (dd,  $J = 5.2, 1.2$  Hz, 1H), 6.93 (dd,  $J = 5.2, 3.6$  Hz, 1H), 6.83-6.82 (m, 1H), 5.50 (q,  $J = 7.2$  Hz, 1H), 1.74 (d,  $J = 7.2$  Hz, 3H).  $^{13}\text{C}$  NMR ( $\text{CDCl}_3$ , TMS, 100 MHz)  $\delta$  192.6, 149.7, 148.3, 134.1, 132.9, 132.6, 128.3, 126.9, 126.6, 124.2, 123.9, 34.6, 23.3. IR (acetone)  $\nu$  3061, 2969, 2865, 1691, 1598, 1485, 1450, 1023, 851, 697  $\text{cm}^{-1}$ . HRMS (EI) calcd. for  $\text{C}_{13}\text{H}_{12}\text{SO}$  ( $\text{M}^+$ ): 216.0603, Found: 216.0604.

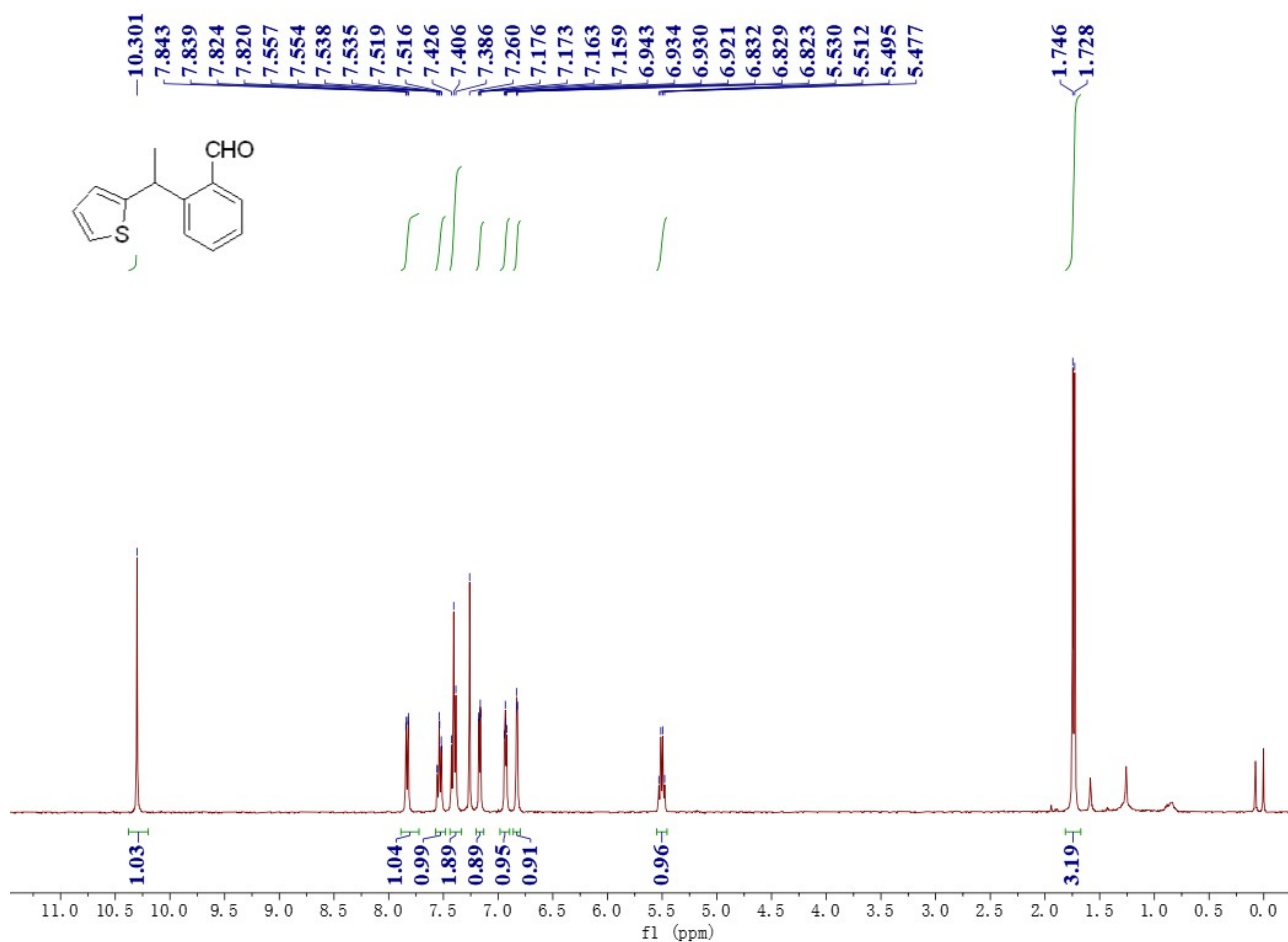

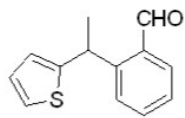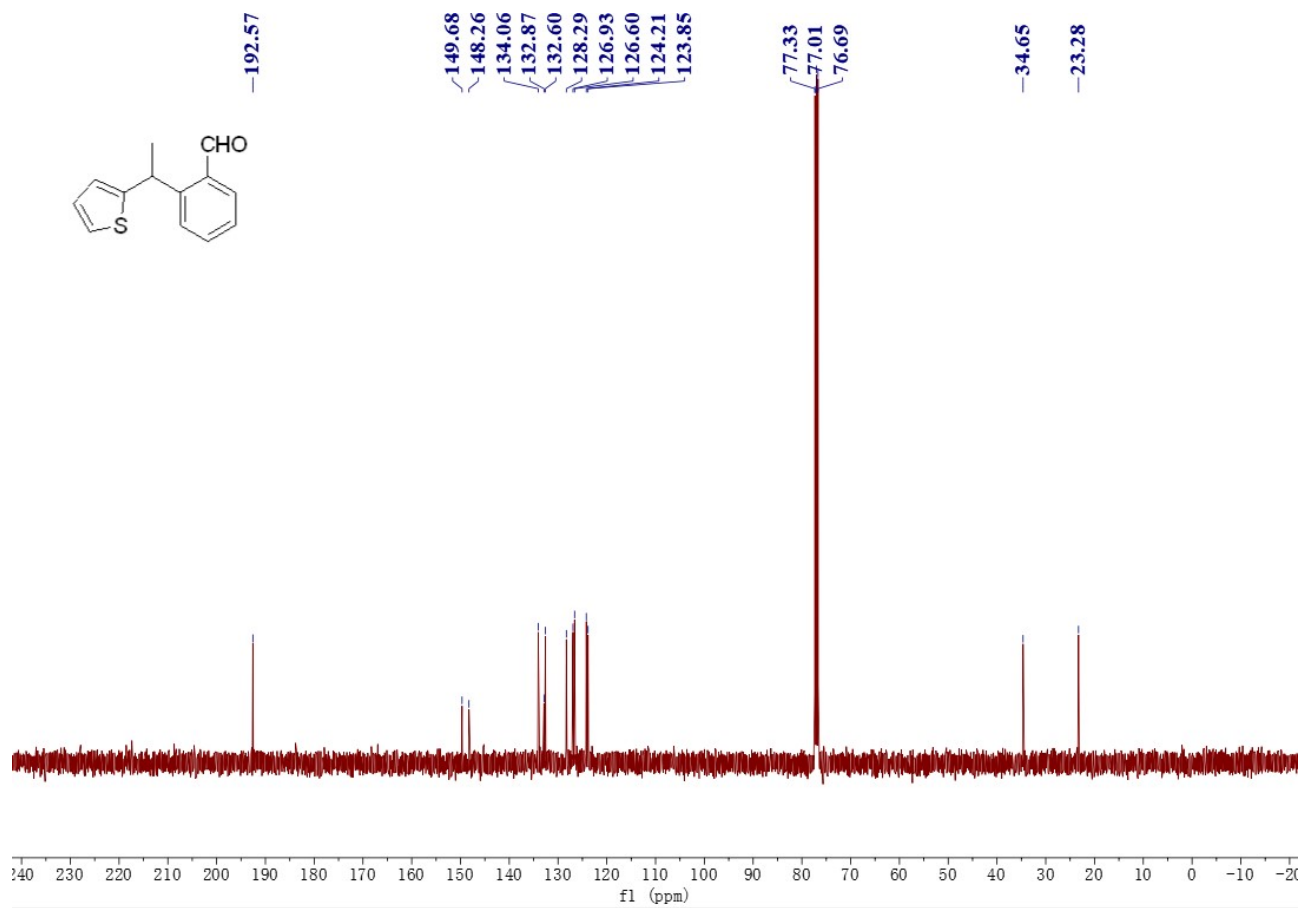

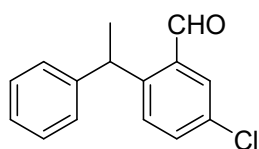

### 5-chloro-2-(1-phenylethyl)benzaldehyde (2i)

A colorless oil. 45.4 mg, 93% yield.  $^1\text{H}$  NMR ( $\text{CDCl}_3$ , TMS, 400 MHz)  $\delta$  10.25 (s, 1H), 7.78 (d,  $J = 2.4$  Hz, 1H), 7.47 (dd,  $J = 8.4, 2.5$  Hz, 1H), 7.30-7.24 (m, 3H), 7.20-7.14 (m, 3H), 5.12 (q,  $J = 7.2$  Hz, 1H), 1.64 (d,  $J = 7.2$  Hz, 3H).  $^{13}\text{C}$  NMR ( $\text{CDCl}_3$ , TMS, 100 MHz)  $\delta$  190.7, 146.9, 145.0, 134.5, 133.8, 132.9, 130.9, 130.1, 128.6, 127.6, 126.5, 38.6, 22.2. IR (acetone)  $\nu$  3061, 2971, 2863, 1688, 1594, 1479, 1451, 1027, 832, 699  $\text{cm}^{-1}$ . HRMS (EI) calcd. for  $\text{C}_{15}\text{H}_{13}\text{ClO}$  ( $\text{M}^+$ ): 244.0649, Found: 244.0656.

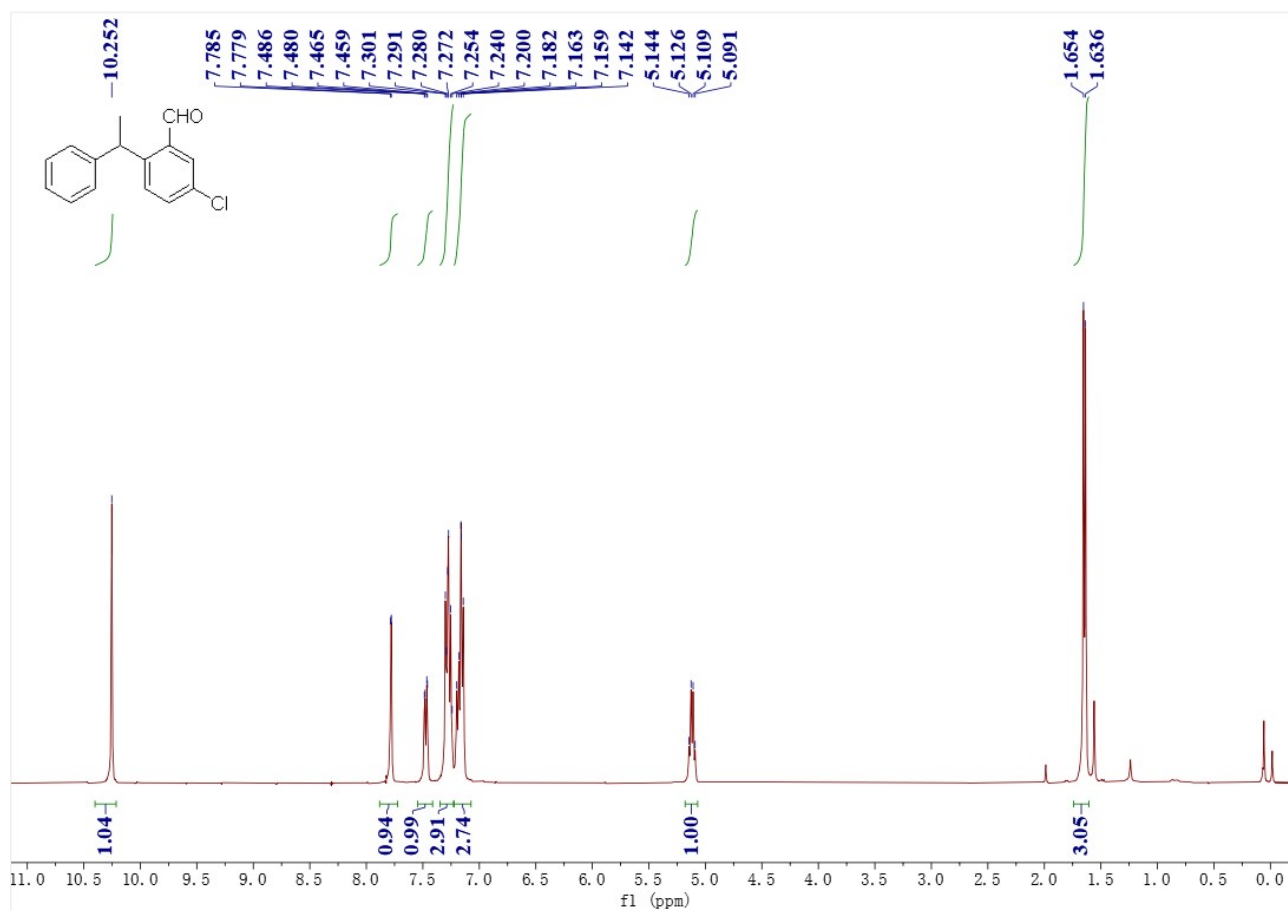



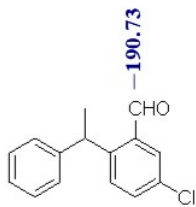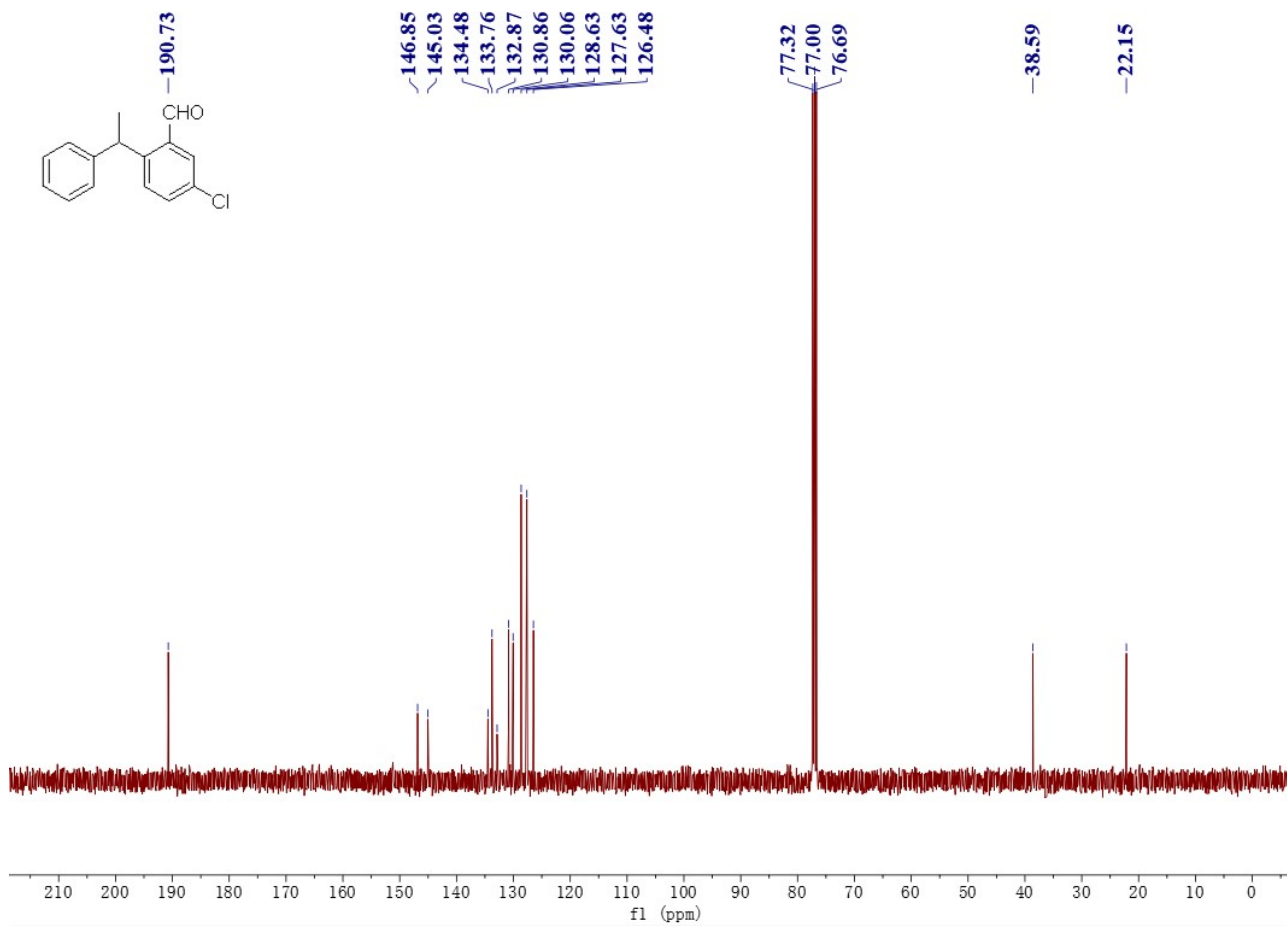

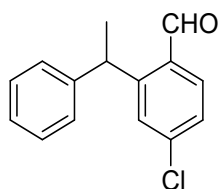

#### 4-chloro-2-(1-phenylethyl)benzaldehyde (2j)

A colorless oil. 44.4 mg, 91% yield.  $^1\text{H}$  NMR ( $\text{CDCl}_3$ , TMS, 400 MHz)  $\delta$  10.24 (s, 1H), 7.76 (d,  $J=8.8$  Hz, 1H), 7.35-7.17 (m, 7H), 5.19 (q,  $J=7.2$  Hz, 1H), 1.65 (d,  $J=7.2$  Hz, 3H).  $^{13}\text{C}$  NMR ( $\text{CDCl}_3$ , TMS, 100 MHz)  $\delta$  191.0, 150.3, 144.8, 140.5, 133.2, 131.7, 128.7, 128.6, 127.7, 127.0, 126.5, 38.8, 22.1. IR (acetone)  $\nu$  3060, 2970, 2873, 1687, 1587, 1479, 1450, 1027, 832, 698  $\text{cm}^{-1}$ . HRMS (EI) calcd. for  $\text{C}_{15}\text{H}_{13}\text{ClO}$  ( $\text{M}^+$ ): 244.0649, Found: 244.0669.

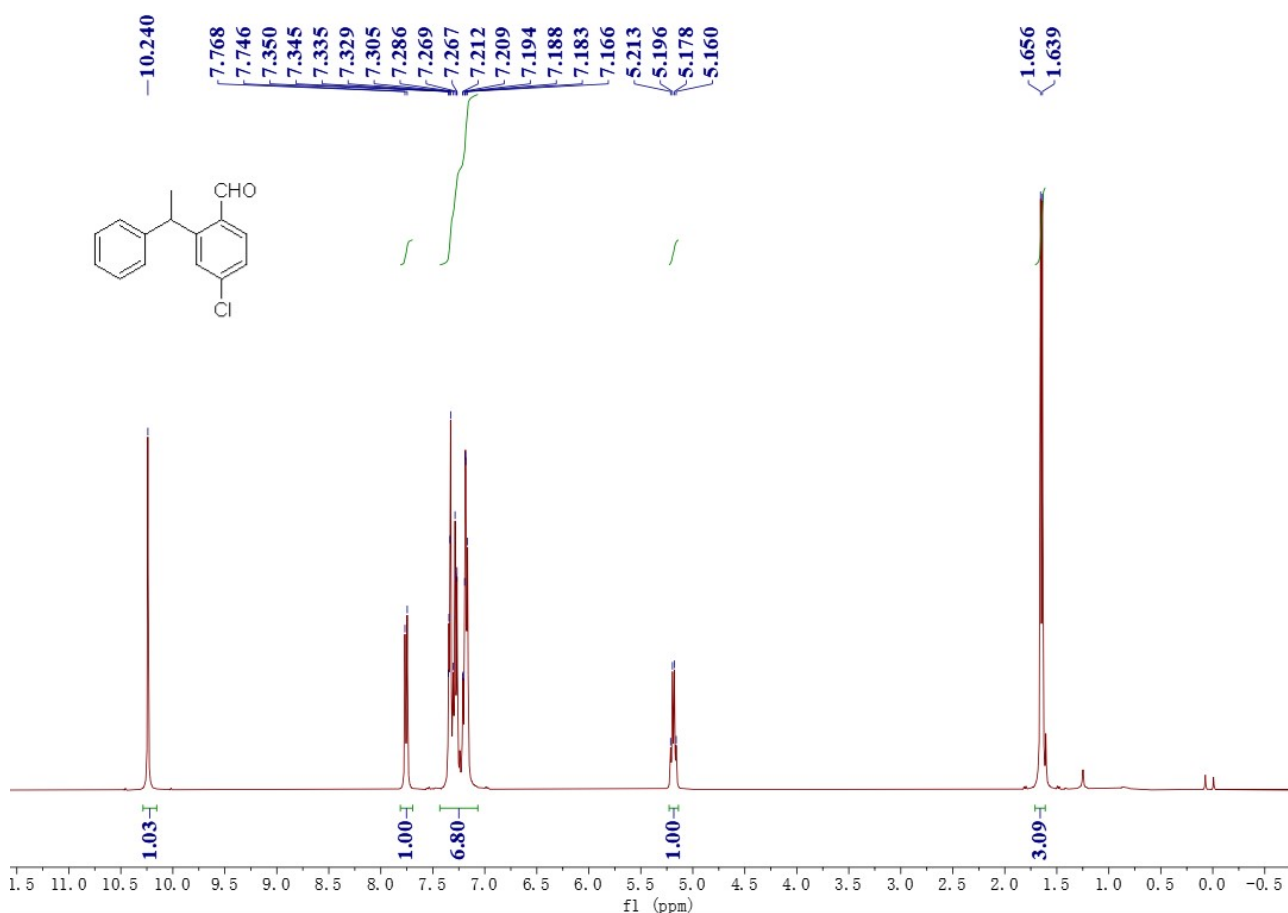

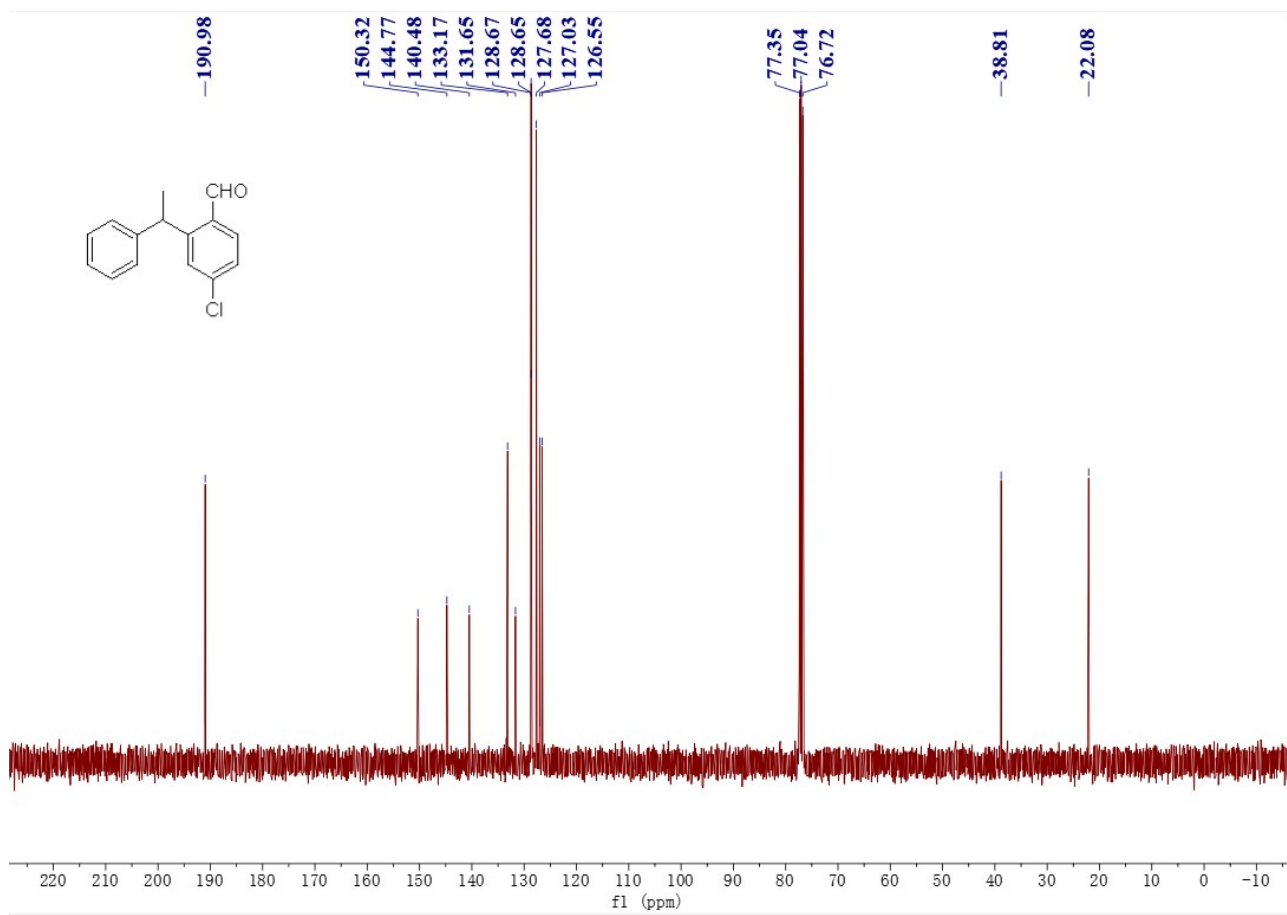

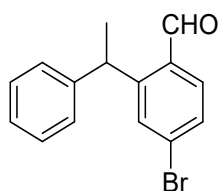

#### 4-bromo-2-(1-phenylethyl)benzaldehyde (2k)

A colorless oil. 53.6 mg, 93% yield.  $^1\text{H}$  NMR ( $\text{CDCl}_3$ , TMS, 400 MHz)  $\delta$  10.24 (s, 1H), 7.68 (d,  $J = 8.8$  Hz, 1H), 7.53-7.51 (m, 2H), 7.29 (t,  $J = 7.2$  Hz, 2H), 7.20-7.17 (m, 3H), 5.18 (q,  $J = 7.2$  Hz, 1H), 1.66 (d,  $J = 7.2$  Hz, 3H).  $^{13}\text{C}$  NMR ( $\text{CDCl}_3$ , TMS, 100 MHz)  $\delta$  191.2, 150.3, 144.8, 133.1, 132.0, 131.6, 130.1, 129.5, 128.7, 127.7, 126.6, 38.8, 22.1. IR (acetone)  $\nu$  3063, 2970, 2870, 1689, 1583, 1473, 1450, 1028, 854, 699  $\text{cm}^{-1}$ . HRMS (EI) calcd. for  $\text{C}_{15}\text{H}_{13}\text{BrO}$  ( $\text{M}^+$ ): 288.0144, Found: 288.0148.

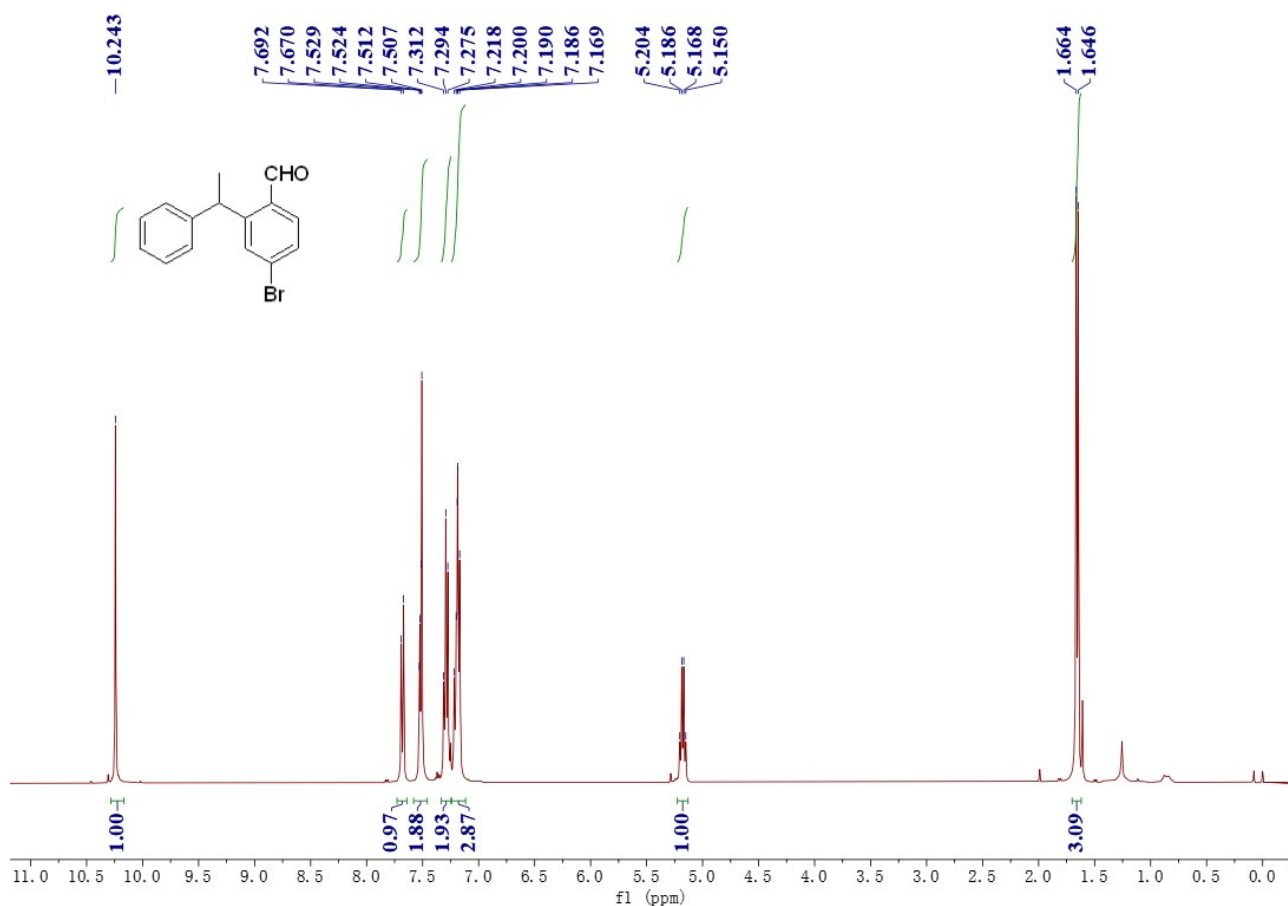

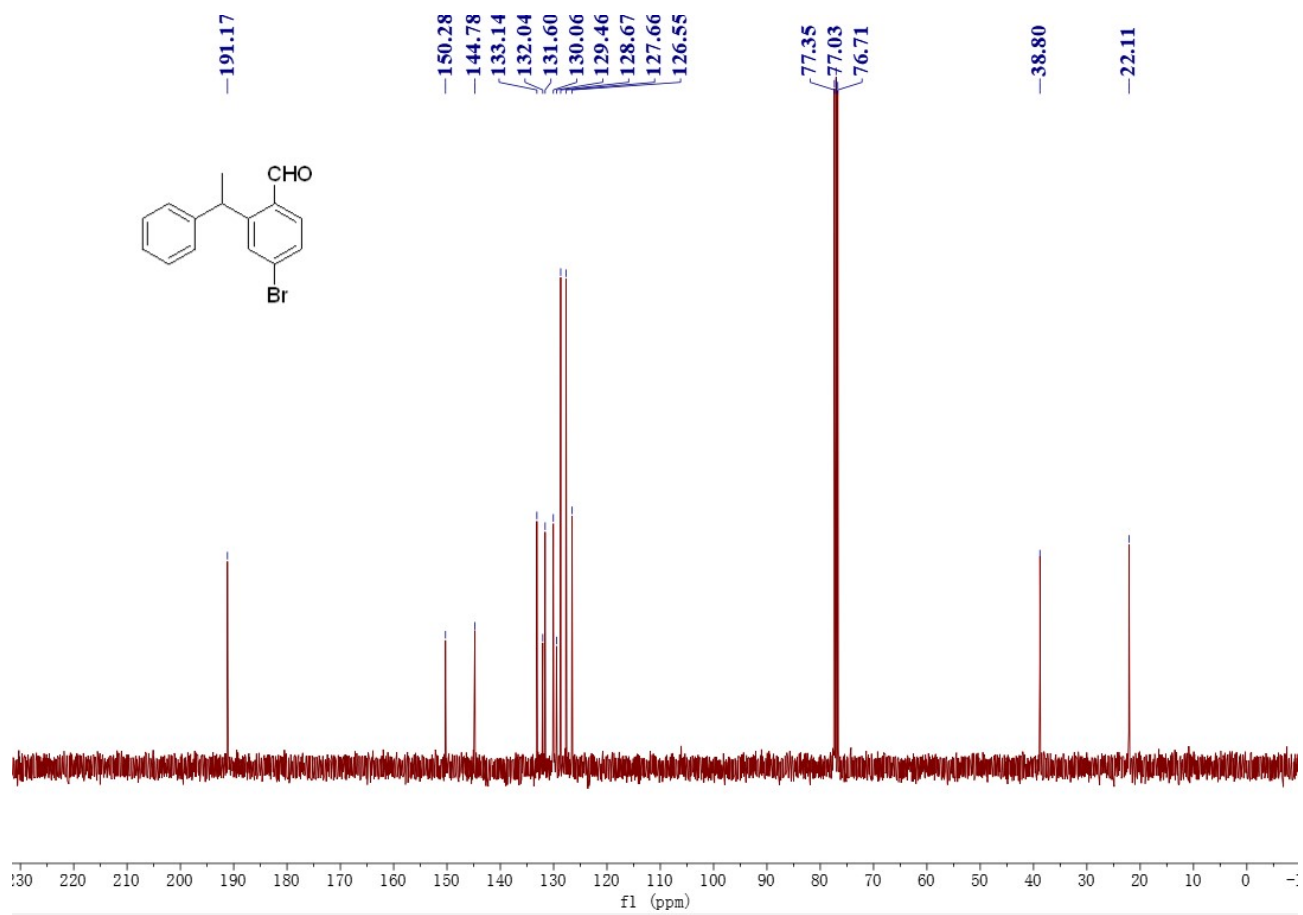

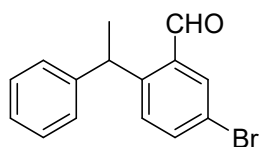

### 5-bromo-2-(1-phenylethyl)benzaldehyde (2I)

A colorless oil. 34.6 mg, 60% yield.  $^1\text{H}$  NMR ( $\text{CDCl}_3$ , TMS, 400 MHz)  $\delta$  10.25 (s, 1H), 7.94 (d,  $J = 2.2$  Hz, 1H), 7.63 (dd,  $J = 8.4, 2.2$  Hz, 1H), 7.30-7.16 (m, 6H), 5.12 (q,  $J = 7.2$  Hz, 1H), 1.66 (d,  $J = 7.2$  Hz, 3H).  $^{13}\text{C}$  NMR ( $\text{CDCl}_3$ , TMS, 100 MHz)  $\delta$  190.6, 147.4, 144.9, 136.7, 134.8, 133.9, 130.3, 128.6, 127.6, 126.5, 120.7, 38.7, 22.1. IR (acetone)  $\nu$  3060, 2970, 2873, 1689, 1587, 1479, 1450, 1027, 877, 697  $\text{cm}^{-1}$ . HRMS (EI) calcd. for  $\text{C}_{15}\text{H}_{13}\text{BrO}$  ( $\text{M}^+$ ): 288.0144, Found: 288.0146.

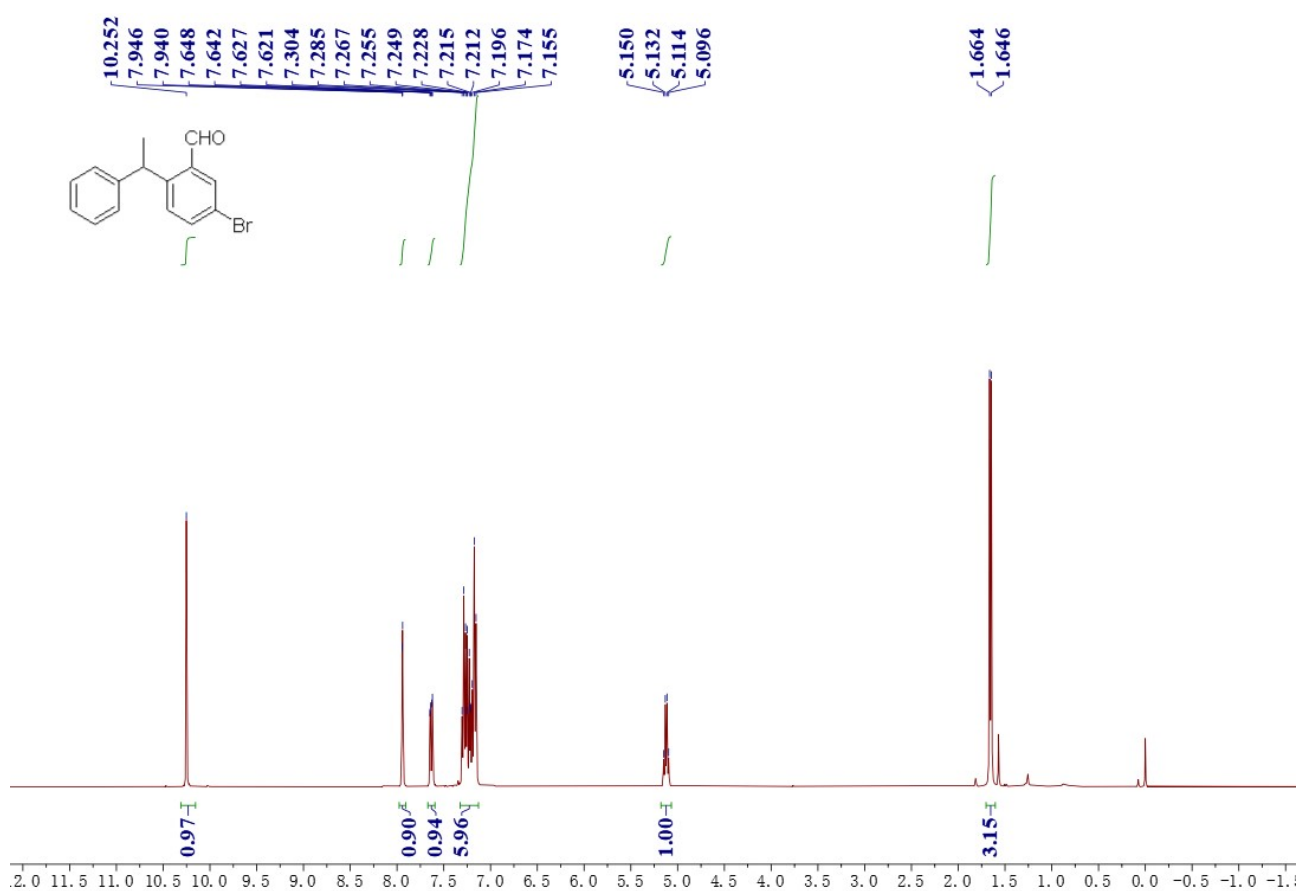

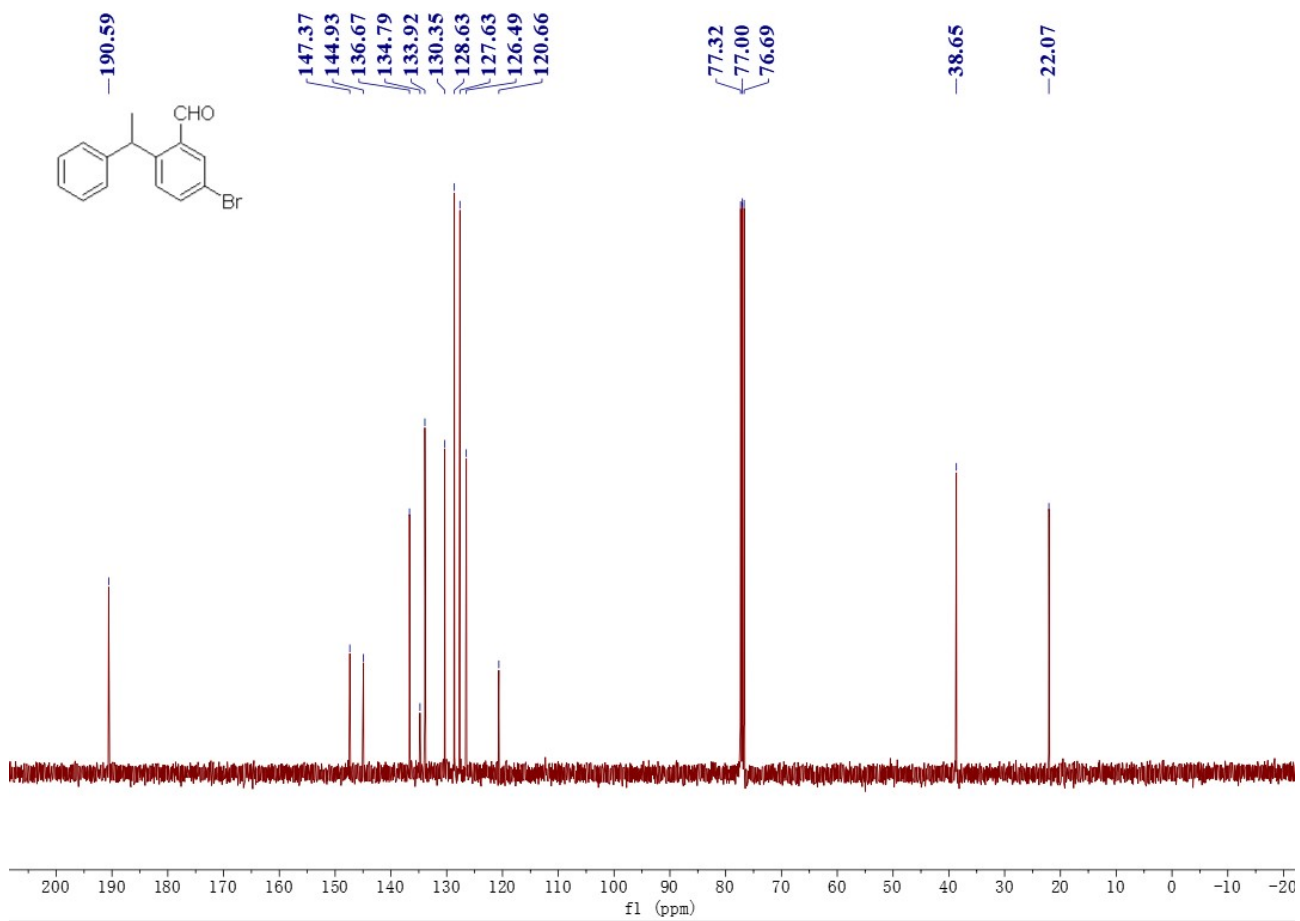

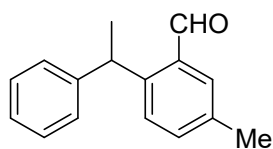

### 5-methyl-2-(1-phenylethyl)benzaldehyde (2m)

This is a known compound and its spectroscopic data are consistent with those in the previous literature.<sup>12</sup> CAS number: 1979200-43-5. A colorless oil. 25.6 mg, 57% yield. <sup>1</sup>H NMR (CDCl<sub>3</sub>, TMS, 400 MHz) δ 10.28 (s, 1H), 7.63 (d, *J* = 2.2 Hz, 1H), 7.34 (dd, *J* = 8.0, 2.2 Hz, 1H), 7.29-7.24 (m, 3H), 7.20-7.15 (m, 3H), 5.17 (q, *J* = 7.2 Hz, 1H), 2.38 (s, 3H), 1.65 (d, *J* = 7.2 Hz, 3H). <sup>13</sup>C NMR (CDCl<sub>3</sub>, TMS, 100 MHz) δ 192.6, 145.9, 145.7, 136.3, 134.7, 133.1, 132.2, 128.4, 128.4, 127.7, 126.1, 38.5, 22.2, 20.7.

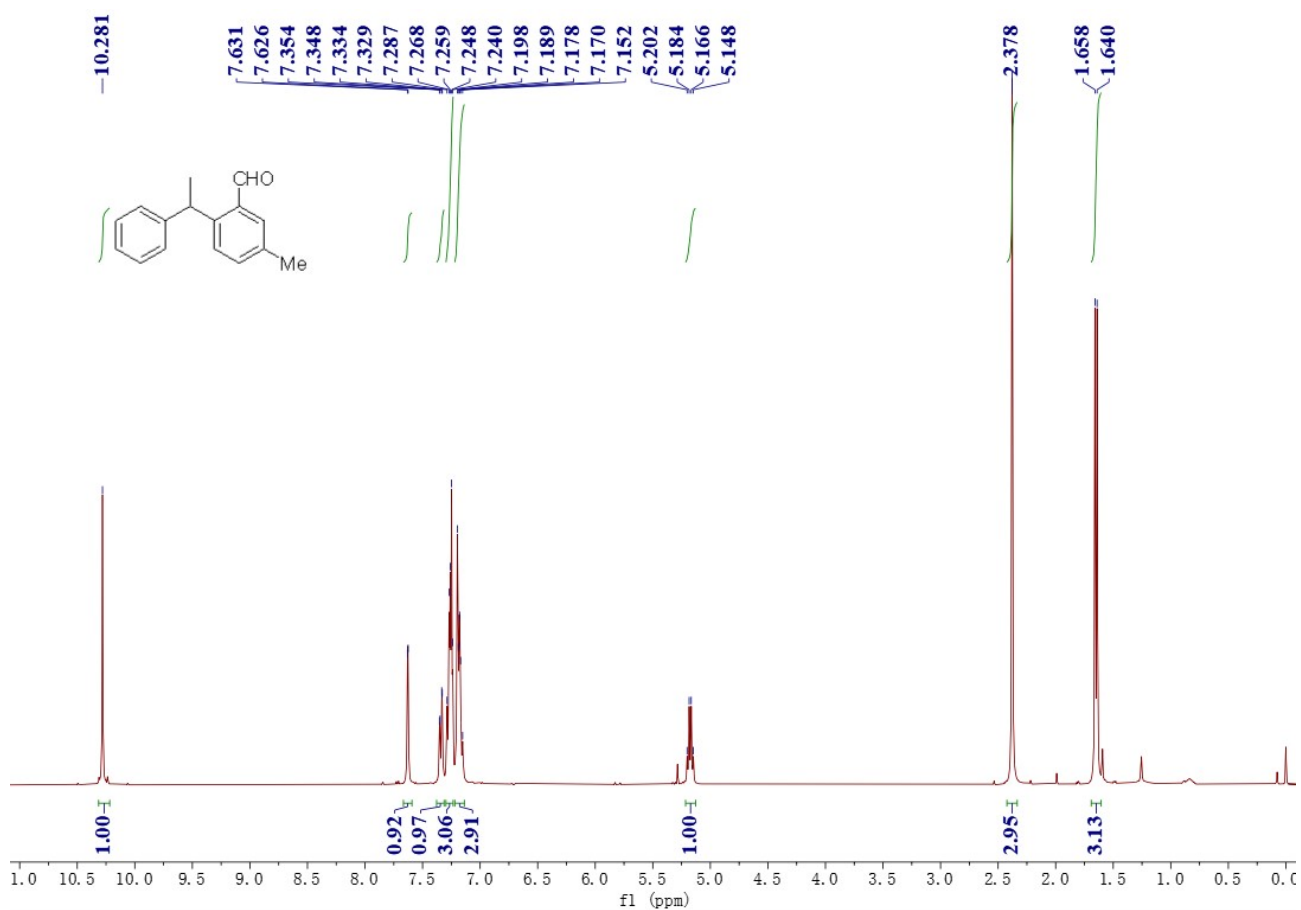



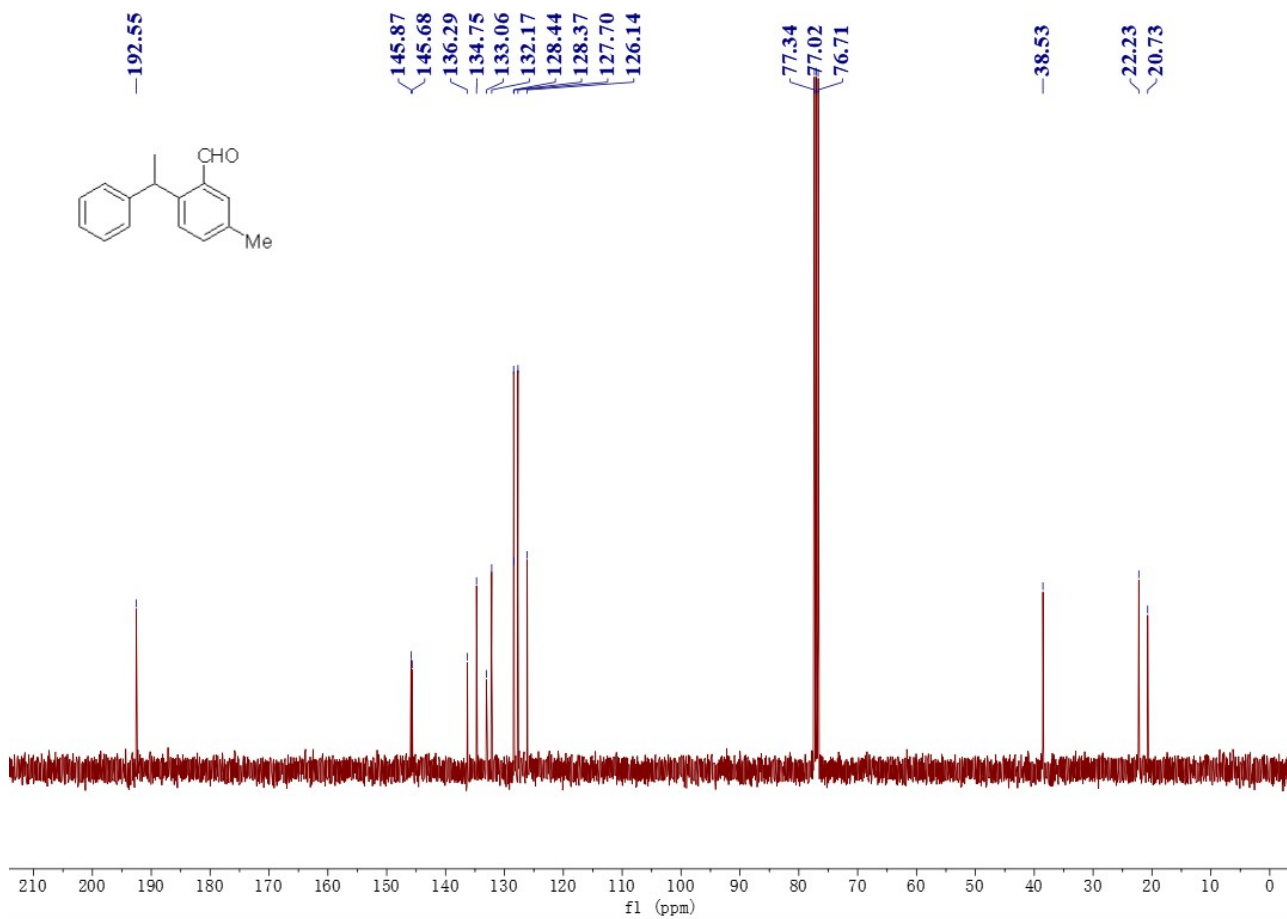

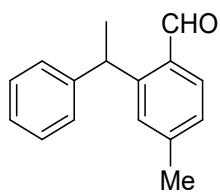

#### 4-(2-bromophenyl)-1-phenylbutan-1-one (2n)

A colorless oil. 40.4 mg, 90% yield.  $^1\text{H}$  NMR ( $\text{CDCl}_3$ , TMS, 400 MHz)  $\delta$  10.24 (s, 1H), 7.72 (d,  $J = 7.8$  Hz, 1H), 7.30-7.25 (m, 2H), 7.22-7.15 (m, 5H), 5.23 (q,  $J = 7.2$  Hz, 1H), 2.38 (s, 3H), 1.65 (d,  $J = 7.2$  Hz, 3H).  $^{13}\text{C}$  NMR ( $\text{CDCl}_3$ , TMS, 100 MHz)  $\delta$  192.1, 148.6, 145.7, 144.9, 132.4, 131.0, 129.1, 128.4, 127.8, 127.4, 126.1, 38.7, 22.1, 22.0. IR (acetone)  $\nu$  3055, 2970, 2877, 1692, 1627, 1494, 1451, 1179, 891, 698  $\text{cm}^{-1}$ . HRMS (EI) calcd. for  $\text{C}_{16}\text{H}_{16}\text{O}$  ( $\text{M}^+$ ): 224.1196, Found: 224.1198.

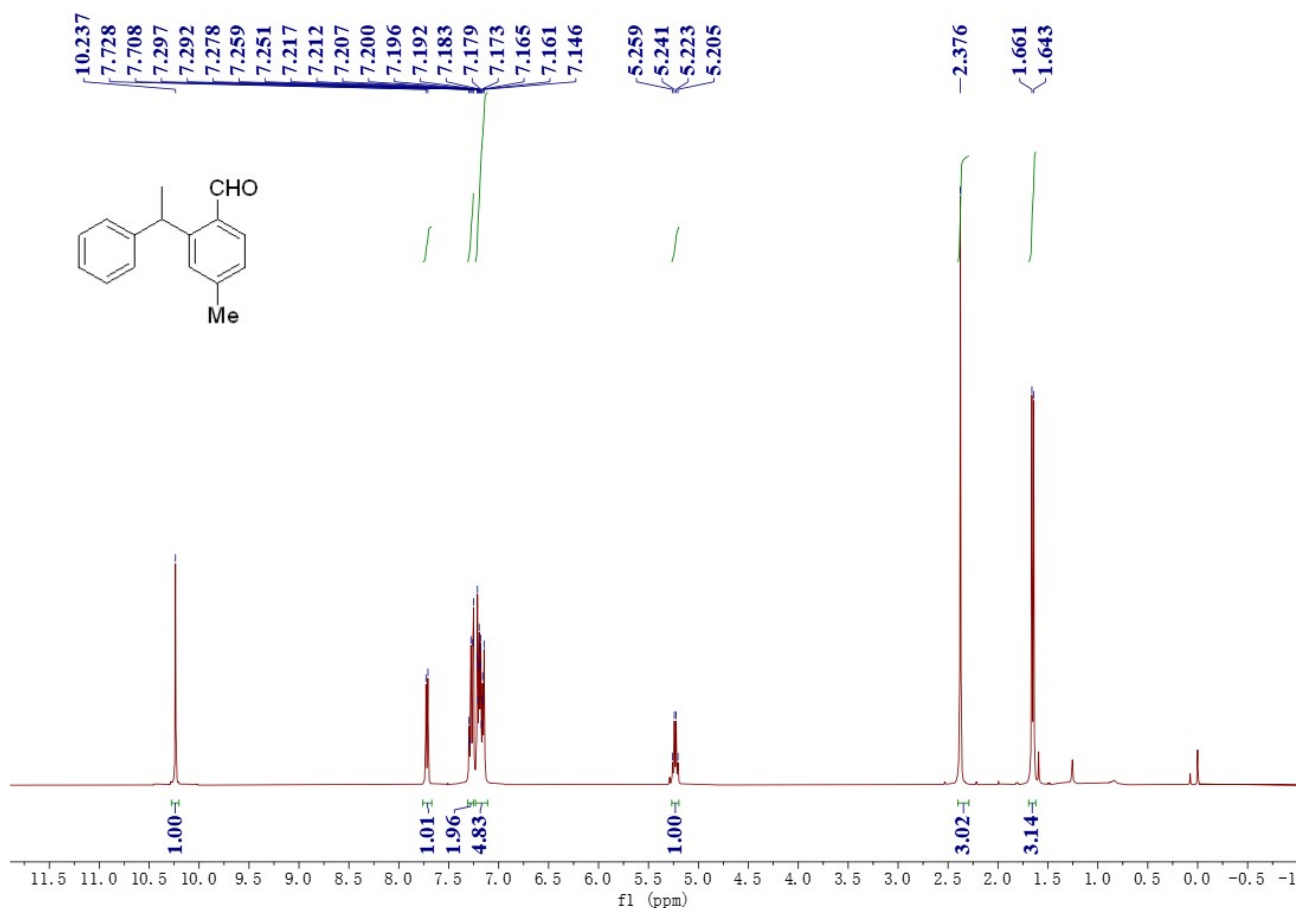

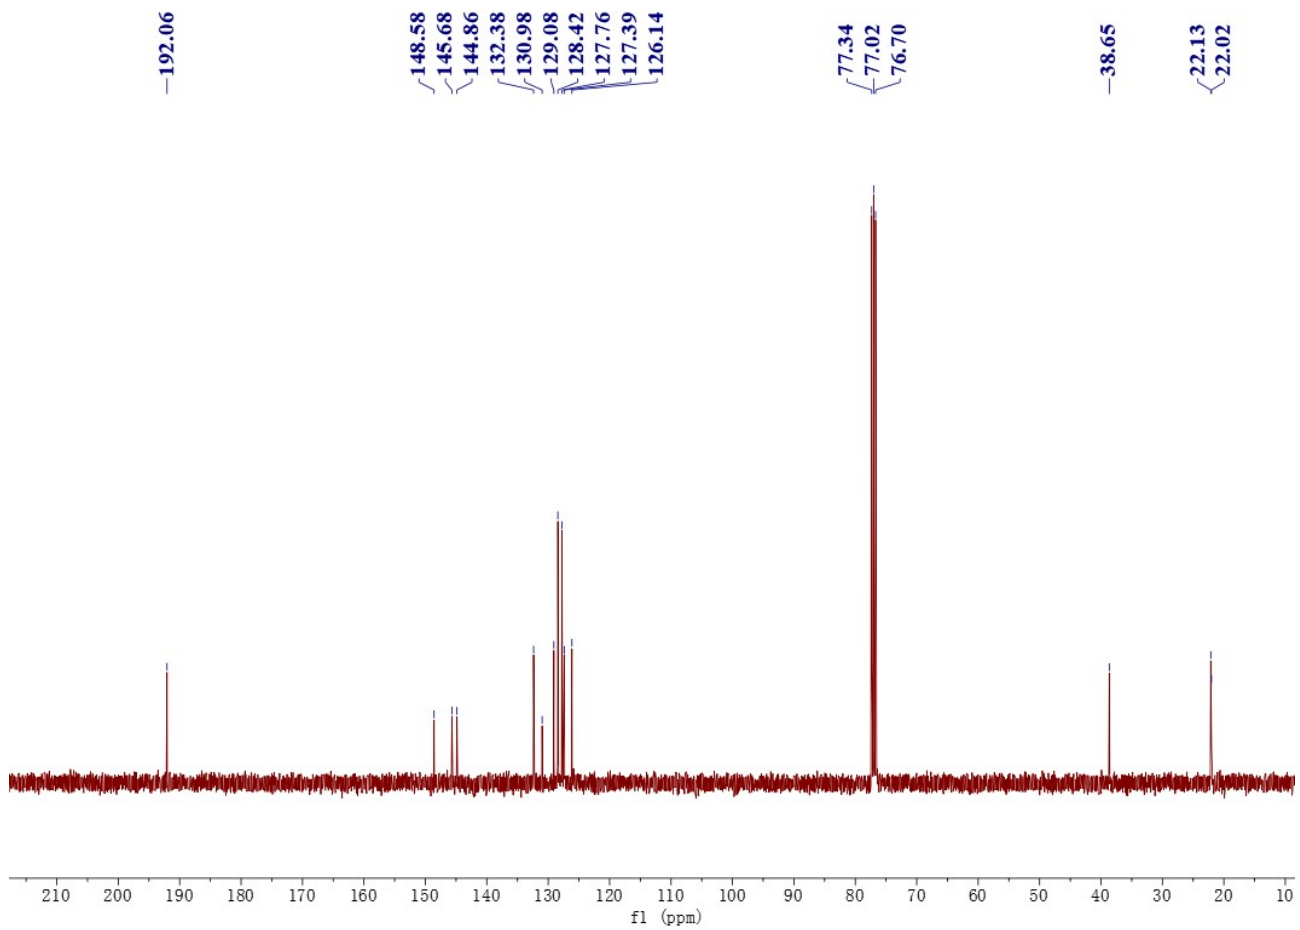

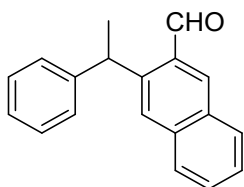

### 3-(1-phenylethyl)-2-naphthaldehyde (2o)

A white solid. 36.4 mg, 70% yield. M.P.: 72-74 °C.  $^1\text{H}$  NMR ( $\text{CDCl}_3$ , TMS, 400 MHz)  $\delta$  10.28 (s, 1H), 8.33 (s, 1H), 7.95 (d,  $J = 8.2$  Hz, 1H), 7.83 (d,  $J = 8.2$  Hz, 1H), 7.79 (s, 1H), 7.61 (d,  $J = 7.2$  Hz, 1H), 7.53 (t,  $J = 7.6$  Hz, 1H), 7.29-7.17 (m, 5H), 5.33 (q,  $J = 7.2$  Hz, 1H), 1.75 (d,  $J = 7.2$  Hz, 3H).  $^{13}\text{C}$  NMR ( $\text{CDCl}_3$ , TMS, 100 MHz)  $\delta$  192.6, 146.1, 143.0, 136.1, 135.7, 132.2, 131.2, 129.2, 129.1, 128.4, 127.9, 127.7, 127.2, 126.6, 126.1, 39.6, 22.5. IR (acetone)  $\nu$  3053, 2968, 2876, 1692, 1626, 1493, 1450, 1174, 894, 700  $\text{cm}^{-1}$ . HRMS (ESI) calcd. for  $\text{C}_{19}\text{H}_{16}\text{ONa}$  ( $\text{M}+\text{Na}$ ) $^+$ : 283.1093, Found: 283.1088.

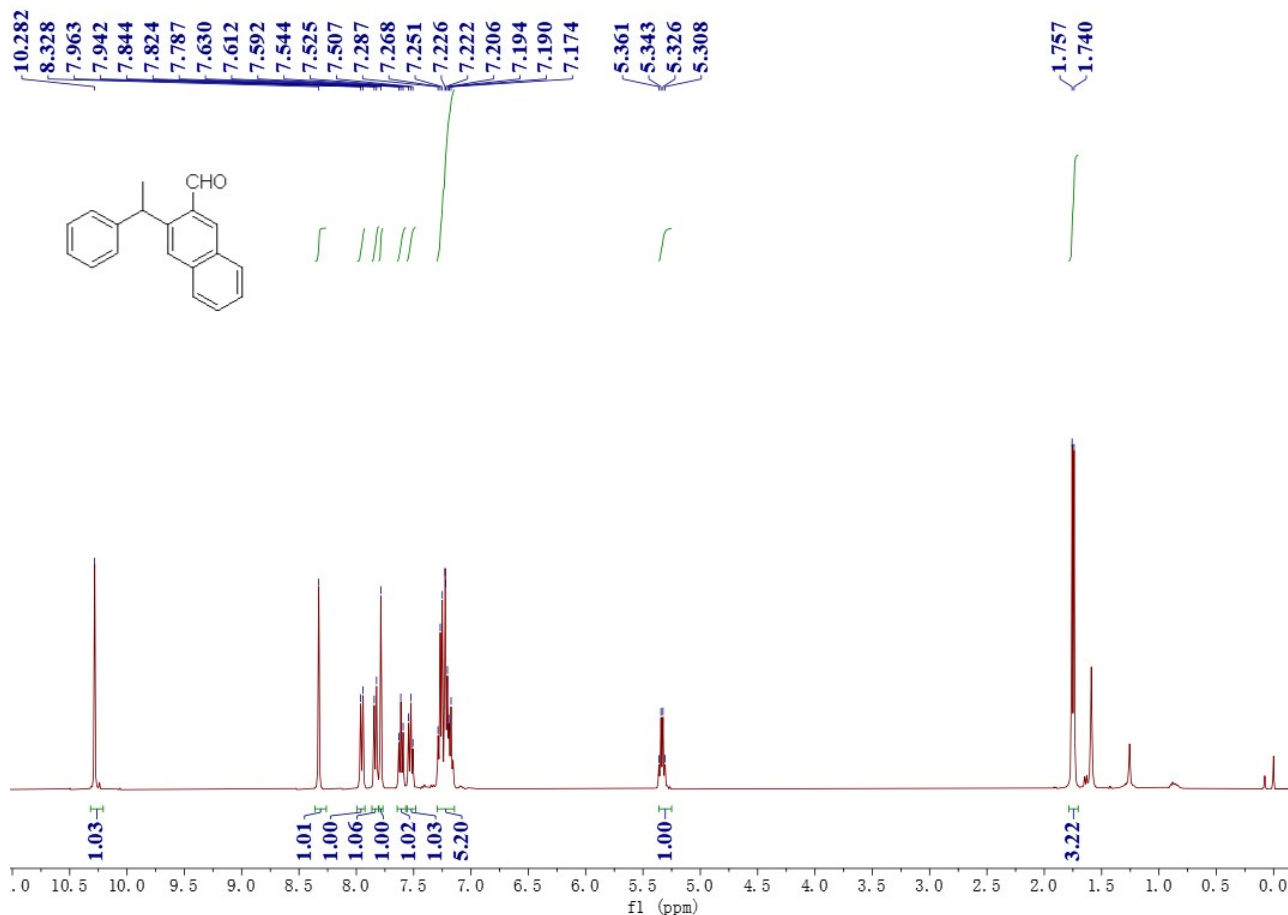

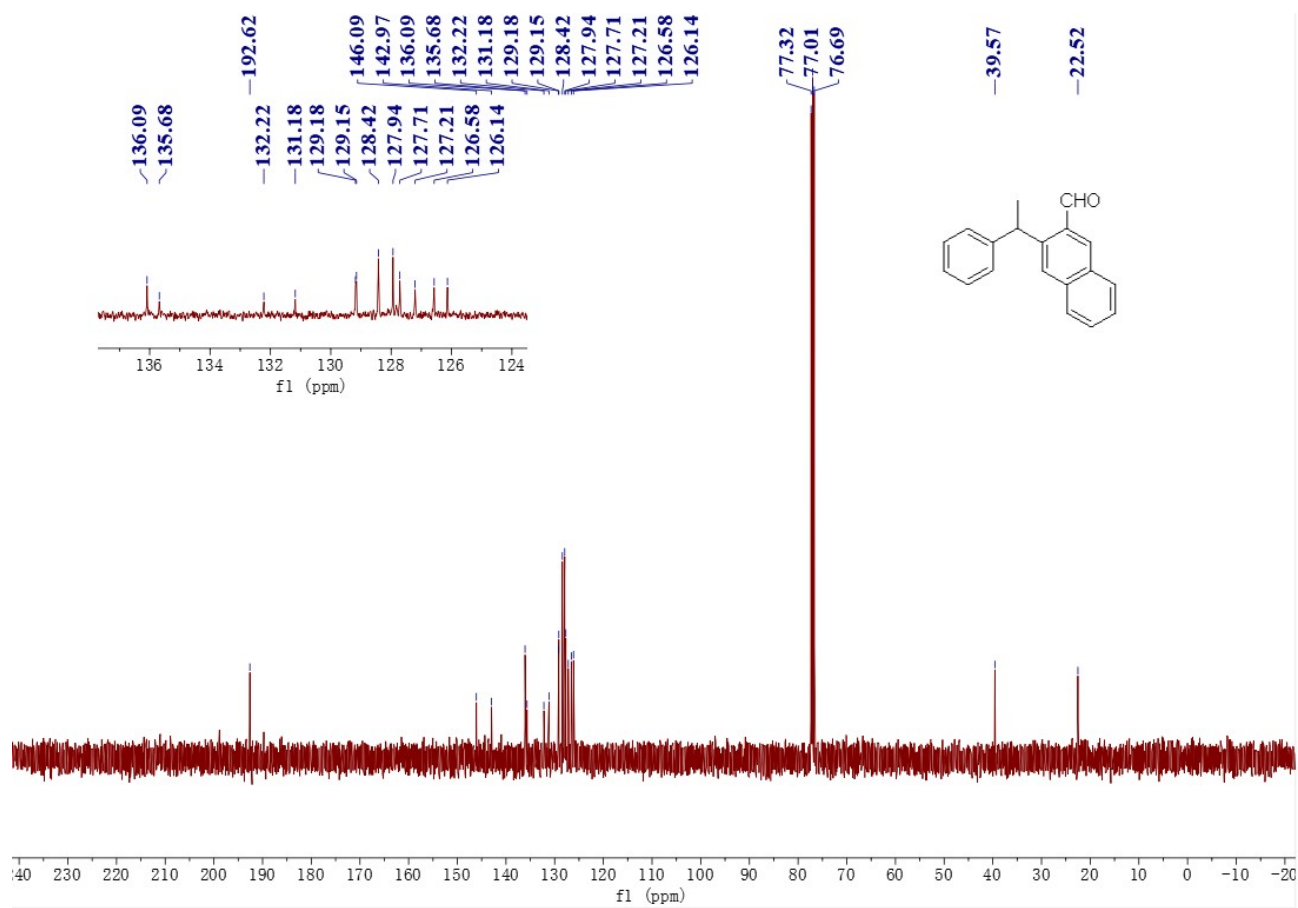

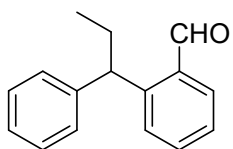

### 2-(1-phenylpropyl)benzaldehyde (2p)

A colorless oil. 26.9 mg, 60% yield.  $^1\text{H}$  NMR ( $\text{CDCl}_3$ , TMS, 400 MHz)  $\delta$  10.36 (s, 1H), 7.80 (d,  $J = 7.8$  Hz, 1H), 7.54 (t,  $J = 7.6$  Hz, 1H), 7.44 (d,  $J = 7.8$  Hz, 1H), 7.35 (t,  $J = 7.6$  Hz, 1H), 7.29-7.23 (m, 4H), 7.17 (t,  $J = 7.0$  Hz, 1H), 4.98 (t,  $J = 7.6$  Hz, 1H), 2.19-2.00 (m, 2H), 0.93 (t,  $J = 7.2$  Hz, 3H).  $^{13}\text{C}$  NMR ( $\text{CDCl}_3$ , TMS, 100 MHz)  $\delta$  192.5, 147.5, 144.2, 133.8, 132.0, 128.4, 128.3, 128.2, 126.5, 126.2, 77.3, 29.1, 12.6. IR (acetone)  $\nu$  3027, 2957, 2931, 1690, 1573, 1494, 1408, 1285, 700, 660  $\text{cm}^{-1}$ . HRMS (EI) calcd. for  $\text{C}_{16}\text{H}_{16}\text{O}$  ( $\text{M}^+$ ): 224.1196, Found: 224.1201.

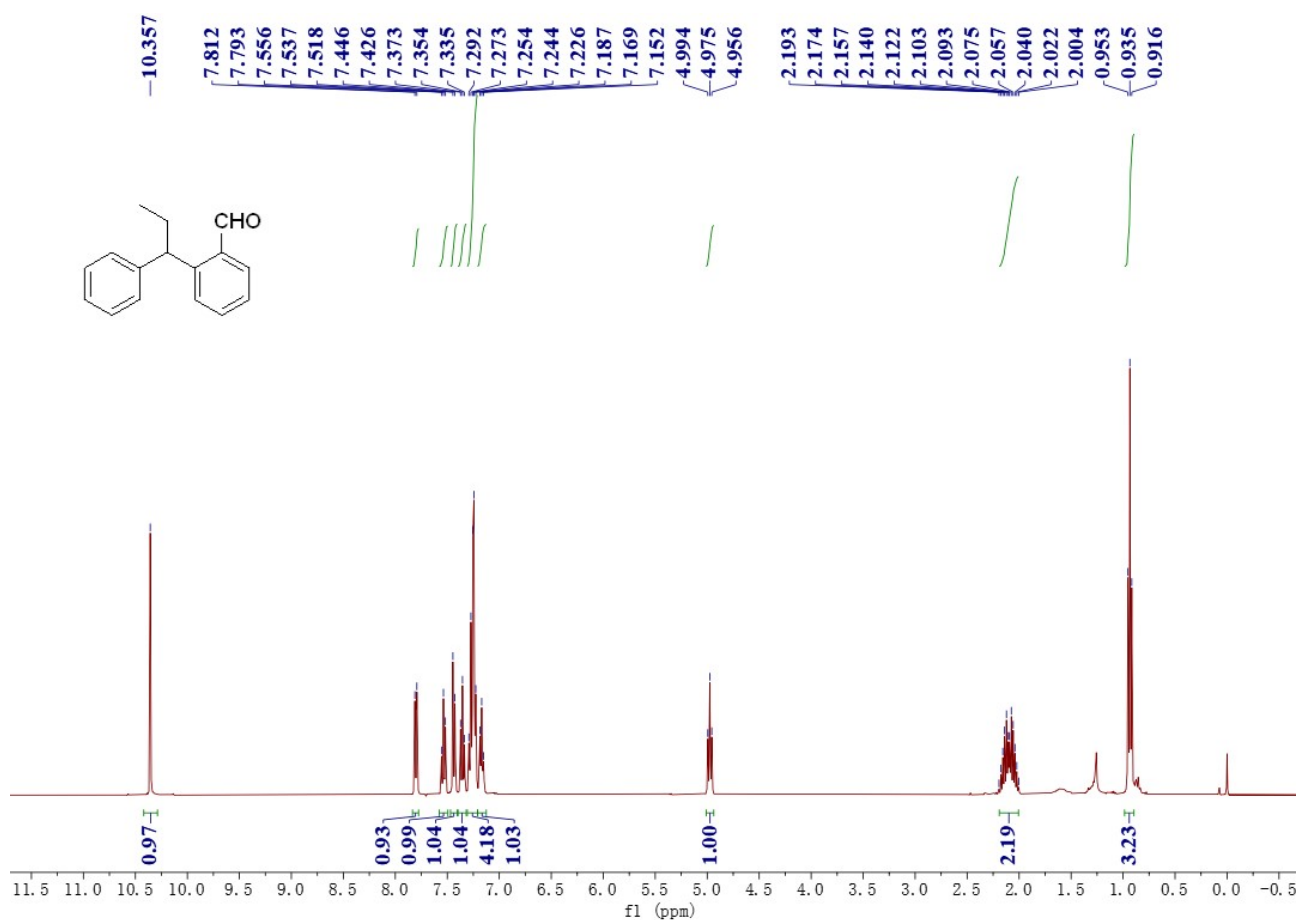

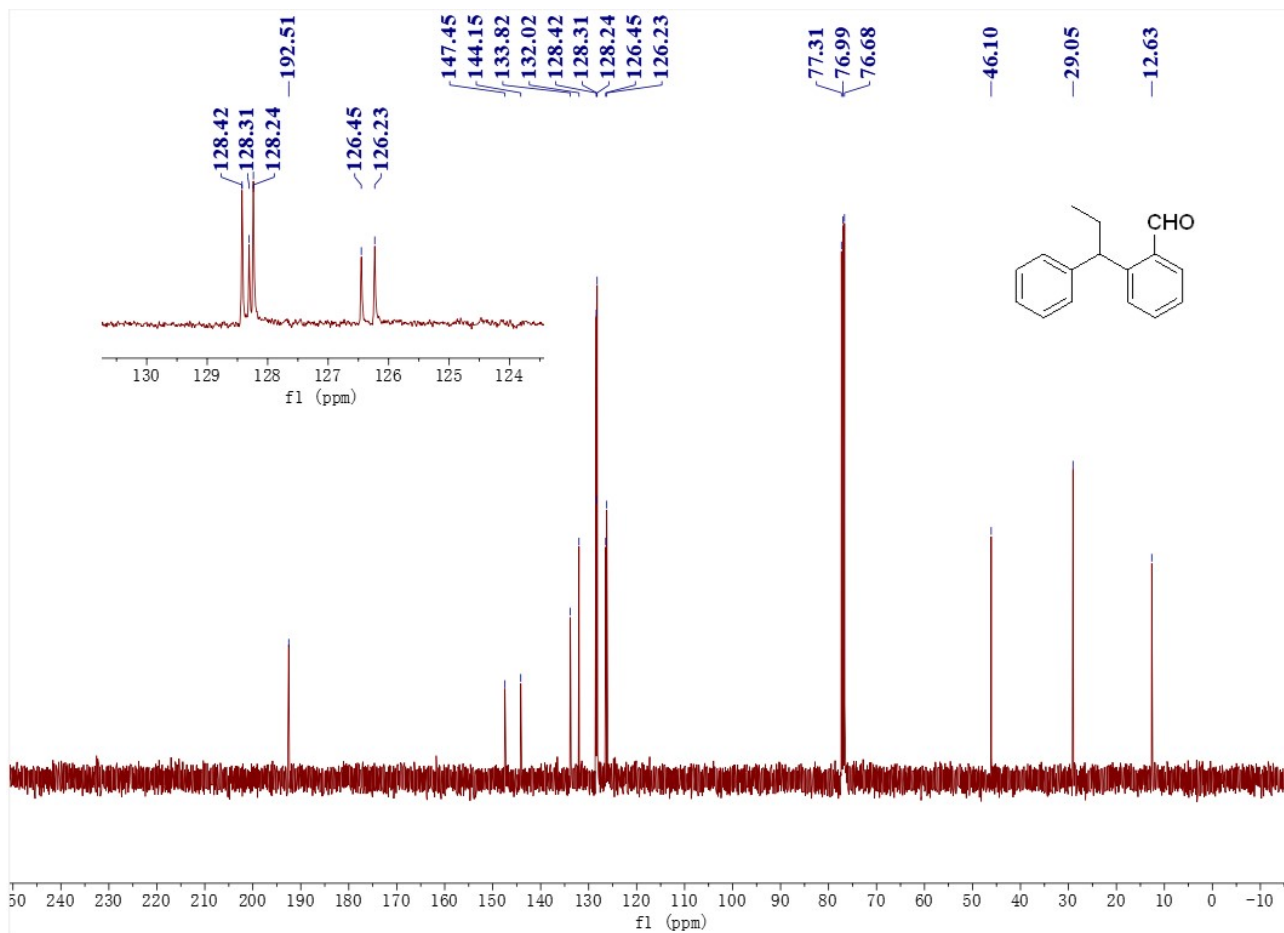

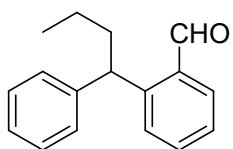

### 2-(1-phenylbutyl)benzaldehyde (2q)

A colorless oil. 11.9 mg, 25% yield.  $^1\text{H}$  NMR ( $\text{CDCl}_3$ , TMS, 400 MHz)  $\delta$  10.36 (s, 1H), 7.80 (dd,  $J = 7.6, 1.6$  Hz, 1H), 7.54 (td,  $J = 7.6, 1.6$  Hz, 1H), 7.45 (dd,  $J = 8.0, 1.4$  Hz, 1H), 7.36 (td,  $J = 7.6, 1.4$  Hz, 1H), 7.29-7.23 (m, 4H), 7.19-7.15 (m, 1H), 5.10 (t,  $J = 7.6$  Hz, 1H), 2.08-2.00 (m, 2H), 1.37-1.28 (m, 2H), 0.93 (t,  $J = 7.6$  Hz, 3H).  $^{13}\text{C}$  NMR ( $\text{CDCl}_3$ , TMS, 100 MHz)  $\delta$  192.5, 147.6, 144.3, 133.9, 133.6, 132.0, 128.4, 128.3, 128.2, 126.4, 126.2, 44.0, 38.4, 21.1, 14.1. IR (acetone)  $\nu$  3028, 2957, 2931, 2870, 1627, 1494, 1452, 1203, 756, 660  $\text{cm}^{-1}$ . HRMS (EI) calcd. for  $\text{C}_{17}\text{H}_{18}\text{O}$  ( $\text{M}^+$ ): 238.1352, Found: 238.1354.

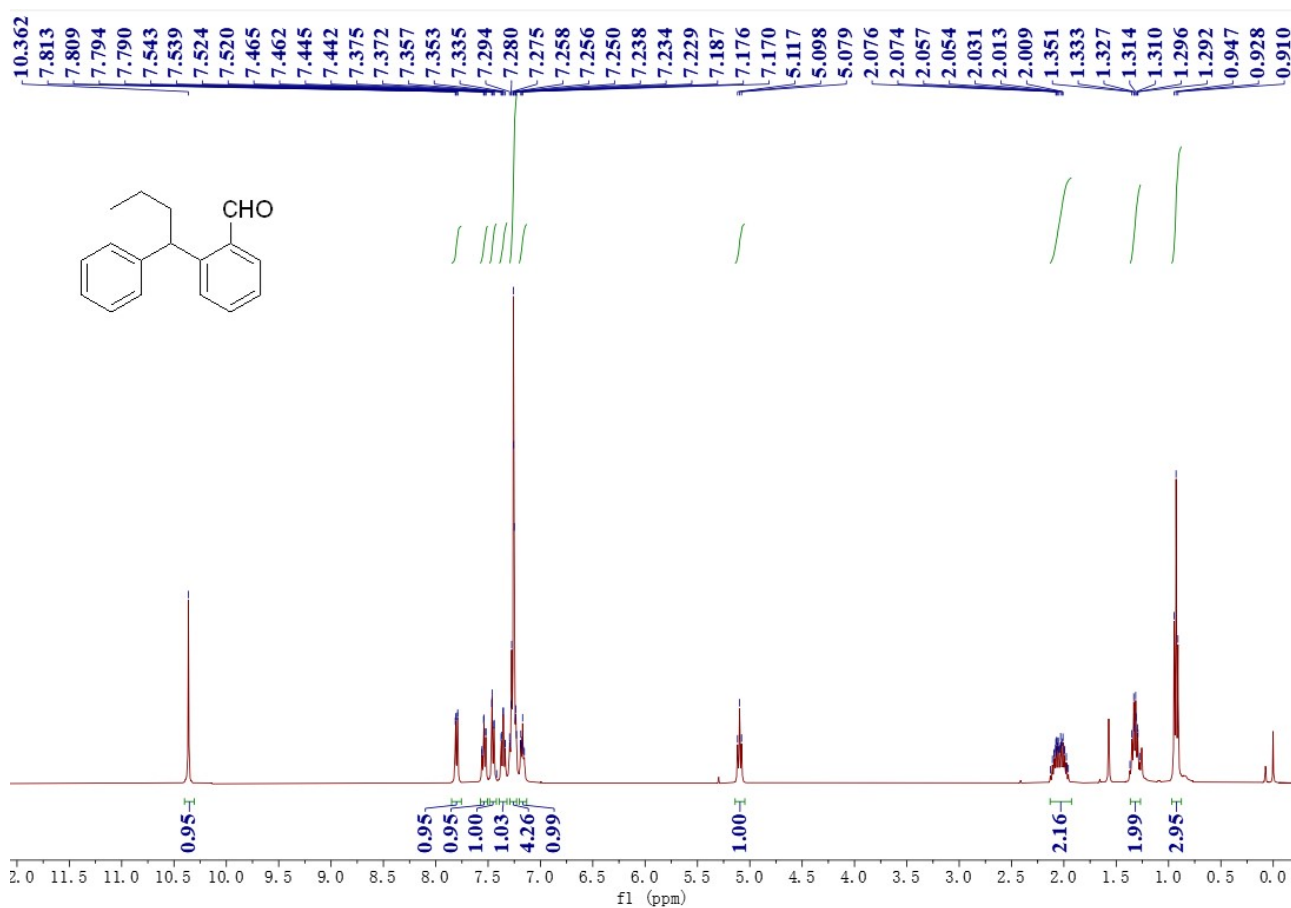



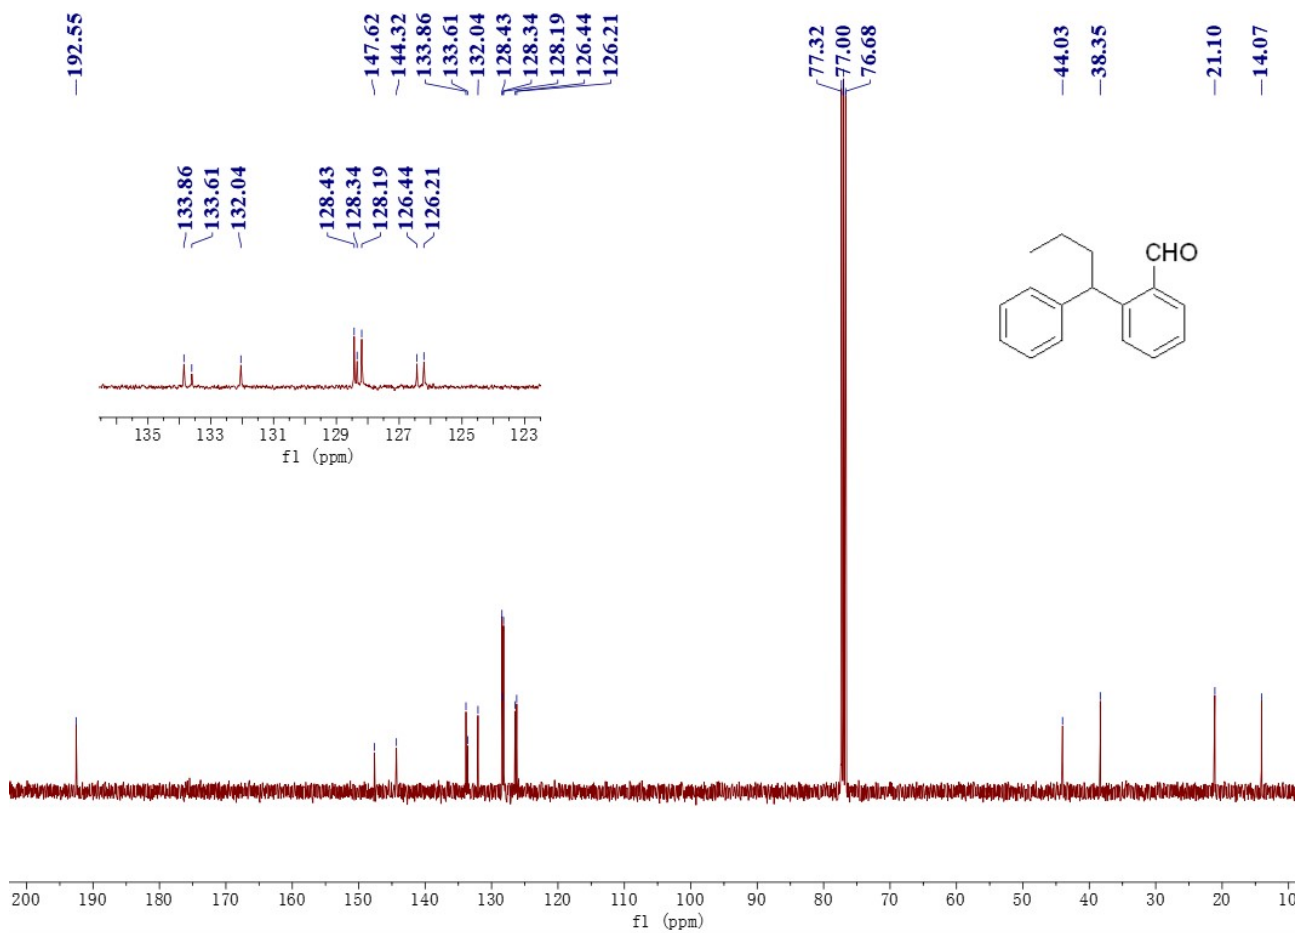

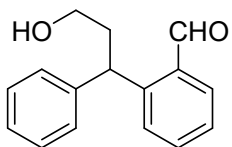

### 2-(3-hydroxy-1-phenylpropyl)benzaldehyde (2r)

A colorless oil. 28.8 mg, 60% yield.  $^1\text{H}$  NMR ( $\text{CDCl}_3$ , TMS, 400 MHz)  $\delta$  10.31 (s, 1H), 7.79 (d,  $J$  = 7.6 Hz, 1H), 7.53-7.49 (m, 1H), 7.40-7.34 (m, 2H), 7.30-7.24 (m, 4H), 7.21-7.17 (m, 1H), 5.35 (t,  $J$  = 7.6 Hz, 1H), 3.66-3.52 (m, 2H), 2.44-2.36 (m, 1H), 2.29-2.20 (m, 1H), 2.10 (s, 1H).  $^{13}\text{C}$  NMR ( $\text{CDCl}_3$ , TMS, 100 MHz)  $\delta$  193.5, 147.0, 143.6, 134.0, 133.7, 133.0, 128.8, 128.6, 128.2, 126.7, 126.5, 60.5, 40.2, 38.6. IR (acetone)  $\nu$  3389, 3026, 2936, 2875, 1626, 1494, 1451, 1206, 758, 700  $\text{cm}^{-1}$ . HRMS (EI) calcd. for  $\text{C}_{16}\text{H}_{14}\text{O}$  ( $\text{M}-\text{H}_2\text{O}$ ) $^+$ : 222.1039, Found: 222.1039.

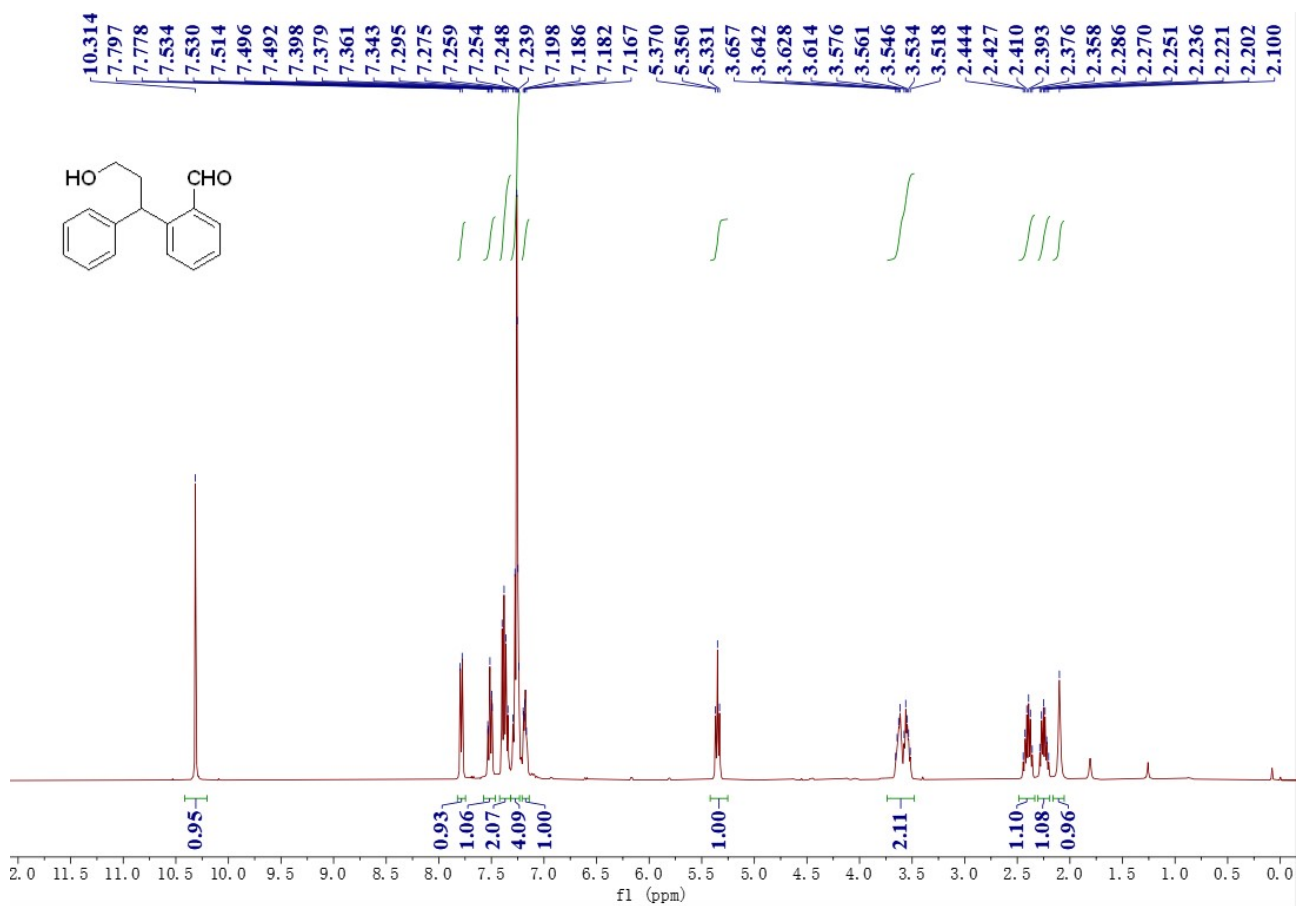

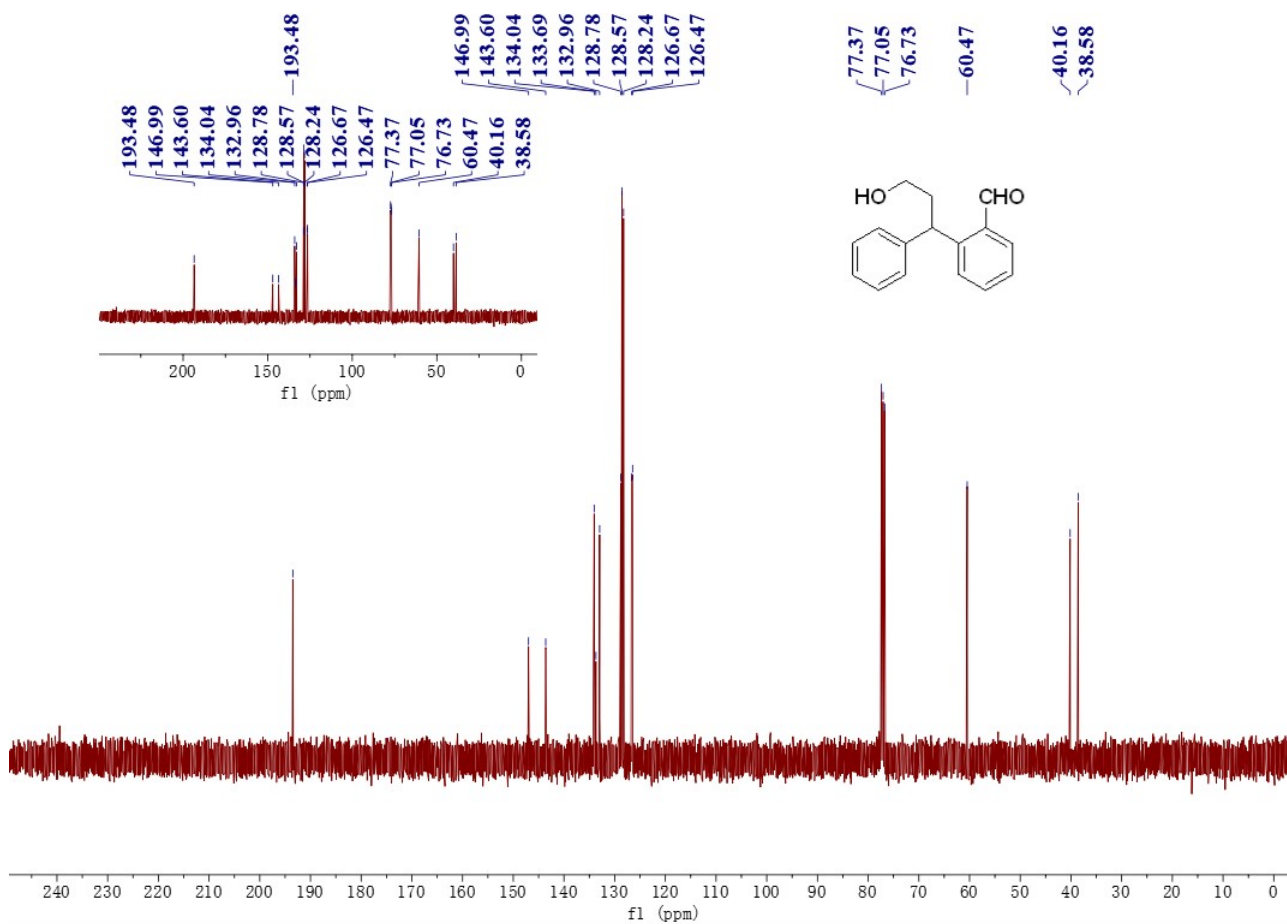

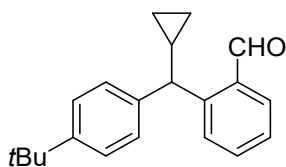

## 2-((4-(tert-butyl)phenyl)(cyclopropyl)methyl)benzaldehyde (2s)

A colorless oil. 53.8 mg, 92% yield.  $^1\text{H}$  NMR ( $\text{CDCl}_3$ , TMS, 400 MHz)  $\delta$  10.22 (s, 1H), 7.81 (dd,  $J = 7.8, 1.6$  Hz, 1H), 7.64 (dd,  $J = 8.0, 1.4$  Hz, 1H), 7.57 (td,  $J = 7.6, 1.6$  Hz, 1H), 7.37 (td,  $J = 7.6, 1.4$  Hz, 1H), 7.28-7.26 (m, 2H), 7.17-7.15 (m, 2H), 4.26 (d,  $J = 9.4$  Hz, 1H), 1.38-1.28 (m, 1H), 1.28 (s, 9H), 0.79-0.70 (m, 1H), 0.62-0.56 (m, 1H), 0.48-0.42 (m, 1H), 0.25-0.20 (m, 1H).  $^{13}\text{C}$  NMR ( $\text{CDCl}_3$ , TMS, 150 MHz)  $\delta$  192.4, 149.0, 147.7, 141.5, 133.8, 133.6, 131.1, 129.6, 127.7, 126.6, 125.3, 49.3, 34.4, 31.4, 17.3, 6.5, 4.6. IR (acetone)  $\nu$  3001, 2961, 2866, 1693, 1461, 1409, 1201, 1019, 755, 659  $\text{cm}^{-1}$ . HRMS (EI) calcd. for  $\text{C}_{21}\text{H}_{24}\text{O}$  ( $\text{M}^+$ ): 292.1822, Found: 292.1831.

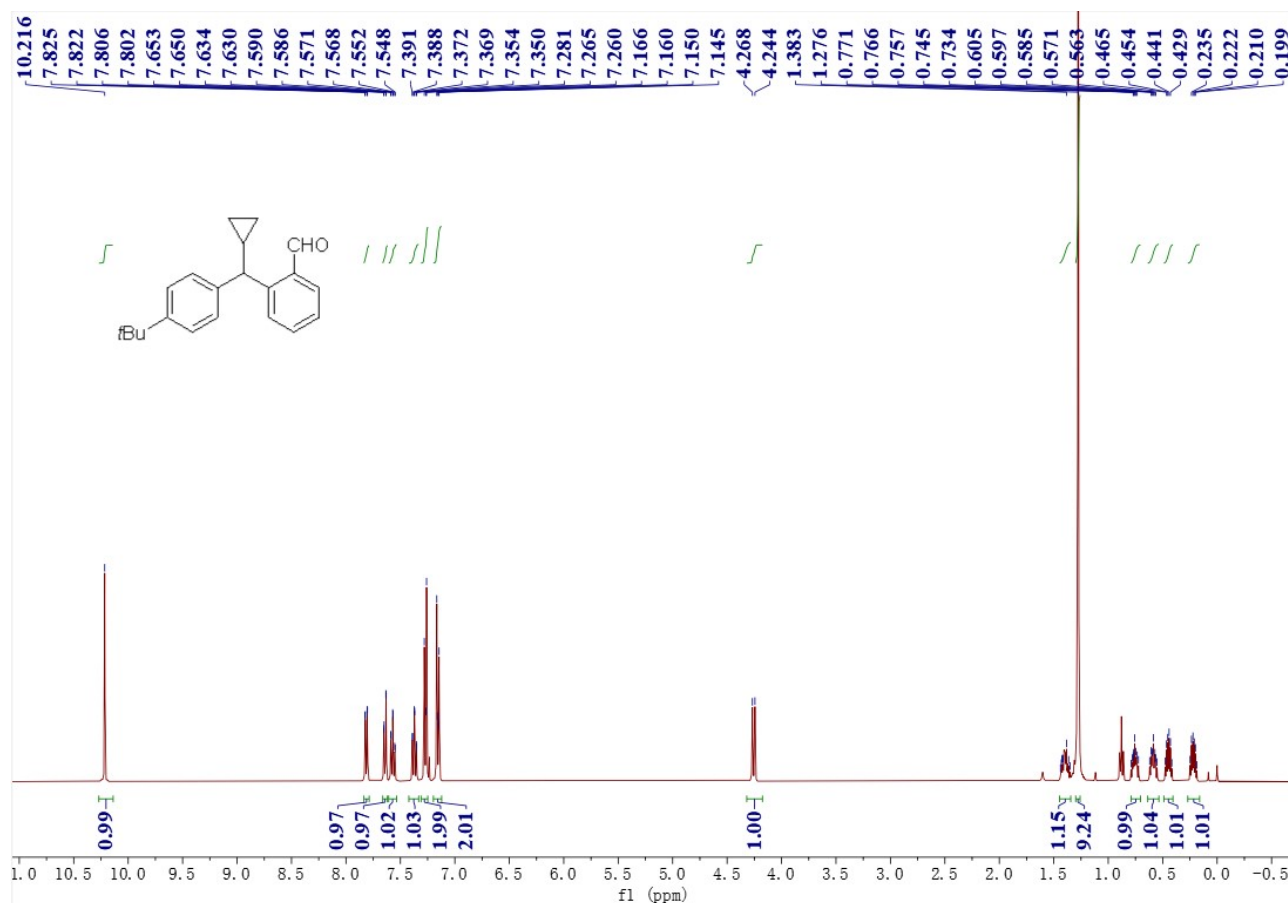

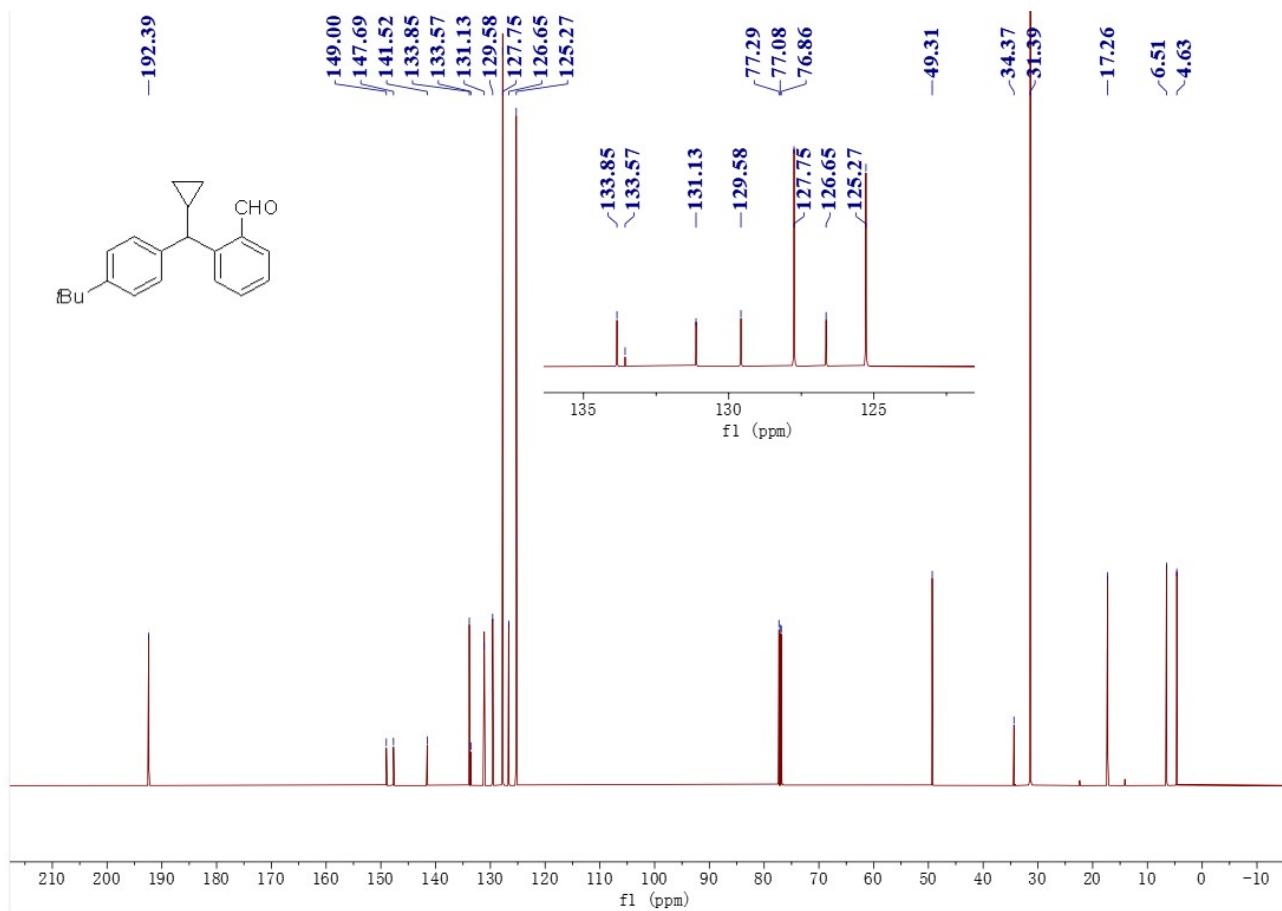

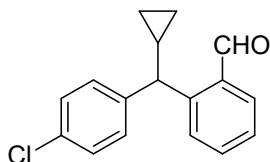

### 2-((4-chlorophenyl)(cyclopropyl)methyl)benzaldehyde (2t)

A colorless oil. 51.4 mg, 95% yield.  $^1\text{H}$  NMR ( $\text{CDCl}_3$ , TMS, 400 MHz)  $\delta$  10.13 (s, 1H), 7.81-7.78 (m, 1H), 7.65-7.57 (m, 2H), 7.42 (td,  $J = 7.4, 1.4$  Hz, 1H), 7.23-7.15 (m, 4H), 4.36 (d,  $J = 9.4$  Hz, 1H), 1.36-1.34 (m, 1H), 0.74-0.63 (m, 1H), 0.61-0.60 (m, 1H), 0.43-0.39 (m, 1H), 0.26-0.22 (m, 1H).  $^{13}\text{C}$  NMR ( $\text{CDCl}_3$ , TMS, 150 MHz)  $\delta$  192.5, 146.7, 143.2, 133.9, 133.5, 132.8, 132.0, 129.6, 129.5, 128.42, 128.41, 126.9, 49.0, 17.1, 6.2, 4.7. IR (acetone)  $\nu$  3073, 3001, 2857, 2740, 1692, 1573, 1450, 1020, 870, 657  $\text{cm}^{-1}$  HRMS (EI) calcd. for  $\text{C}_{17}\text{H}_{15}\text{ClO}$  ( $\text{M}^+$ ): 270.0806, Found: 270.0801.

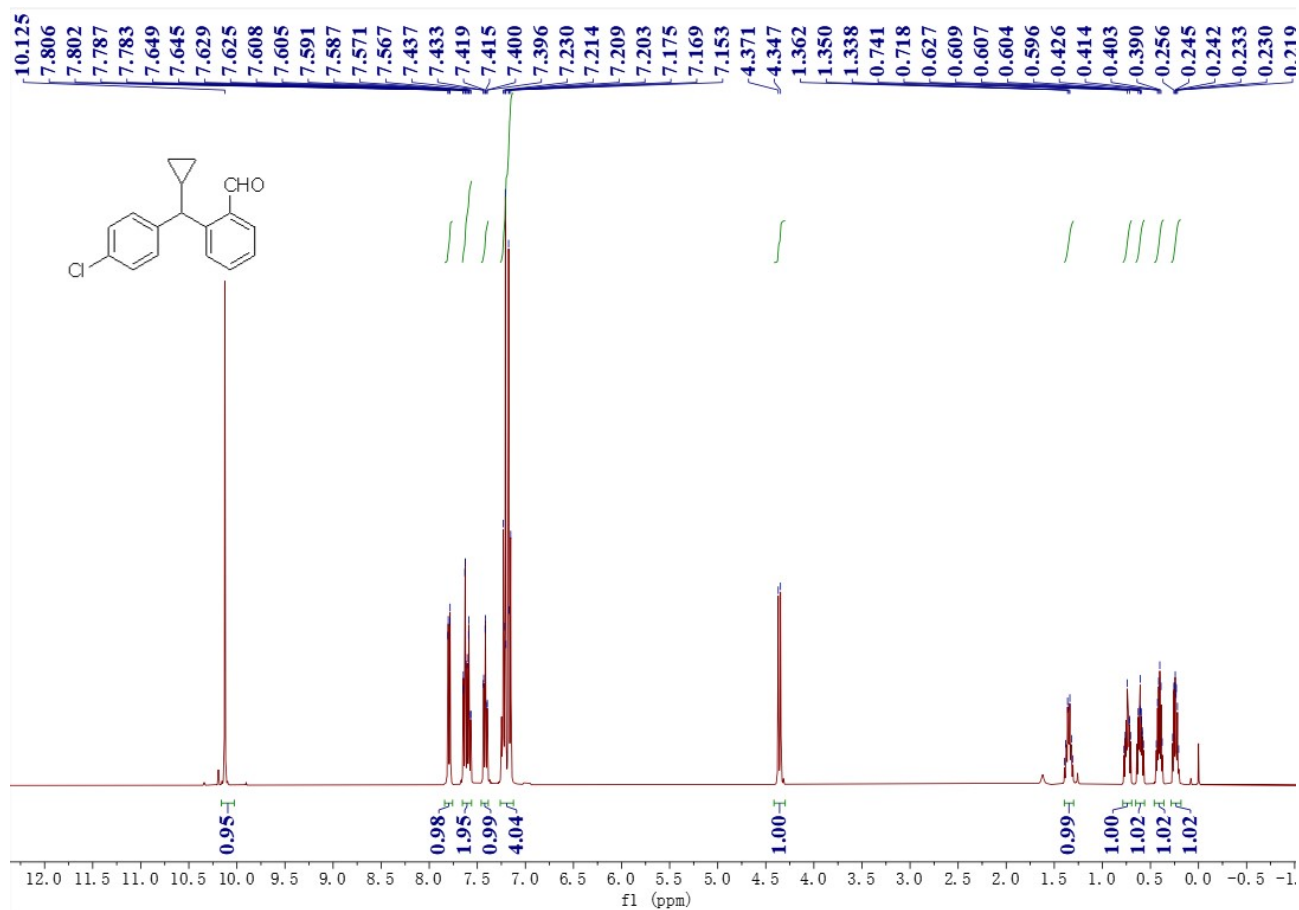

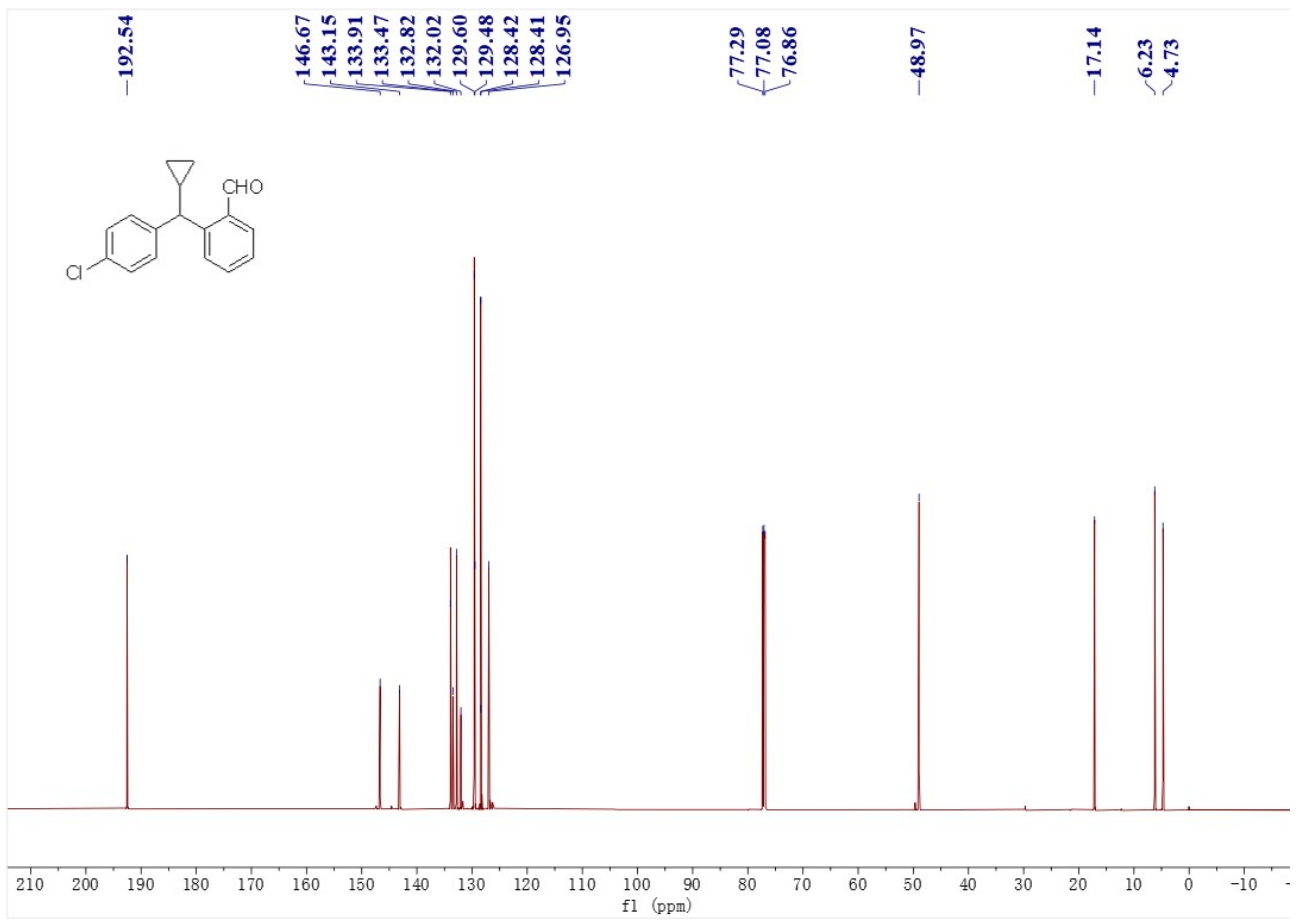

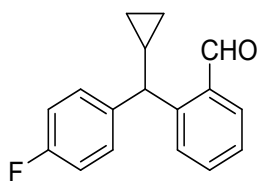

## 2-(cyclopropyl(4-fluorophenyl)methyl)benzaldehyde (2u)

A colorless oil. 38.7 mg, 76% yield.  $^1\text{H}$  NMR ( $\text{CDCl}_3$ , TMS, 400 MHz)  $\delta$  10.15 (s, 1H), 7.81 (d,  $J = 7.6$  Hz, 1H), 7.65 (d,  $J = 7.6$  Hz, 1H), 7.60 (t,  $J = 7.6$  Hz, 1H), 7.42 (t,  $J = 7.6$  Hz, 1H), 7.21-7.18 (m, 2H), 6.95 (t,  $J = 8.8$  Hz, 1H), 4.36 (d,  $J = 9.4$  Hz, 1H), 1.41-1.32 (m, 1H), 0.79-0.72 (m, 1H), 0.65-0.58 (m, 1H), 0.45-0.39 (m, 1H), 0.27-0.21 (m, 1H).  $^{13}\text{C}$  NMR ( $\text{CDCl}_3$ , TMS, 100 MHz)  $\delta$  192.5, 161.4 (d,  $J = 246.4$  Hz), 147.0, 140.3, 133.9, 133.5, 132.5, 129.6 (d,  $J = 8$  Hz), 129.4, 126.9, 115.1 (d,  $J = 21$  Hz), 48.8, 17.3, 6.2, 4.7.  $^{19}\text{F}$  NMR (376 MHz,  $\text{CDCl}_3$ )  $\delta$  -115.3. IR (acetone)  $\nu$  3063, 3001, 2860, 1690, 1597, 1572, 1450, 1408, 1019, 871, 699  $\text{cm}^{-1}$  HRMS (EI) calcd. for  $\text{C}_{17}\text{H}_{15}\text{FO}$  ( $\text{M}^+$ ): 254.1101, Found: 254.1105.

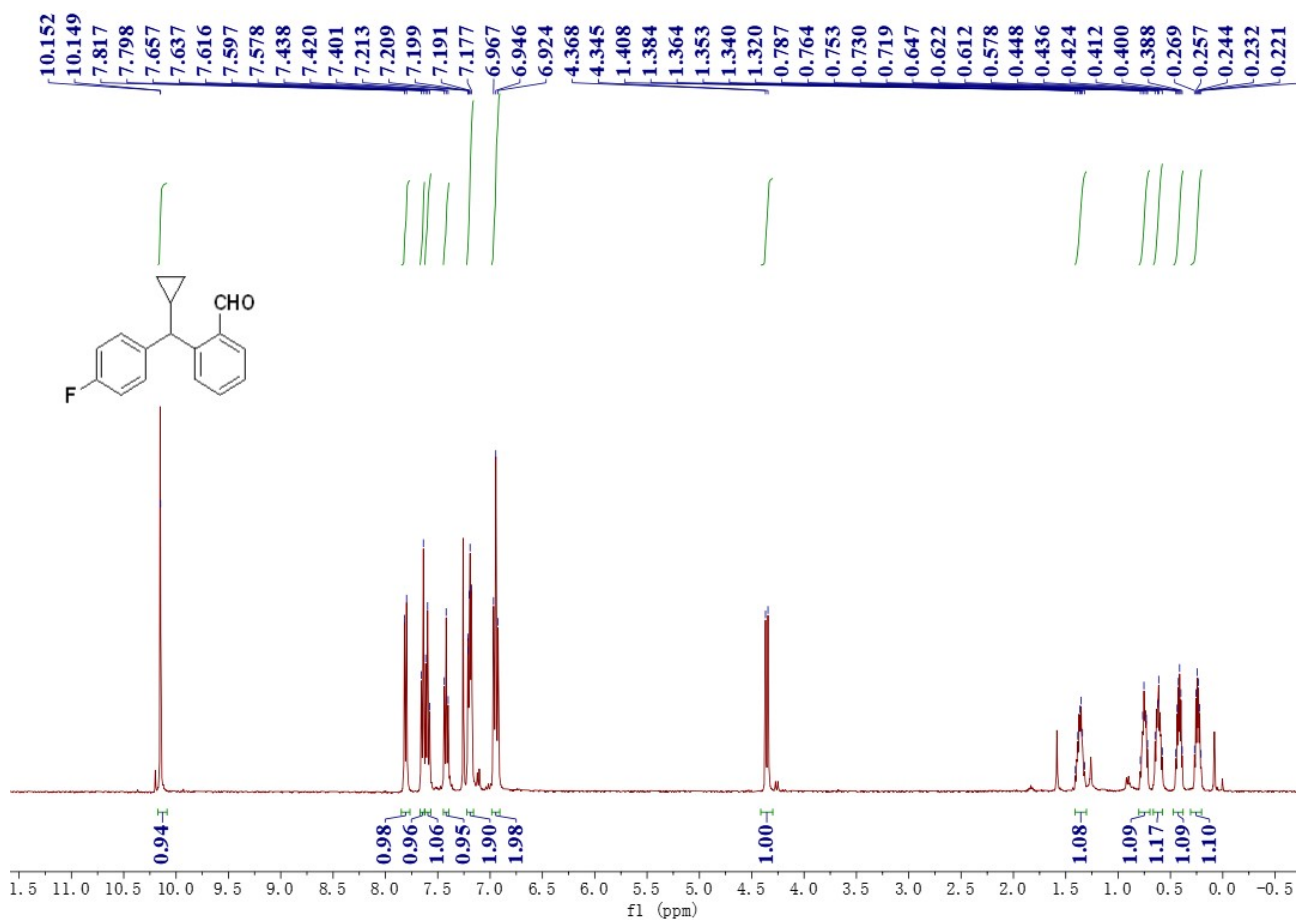



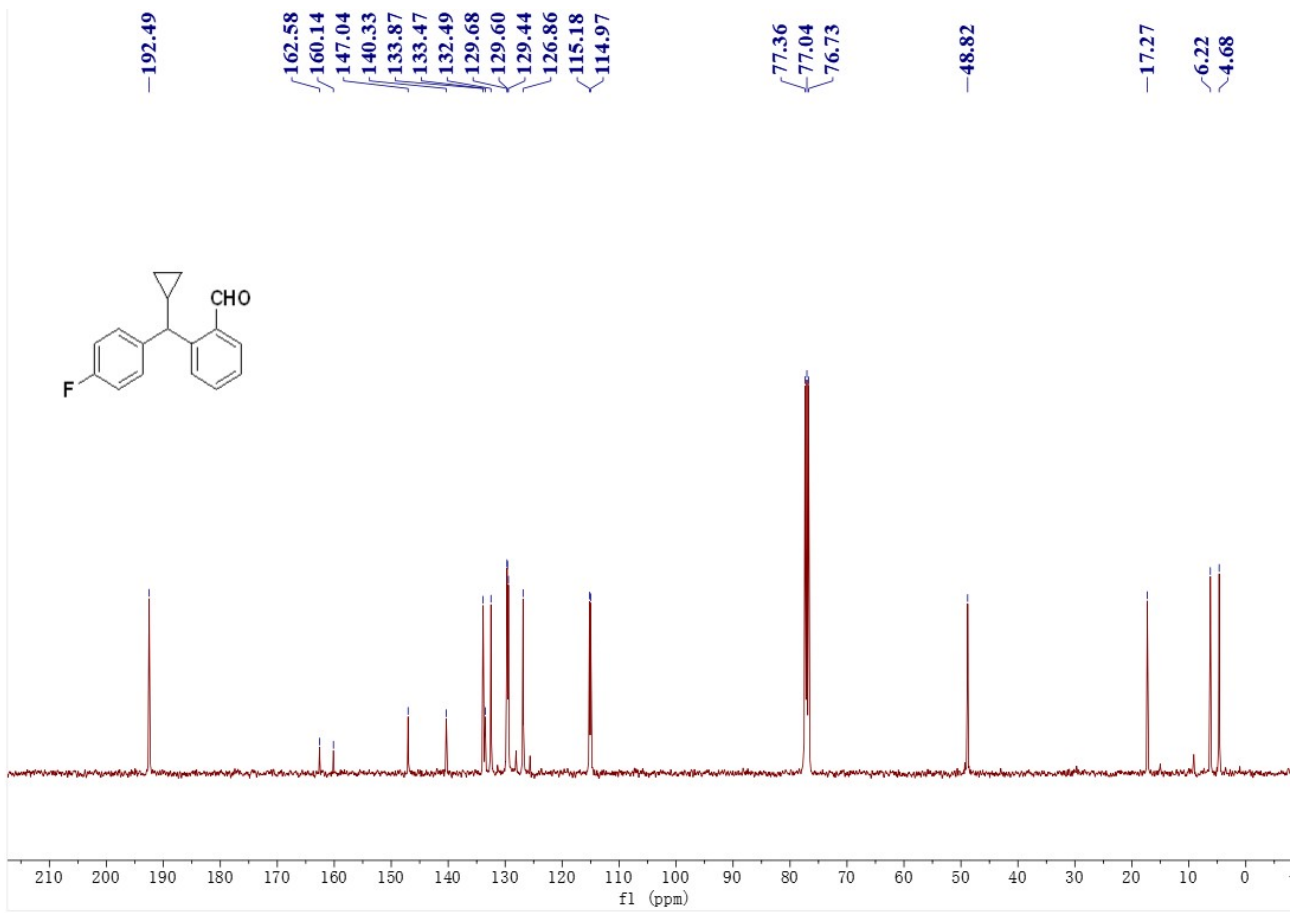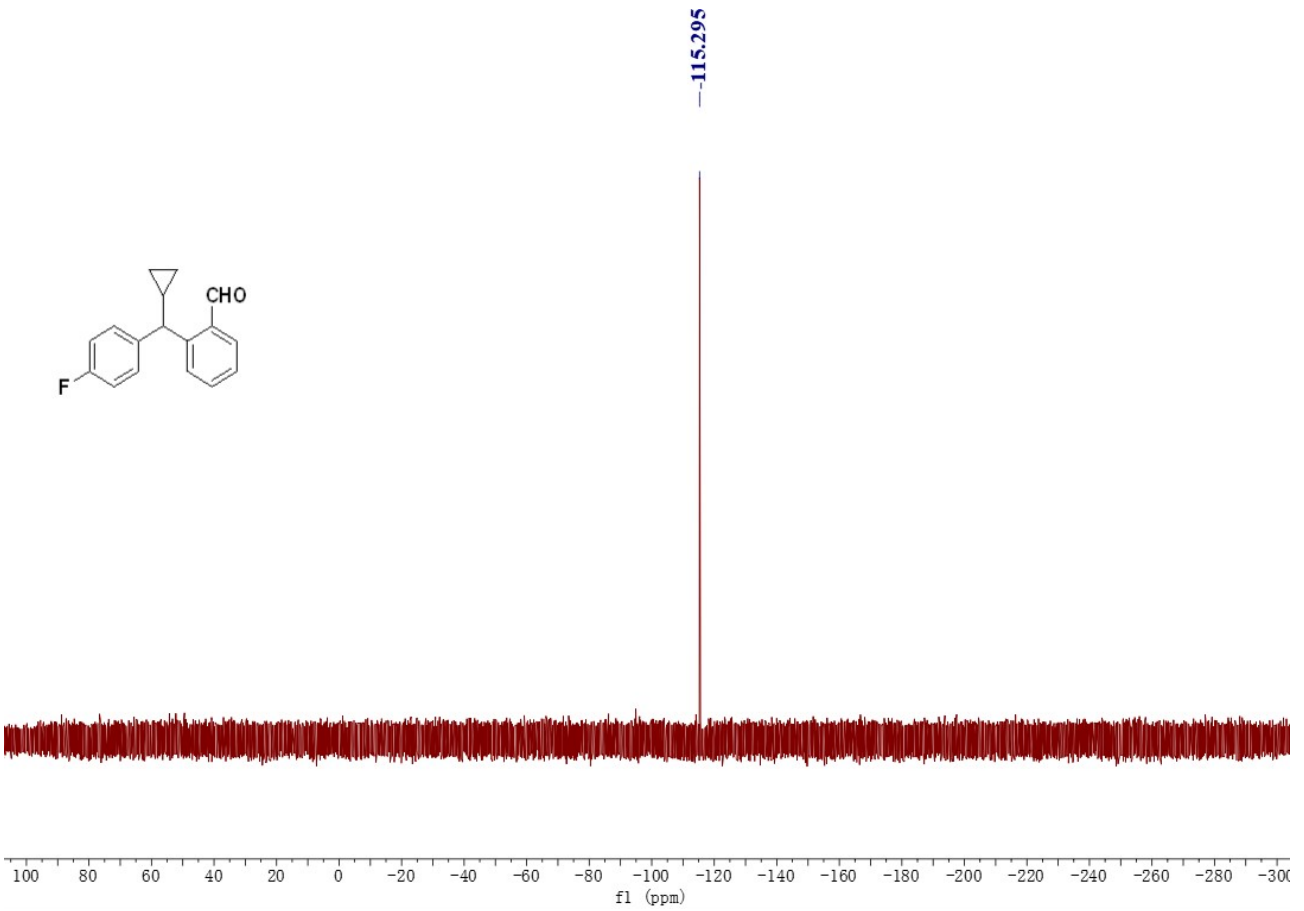

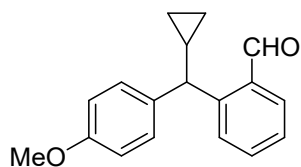

### 2-(cyclopropyl(4-methoxyphenyl)methyl)benzaldehyde (2v)

A colorless oil. 43.6 mg, 82% yield.  $^1\text{H}$  NMR ( $\text{CDCl}_3$ , TMS, 400 MHz)  $\delta$  10.20 (s, 1H), 7.81 (dd,  $J = 7.6, 1.6$  Hz, 1H), 7.66 (dd,  $J = 7.6, 1.4$  Hz, 1H), 7.58 (td,  $J = 7.6, 1.6$  Hz, 1H), 7.39 (td,  $J = 7.4, 1.4$  Hz, 1H), 7.14 (d,  $J = 8.6$  Hz, 2H), 6.80 (d,  $J = 8.6$  Hz, 2H), 4.27 (d,  $J = 9.2$  Hz, 1H), 3.76 (s, 3H), 1.41-1.32 (m, 1H), 0.78-0.71 (m, 1H), 0.63-0.56 (m, 1H), 0.45-0.39 (m, 1H), 0.25-0.19 (m, 1H).  $^{13}\text{C}$  NMR ( $\text{CDCl}_3$ , TMS, 100 MHz)  $\delta$  192.4, 157.9, 147.6, 136.8, 133.8, 133.5, 131.5, 129.4, 129.1, 126.6, 113.7, 55.2, 48.8, 17.2, 6.2, 4.6. IR (acetone)  $\nu$  3002, 2955, 2835, 1693, 1491, 1463, 1248, 1035, 758,  $700\text{ cm}^{-1}$ . HRMS (EI) calcd. for  $\text{C}_{18}\text{H}_{18}\text{O}_2$  ( $\text{M}^+$ ): 266.1301, Found: 266.1303.

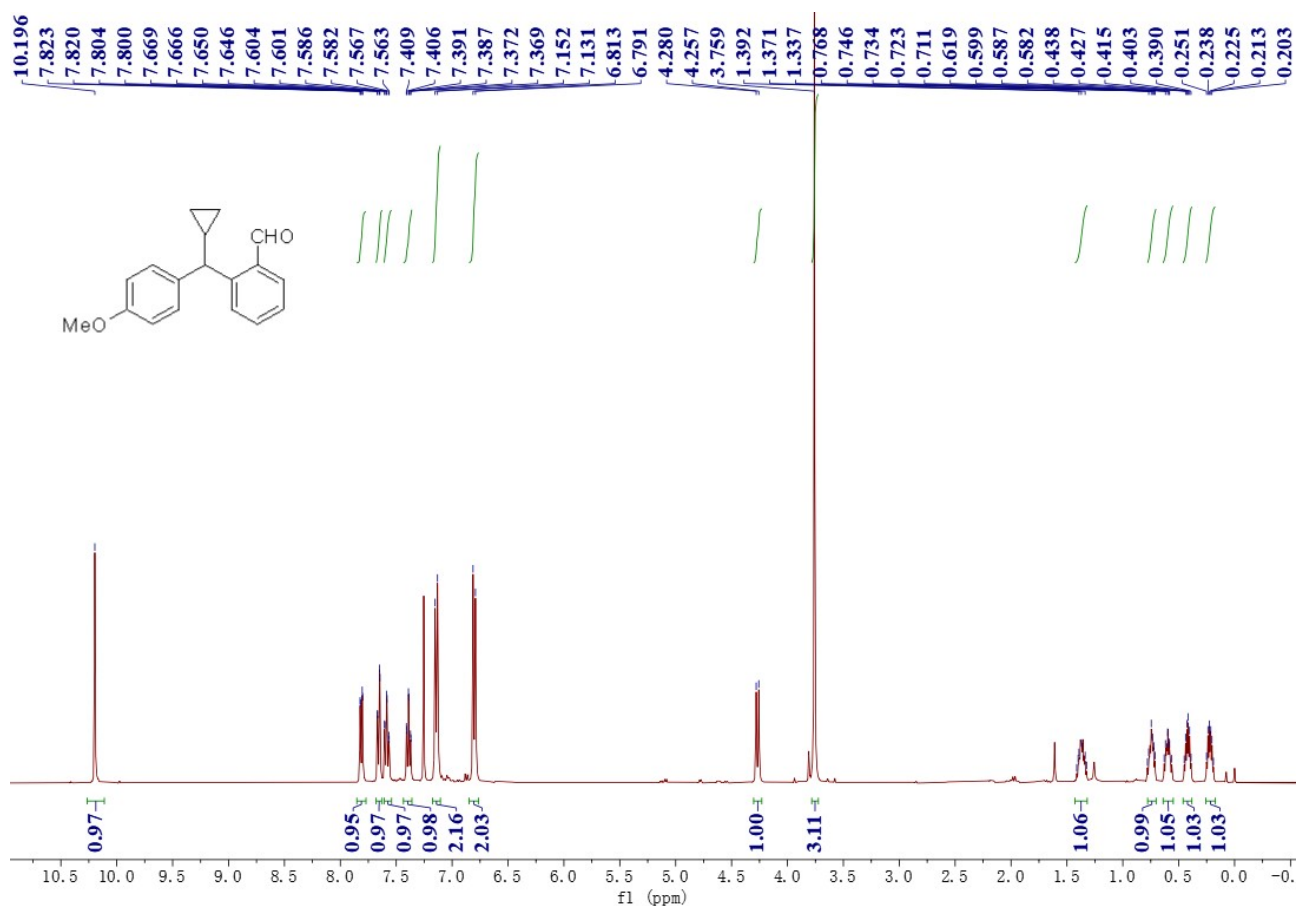

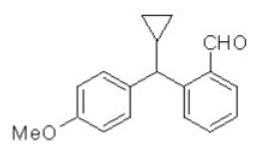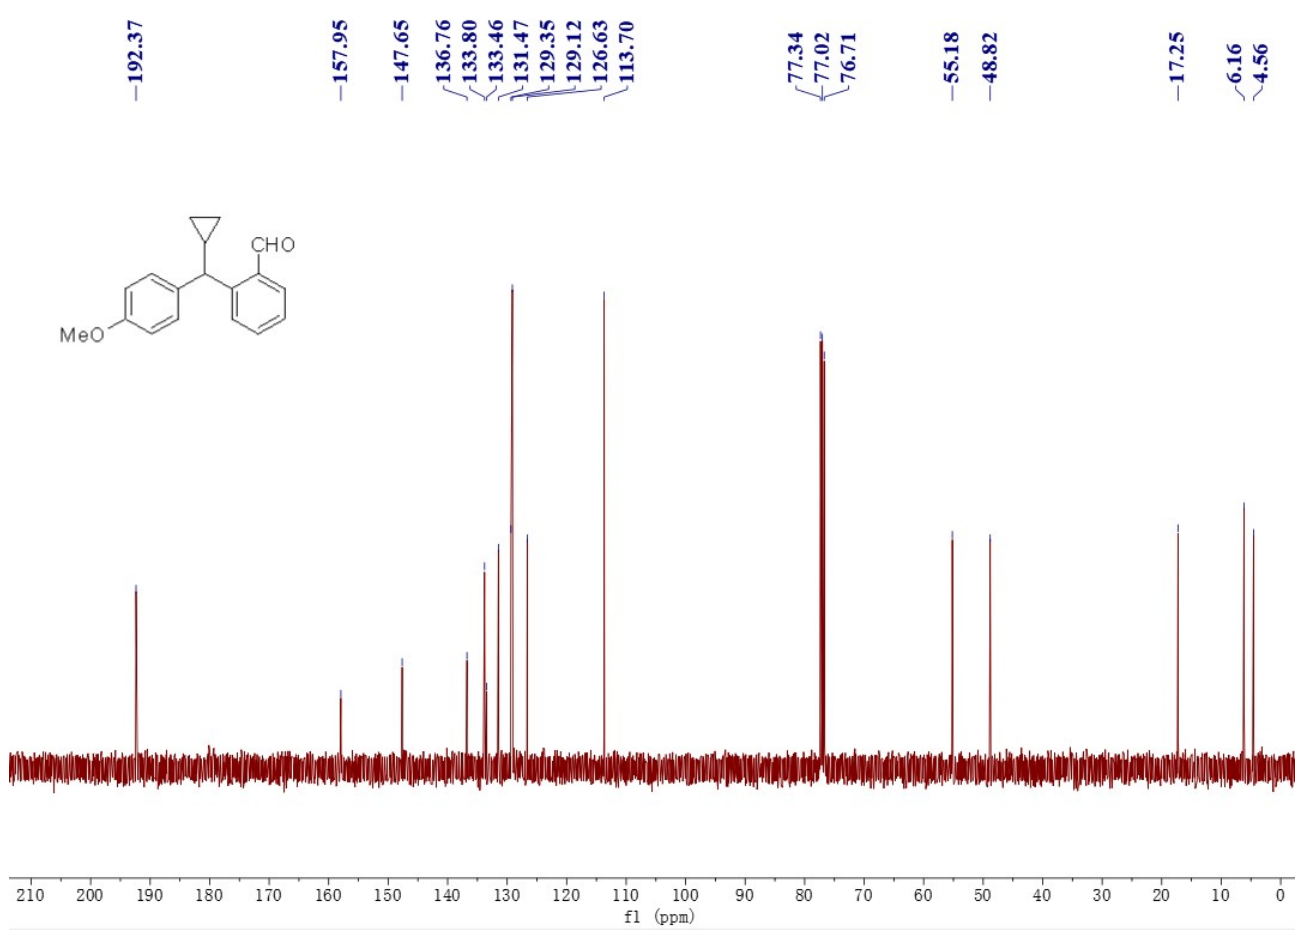

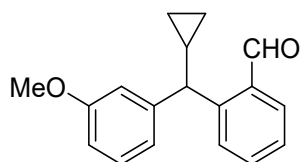

### 2-(cyclopropyl(3-methoxyphenyl)methyl)benzaldehyde (2w)

A colorless oil. 31.9 mg, 60% yield.  $^1\text{H}$  NMR ( $\text{CDCl}_3$ , TMS, 400 MHz)  $\delta$  10.20 (s, 1H), 7.81 (dd,  $J = 7.8, 1.6$  Hz, 1H), 7.64 (dd,  $J = 7.8, 1.4$  Hz, 1H), 7.57 (td,  $J = 7.6, 1.6$  Hz, 1H), 7.39 (td,  $J = 7.6, 1.4$  Hz, 1H), 7.18 (t,  $J = 8.0$  Hz, 1H), 6.83-6.80 (m, 2H), 6.72 (dd,  $J = 8.2, 2.6$  Hz, 1H), 4.29 (d,  $J = 9.4$  Hz, 1H), 3.75 (s, 3H), 1.43-1.34 (m, 1H), 0.80-0.73 (m, 1H), 0.64-0.57 (m, 1H), 0.48-0.42 (m, 1H), 0.27-0.21 (m, 1H).  $^{13}\text{C}$  NMR ( $\text{CDCl}_3$ , TMS, 150 MHz)  $\delta$  192.4, 159.6, 147.2, 146.3, 134.0, 133.9, 133.5, 131.6, 129.54, 129.53, 129.3, 126.8, 126.7, 120.8, 114.6, 114.5, 111.0, 55.1, 49.7, 17.2, 6.4, 4.7. IR (acetone)  $\nu$  3071, 2955, 2835, 1693, 1490, 1463, 1179, 1109, 758, 700  $\text{cm}^{-1}$ . HRMS (EI) calcd. for  $\text{C}_{18}\text{H}_{18}\text{O}_2$  ( $\text{M}^+$ ): 266.1301, Found: 266.1298.

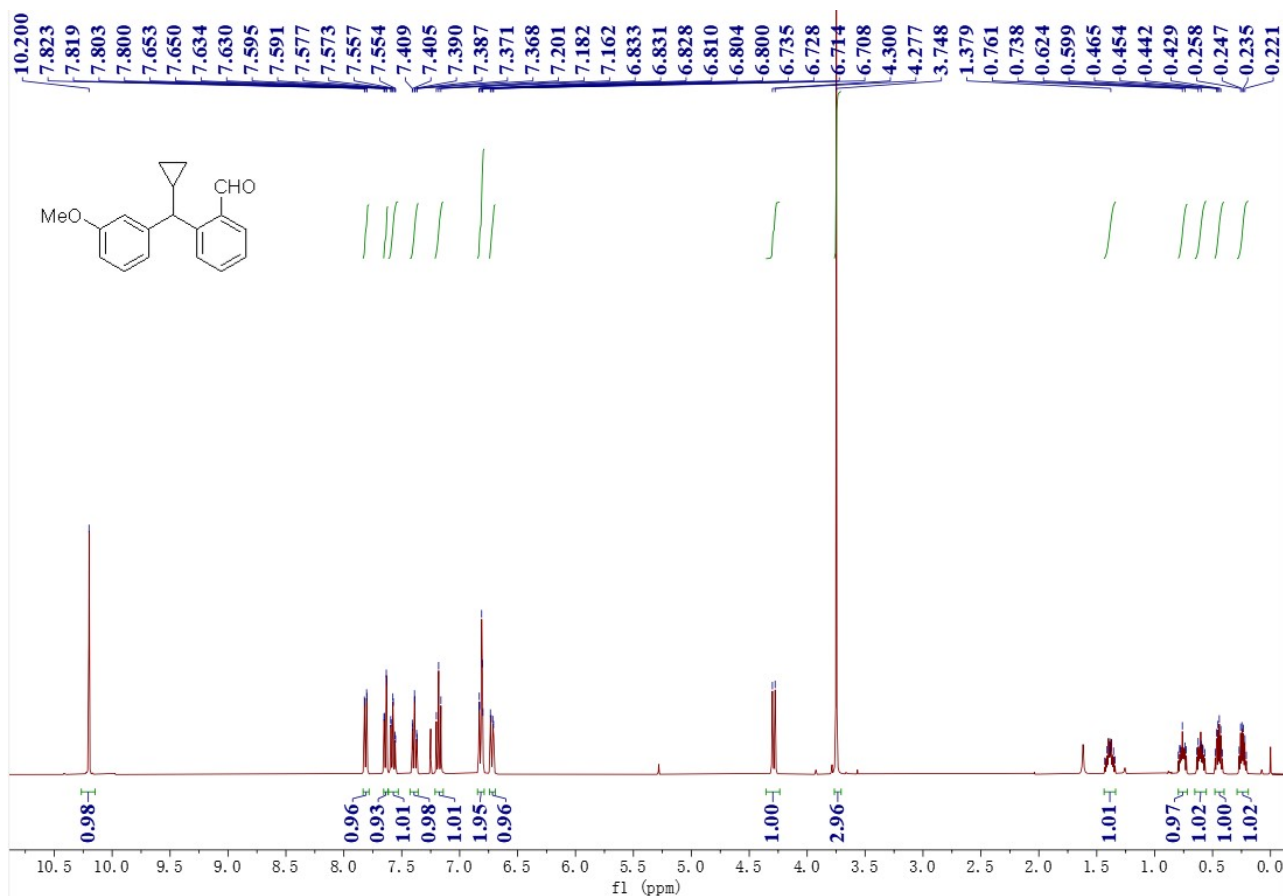

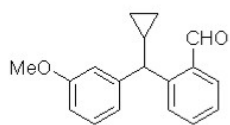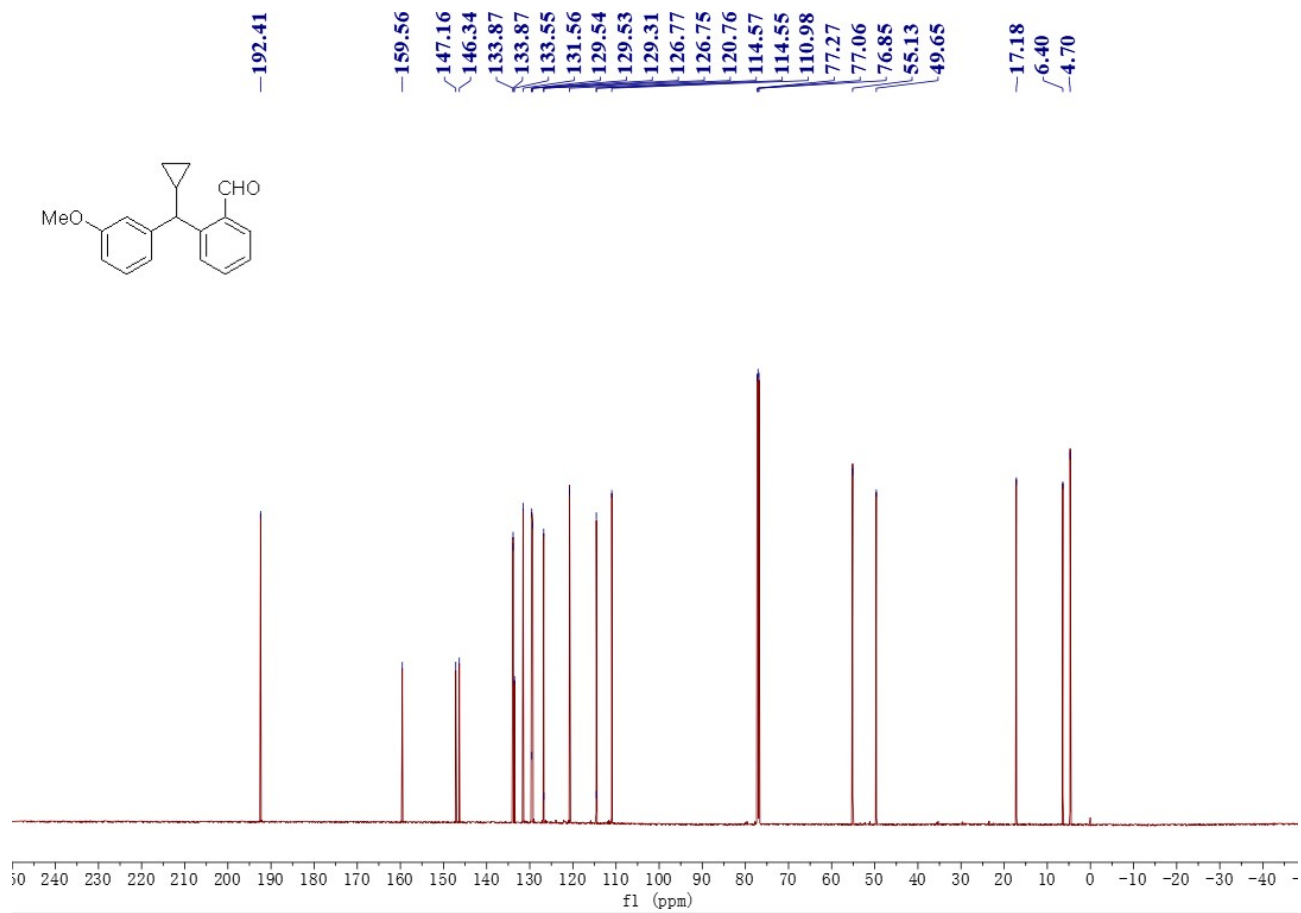

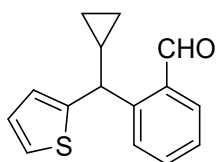

### 2-(cyclopropyl(thiophen-2-yl)methyl)benzaldehyde (2x)

A colorless oil. 41.2 mg, 85% yield.  $^1\text{H}$  NMR ( $\text{CDCl}_3$ , TMS, 400 MHz)  $\delta$  10.21 (s, 1H), 7.84 (d,  $J = 7.8$  Hz, 1H), 7.62-7.57 (m, 2H), 7.43 (t,  $J = 6.8$  Hz, 1H), 7.16 (d,  $J = 5.2$  Hz, 1H), 6.90 (t,  $J = 4.4$  Hz, 1H), 6.75 (d,  $J = 3.8$  Hz, 1H), 4.53 (d,  $J = 9.6$  Hz, 1H), 1.55-1.47 (m, H), 0.86-0.80 (m, 1H), 0.58-0.52 (m, 2H), 0.30-0.27 (m, 1H).  $^{13}\text{C}$  NMR ( $\text{CDCl}_3$ , TMS, 100 MHz)  $\delta$  192.4, 148.9, 146.6, 134.0, 133.3, 131.9, 129.4, 127.1, 126.5, 124.6, 123.9, 45.4, 18.4, 6.8, 4.5. IR (acetone)  $\nu$  3074, 3001, 2857, 1692, 1450, 1293, 1183, 1020, 750, 696  $\text{cm}^{-1}$ . HRMS (EI) calcd. for  $\text{C}_{15}\text{H}_{14}\text{OS}$  ( $\text{M}^+$ ): 242.0760, Found: 242.0763.

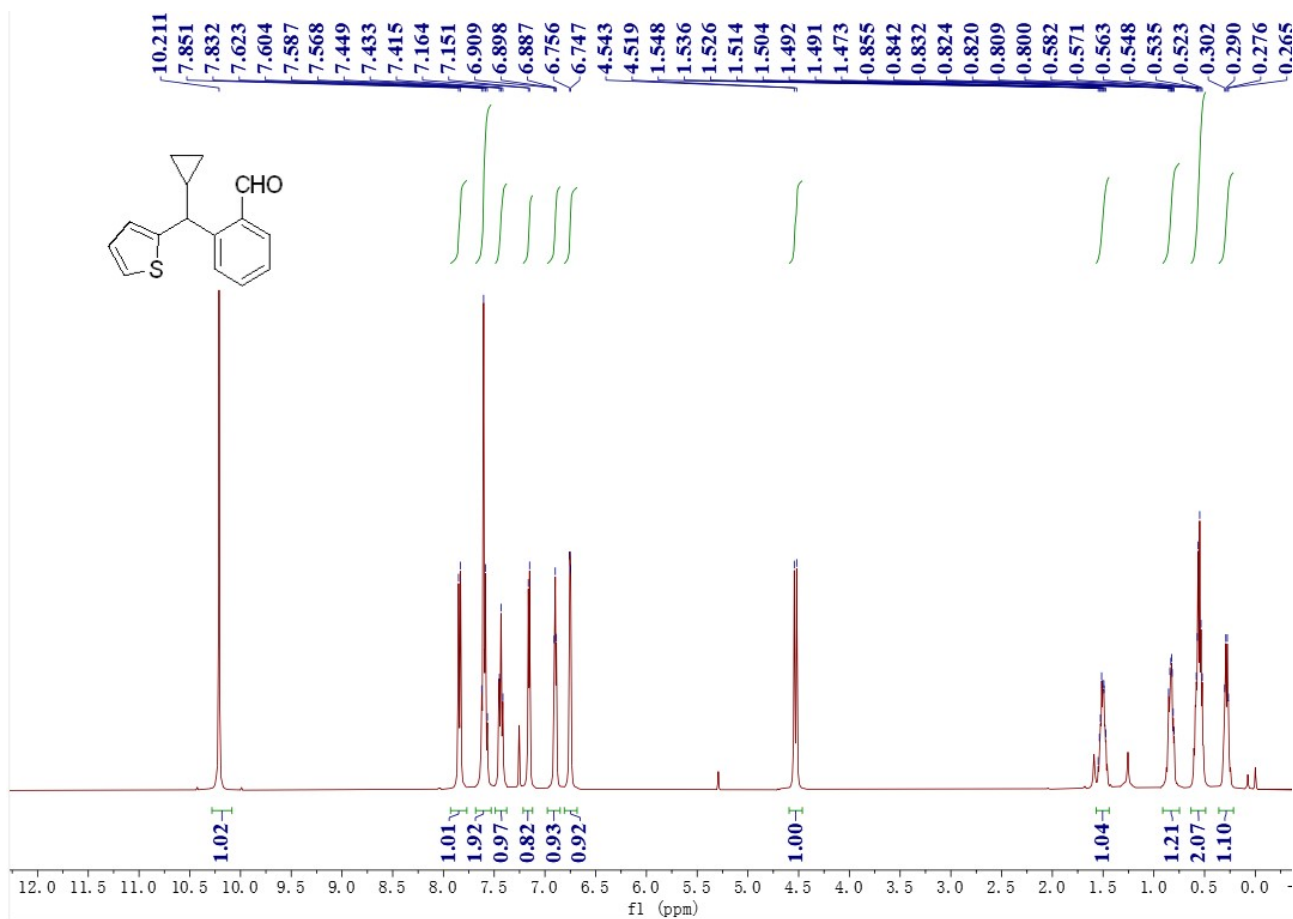

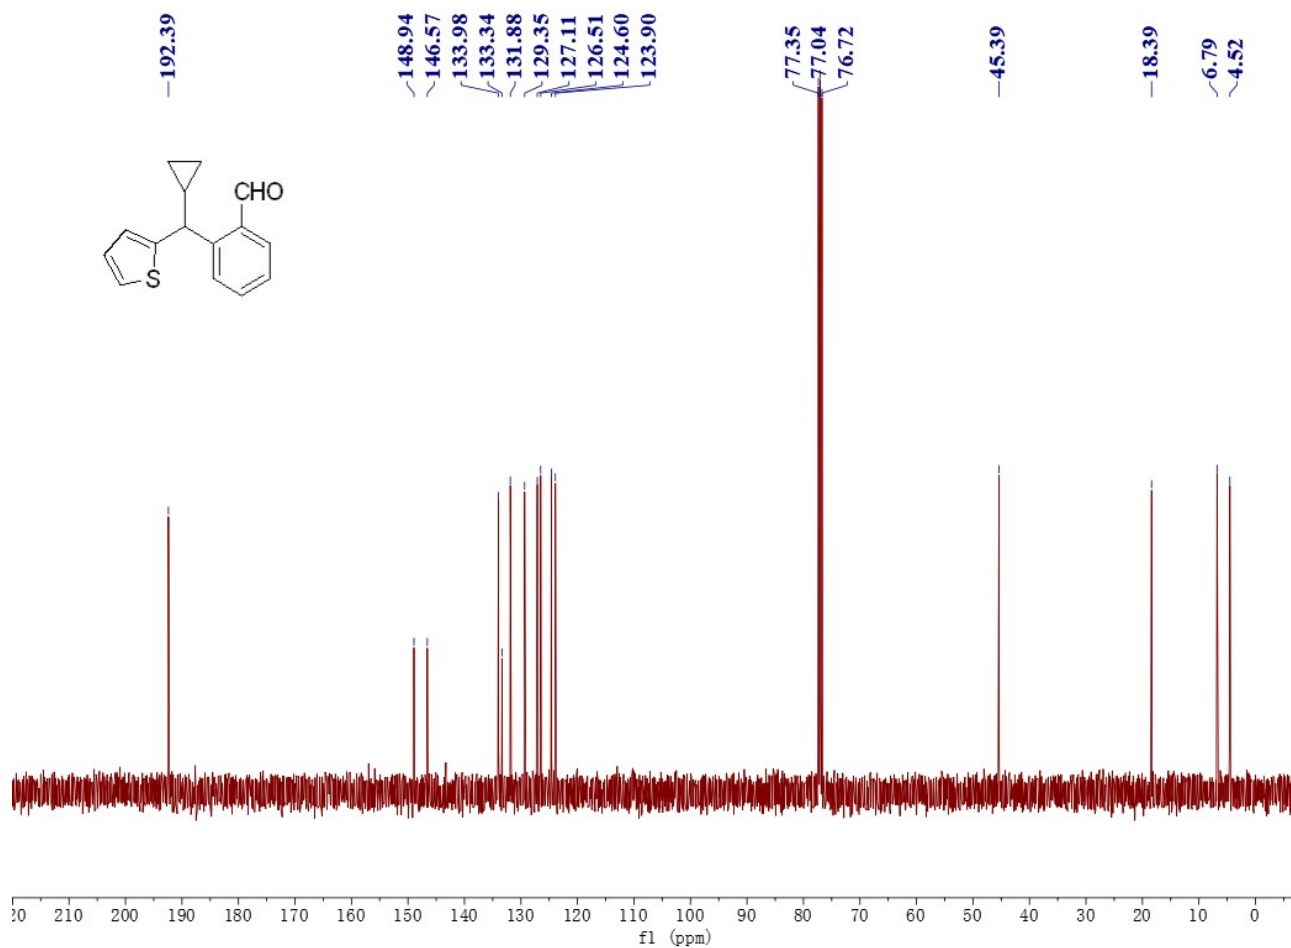

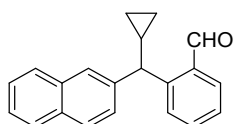

## 2-(cyclopropyl(naphthalen-2-yl)methyl)benzaldehyde (2y)

A colorless oil. 40.1 mg, 70% yield.  $^1\text{H}$  NMR ( $\text{CDCl}_3$ , TMS, 400 MHz)  $\delta$  10.28 (s, 1H), 7.88-7.72 (m, 6H), 7.63 (td,  $J = 7.6, 1.6$  Hz, 1H), 7.51-7.43 (m, 3H), 7.37 (dd,  $J = 8.6, 1.8$  Hz, 1H), 4.58 (d,  $J = 9.4$  Hz, 1H), 1.57-1.48 (m, 1H), 0.85-0.81 (m, 1H), 0.71-0.66 (m, 1H), 0.57-0.51 (m, 1H), 0.39-0.33 (m, 1H).  $^{13}\text{C}$  NMR ( $\text{CDCl}_3$ , TMS, 100 MHz)  $\delta$  192.5, 147.1, 142.2, 133.9, 133.6, 133.4, 132.1, 132.0, 129.7, 127.9, 127.8, 127.6, 127.1, 126.8, 126.3, 126.0, 125.6, 49.6, 17.2, 6.3, 4.8. IR (acetone)  $\nu$  3057, 3001, 2855, 1691, 1507, 1291, 1201, 1019, 750, 661  $\text{cm}^{-1}$ . HRMS (EI) calcd. for  $\text{C}_{21}\text{H}_{18}\text{O}$  ( $\text{M}^+$ ): 286.1352, Found: 286.1345.

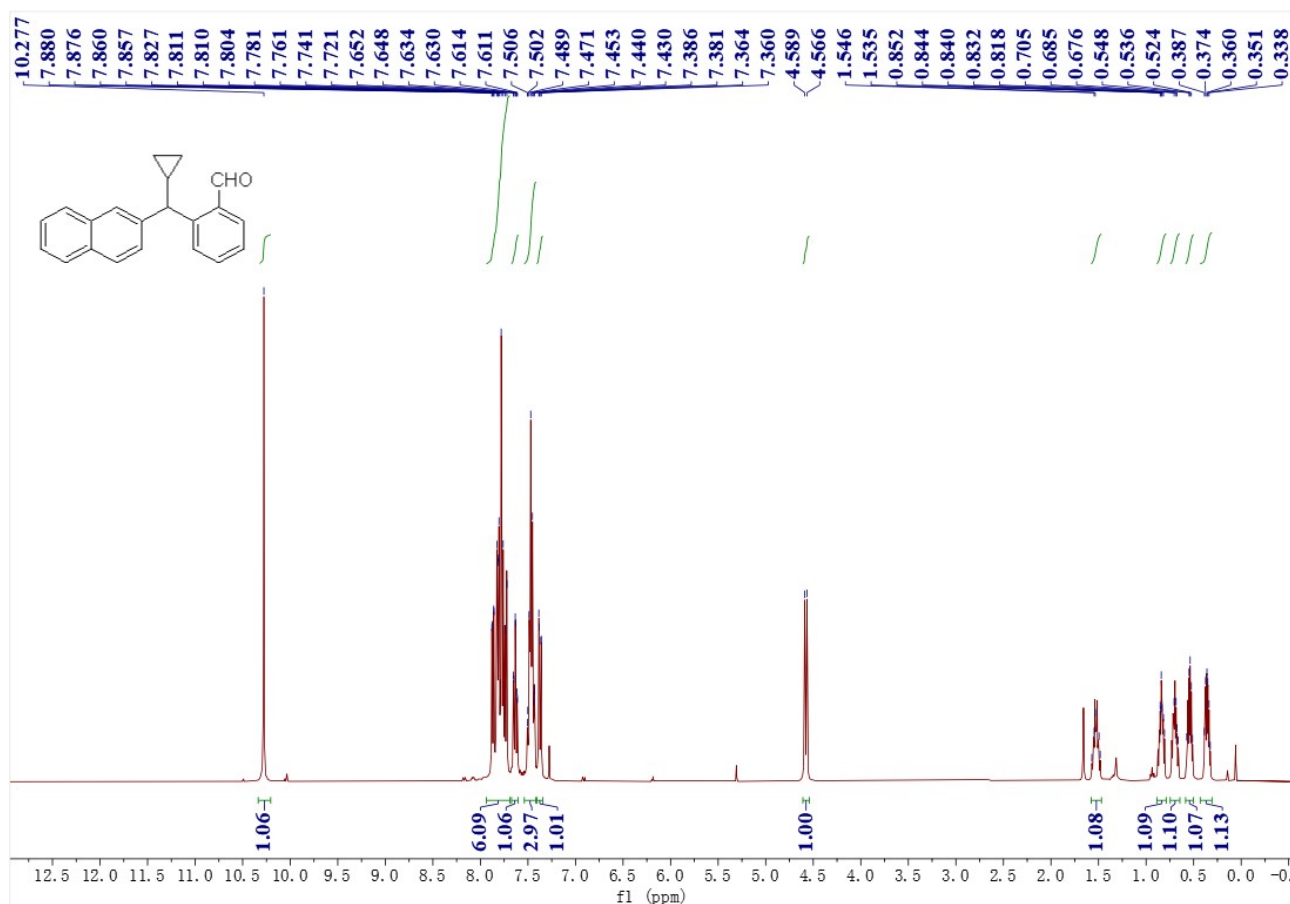



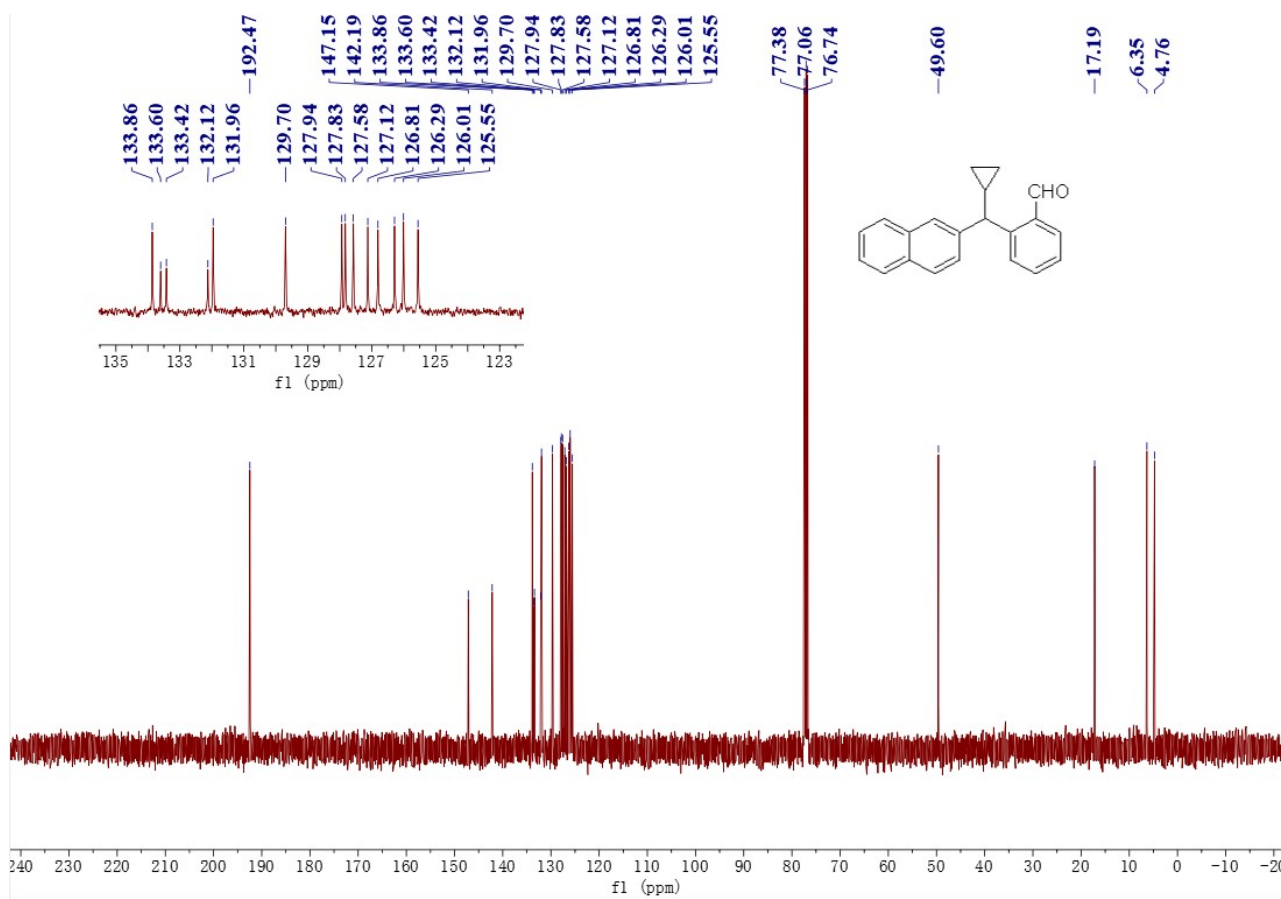

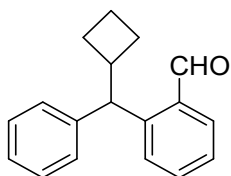

## 2-(cyclobutyl(phenyl)methyl)benzaldehyde (2z)

A colorless oil. 29.5 mg, 59% yield.  $^1\text{H}$  NMR ( $\text{CDCl}_3$ , TMS, 400 MHz)  $\delta$  10.35 (s, 1H), 7.80 (d,  $J = 7.8$  Hz, 1H), 7.55 (t,  $J = 7.8$  Hz, 1H), 7.44 (d,  $J = 7.8$  Hz, 1H), 7.35 (t,  $J = 7.6$  Hz, 1H), 7.24-7.13 (m, 5H), 5.01 (d,  $J = 10.8$  Hz, 1H), 3.12-3.02 (m, 1H), 2.09-1.95 (m, 2H), 1.89-1.81 (m, 3H), 1.69-1.63 (m, 1H).  $^{13}\text{C}$  NMR ( $\text{CDCl}_3$ , TMS, 100 MHz)  $\delta$  192.5, 145.9, 143.2, 134.0, 133.8, 131.8, 128.6, 128.3, 128.2, 126.5, 126.2, 51.3, 40.5, 27.9, 27.3, 17.6. IR (acetone)  $\nu$  3063, 3026, 2856, 1690, 1494, 1290, 1206, 1030, 754, 667  $\text{cm}^{-1}$ . HRMS (EI) calcd. for  $\text{C}_{18}\text{H}_{18}\text{O}$  ( $\text{M}^+$ ): 250.1352, Found: 250.1353.

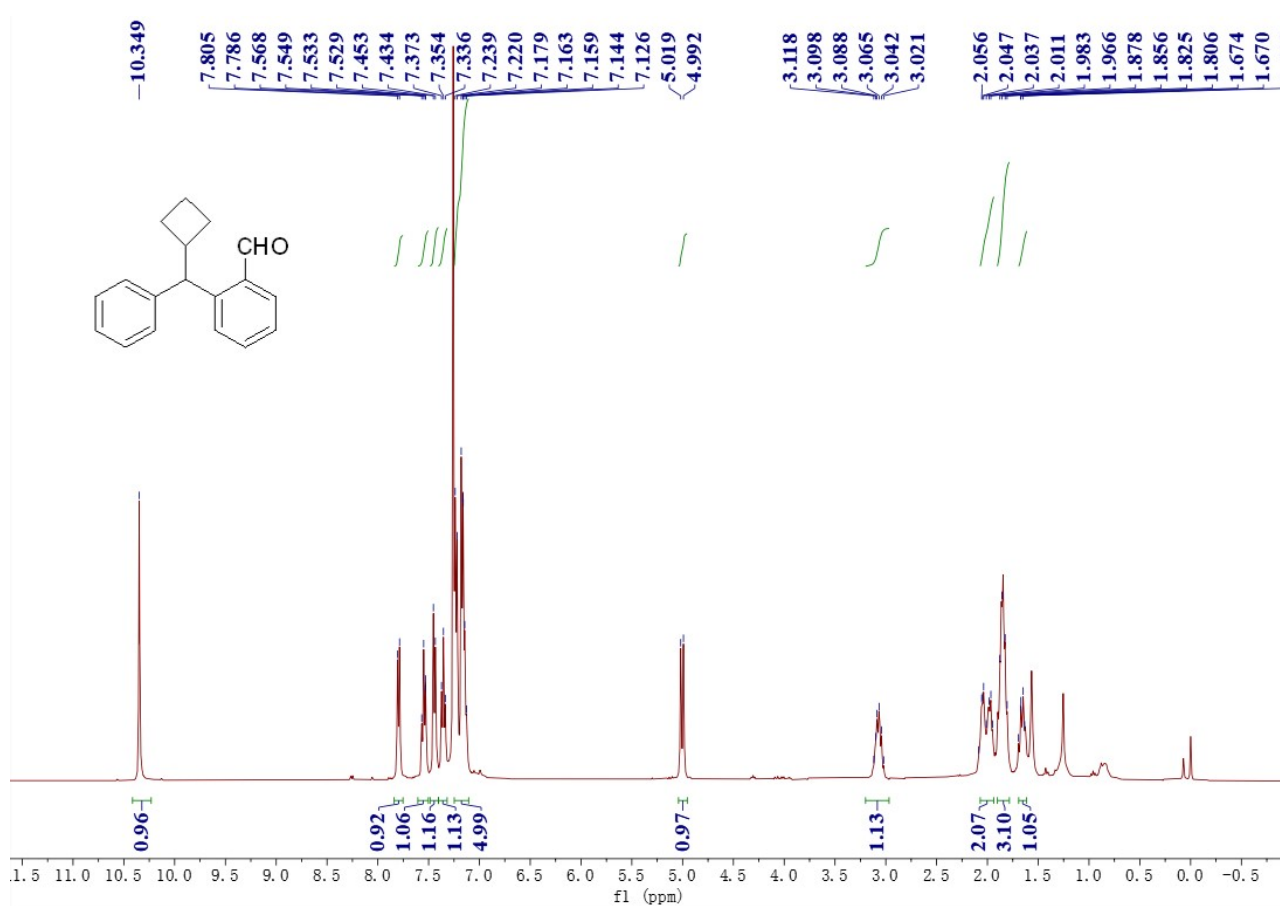

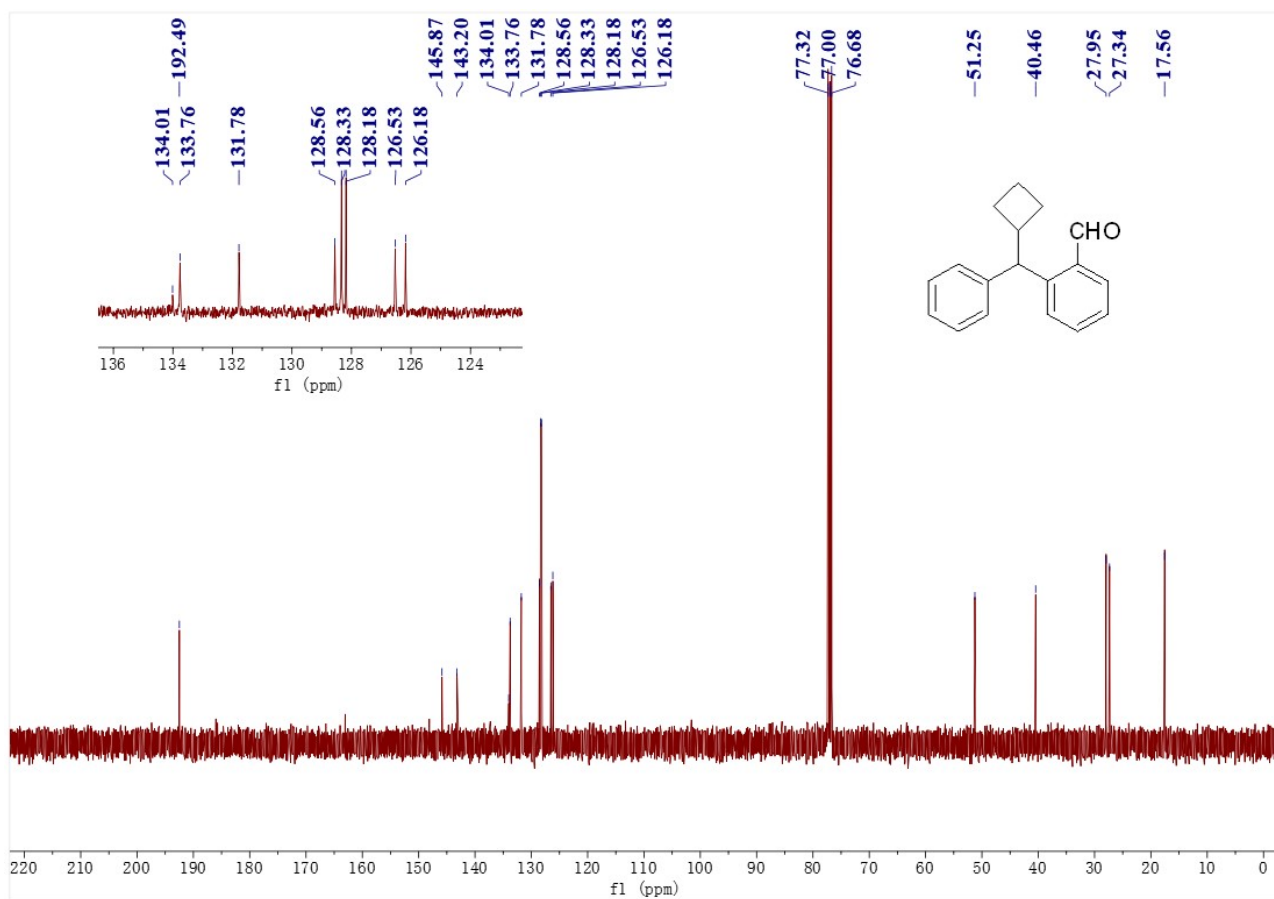

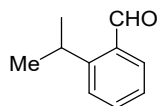

## 2-isopropylbenzaldehyde (2aa)

This is a known compound and its spectroscopic data are consistent with those in the previous literature.<sup>13</sup> CAS number: 6502-22-3. A colorless oil. 10.1 mg, 34% yield. <sup>1</sup>H NMR (CDCl<sub>3</sub>, TMS, 400 MHz) δ 10.37 (s, 1H), 7.82 (dd, *J* = 7.8, 1.6 Hz, 1H), 7.56 (td, *J* = 7.6, 1.6 Hz, 1H), 7.46 (d, *J* = 7.8 Hz, 1H), 7.35 (t, *J* = 7.6 Hz, 1H), 4.02-3.95 (m, 1H), 1.31 (d, *J* = 6.8 Hz, 6H). <sup>13</sup>C NMR (CDCl<sub>3</sub>, TMS, 100 MHz) δ 192.4, 151.4, 134.1, 133.0, 131.5, 126.2, 126.1, 27.7, 23.9.

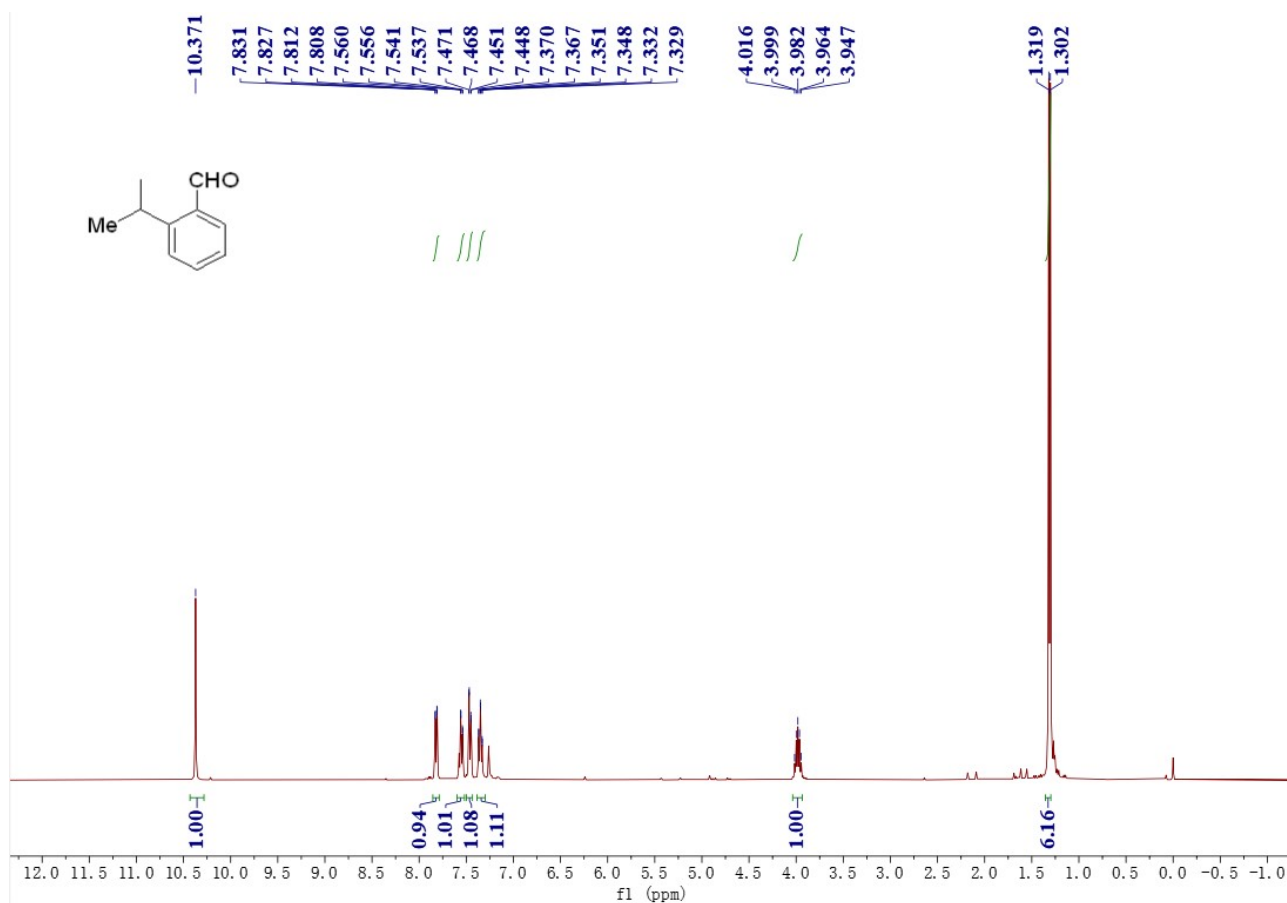

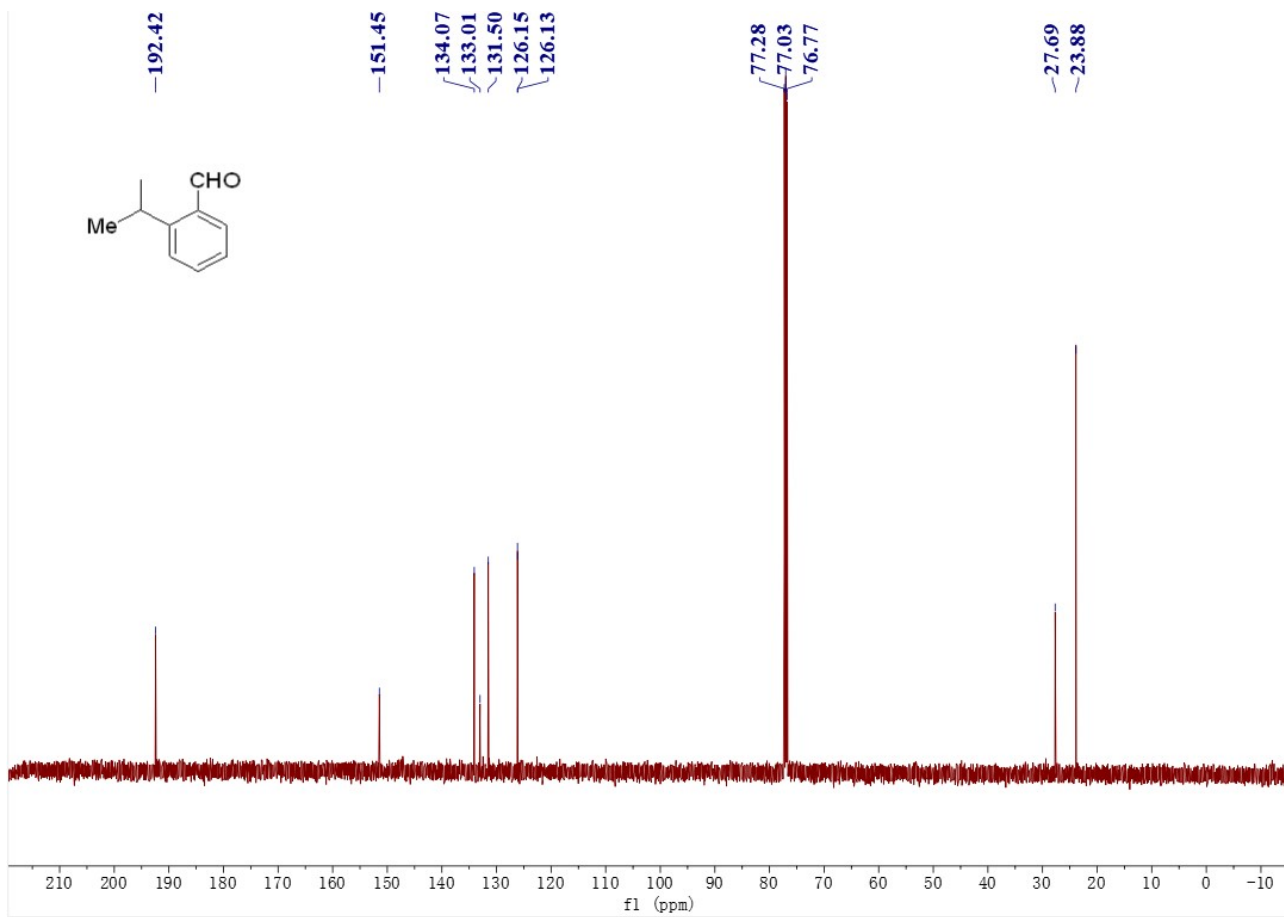

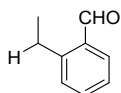

## 2-ethylbenzaldehyde (2ab)

This is a known compound and its spectroscopic data are consistent with those in the previous literature.<sup>14</sup> CAS number: 22927-13-5. A colorless oil. 6.5 mg, 24% yield. <sup>1</sup>H NMR (CDCl<sub>3</sub>, TMS, 400 MHz) δ 10.29 (s, 1H), 7.83 (dd, *J* = 7.6, 1.6 Hz, 1H), 7.54-7.48 (m, 1H), 7.48-7.34 (m, 1H), 7.30 (d, *J* = 7.6 Hz, 1H), 3.07 (q, *J* = 7.6 Hz, 2H), 1.27 (t, *J* = 7.6 Hz, 3H). <sup>13</sup>C NMR (CDCl<sub>3</sub>, TMS, 100 MHz) δ 192.4, 147.1, 133.9, 133.5, 131.7, 130.2, 126.3, 25.7, 16.3.

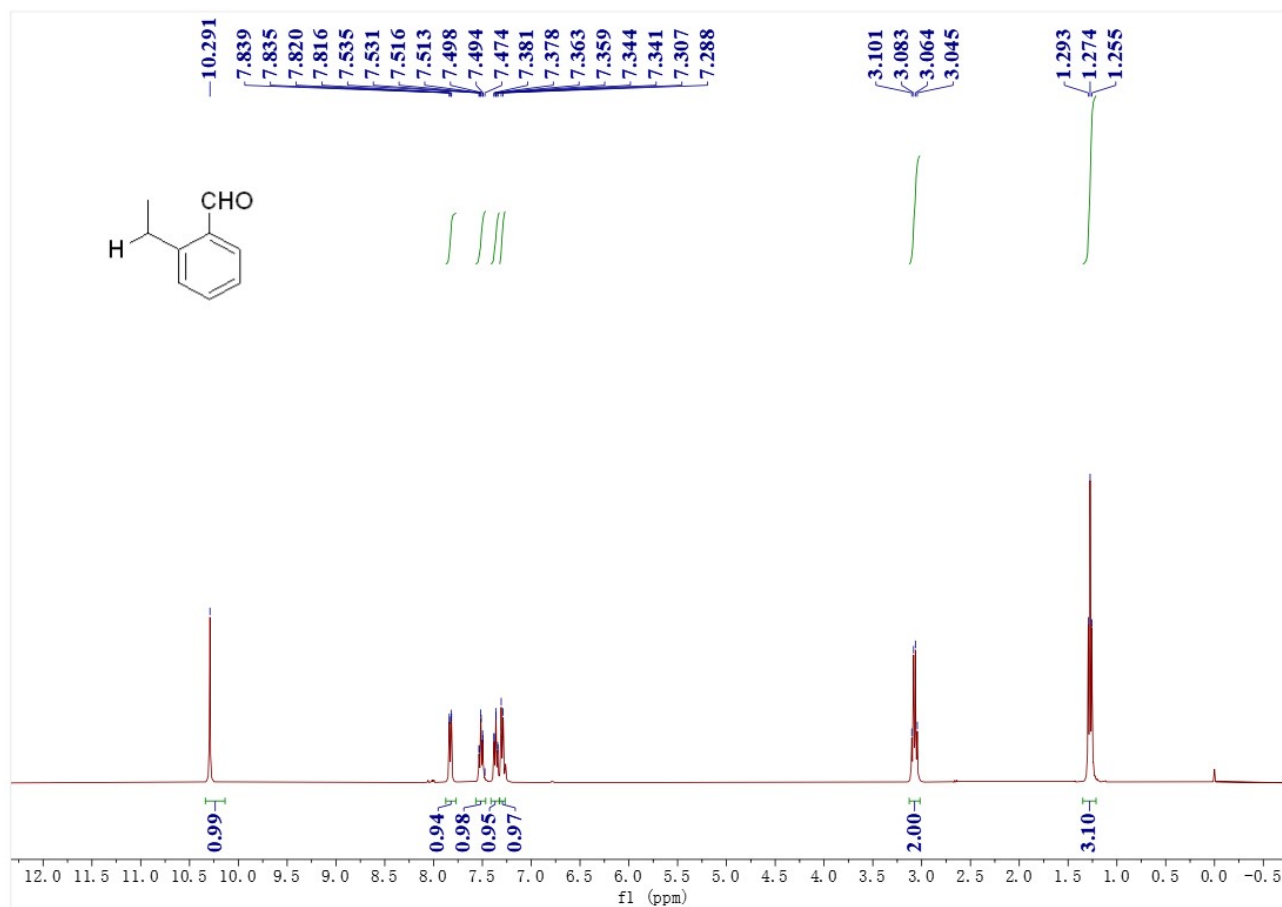

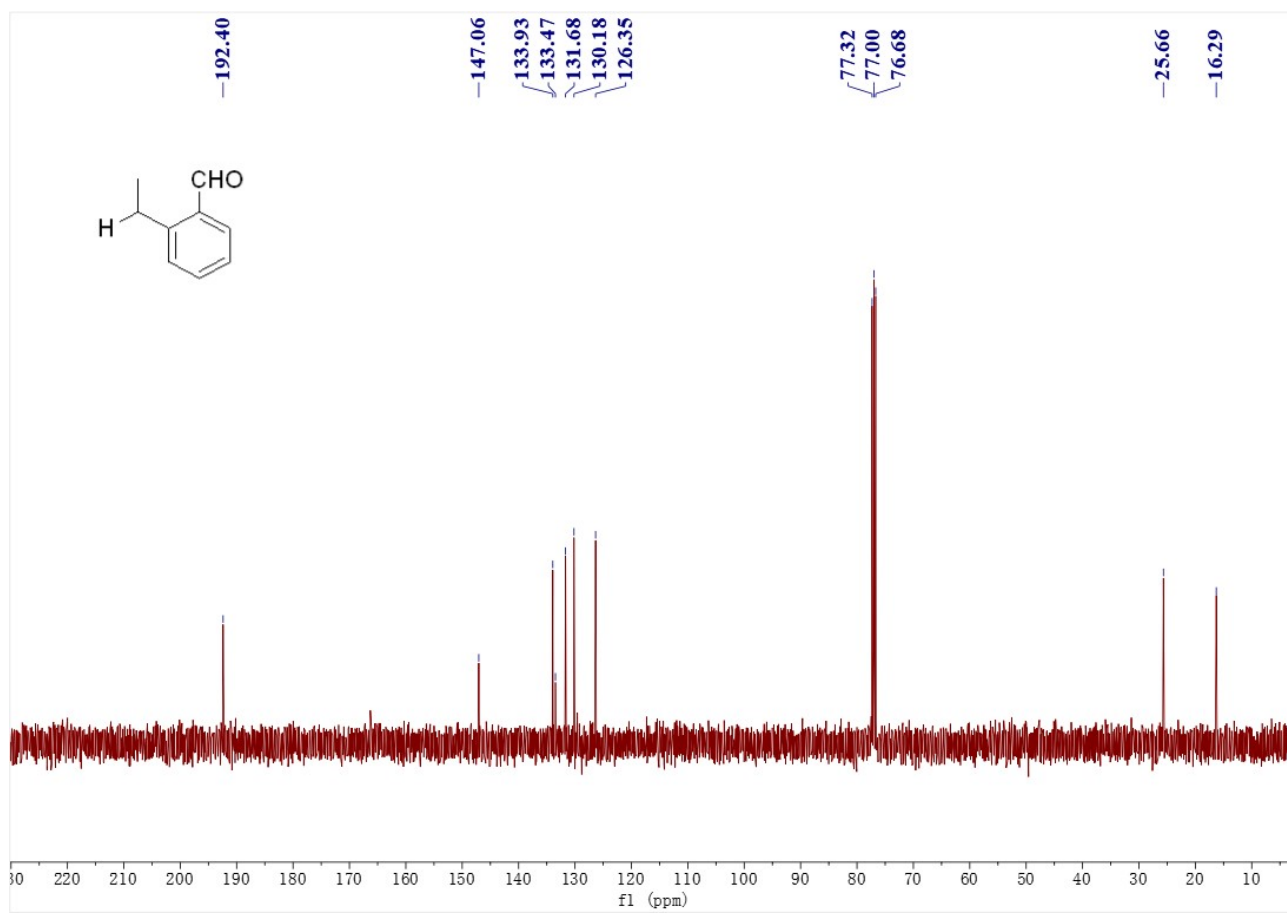

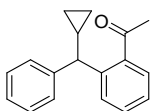

### 1-(2-(cyclopropyl(phenyl)methyl)phenyl)ethan-1-one (2ac)

A colorless oil. 30.0 mg, 60% yield.  $^1\text{H}$  NMR ( $\text{CDCl}_3$ , TMS, 400 MHz)  $\delta$  7.67 (d,  $J = 8.0$  Hz, 1H), 7.46-7.42 (m, 2H), 7.28-7.22 (m, 4H), 7.18-7.13 (m, 3H), 3.97 (d,  $J = 9.8$  Hz, 1H), 2.20 (s, 3H), 1.36-1.20 (m, 1H), 0.70-0.60 (m, 2H), 0.38-0.33 (m, 1H), 0.30-0.25 (m, 1H).  $^{13}\text{C}$  NMR ( $\text{CDCl}_3$ , TMS, 100 MHz)  $\delta$  204.1, 145.1, 143.8, 139.8, 130.6, 129.2, 128.7, 128.1, 127.4, 125.9, 125.7, 50.3, 30.2, 17.0, 5.9, 5.1. IR (acetone)  $\nu$  3063, 3025, 2857, 1692, 1492, 1252, 1072, 1019, 738, 700  $\text{cm}^{-1}$ . HRMS (EI) calcd. for  $\text{C}_{18}\text{H}_{18}\text{O}$  ( $\text{M}^+$ ): 250.1352, Found: 250.1353.

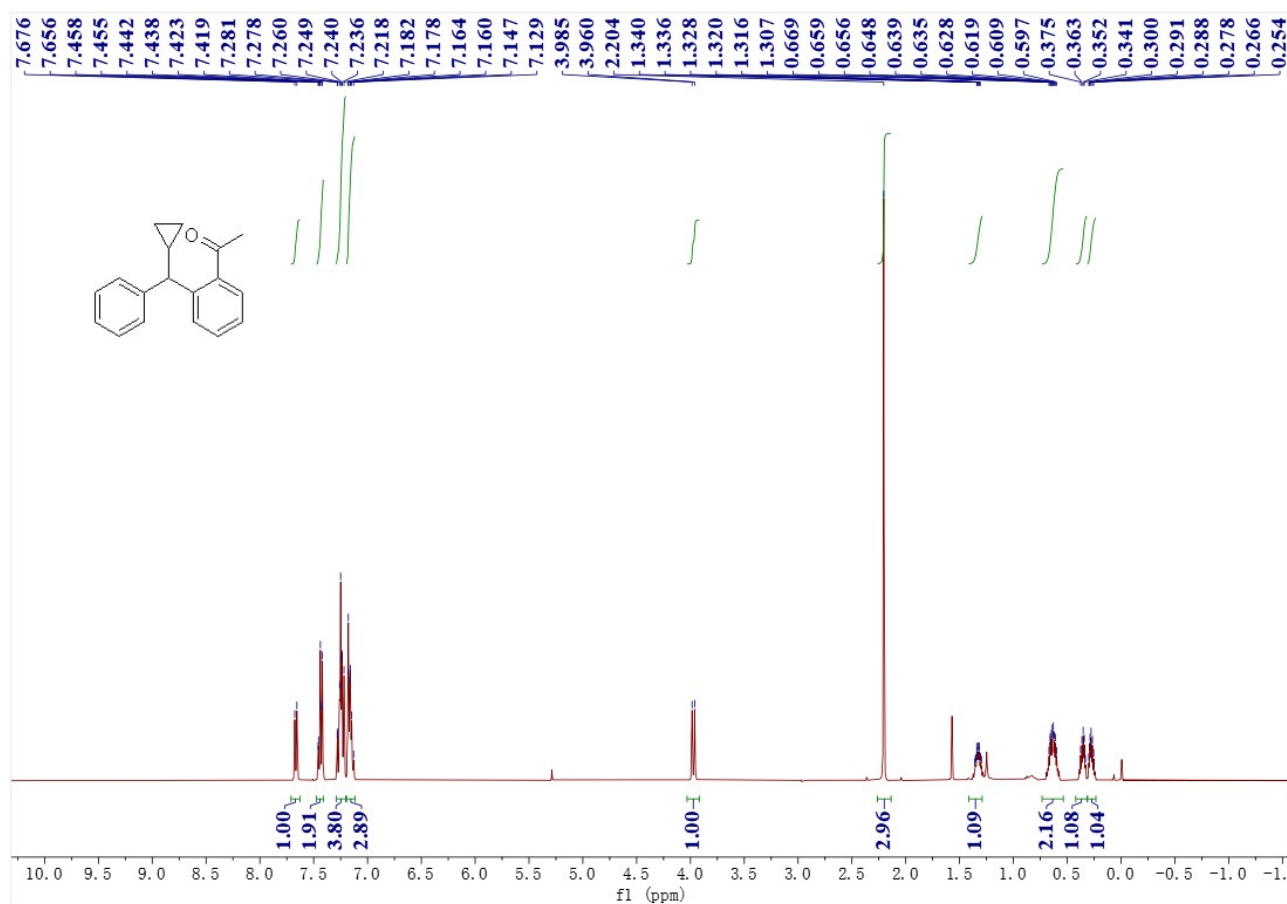



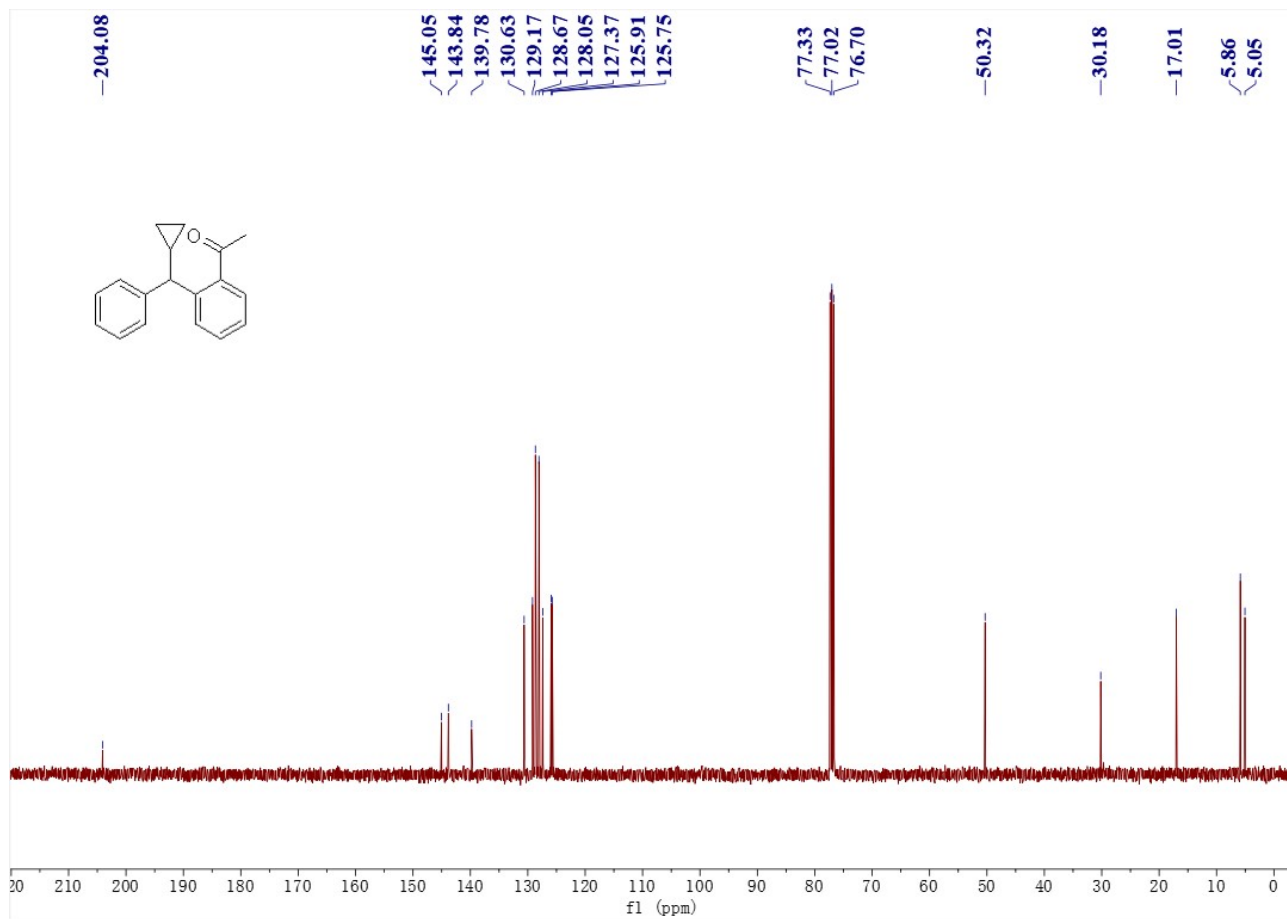

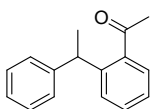

### 1-(2-(1-phenylethyl)phenyl)ethan-1-one (2ad)

This is a known compound and its spectroscopic data are consistent with those in the previous literature.<sup>15</sup> CAS number: 161467-47-6. A colorless oil. 36.3 mg, 81% yield. <sup>1</sup>H NMR (CDCl<sub>3</sub>, TMS, 400 MHz) δ 7.46 (dd, *J* = 7.8, 1.4 Hz, 1H), 7.40-7.31 (m, 2H), 7.25-7.21 (m, 3H), 7.16-7.13 (m, 3H), 4.86 (q, *J* = 7.2 Hz, 1H), 2.35 (s, 3H), 1.60 (d, *J* = 7.2 Hz, 3H). <sup>13</sup>C NMR (CDCl<sub>3</sub>, TMS, 100 MHz) δ 203.8, 146.2, 145.1, 139.3, 130.9, 128.4, 128.2, 128.0, 127.6, 125.9, 125.7, 39.5, 30.3, 22.0.

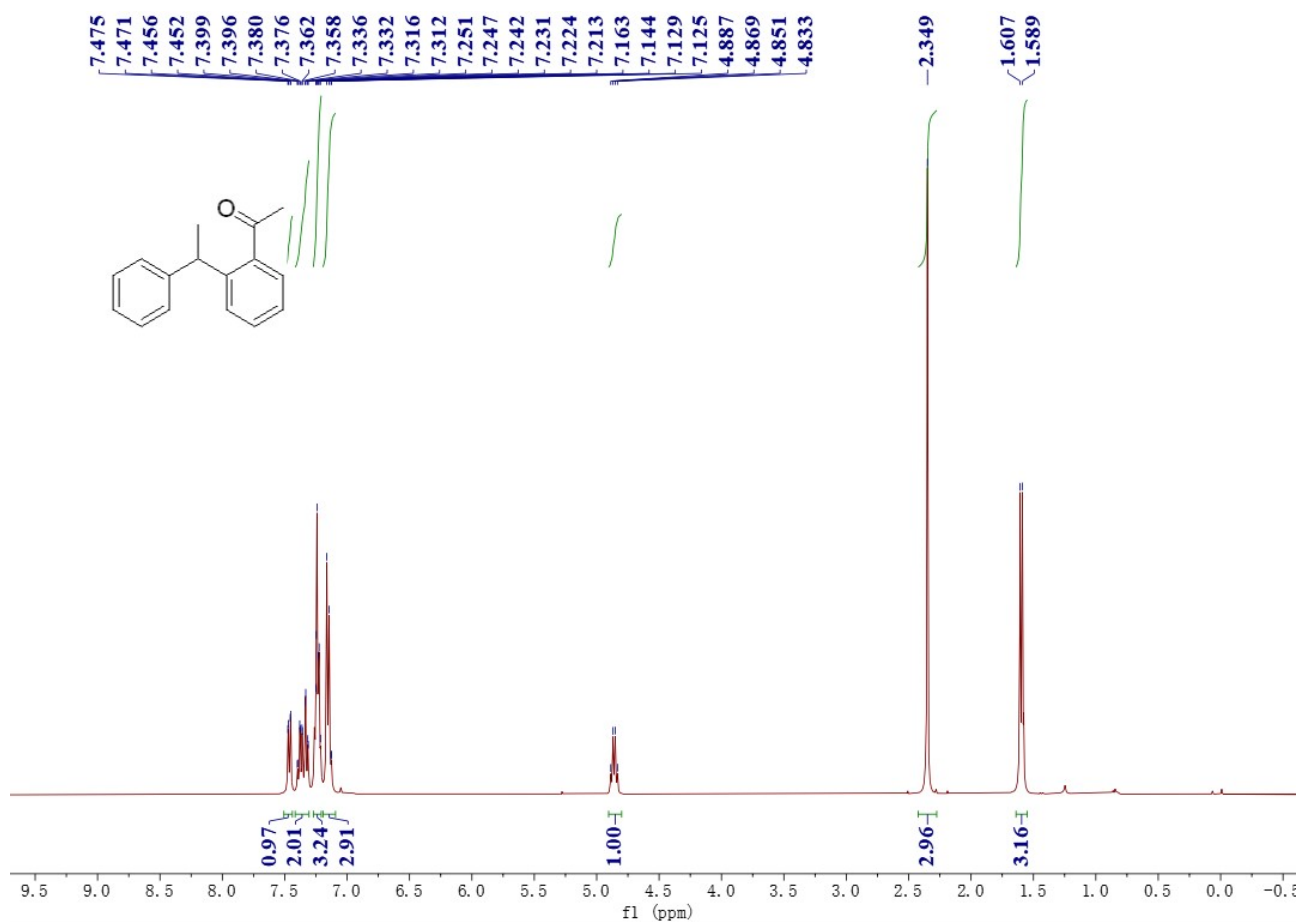

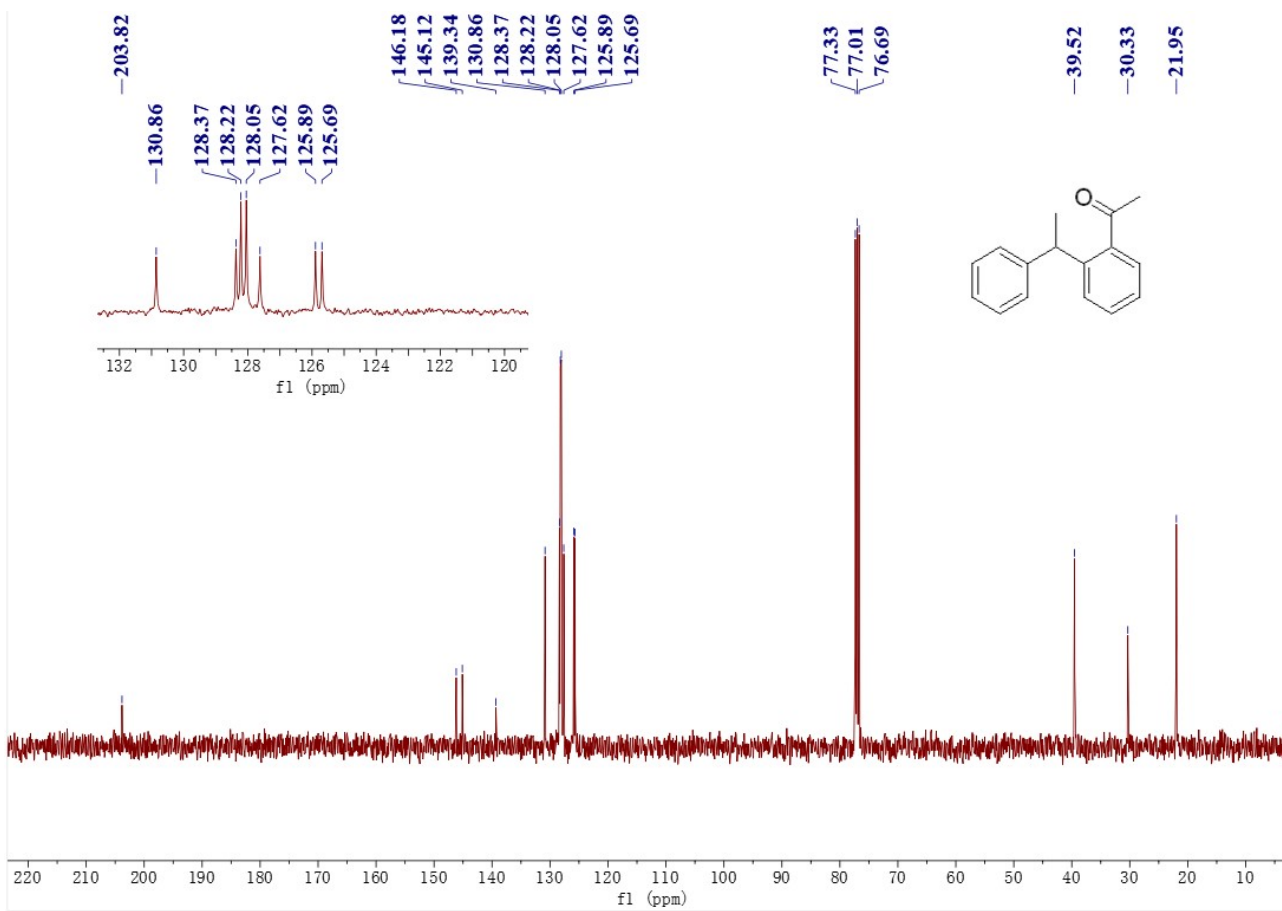

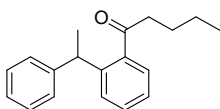

### 1-(2-(1-phenylethyl)phenyl)pentan-1-one (2ae)

This is a known compound and its spectroscopic data are consistent with those in the previous literature.<sup>16</sup> CAS number: 854660-28-9. A colorless oil. 42.1 mg, 79% yield. <sup>1</sup>H NMR (CDCl<sub>3</sub>, TMS, 400 MHz) δ 7.39-7.32 (m, 3H), 7.26-7.20 (m, 4H), 7.15-7.12 (m, 3H), 4.73 (q, *J* = 7.2 Hz, 1H), 2.76-2.68 (m, 1H), 2.51-2.43 (m, 1H), 1.60 (d, *J* = 7.2 Hz, 3H), 1.55-1.48 (m, 2H), 1.31-1.22 (m, 3H), 0.86 (t, *J* = 7.4 Hz, 3H). <sup>13</sup>C NMR (CDCl<sub>3</sub>, TMS, 100 MHz) δ 206.9, 146.2, 144.6, 140.2, 130.4, 128.2, 128.2, 128.1, 126.9, 125.9, 125.7, 77.4, 42.5, 39.7, 26.1, 22.3, 22.1, 13.9.

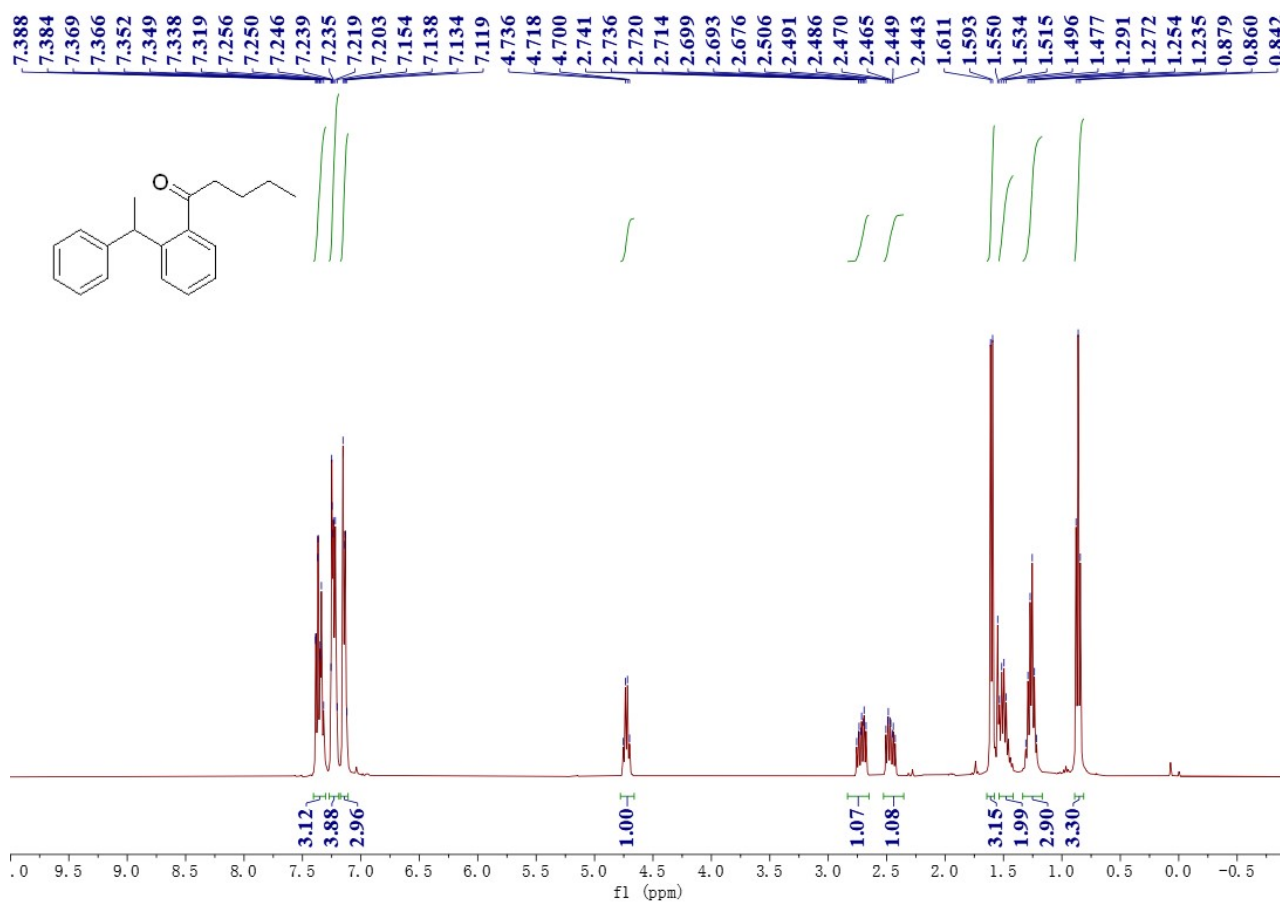

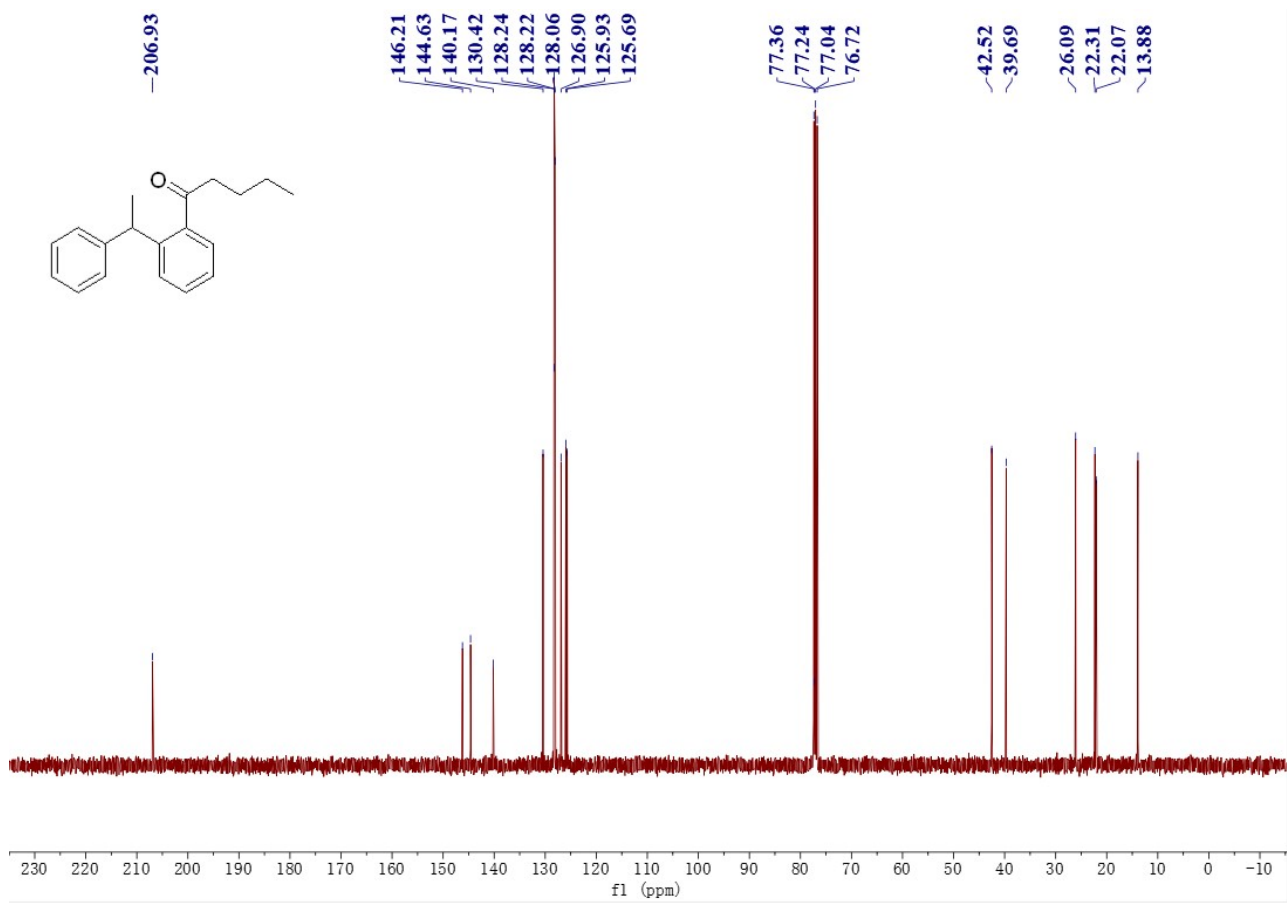

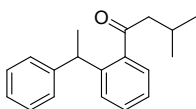

### 3-methyl-1-(2-(1-phenylethyl)phenyl)butan-1-one (2af)

A colorless oil. 39.9 mg, 75% yield.  $^1\text{H}$  NMR ( $\text{CDCl}_3$ , TMS, 400 MHz)  $\delta$  7.40 (dd,  $J = 7.8, 1.6$  Hz, 1H), 7.35 (dd,  $J = 7.2, 1.4$  Hz, 1H), 7.31 (dd,  $J = 8.0, 1.4$  Hz, 1H), 7.27-7.21 (m, 3H), 7.18-7.13 (m, 3H), 4.75 (q,  $J = 7.2$  Hz, 1H), 2.65 (dd,  $J = 16.8, 7.2$  Hz, 1H), 2.41 (dd,  $J = 16.8, 6.6$  Hz, 1H), 2.20-2.12 (m, 1H), 1.61 (d,  $J = 7.2$  Hz, 3H), 0.93 (d,  $J = 6.8$  Hz, 3H), 0.87 (d,  $J = 6.6$  Hz, 3H).  $^{13}\text{C}$  NMR ( $\text{CDCl}_3$ , TMS, 100 MHz)  $\delta$  206.2, 146.2, 144.9, 140.1, 130.5, 128.5, 128.3, 128.0, 127.1, 125.9, 125.7, 51.7, 39.6, 24.6, 22.64, 22.61, 22.1. IR (acetone)  $\nu$  30631 2954, 2869, 1685, 1493, 1260, 1057, 1011, 998, 754  $\text{cm}^{-1}$ . HRMS (EI) calcd. for  $\text{C}_{19}\text{H}_{22}\text{O}$  ( $\text{M}^+$ ): 266.1665, Found: 266.1668.

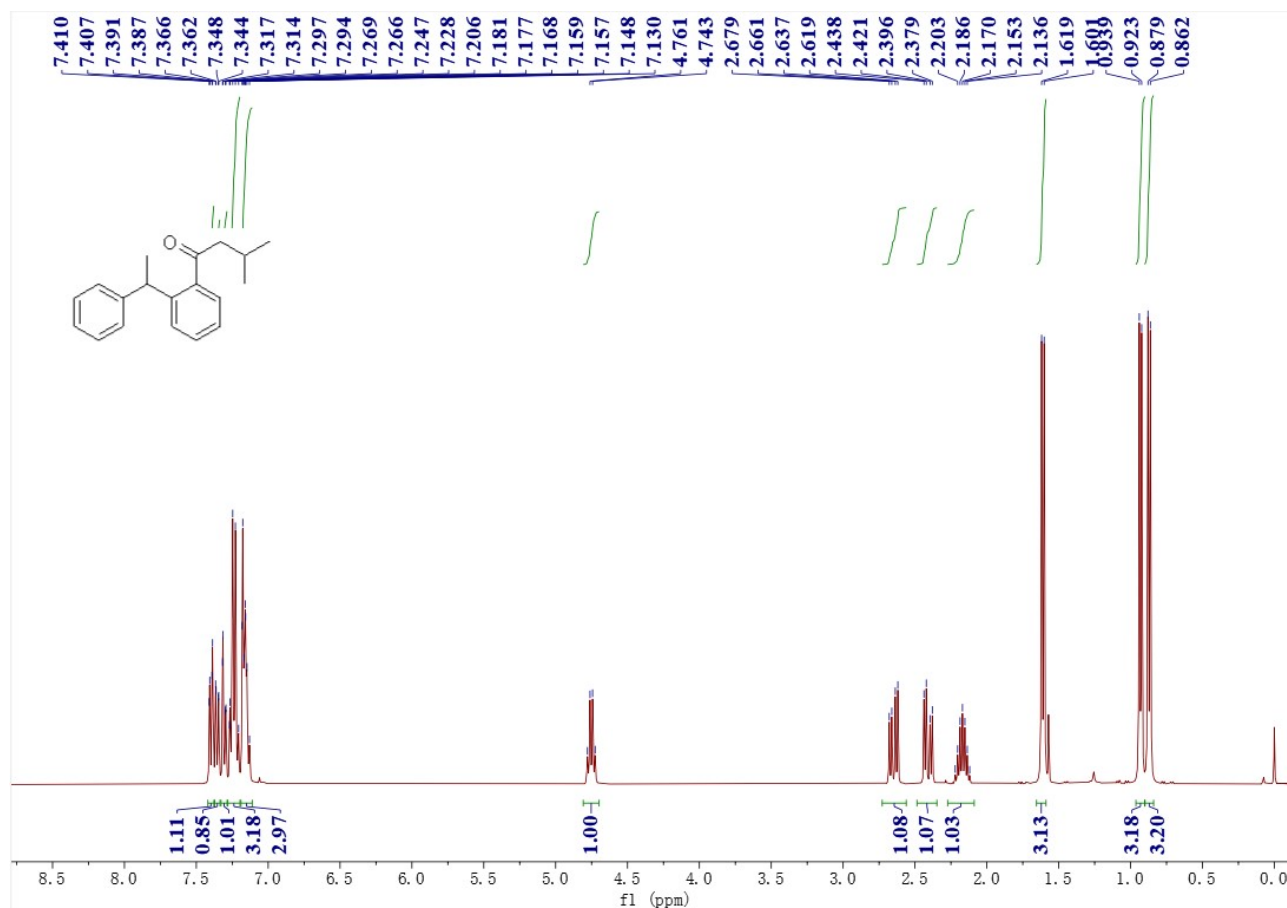

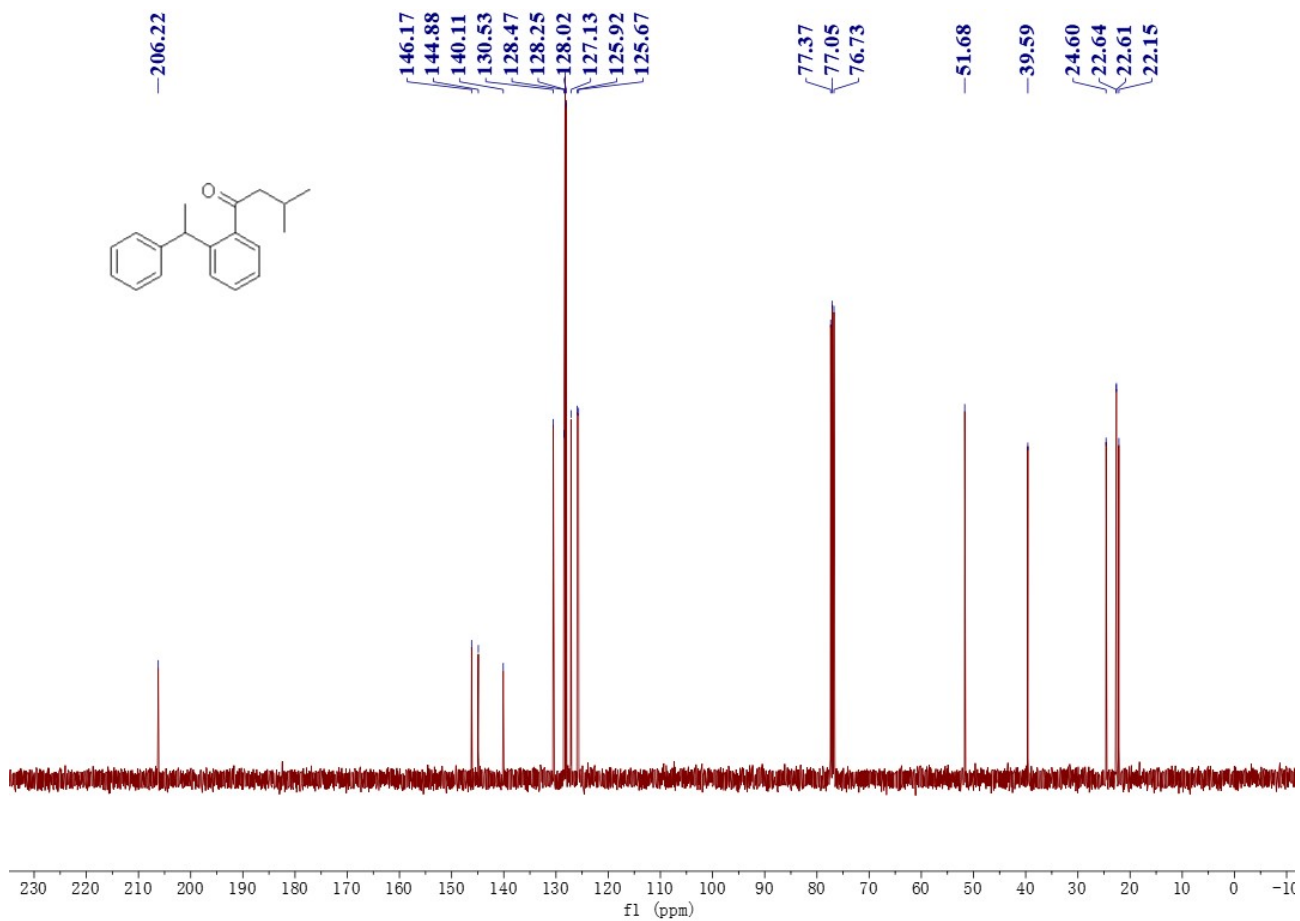

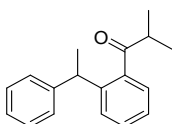

### 2-methyl-1-(2-(1-phenylethyl)phenyl)propan-1-one (2ag)

This is a known compound and its spectroscopic data are consistent with those in the previous literature.<sup>17</sup> CAS number: 1620210-43-6. A colorless oil. 36.3 mg, 72% yield. <sup>1</sup>H NMR (CDCl<sub>3</sub>, TMS, 400 MHz) δ 7.41-7.30 (m, 3H), 7.25-7.14 (m, 6H), 4.64 (q, *J* = 7.2 Hz, 1H), 3.25-3.18 (m, 1H), 1.61 (d, *J* = 7.2 Hz, 3H), 1.27-1.22 (m, 1H), 1.15 (d, *J* = 6.8 Hz, 3H), 0.91 (d, *J* = 7.2 Hz, 3H). <sup>13</sup>C NMR (CDCl<sub>3</sub>, TMS, 100 MHz) δ 210.2, 146.1, 145.4, 139.3, 130.5, 128.5, 128.2, 128.0, 126.8, 126.0, 125.6, 39.7, 39.6, 22.3, 18.3, 18.3.

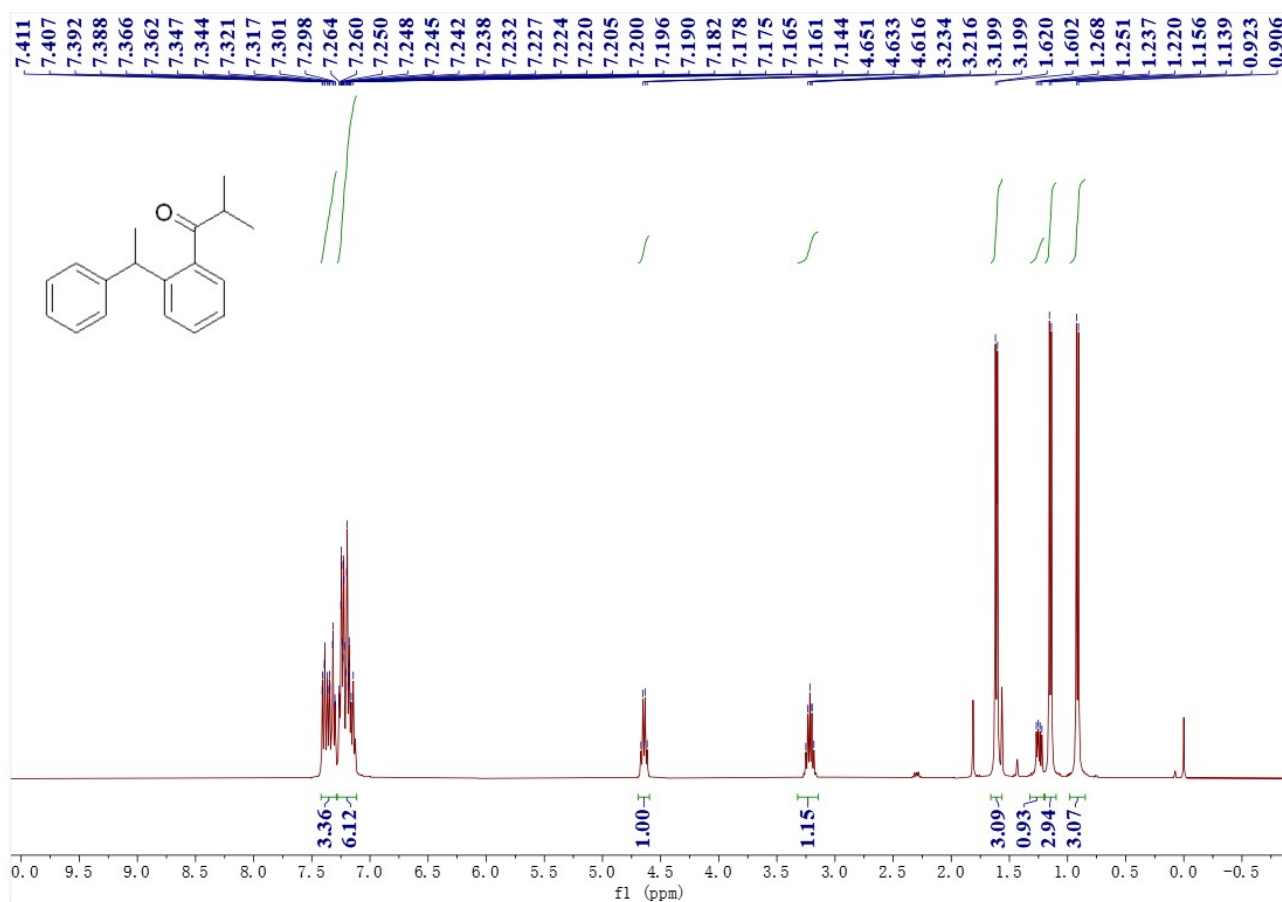



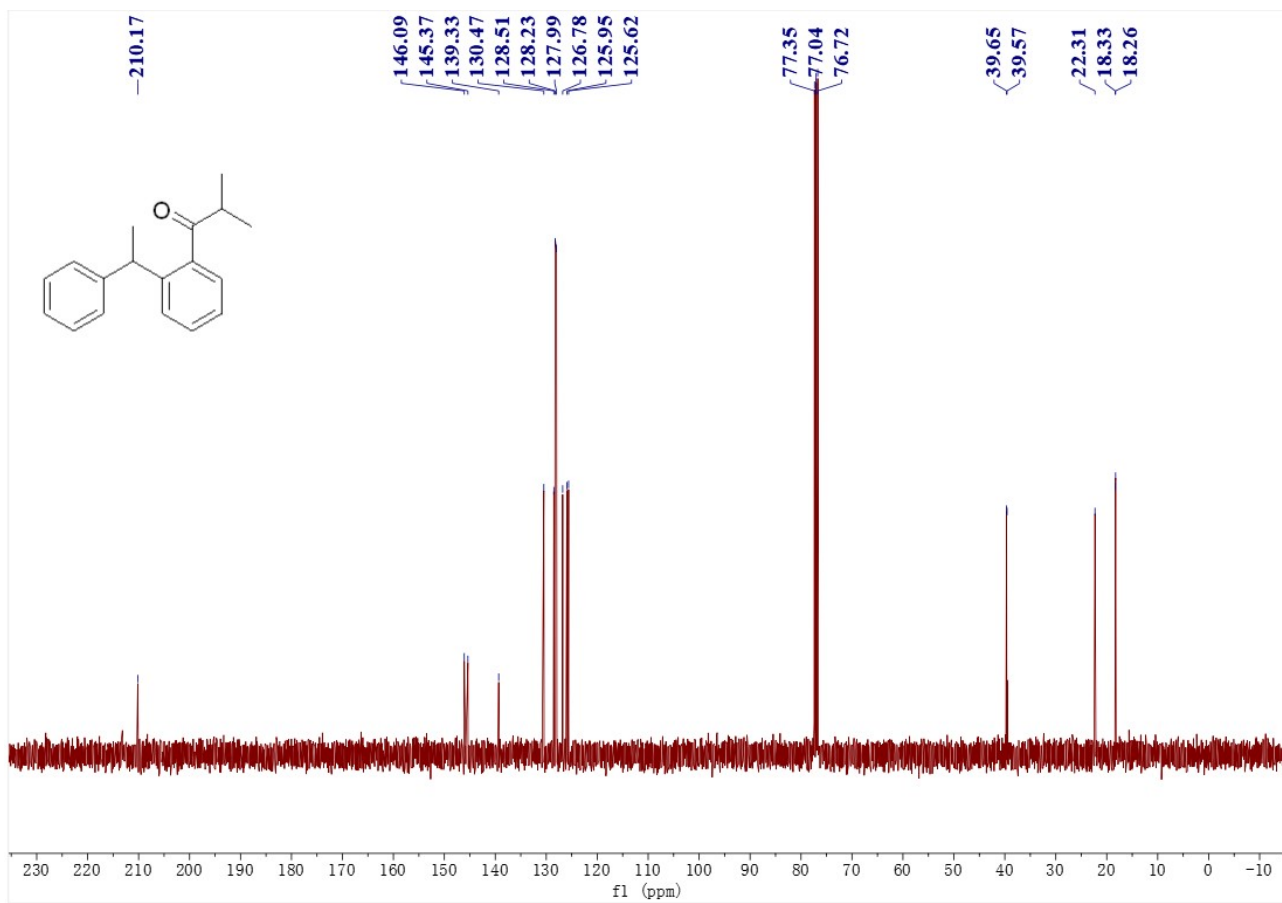

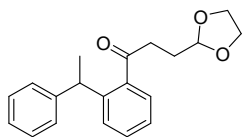

### 2-methyl-1-(2-(1-phenylethyl)phenyl)propan-1-one (2ah)

A colorless oil. 43.5 mg, 70% yield.  $^1\text{H}$  NMR ( $\text{CDCl}_3$ , TMS, 400 MHz)  $\delta$  7.43 (dd,  $J = 7.8, 1.4$  Hz, 1H), 7.40-7.31 (m, 2H), 7.26-7.21 (m, 3H), 7.16-7.13 (m, 3H), 4.87 (t,  $J = 4.4$  Hz, 1H), 4.75 (q,  $J = 7.2$  Hz, 1H), 3.92-3.89 (m, 2H), 3.85-3.79 (m, 2H), 2.89-2.85 (m, 1H), 2.64-2.60 (m, 1H), 2.04-1.87 (m, 2H), 1.60 (d,  $J = 7.2$  Hz, 3H).  $^{13}\text{C}$  NMR ( $\text{CDCl}_3$ , TMS, 100 MHz)  $\delta$  205.4, 146.2, 144.9, 139.7, 130.6, 128.3, 128.2, 128.1, 127.1, 125.9, 125.7, 103.4, 65.0, 39.6, 36.6, 27.8, 22.0. IR (acetone)  $\nu$  3060, 3025, 2966, 1690, 1493, 1408, 1139, 1026, 785, 701  $\text{cm}^{-1}$ . HRMS (EI) calcd. for  $\text{C}_{20}\text{H}_{22}\text{O}_3$  ( $\text{M}^+$ ): 310.1563, Found: 310.1568.

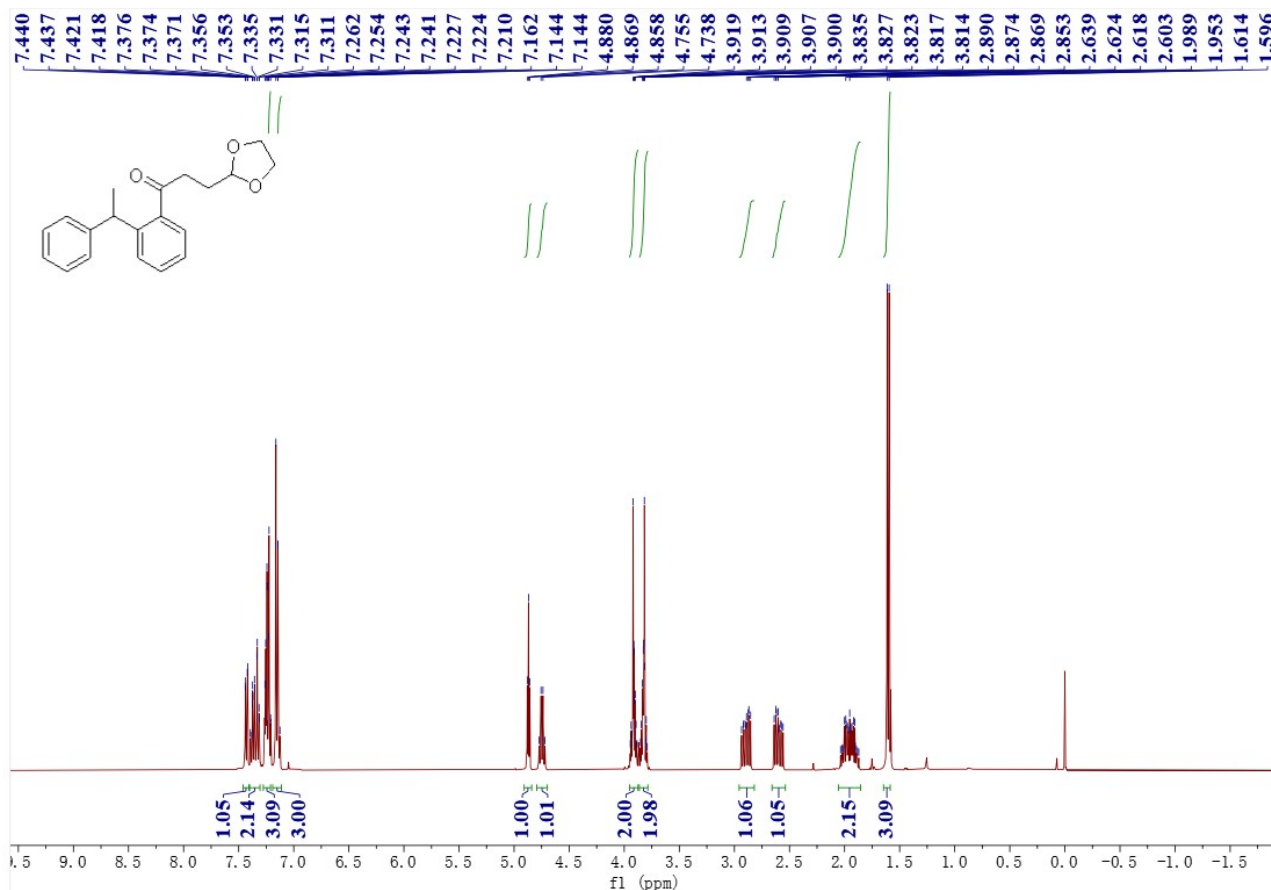

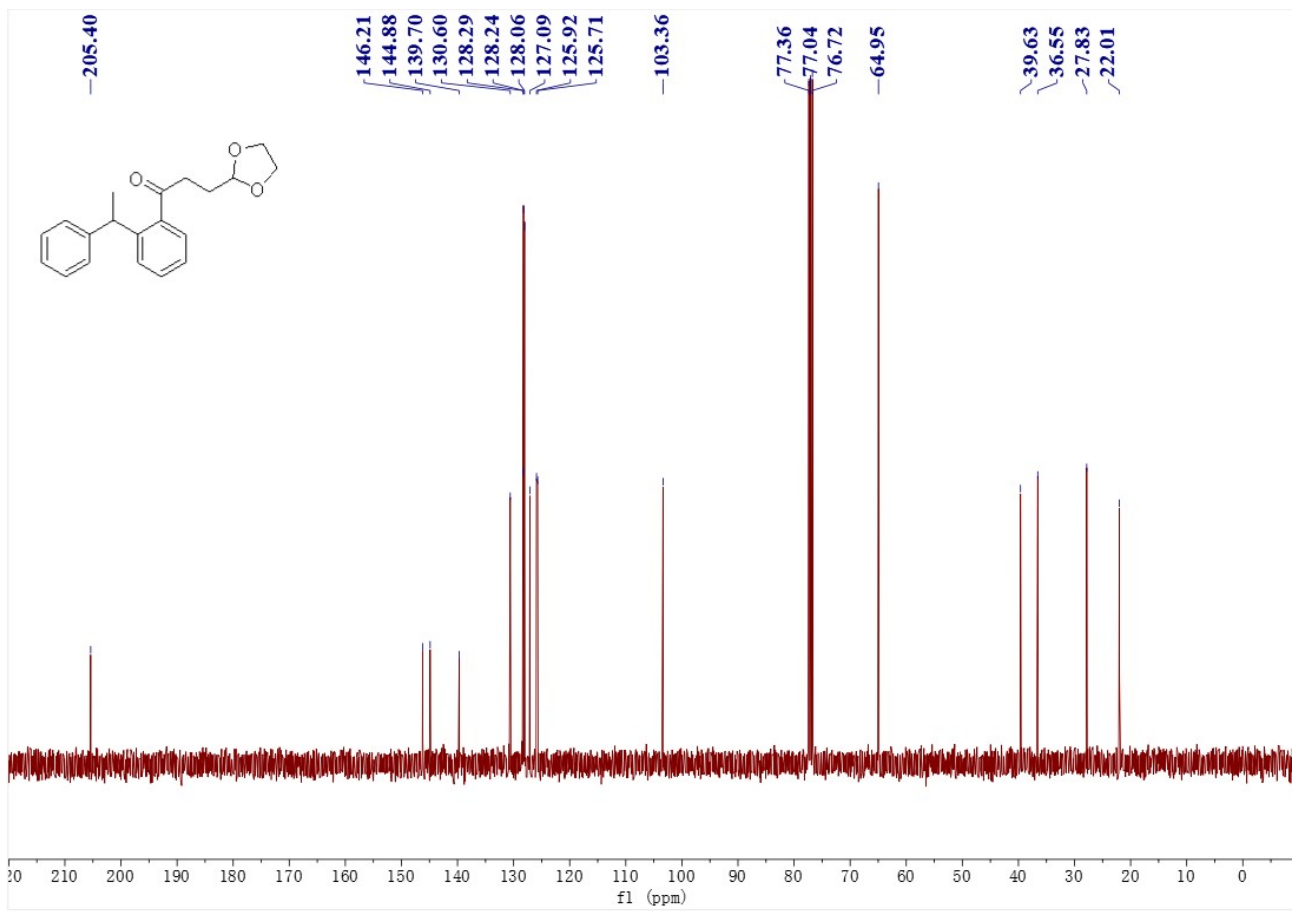

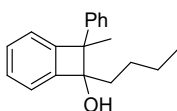

### 7-butyl-8-methyl-8-phenylbicyclo[4.2.0]octa-1,3,5-trien-7-ol (3 and 3')

A colorless oil. 27.6 mg, 51% yield, *d.r.* = 3 : 2.  $^1\text{H}$  NMR ( $\text{CDCl}_3$ , TMS, 400 MHz)  $\delta$  7.43-7.27 (m, 5H), 7.26-7.20 (m, 4H), 2.03-1.88 (m, 2H), 1.84-1.67 (m, 4H), 1.73-1.57 (m, 1H), 1.57-1.51 (m, 1H), 1.47-1.34 (m, 2H), 0.97 (t,  $J = 7.4$  Hz, 3H).  $^{13}\text{C}$  NMR ( $\text{CDCl}_3$ , TMS, 125 MHz)  $\delta$  149.0, 148.3, 143.7, 129.5, 128.5, 128.1, 127.7, 126.8, 123.2, 122.8, 84.7, 63.2, 35.5, 26.8, 23.8, 23.4, 14.2. IR (acetone)  $\nu$  3465, 3027, 2957, 2871, 1489, 1447, 1397, 1092, 934, 698  $\text{cm}^{-1}$ . HRMS (EI) calcd. for  $\text{C}_{19}\text{H}_{22}\text{O}$  ( $\text{M}^+$ ): 266.1665, Found: 266.1666.

$^1\text{H}$  NMR ( $\text{CDCl}_3$ , TMS, 400 MHz)  $\delta$  7.48-7.15 (m, 9H), 2.40 (s, 1H), 1.71 (s, 3H), 1.65-1.53 (m, 1H), 1.47-1.34 (m, 2H), 1.20-0.92 (m, 3H), 0.76 (t,  $J = 7.3$  Hz, 3H).  $^{13}\text{C}$  NMR (125 MHz,  $\text{CDCl}_3$ )  $\delta$  149.1, 148.7, 143.7, 129.4, 128.1, 127.8, 126.9, 126.2, 123.4, 123.1, 85.9, 61.7, 38.0, 26.9, 25.0, 23.0, 14.1. IR (acetone)  $\nu$  3464, 3026, 2930, 2871, 1487, 1446, 1395, 1092, 934, 700  $\text{cm}^{-1}$ . HRMS (FI) calcd. for  $\text{C}_{19}\text{H}_{22}\text{O}$  ( $\text{M}^+$ ): 266.1665, Found: 266.1670.

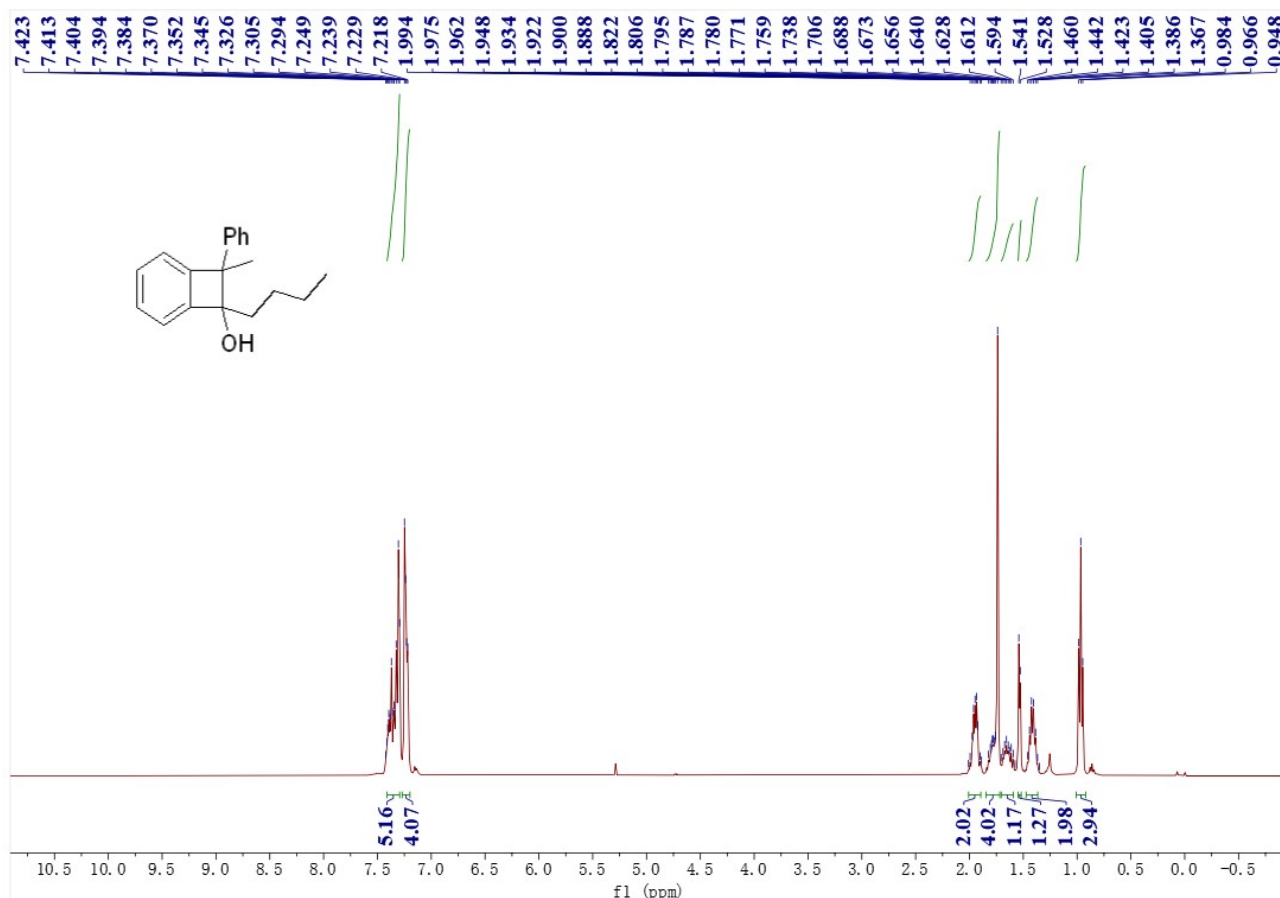

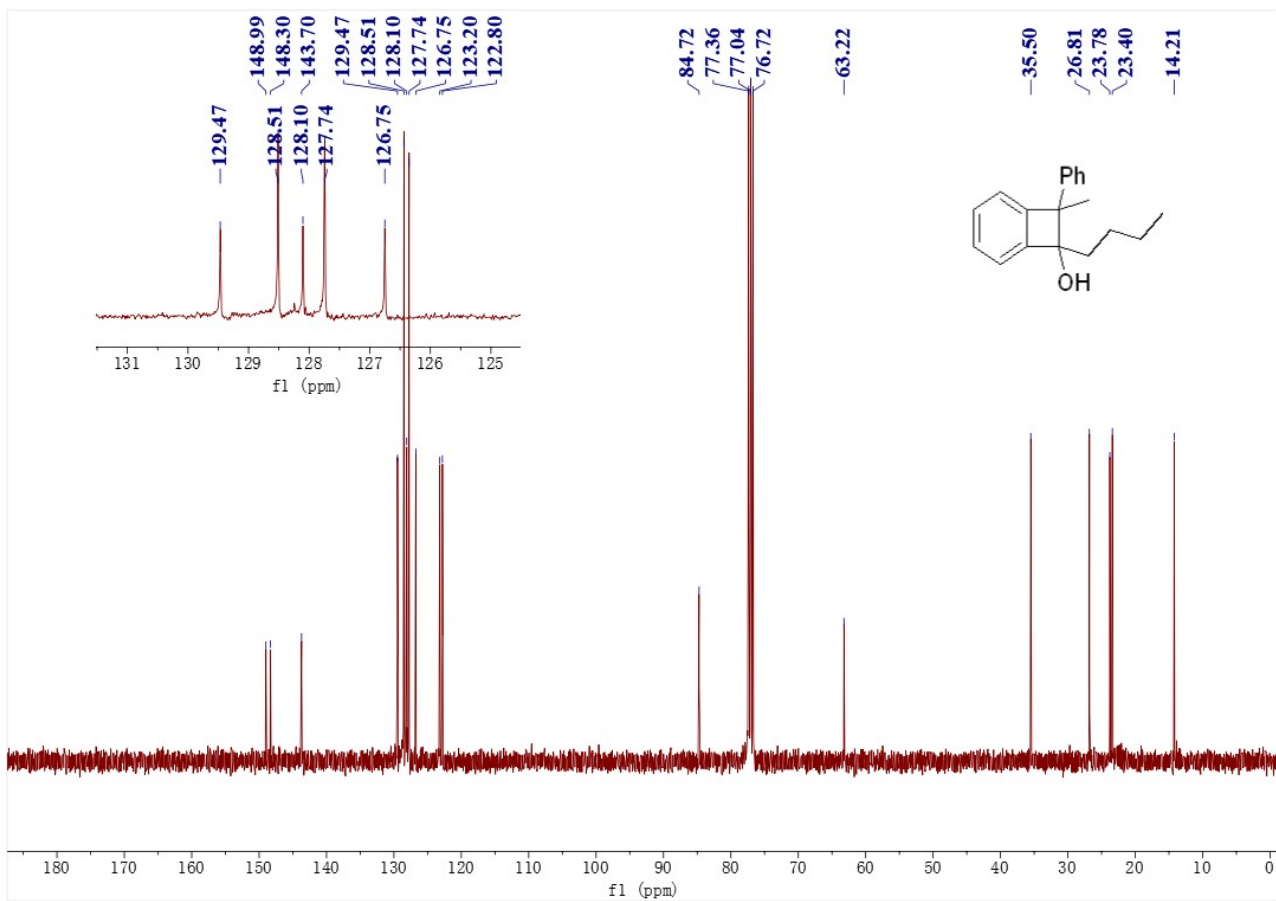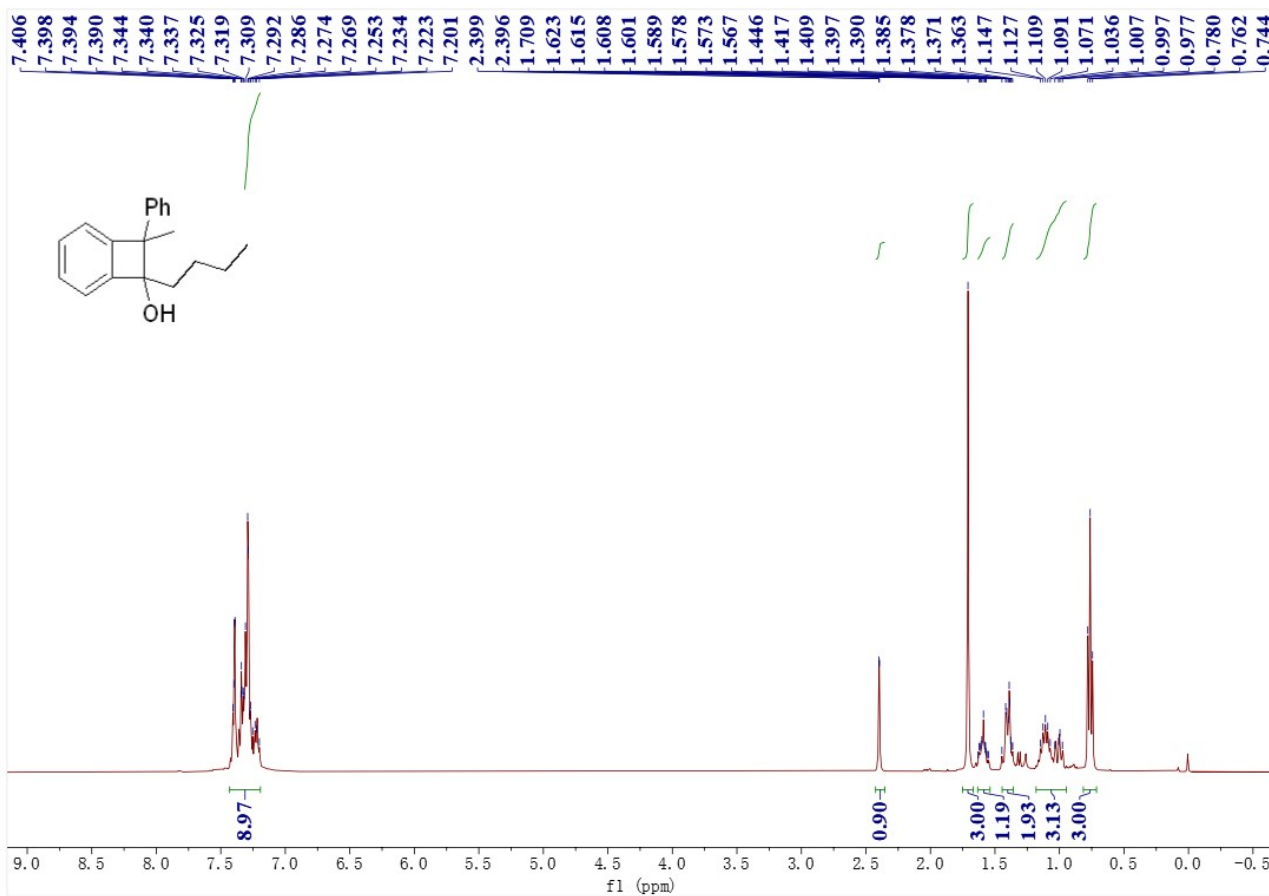

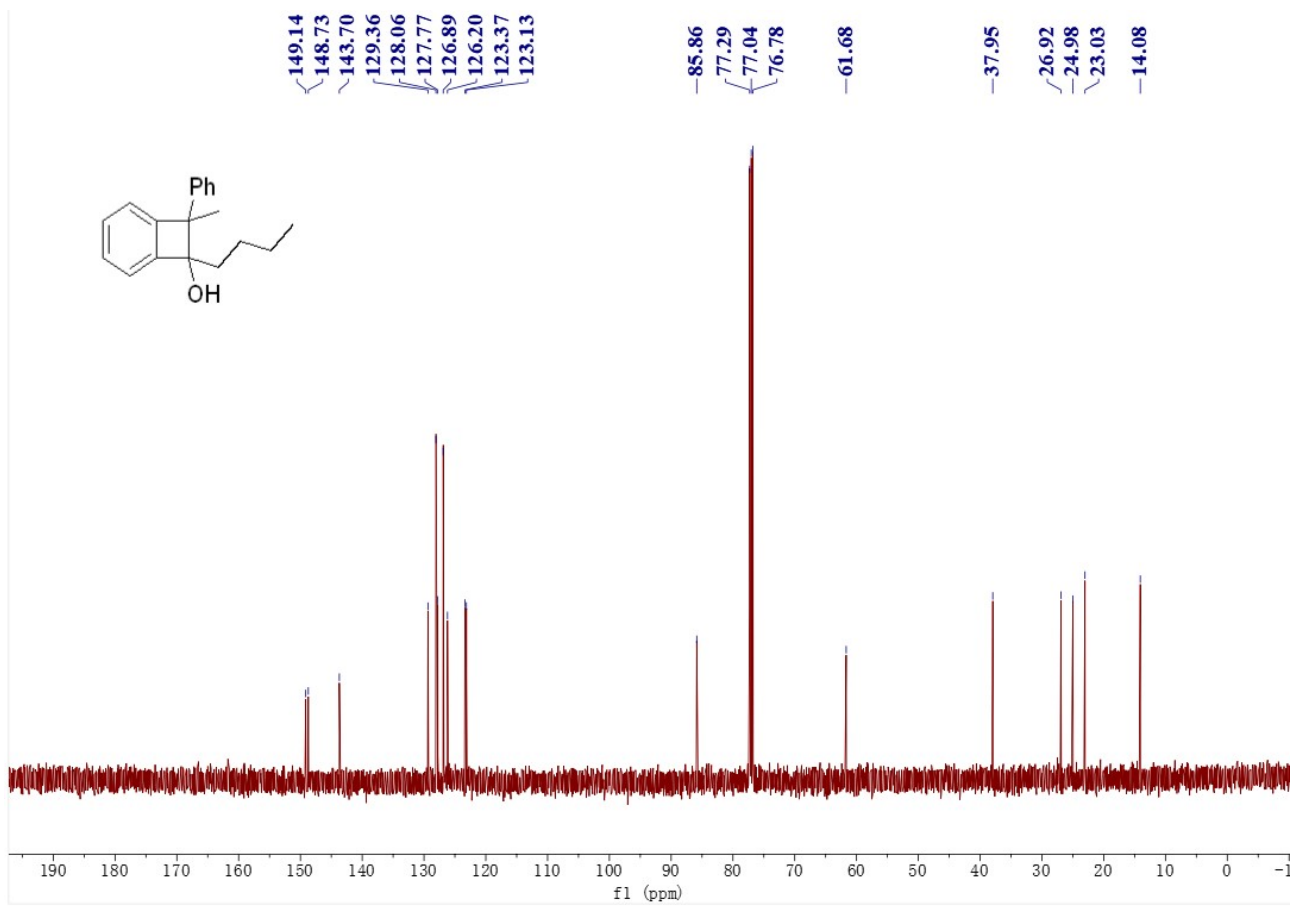

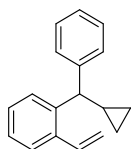

### 1-(cyclopropyl(phenyl)methyl)-2-vinylbenzene (4)

A colorless oil. 42.2 mg, 90% yield.  $^1\text{H}$  NMR ( $\text{CDCl}_3$ , TMS, 400 MHz)  $\delta$  7.50-7.44 (m, 2H), 7.31-7.15 (m, 7H), 6.86 (dd,  $J = 17.4, 11.2$  Hz, 1H), 5.53 (d,  $J = 17.4$  Hz, 1H), 5.17 (d,  $J = 11.2$  Hz, 1H), 3.56 (d,  $J = 9.2$  Hz, 1H), 1.40-1.35 (m, 1H), 0.74-0.69 (m, 1H), 0.61-0.56 (m, 1H), 0.39-0.36 (m, 1H), 0.22-0.18 (m, 1H).  $^{13}\text{C}$  NMR ( $\text{CDCl}_3$ , TMS, 125 MHz)  $\delta$  144.8, 142.0, 137.0, 135.2, 128.4, 128.2, 128.2, 127.7, 126.4, 126.2, 126.0, 115.9, 51.4, 16.9, 6.0, 4.5. IR (acetone)  $\nu$  3061, 3024, 3001, 1493, 1480, 1450, 1019, 989, 749, 699  $\text{cm}^{-1}$ . HRMS (EI) calcd. for  $\text{C}_{18}\text{H}_{18}$  ( $\text{M}^+$ ): 234.1403, Found: 234.1405.

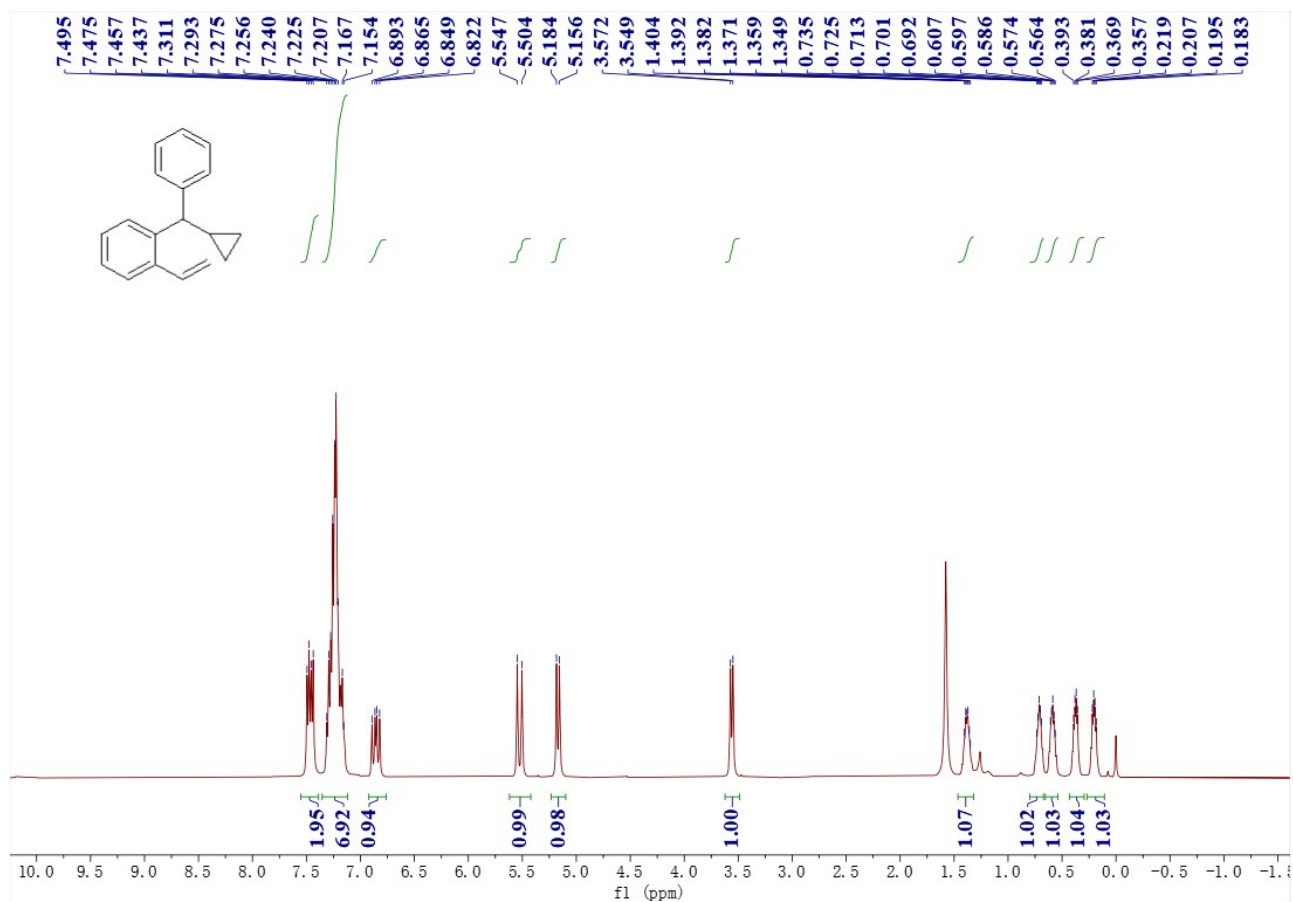

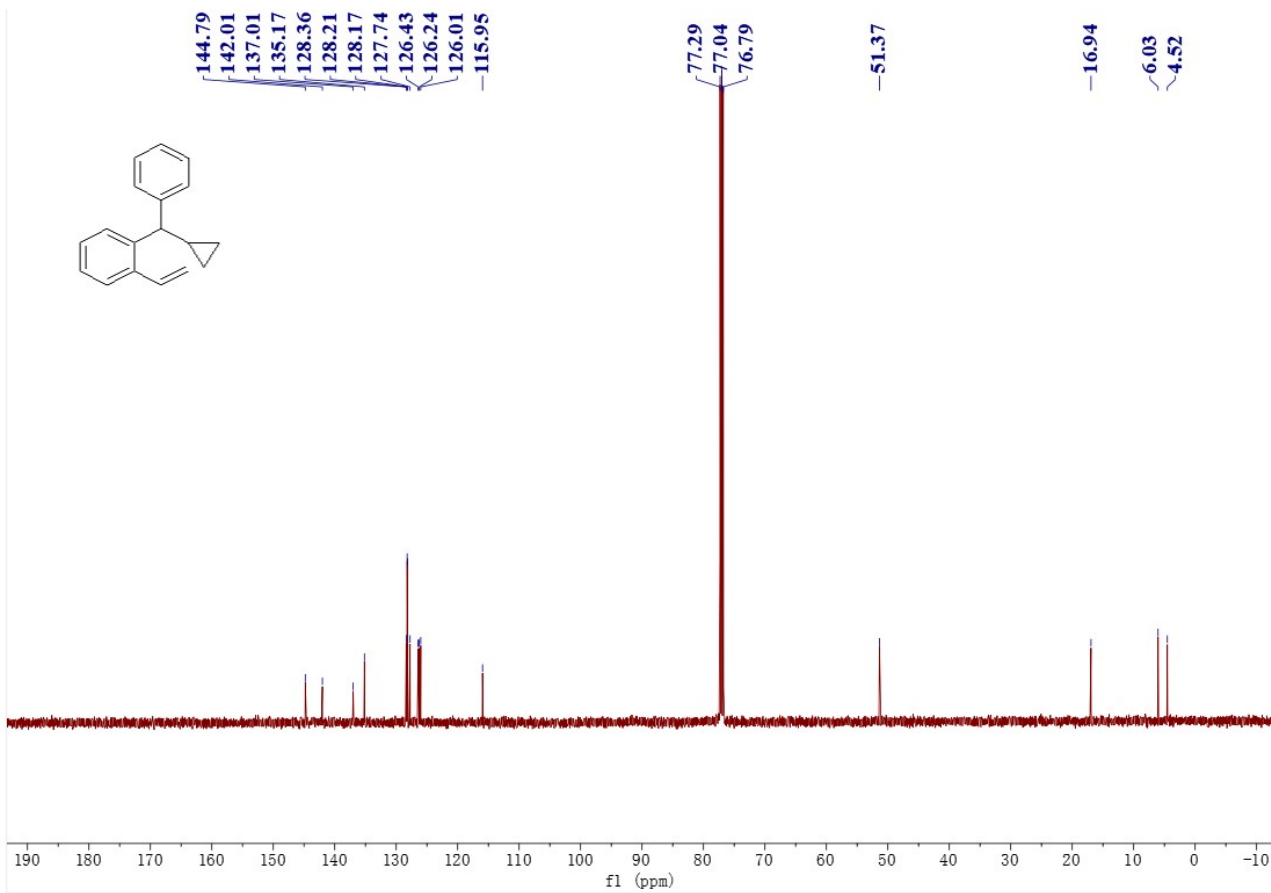



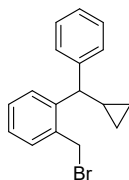

### 1-(bromomethyl)-2-(cyclopropyl(phenyl)methyl)benzene (5)

A colorless oil. 18.7 mg, 31% yield.  $^1\text{H}$  NMR ( $\text{CDCl}_3$ , TMS, 400 MHz)  $\delta$  7.61 (d,  $J = 7.8$  Hz, 1H), 7.37-7.19 (m, 8H), 4.36 (d,  $J = 10.2$  Hz, 1H), 4.32 (d,  $J = 10.2$  Hz, 1H), 3.73 (d,  $J = 8.8$  Hz, 1H), 1.43-1.37 (m, 1H), 0.72-0.62 (m, 2H), 0.44-0.39 (m, 1H), 0.29-0.26 (m, 1H).  $^{13}\text{C}$  NMR ( $\text{CDCl}_3$ , TMS, 100 MHz)  $\delta$  144.4, 143.7, 135.6, 130.8, 129.0, 128.4, 128.1, 126.8, 126.4, 50.6, 32.1, 17.1, 5.9, 4.7. IR (acetone)  $\nu$  3061, 3025, 3001, 1493, 1450, 1428, 1074, 1020, 767, 699  $\text{cm}^{-1}$ . HRMS (FI) calcd. for  $\text{C}_{17}\text{H}_{17}\text{Br}$  ( $\text{M}^+$ ): 300.0508, Found: 300.0504.

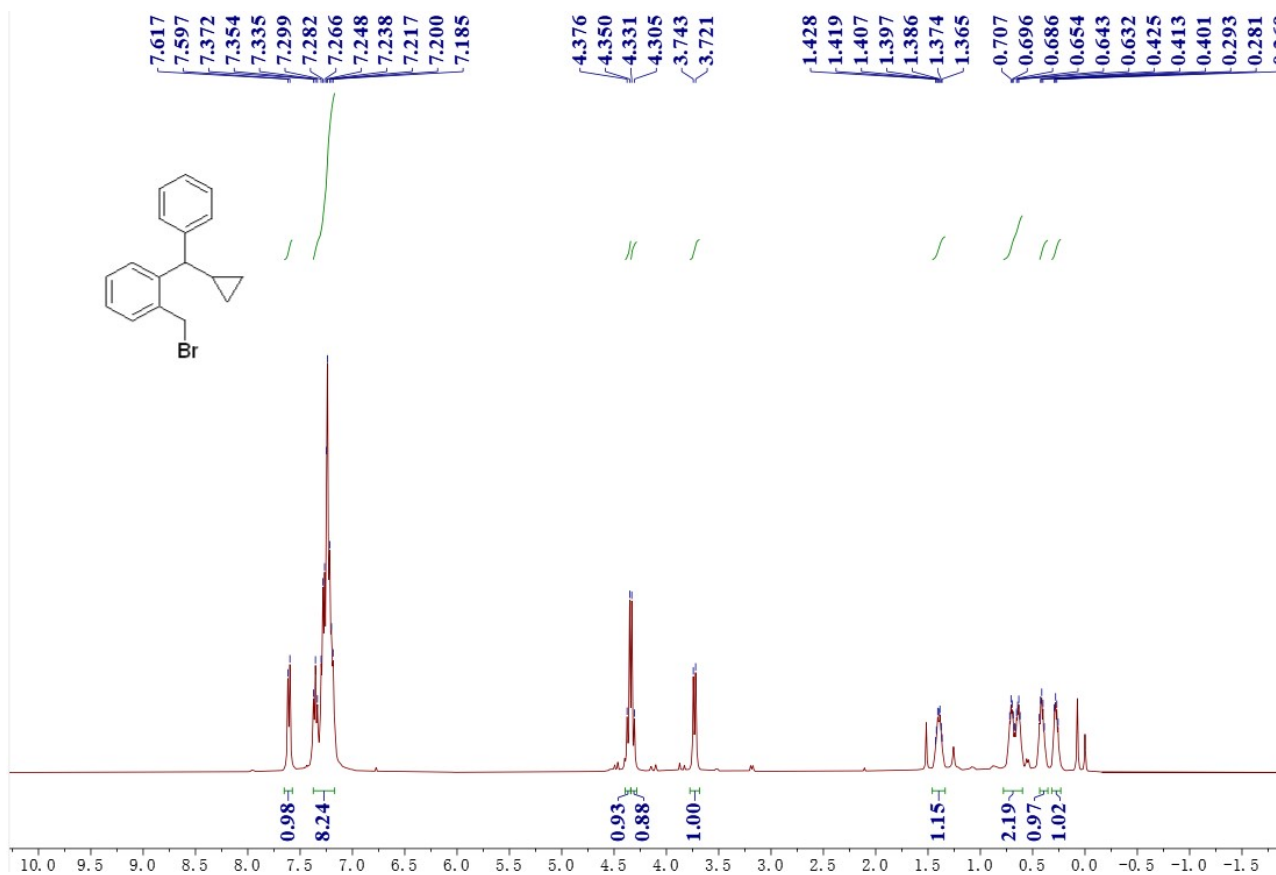

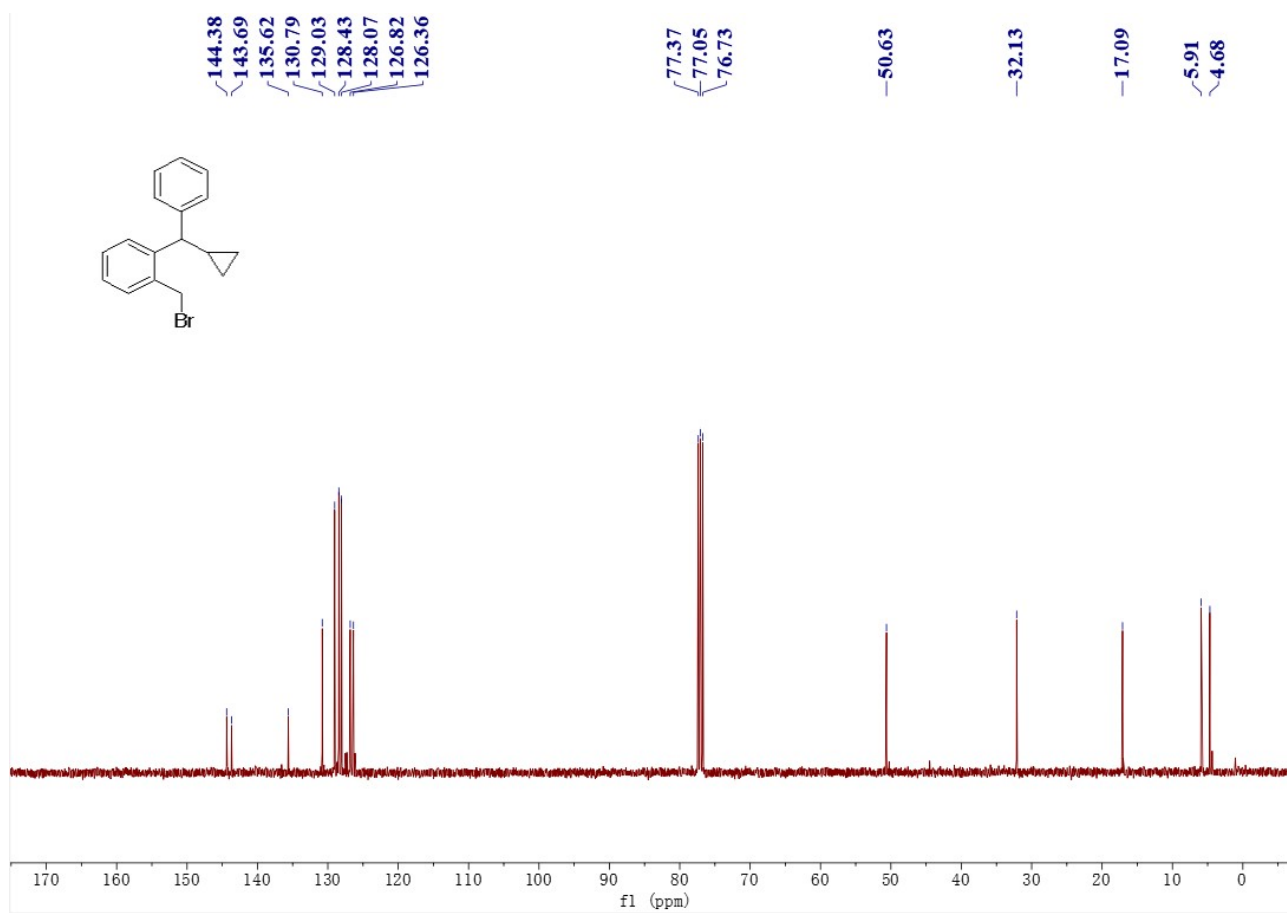

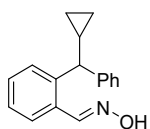

**(E)-2-(cyclopropyl(phenyl)methyl)benzaldehyde oxime (6)**

A colorless oil. 30.2 mg, 60% yield.  $^1\text{H}$  NMR ( $\text{CDCl}_3$ , TMS, 400 MHz)  $\delta$  8.30 (s, 1H), 8.19 (s, 1H), 7.66 (d,  $J = 7.8$  Hz, 1H), 7.54 (d,  $J = 7.8$  Hz, 1H), 7.40 (t,  $J = 7.2$  Hz, 1H), 7.28-7.16 (m, 6H), 3.61 (d,  $J = 9.2$  Hz, 1H), 1.41-1.32 (m, 1H), 0.77-0.70 (m, 1H), 0.63-0.58 (m, 1H), 0.41-0.36 (m, 1H), 0.23-0.17 (m, 1H).  $^{13}\text{C}$  NMR ( $\text{CDCl}_3$ , TMS, 100 MHz)  $\delta$  149.0, 144.2, 143.4, 130.1, 129.9, 128.9, 128.4, 128.1, 126.8, 126.6, 126.3, 51.2, 16.9, 6.1, 4.6. IR (acetone)  $\nu$  3329, 3062, 3001, 2886, 1746, 1493, 1450, 1048, 1020, 755, 700  $\text{cm}^{-1}$ . HRMS (FI) calcd. for  $\text{C}_{17}\text{H}_{17}\text{ON}$  ( $\text{M}^+$ ): 251.1305, Found: 251.1308.

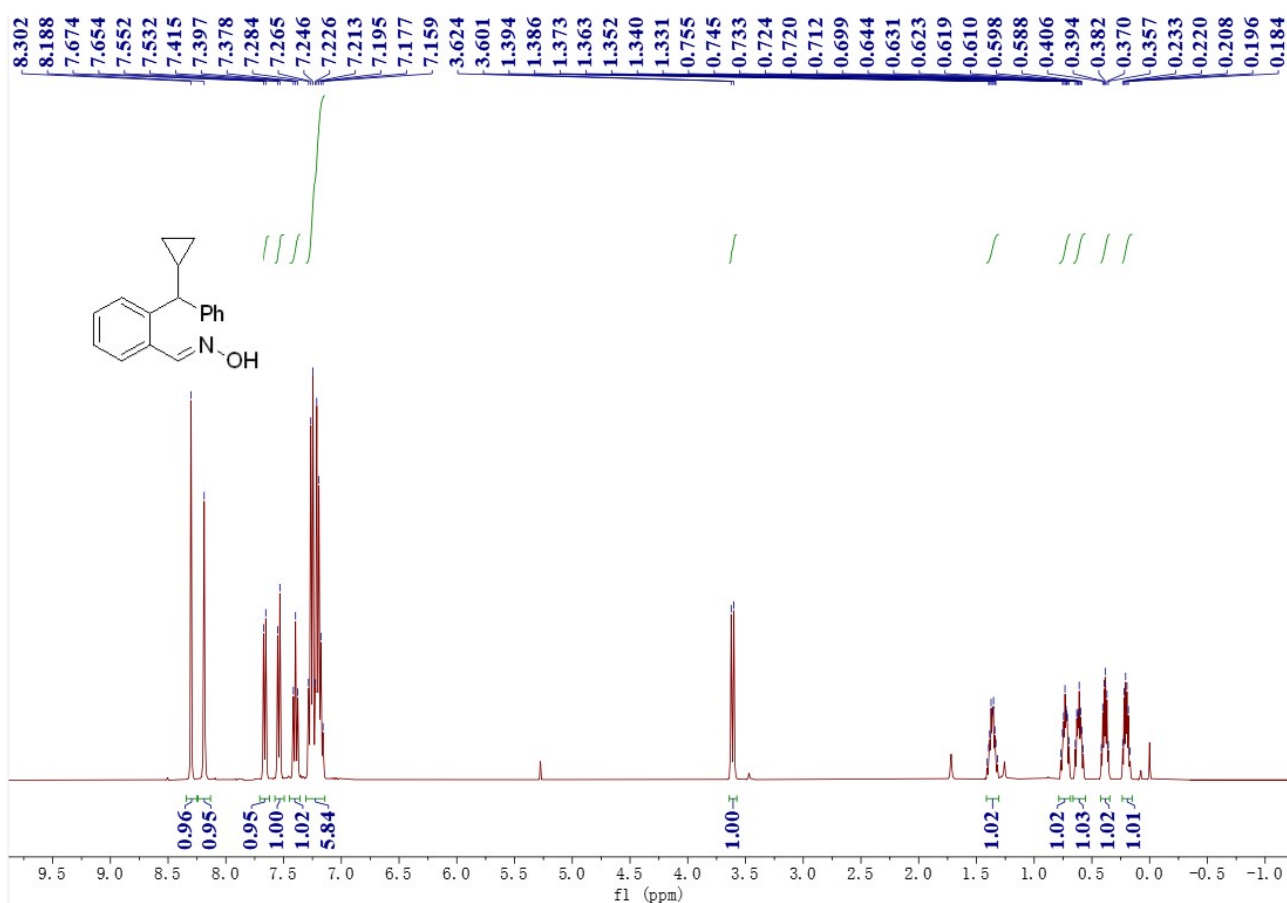

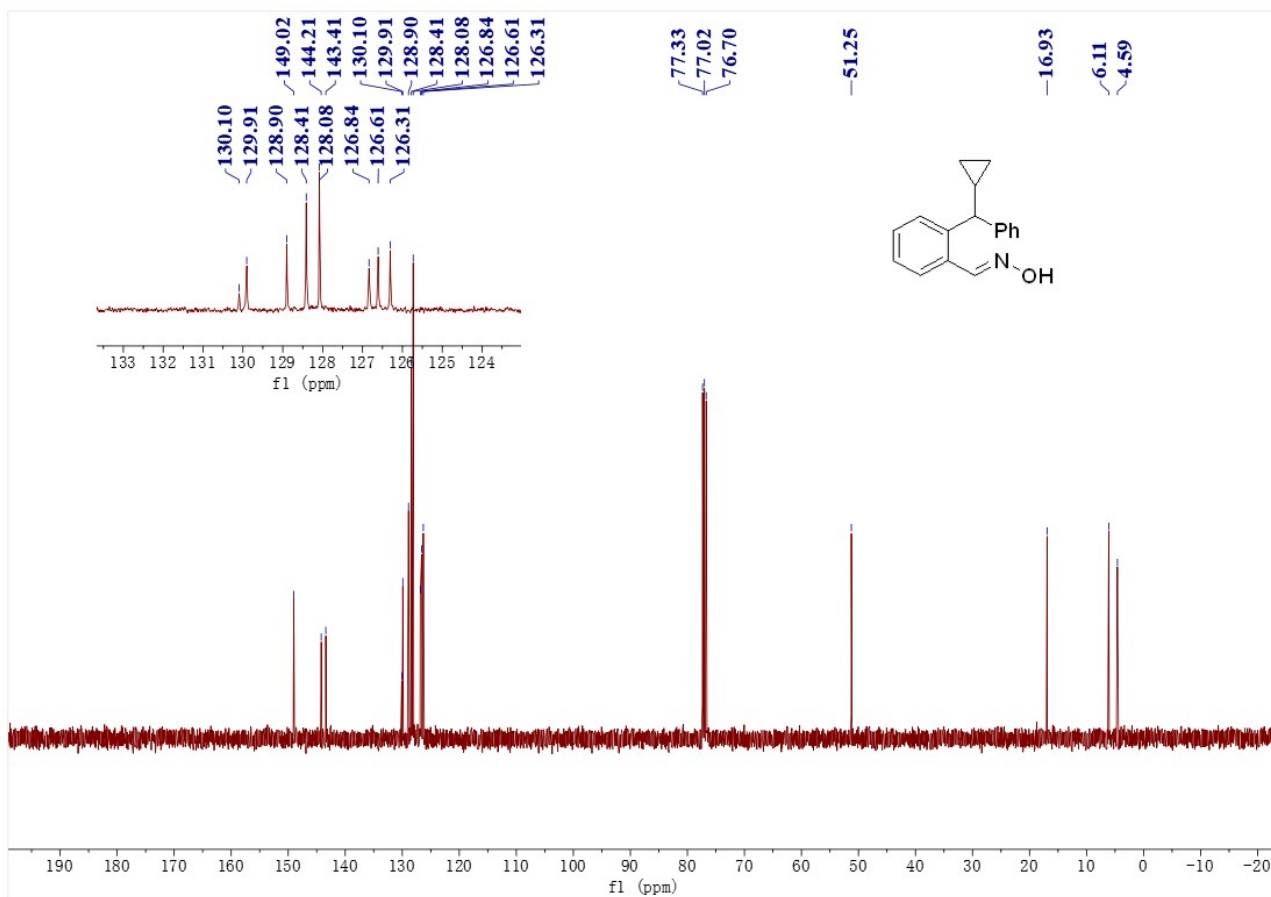

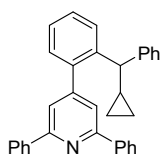

#### 4-(2-(cyclopropyl(phenyl)methyl)phenyl)-2,6-diphenylpyridine (7)

A colorless oil. 30.1 mg, 35% yield.  $^1\text{H}$  NMR ( $\text{CDCl}_3$ , TMS, 400 MHz)  $\delta$  8.09 (d,  $J = 7.4$  Hz, 4H), 7.81 (d,  $J = 8.0$  Hz, 1H), 7.57-7.39 (m, 10H), 7.32-7.21 (m, 4H), 7.14 (d,  $J = 7.6$  Hz, 2H), 3.46 (d,  $J = 9.2$  Hz, 1H), 1.47-1.41 (m, 1H), 0.71-0.59 (m, 2H), 0.31-0.28 (m, 1H), 0.15-0.11 (m, 1H).  $^{13}\text{C}$  NMR ( $\text{CDCl}_3$ , TMS, 100 MHz)  $\delta$  156.3, 151.2, 144.9, 142.1, 140.1, 139.2, 129.4, 129.0, 128.7, 128.6, 128.4, 128.28, 128.26, 127.0, 126.3, 126.0, 119.5, 51.7, 17.6, 6.0, 4.7. IR (acetone)  $\nu$  3062, 3025, 2928, 1690, 1594, 1450, 1069, 1027, 777, 696  $\text{cm}^{-1}$ . HRMS (ESI) calcd. for  $\text{C}_{33}\text{H}_{28}\text{N}$  ( $\text{M}^+$ ): 438.2216, Found: 438.2210.

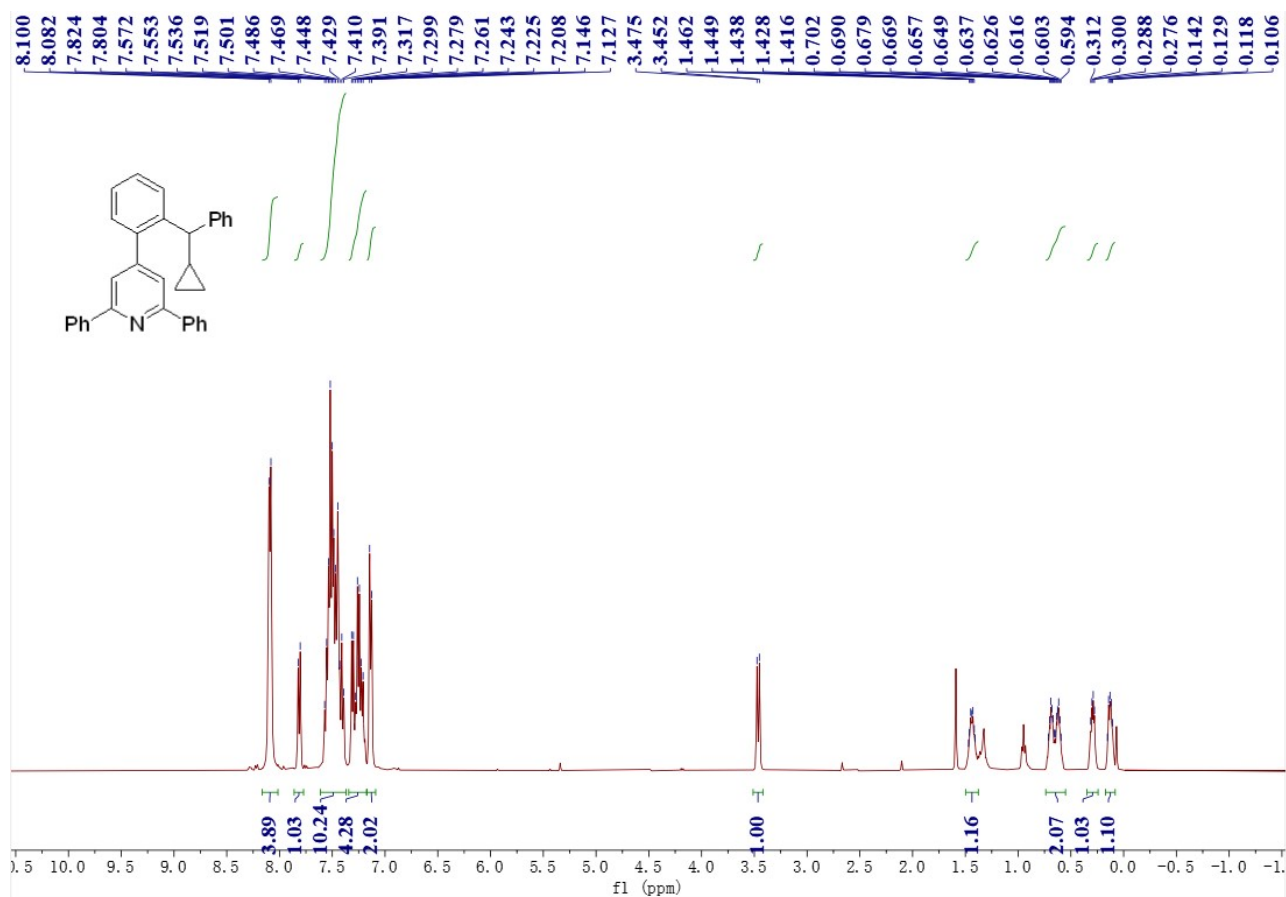

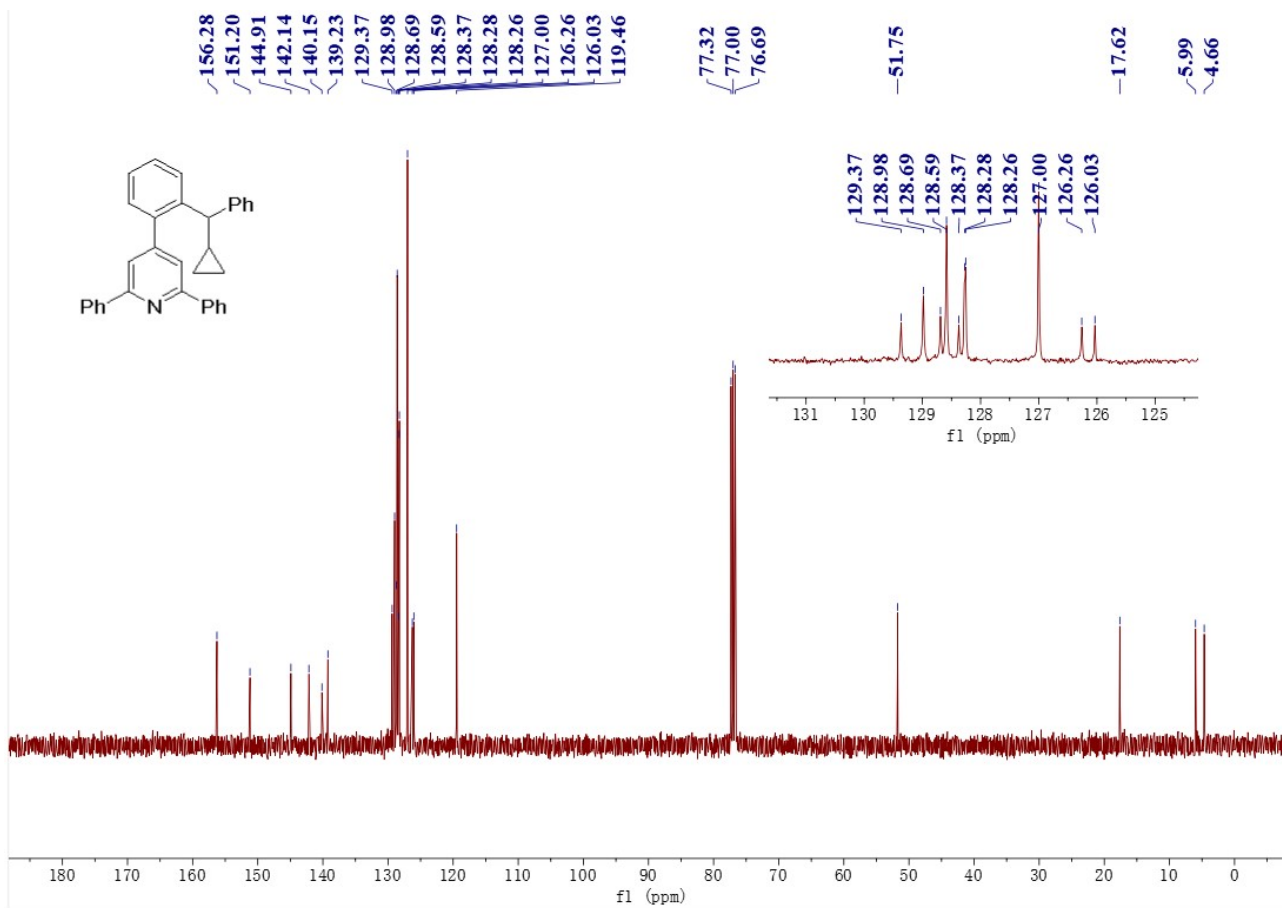

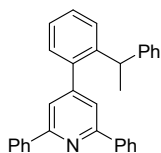

### 2,6-diphenyl-4-(2-(1-phenylethyl)phenyl)pyridine (8)

A colorless oil. 31.3 mg, 38% yield.  $^1\text{H}$  NMR ( $\text{CDCl}_3$ , TMS, 400 MHz)  $\delta$  8.05 (d,  $J = 7.4$  Hz, 4H), 7.51-7.40 (m, 10H), 7.33 (t,  $J = 7.4$  Hz, 1H), 7.28-7.15 (m, 4H), 7.04 (d,  $J = 7.4$  Hz, 2H), 4.28 (q,  $J = 7.2$  Hz, 1H), 1.60 (d,  $J = 7.2$  Hz, 3H).  $^{13}\text{C}$  NMR ( $\text{CDCl}_3$ , TMS, 100 MHz)  $\delta$  156.4, 151.2, 146.6, 142.9, 139.9, 139.2, 129.5, 129.0, 128.6, 128.5, 128.4, 127.7, 127.6, 127.0, 126.3, 125.9, 119.5, 41.0, 22.8. IR (acetone)  $\nu$  3061, 3026, 2927, 1689, 1540, 1449, 1125, 1027, 760, 668  $\text{cm}^{-1}$ . HRMS (ESI) calcd. for  $\text{C}_{31}\text{H}_{26}\text{N}$  ( $\text{M}^+$ ): 412.2060, Found: 412.2052.

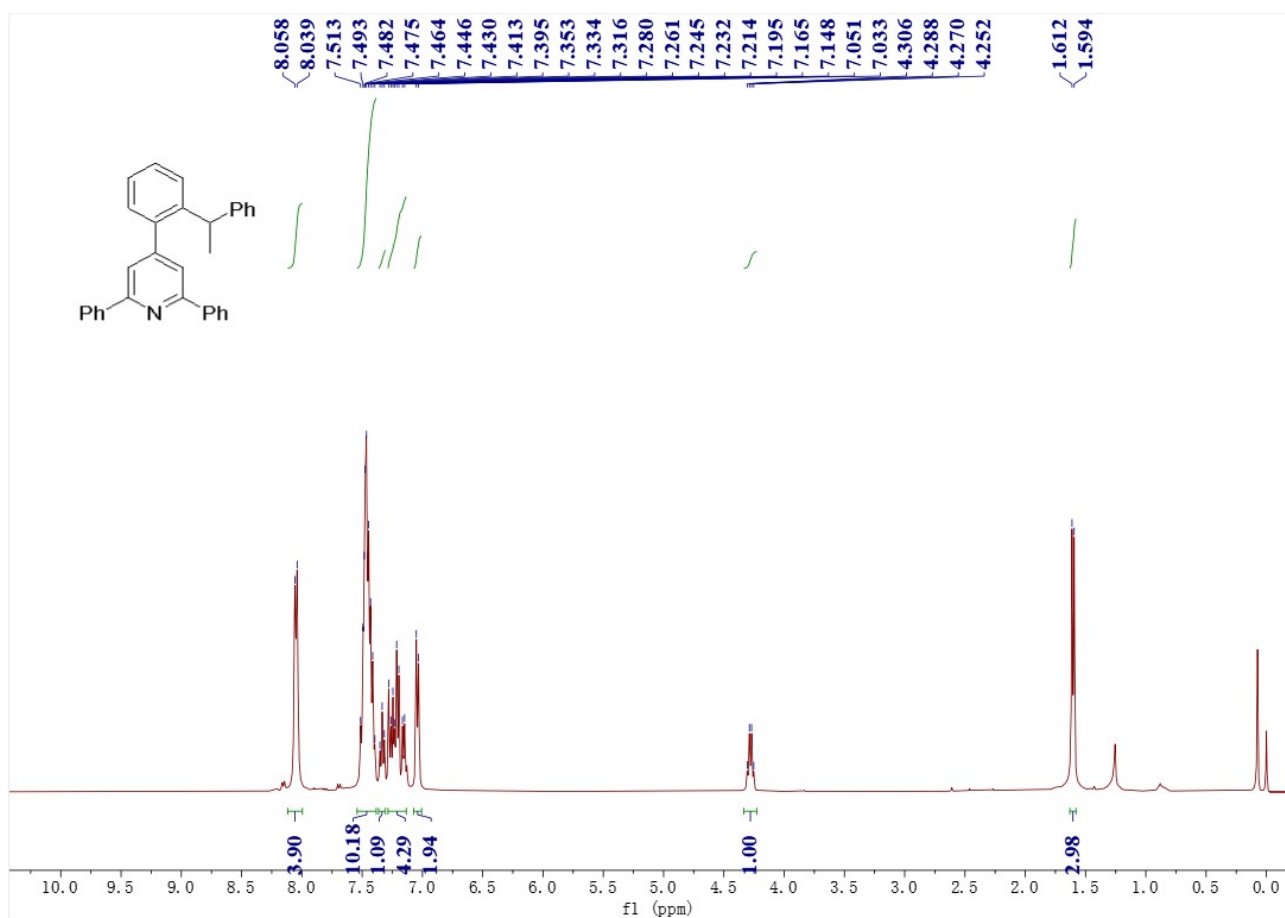

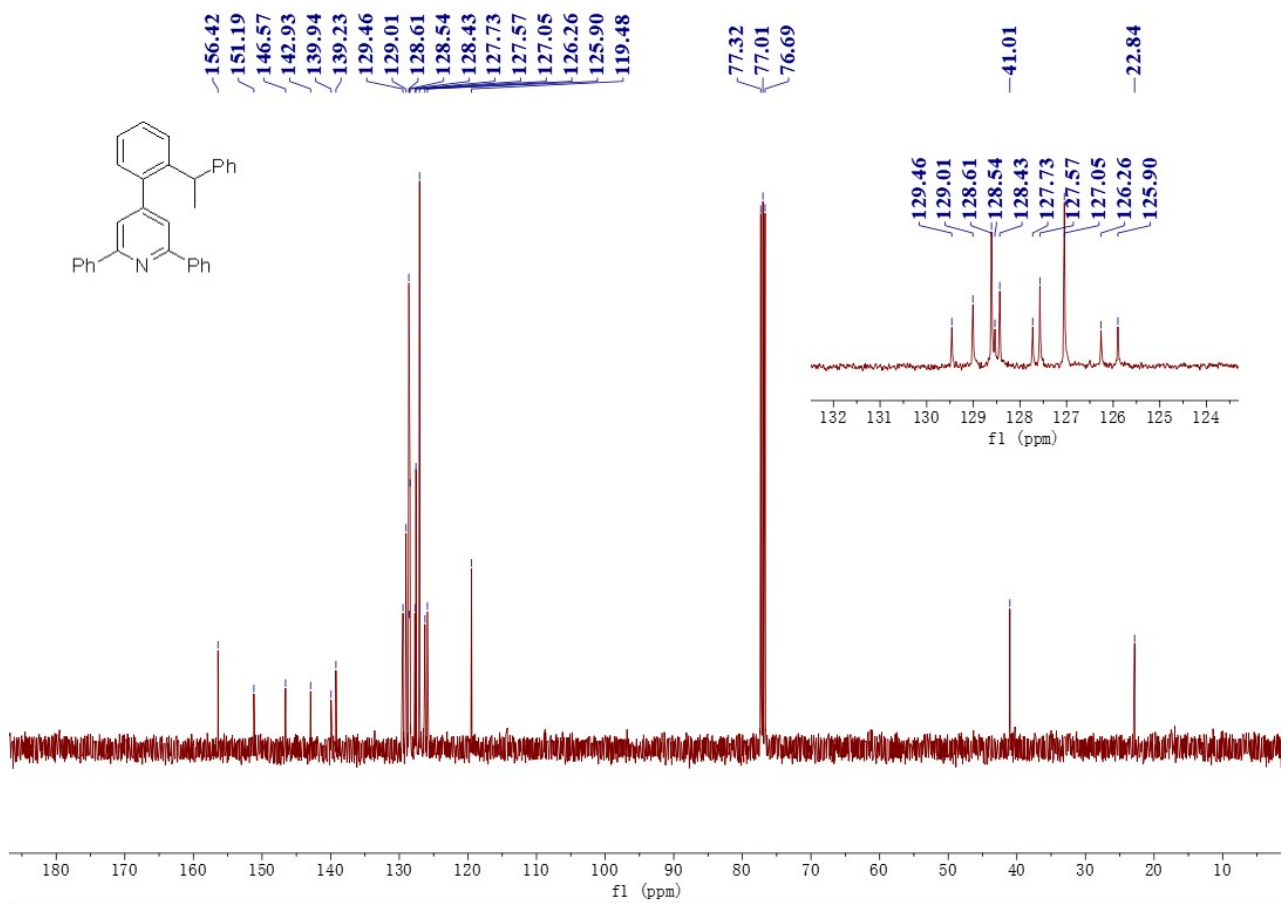



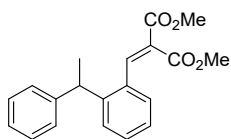

### Dimethyl 2-(2-(1-phenylethyl)benzylidene)malonate (9)

A colorless oil. 54.5 mg, 84% yield.  $^1\text{H}$  NMR ( $\text{CDCl}_3$ , TMS, 400 MHz)  $\delta$  8.06 (s, 1H), 7.33 (t,  $J = 7.0$  Hz, 1H), 7.30-7.23 (m, 4H), 7.20-7.17 (m, 4H), 4.34 (q,  $J = 7.2$  Hz, 1H), 3.83 (s, 3H), 3.64 (s, 3H), 1.62 (d,  $J = 7.2$  Hz, 3H).  $^{13}\text{C}$  NMR ( $\text{CDCl}_3$ , TMS, 100 MHz)  $\delta$  166.4, 164.2, 145.3, 144.9, 143.5, 132.5, 130.1, 128.4, 128.0, 127.8, 127.7, 127.4, 126.3, 126.2, 52.6, 52.3, 41.5, 21.7. IR (acetone)  $\nu$  3025, 2952, 1726, 1627, 1435, 1363, 1211, 1178, 816, 699  $\text{cm}^{-1}$ . HRMS (ESI) calcd. for  $\text{C}_{20}\text{H}_{20}\text{O}_4\text{Na}$  ( $\text{M}+\text{Na}$ ) $^+$ : 347.1253, Found: 347.1248.

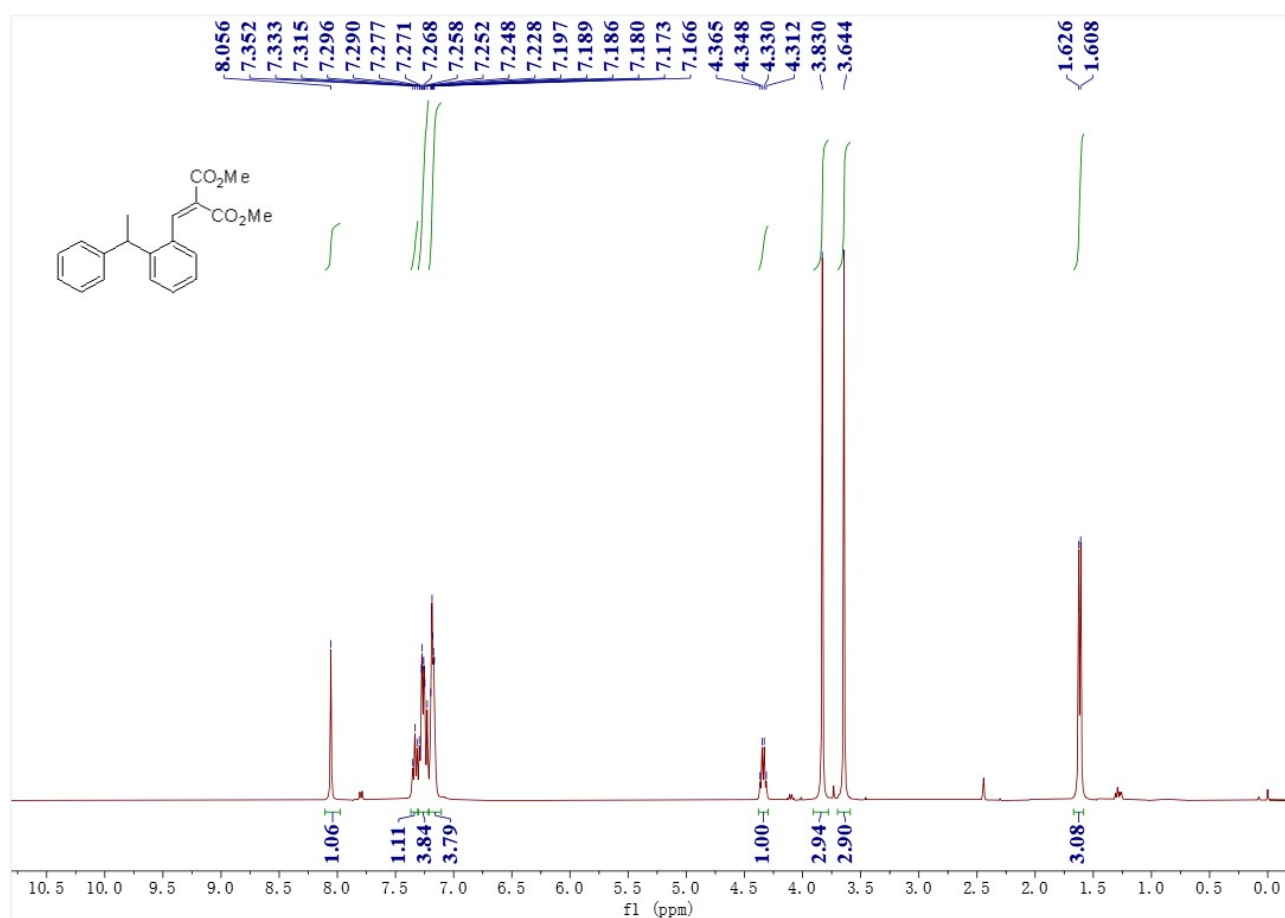

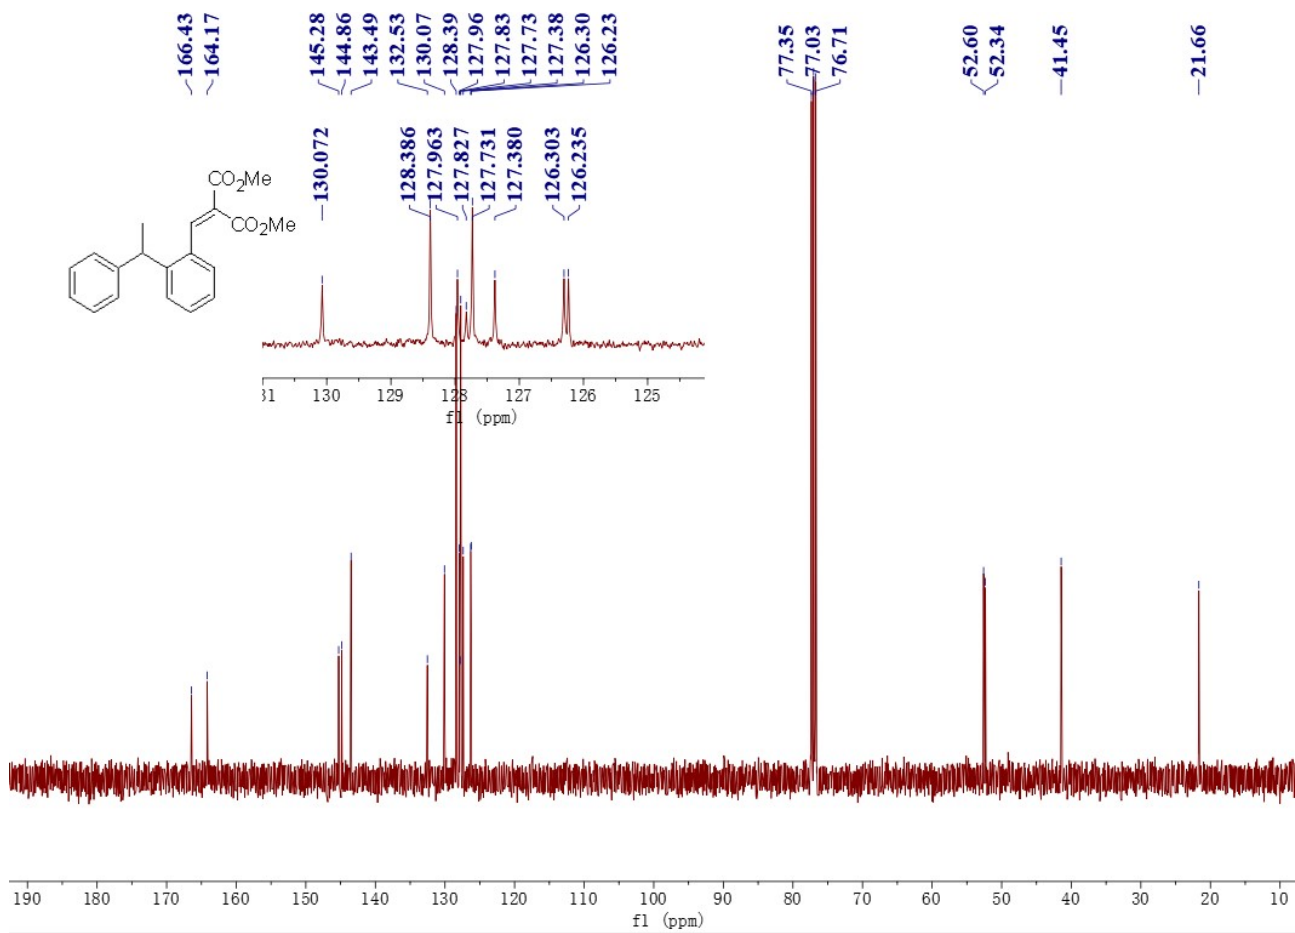

## 8. Computational details

All quantum mechanical calculations have been performed with Gaussian 16. The geometries of all species have been optimized at M06/def2svp level. The subsequent frequency calculations on the stationary points were carried out at the same level of theory to ascertain the nature of the stationary points as minima on the respective potential energy surfaces. The conformational space of flexible systems has first been searched manually and checked by xtb 6.0 program.<sup>18</sup> Thermochemical corrections to 298.15 K have been calculated for all minima from unscaled vibrational frequencies obtained at this same level. The thermochemical corrections have been combined with single-point energies calculated at the SMD/M06/def2tzvpp//M06/def2svp level to yield free energy  $G_{298}$  at 298.15 K. The solvent effect was estimated by the IEFPCM method with radii and nonelectrostatic terms for SMD salvation model in acetonitrile ( $\epsilon = 35.688$ ).

|                | $E_{\text{tot}}$ | $H_{298}$   | $G_{298}$   |
|----------------|------------------|-------------|-------------|
| <b>1a</b>      | -732.338744      | -732.338744 | -732.104125 |
| <b>Int-1a</b>  | -732.263832      | -731.970064 | -732.033133 |
| <b>Ts-1a</b>   | -732.242619      | -731.954231 | -732.014331 |
| <b>Int-2a</b>  | -732.302194      | -732.008444 | -732.070964 |
| <b>Int-3a</b>  | -732.310752      | -732.014776 | -732.073992 |
| <b>Ts-2a</b>   | -732.306983      | -732.016095 | -732.073266 |
| <b>Ts-3a</b>   | -732.293235      | -731.999234 | -732.057507 |
| <b>2a</b>      | -732.368948      | -732.072449 | -732.131522 |
| <b>3a</b>      | -732.336894      | -732.040463 | -732.099048 |
| <b>1b</b>      | -654.989248      | -654.728352 | -654.7849   |
| <b>Int-1b</b>  | -654.907313      | -654.650127 | -654.707531 |
| <b>Ts-1b</b>   | -654.889165      | -654.636564 | -654.691715 |
| <b>Int-2b</b>  | -654.939631      | -654.681757 | -654.7403   |
| <b>Int-3b</b>  | -654.960637      | -654.700351 | -654.756498 |
| <b>Ts-2b</b>   | -654.947388      | -654.691995 | -654.744907 |
| <b>Ts-3b</b>   | -654.933922      | -654.675422 | -654.728953 |
| <b>2b</b>      | -655.011335      | -654.750471 | -654.806058 |
| <b>3b</b>      | -654.977768      | -654.716674 | -654.770762 |
| <b>1ae</b>     | -812.176189      | -811.797548 | -811.866363 |
| <b>Int-1ae</b> | -812.095129      | -811.720512 | -811.791202 |
| <b>Ts-1ae</b>  | -812.079921      | -811.709825 | -811.778621 |
| <b>Int-2ae</b> | -812.127374      | -811.751853 | -811.823366 |

|                 |             |             |             |
|-----------------|-------------|-------------|-------------|
| <b>Int-3ae</b>  | -812.147986 | -811.770428 | -811.839520 |
| <b>Int-2ae'</b> | -812.127120 | -811.751467 | -811.823698 |
| <b>Int-3ae'</b> | -812.149408 | -811.77166  | -811.840823 |
| <b>Ts-2ae</b>   | -812.140132 | -811.766959 | -811.834335 |
| <b>Ts-3ae</b>   | -812.123888 | -811.748006 | -811.813468 |
| <b>Ts-3ae'</b>  | -812.123368 | -811.813846 | -811.854388 |
| <b>Ts-4</b>     | -812.107609 | -811.733128 | -811.801746 |
| <b>Ts-5</b>     | -812.086964 | -811.712161 | -811.778749 |
| <b>2ae</b>      | -812.202019 | -811.823613 | -811.893181 |
| <b>3</b>        | -812.165864 | -811.787379 | -811.852386 |
| <b>3'</b>       | -812.164283 | -811.786353 | -811.854980 |

**1a**

```

1\1\GINC-B2164\SP\RM06\def2TZVPP\C17H16O1\ROOT\23-Mar-2023\0\#\#p def2T
ZVPP m06 scrf=(iefpcm,smd,solvent=Acetonitrile)\1a\0,1\C,0,1.328442,
-1.071993,-0.946493\C,0,1.357389,0.137456,-0.236795\C,0,2.595783,0.587
2,0.251074\C,0,3.759506,-0.139383,0.029436\C,0,3.716026,-1.335751,-0.6
86863\C,0,2.495325,-1.79718,-1.171937\H,0,0.375079,-1.454359,-1.322021
\H,0,2.640525,1.517047,0.824153\H,0,4.711263,0.229338,0.423815\H,0,4.6
32071,-1.907608,-0.861808\H,0,2.446196,-2.735538,-1.73216\C,0,0.116735
,0.919055,-0.027189\C,0,-1.206694,0.249925,-0.183558\C,0,-1.600626,-0.
832411,0.623951\C,0,-2.098375,0.727841,-1.153186\C,0,-2.855994,-1.4131
15,0.424642\C,0,-3.346263,0.142779,-1.339842\H,0,-1.787092,1.569551,-1
.780389\C,0,-3.728113,-0.938132,-0.548373\H,0,-3.144554,-2.260514,1.05
6535\H,0,-4.020988,0.530039,-2.108992\H,0,-4.70583,-1.408251,-0.688018
\C,0,0.133193,2.226098,0.257531\C,0,-0.646641,3.427361,0.524259\C,0,0.
874793,3.459959,0.484952\H,0,1.365907,3.94665,-0.368272\H,0,1.407937,3
.598201,1.435108\H,0,-1.140421,3.534259,1.498922\H,0,-1.195018,3.90053
8,-0.300498\C,0,-0.709142,-1.424915,1.677207\H,0,-1.29759,-1.540881,2.
61318\O,0,-0.245357,-2.669149,1.214375\H,0,0.122083,-0.73143,1.9098\H,
0,0.441231,-2.982618,1.812748\Version=ES64L-G16RevA.03\State=1-A\HF=-
732.3387442\RMSD=8.285e-09\Dipole=0.2534951,0.5277172,0.7099081\Quadru
pole=1.6223833,-0.1952131,-1.4271702,-1.1478394,3.6668724,-1.974771\PG
=C01 [X(C17H16O1)]\@

```

### Int-1a

1\1\GINC-B2146\SP\UM06\def2TZVPP\C17H16O1(3)\ROOT\23-Mar-2023\0\#p sc  
rf=(iefpcm,smd,solvent=Acetonitrile) M06 def2tzvpp\int1\0,3\C,0,1.63  
131,-1.11589,-0.679459\C,0,1.477484,0.22947,-0.254409\C,0,2.656938,0.9  
76685,0.003963\C,0,3.911269,0.411311,-0.153183\C,0,4.041285,-0.916706,  
-0.573161\C,0,2.892136,-1.670541,-0.832491\H,0,0.740735,-1.721875,-0.8  
68362\H,0,2.553615,2.018049,0.330721\H,0,4.804656,1.009209,0.051727\H,  
0,5.032895,-1.361284,-0.697896\H,0,2.985446,-2.710376,-1.160239\C,0,0.  
191981,0.828304,-0.098449\C,0,-1.076766,0.095243,-0.345259\C,0,-1.6009  
26,-0.813209,0.593508\C,0,-1.802857,0.357396,-1.516031\C,0,-2.814134,-  
1.451131,0.323698\C,0,-3.011982,-0.282737,-1.769941\H,0,-1.389472,1.06  
436,-2.243741\C,0,-3.521076,-1.193186,-0.846143\H,0,-3.203996,-2.16776  
4,1.055312\H,0,-3.557039,-0.072464,-2.694849\H,0,-4.470175,-1.701754,-  
1.038149\C,0,0.04554,2.201129,0.349229\C,0,-0.811787,2.818483,1.379645  
\C,0,-0.825273,3.322387,-0.041273\H,0,-1.706442,3.108624,-0.66278\H,0,  
-0.362703,4.297334,-0.246924\H,0,-0.34556,3.448247,2.149455\H,0,-1.679  
122,2.243758,1.737258\C,0,-0.849543,-1.173133,1.841704\H,0,-1.571914,-  
1.272124,2.680338\O,0,-0.168809,-2.382183,1.611307\H,0,-0.153933,-0.35  
1913,2.108044\H,0,0.47189,-2.515812,2.31794\Version=ES64L-G16RevA.03\  
State=3-A\HF=-732.2638318\S2=2.034883\S2-1=0.\S2A=2.000639\RMSD=7.871e  
-09\Dipole=-0.3548634,0.4988659,0.6905083\Quadrupole=1.754865,-1.84562  
71,0.0907621,-0.357858,2.9141383,-1.3654654\PG=C01 [X(C17H16O1)]\@

### Ts-1a

1\1\GINC-B2117\SP\UM06\def2TZVPP\C17H16O1(3)\ROOT\23-Mar-2023\0\#p sc  
rf=(iefpcm,smd,solvent=Acetonitrile) M06 def2tzvpp\ts1\0,3\C,0,1.679  
107,-1.32788,0.826344\C,0,1.488127,-0.219213,-0.029244\C,0,2.640253,0.  
337931,-0.625369\C,0,3.903421,-0.193838,-0.394912\C,0,4.065578,-1.2931  
22,0.447097\C,0,2.943025,-1.852734,1.058862\H,0,0.813467,-1.755708,1.3

4059\H,0,2.541112,1.183717,-1.310248\H,0,4.773186,0.253065,-0.885778\H  
,0,5.060689,-1.70852,0.629532\H,0,3.056332,-2.703751,1.737228\C,0,0.16  
1263,0.349151,-0.22837\C,0,-1.027909,-0.484686,-0.24158\C,0,-2.306124,  
0.057948,0.078063\C,0,-0.982934,-1.830845,-0.671224\C,0,-3.45413,-0.71  
8037,-0.062086\C,0,-2.135486,-2.592521,-0.793035\H,0,-0.020528,-2.2645  
94,-0.958279\C,0,-3.383068,-2.040238,-0.495179\H,0,-4.422594,-0.274247  
,0.193669\H,0,-2.063697,-3.626021,-1.144888\H,0,-4.29323,-2.637866,-0.  
596801\C,0,-0.037906,1.794394,-0.392129\C,0,0.427545,2.760861,-1.42547  
9\C,0,0.798374,2.94391,0.01968\H,0,1.835558,2.750842,0.3251\H,0,0.3234  
55,3.764312,0.576325\H,0,-0.313173,3.443617,-1.863425\H,0,1.201154,2.4  
52124,-2.140418\C,0,-2.378221,1.440367,0.603592\H,0,-3.315887,1.974206  
,0.352814\O,0,-2.025648,1.498468,1.941112\H,0,-1.378124,1.950281,-0.05  
1605\H,0,-1.998038,2.422116,2.217105\\Version=ES64L-G16RevA.03\State=3  
-A\HF=-732.2426193\S2=2.031326\S2-1=0.\S2A=2.000625\RMSD=7.900e-09\Dip  
ole=-0.1566856,0.8148417,-0.2220208\Quadrupole=3.6447767,5.0736961,-8.  
7184728,-3.7114693,-0.7023492,1.0740496\PG=C01 [X(C17H16O1)]\@

## Int-2a

1\1\GINC-B2173\SP\RM06\def2TZVPP\C17H16O1\ROOT\23-Mar-2023\0\#\p scrf=  
(iefpcm,smd,solvent=Acetonitrile) M06 def2tzvpp\\int3\\0,1\C,0,1.54550  
1,-0.522853,-1.255962\C,0,1.257197,0.365071,-0.210623\C,0,2.319545,0.8  
07108,0.590507\C,0,3.61849,0.356289,0.375916\C,0,3.886185,-0.540929,-0  
.656232\C,0,2.843534,-0.973821,-1.475022\H,0,0.729898,-0.856062,-1.906  
14\H,0,2.11102,1.492554,1.419213\H,0,4.429469,0.707996,1.021288\H,0,4.  
907455,-0.892291,-0.831341\H,0,3.046296,-1.66041,-2.302796\C,0,-0.1266  
91,0.855595,0.005389\C,0,-1.176686,-0.025512,0.117112\C,0,-0.995624,-1  
.488475,0.297439\C,0,-2.577644,0.367097,-0.005496\C,0,-1.997273,-2.369  
404,-0.282021\C,0,-3.534293,-0.516543,-0.383987\H,0,-2.868445,1.408224  
,0.136807\C,0,-3.220212,-1.903131,-0.623709\H,0,-1.764155,-3.437802,-0  
.360716\H,0,-4.562156,-0.169154,-0.527065\H,0,-3.984651,-2.57516,-1.02

3195\C,0,-0.203254,2.348599,-0.00294\C,0,-1.171902,3.186717,0.788485\C,0,-1.251386,3.18275,-0.699905\H,0,-2.077154,2.661685,-1.191666\H,0,-0.901013,4.067289,-1.240649\H,0,-0.776032,4.076794,1.287316\H,0,-1.940965,2.664965,1.36616\C,0,-0.061317,-2.080271,1.087432\H,0,0.794821,2.793689,-0.078029\H,0,-0.028717,-3.177753,1.136648\O,0,0.818618,-1.419504,1.850622\H,0,1.410372,-2.038252,2.290902\\Version=ES64L-G16RevA.03\State=1-A\HF=-732.3107516\RMSD=7.442e-09\Dipole=0.7250124,-0.7213111,0.6476335\Quadrupole=-1.026256,5.8711189,-4.8448629,-3.8217098,4.6550977,-1.5022602\PG=C01 [X(C17H16O1)]\@

### Int-3a

1\1\GINC-B2173\SP\RM06\def2TZVPP\C17H16O1\ROOT\23-Mar-2023\0\#\#p scrf=(iefpcm,smd,solvent=Acetonitrile) M06 def2tzvpp\\int3\\0,1\C,0,1.545501,-0.522853,-1.255962\C,0,1.257197,0.365071,-0.210623\C,0,2.319545,0.807108,0.590507\C,0,3.61849,0.356289,0.375916\C,0,3.886185,-0.540929,-0.656232\C,0,2.843534,-0.973821,-1.475022\H,0,0.729898,-0.856062,-1.90614\H,0,2.11102,1.492554,1.419213\H,0,4.429469,0.707996,1.021288\H,0,4.907455,-0.892291,-0.831341\H,0,3.046296,-1.66041,-2.302796\C,0,-0.126691,0.855595,0.005389\C,0,-1.176686,-0.025512,0.117112\C,0,-0.995624,-1.488475,0.297439\C,0,-2.577644,0.367097,-0.005496\C,0,-1.997273,-2.369404,-0.282021\C,0,-3.534293,-0.516543,-0.383987\H,0,-2.868445,1.408224,0.136807\C,0,-3.220212,-1.903131,-0.623709\H,0,-1.764155,-3.437802,-0.360716\H,0,-4.562156,-0.169154,-0.527065\H,0,-3.984651,-2.57516,-1.023195\C,0,-0.203254,2.348599,-0.00294\C,0,-1.171902,3.186717,0.788485\C,0,-1.251386,3.18275,-0.699905\H,0,-2.077154,2.661685,-1.191666\H,0,-0.901013,4.067289,-1.240649\H,0,-0.776032,4.076794,1.287316\H,0,-1.940965,2.664965,1.36616\C,0,-0.061317,-2.080271,1.087432\H,0,0.794821,2.793689,-0.078029\H,0,-0.028717,-3.177753,1.136648\O,0,0.818618,-1.419504,1.850622\H,0,1.410372,-2.038252,2.290902\\Version=ES64L-G16RevA.03\State=1-A\HF=-732.3107516\RMSD=7.442e-09\Dipole=0.7250124,-0.7213111,0.6476335\Quadrupole=-1.026256,5.8711189,-4.8448629,-3.8217098,4.6550977,

-1.5022602\PG=C01 [X(C17H16O1)]\@

### Ts-2a

1\1\GINC-B2153\SP\RM06\def2TZVPP\C17H16O1\ROOT\23-Mar-2023\0\#\#p scrf=(iefpcm,smd,solvent=Acetonitrile) M06 def2tzvpp\ts2\0,1\C,0,1.840419,-1.232778,0.747509\C,0,1.548131,0.007253,0.14539\C,0,2.626059,0.723727,-0.403285\C,0,3.923117,0.217112,-0.368165\C,0,4.186324,-1.01904,0.21538\C,0,3.132238,-1.741873,0.775425\H,0,1.028686,-1.797032,1.220148\H,0,2.444401,1.690709,-0.879449\H,0,4.73896,0.798031,-0.809505\H,0,5.205762,-1.414425,0.241982\H,0,3.322707,-2.707671,1.253573\C,0,0.167852,0.538196,0.173234\C,0,-0.924625,-0.352742,-0.108531\C,0,-2.225685,-0.14799,0.488527\C,0,-0.795082,-1.506775,-0.935004\C,0,-3.335353,-0.962488,0.115834\C,0,-1.883984,-2.268832,-1.282212\H,0,0.185907,-1.729421,-1.3654\C,0,-3.179461,-1.99015,-0.772209\H,0,-4.309206,-0.760445,0.576254\H,0,-1.753573,-3.095783,-1.987202\H,0,-4.031035,-2.606753,-1.070783\C,0,0.026921,1.995618,-0.188231\C,0,-1.205861,2.5936,-0.784319\C,0,-0.004584,2.393918,-1.646127\H,0,-0.029665,1.570111,-2.369515\H,0,0.573264,3.266679,-1.969169\H,0,-1.460774,3.613417,-0.480376\H,0,-2.076926,1.954064,-0.958286\C,0,-2.29149,0.596809,1.675879\H,0,0.600285,2.675904,0.458634\H,0,-0.431541,0.932958,1.530602\H,0,-3.188487,0.517213,2.313932\O,0,-1.306049,1.253883,2.15\Version=ES64L-G16RevA.03\State=1-A\HF=-732.306983\RMSD=6.346e-09\Dipole=-1.2279223,-0.3269,-0.1528412\Quadrupole=5.611882,0.5511522,-6.1630342,2.3814376,-3.5064287,-0.6692986\PG=C01 [X(C17H16O1)]\@

### Ts-3a

1\1\GINC-B2135\SP\RM06\def2TZVPP\C17H16O1\ROOT\29-Mar-2023\0\#\#p def2tzvpp m06 scrf=(iefpcm,smd,solvent=Acetonitrile)\ts3\0,1\C,0,1.269061,-1.220736,-0.892119\C,0,1.233879,0.080501,-0.352183\C,0,2.466124,0.66695,-0.003465\C,0,3.666516,-0.017897,-0.16652\C,0,3.679993,-1.310445,-



0.686161\C,0,2.469362,-1.90269,-1.047361\H,0,0.33363,-1.69514,-1.20771  
3\H,0,2.477013,1.676894,0.420514\H,0,4.605384,0.466884,0.120076\H,0,4.  
62325,-1.848074,-0.817748\H,0,2.460296,-2.910758,-1.47376\C,0,-0.01946  
8,0.839276,-0.189802\C,0,-1.293924,0.168315,-0.286932\C,0,-1.368876,-0  
.787133,0.747879\C,0,-2.332213,0.240421,-1.235442\C,0,-2.241419,-1.888  
934,0.669722\C,0,-3.259389,-0.788426,-1.25216\H,0,-2.346587,1.024019,-  
2.000199\C,0,-3.189278,-1.865801,-0.336754\H,0,-2.209375,-2.692827,1.4  
11264\H,0,-4.039193,-0.798669,-2.020025\H,0,-3.919835,-2.676572,-0.415  
039\C,0,0.080147,2.308763,-0.411232\C,0,0.000524,3.275972,0.750756\C,0  
, -1.108725,3.207129,-0.239786\H,0,-2.049421,2.746794,0.080685\H,0,-1.2  
3168,4.0339,-0.94572\H,0,0.669372,4.142622,0.741738\H,0,-0.175955,2.85  
727,1.747701\C,0,-0.446361,-0.384443,1.750135\H,0,-0.503436,0.623785,2  
.169044\O,0,0.269031,-1.297863,2.411471\H,0,0.715418,-0.901337,3.16965  
9\H,0,0.803148,2.609173,-1.183697\\Version=ES64L-G16RevA.03\State=1-A\  
HF=-732.2932348\RMSD=4.962e-09\Dipole=-0.3163795,0.7017269,1.2441033\Q  
uadrupole=-3.080414,-0.4476268,3.5280408,2.6507993,4.7016802,0.3587966  
\PG=C01 [X(C17H16O1)]\@

## 2a

1\1\GINC-B2153\SP\RM06\def2TZVPP\C17H16O1\ROOT\23-Mar-2023\0\#\#p scrf=  
(iefpcm,smd,solvent=Acetonitrile) M06 def2tzvpp\\2b\\0,1\C,0,1.929907,  
-0.882082,1.189316\C,0,1.569318,0.169622,0.336226\C,0,2.53295,0.666437  
, -0.544547\C,0,3.818775,0.123824,-0.575131\C,0,4.161538,-0.922766,0.27  
4462\C,0,3.208717,-1.425642,1.161214\H,0,1.18228,-1.277303,1.887606\H,  
0,2.277939,1.488432,-1.219672\H,0,4.559278,0.52774,-1.272157\H,0,5.169  
958,-1.345909,0.250537\H,0,3.46767,-2.244734,1.838843\C,0,0.155162,0.7  
1085,0.416391\C,0,-0.857574,-0.307457,-0.070809\C,0,-2.120522,-0.48669  
8,0.542123\C,0,-0.56053,-1.09672,-1.186256\C,0,-3.019482,-1.431953,0.0  
26187\C,0,-1.468454,-2.021254,-1.696737\H,0,0.420635,-0.98802,-1.66034  
6\C,0,-2.709732,-2.195663,-1.089916\H,0,-3.986423,-1.558631,0.526611\H

, 0, -1.198018, -2.615261, -2.574667\H, 0, -3.424725, -2.924085, -1.48119\C, 0, -0.005282, 2.068548, -0.252419\C, 0, -1.320072, 2.600642, -0.7172\C, 0, -0.268041, 2.241041, -1.71902\H, 0, -0.435624, 1.342054, -2.323582\H, 0, 0.25518, 3.043437, -2.249517\H, 0, -1.538916, 3.65702, -0.536903\H, 0, -2.197786, 1.948319, -0.654421\C, 0, -2.595961, 0.247211, 1.738228\H, 0, 0.667073, 2.815104, 0.190814\H, 0, -0.057794, 0.884849, 1.48352\H, 0, -3.611138, -0.105463, 2.074286\O, 0, -2.031736, 1.125602, 2.340948\\Version=ES64L-G16RevA.03\State=1-A\HF=-732.3689482\RMSD=3.954e-09\Dipole=-0.3939918, -1.0252717, -1.0721315\Quadrupole=5.6349364, -0.2730597, -5.3618767, 5.434219, 0.1236291, -3.3179892\PG=C01 [X(C17H16O1)]\\@

### 3a

1\1\GINC-B2131\SP\RM06\def2TZVPP\C17H16O1\ROOT\03-Apr-2023\0\#\#p scrf=(iefpcm,smd,solvent=Acetonitrile) M06 def2tzvpp\\int1\\0,1\C, 0, -1.557372, -0.931742, 1.100714\C, 0, -1.374192, -0.022223, 0.057576\C, 0, -2.495843, 0.354472, -0.695357\C, 0, -3.75751, -0.161246, -0.4158\C, 0, -3.925839, -1.062348, 0.634559\C, 0, -2.821639, -1.443273, 1.390853\H, 0, -0.694621, -1.25198, 1.69266\H, 0, -2.382152, 1.075082, -1.515609\H, 0, -4.617129, 0.145748, -1.019104\H, 0, -4.91654, -1.46692, 0.860513\H, 0, -2.941419, -2.15181, 2.215848\C, 0, -0.024842, 0.553739, -0.287861\C, 0, 1.193967, -0.101296, 0.343825\C, 0, 1.698347, -0.556781, -0.867083\C, 0, 1.865203, -0.307062, 1.542462\C, 0, 2.887376, -1.2621, -0.966079\C, 0, 3.070255, -1.01521, 1.458903\H, 0, 1.489296, 0.041899, 2.510269\C, 0, 3.568093, -1.482688, 0.236538\H, 0, 3.282264, -1.633933, -1.915606\H, 0, 3.639308, -1.215244, 2.372095\H, 0, 4.512553, -2.035468, 0.228189\C, 0, -0.045437, 2.069306, -0.213721\C, 0, 1.20571, 2.865738, -0.009265\C, 0, 0.188975, 2.766737, 1.08664\H, 0, 0.434978, 2.142677, 1.953617\H, 0, -0.416417, 3.6452, 1.328568\H, 0, 1.303697, 3.816056, -0.542639\H, 0, 2.148731, 2.322502, 0.119203\C, 0, 0.559702, 0.003219, -1.676791\H, 0, 0.848676, 0.848066, -2.341565\O, 0, -0.161394, -0.975238, -2.347649\H, 0, -1.014536, -0.611389, -2.613731\H, 0, -0.795265, 2.527959, -0.872194\\Version=ES64L-G16RevA.03\State=1-A\HF=-

732.3368942\RMSD=4.450e-09\Dipole=-0.2844837,0.7514912,0.0332811\Quadrupole=4.0238943,-4.7762762,0.752382,-2.300155,3.5517738,-5.8658127\PG=C01 [X(C17H16O1)]\@

## 1b

1\1\GINC-A01R04N01\SP\RM06\def2TZVPP\C15H14O1\ACJSGGHI7X\05-May-2023\0  
\#p scrf=(iefpcm,smd,solvent=Acetonitrile) M06 def2tzvpp\1\0,1\C,0,  
-1.563191,-0.201725,-1.028959\C,0,-1.605906,0.096395,0.341459\C,0,-2.8  
63015,0.202892,0.956159\C,0,-4.033076,0.040411,0.223467\C,0,-3.974713,  
-0.236553,-1.142175\C,0,-2.734836,-0.358291,-1.764196\H,0,-0.592274,-0  
.305299,-1.524952\H,0,-2.922044,0.392809,2.032262\H,0,-5.001964,0.1194  
11,0.725419\H,0,-2.676921,-0.58161,-2.833509\C,0,-0.35013,0.300287,1.1  
01624\C,0,0.879062,-0.367681,0.582937\C,0,1.905377,0.365824,-0.037376\  
C,0,0.999147,-1.755751,0.698038\C,0,3.032135,-0.307777,-0.513981\C,0,2  
.129354,-2.417923,0.228556\H,0,0.183184,-2.316967,1.16681\C,0,3.148061  
, -1.688536,-0.37906\H,0,3.815634,0.273807,-1.005043\H,0,2.211253,-3.50  
3665,0.333031\H,0,4.038697,-2.198601,-0.758042\C,0,-0.288351,1.047223,  
2.214908\C,0,1.785616,1.856063,-0.203679\H,0,1.854172,2.339714,0.79454  
8\O,0,2.778159,2.324458,-1.07005\H,0,2.711947,3.282128,-1.121518\H,0,-  
1.15974,1.578214,2.610639\H,0,0.652342,1.152536,2.765113\H,0,0.762999,  
2.090501,-0.573327\H,0,-4.895758,-0.367784,-1.717369\Version=ES64L-G1  
6RevC.01\State=1-A\HF=-654.989248\RMSD=6.427e-09\Dipole=-0.5342839,0.6  
870356,0.2145184\Quadrupole=-0.8489455,3.2000785,-2.3511331,1.2323526,  
-0.0945339,1.5543305\PG=C01 [X(C15H14O1)]\@

## Int-1b

1\1\GINC-A01R04N04\SP\UM06\def2TZVPP\C15H14O1(3)\ACJSGGHI7X\05-May-202  
3\0\#p scrf=(iefpcm,smd,solvent=Acetonitrile) M06 def2tzvpp\int1\0,  
3\C,0,-1.931397,0.809392,0.75165\C,0,-1.666058,-0.264481,-0.136019\C,0  
, -2.78179,-1.000069,-0.609468\C,0,-4.077077,-0.661908,-0.249135\C,0,-4  
.313628,0.411088,0.613246\C,0,-3.229121,1.135674,1.11482\H,0,-1.095208

,1.36917,1.179724\H,0,-2.607751,-1.846147,-1.283507\H,0,-4.91683,-1.24  
2314,-0.64306\H,0,-3.400849,1.963124,1.809894\C,0,-0.328499,-0.657192,  
-0.504821\C,0,0.826643,0.234196,-0.351616\C,0,2.098985,-0.234331,0.064  
811\C,0,0.70119,1.59801,-0.686386\C,0,3.168884,0.654938,0.144423\C,0,1  
.778938,2.470527,-0.611876\H,0,-0.266058,1.963522,-1.044605\C,0,3.0196  
71,1.998865,-0.191083\H,0,4.131459,0.273069,0.49137\H,0,1.649544,3.519  
94,-0.892356\H,0,3.875805,2.67643,-0.123558\C,0,-0.135098,-1.948791,-1  
.174702\C,0,2.302949,-1.669592,0.460611\H,0,2.226906,-2.304095,-0.4509  
02\O,0,3.538414,-1.830486,1.094836\H,0,3.66914,-2.765482,1.276009\H,0,  
-0.172042,-2.900107,-0.628219\H,0,-0.131245,-2.014754,-2.271707\H,0,1.  
45748,-1.980436,1.113572\H,0,-5.335217,0.674022,0.901919\\Version=ES64  
L-G16RevC.01\State=3-A\HF=-654.9073129\S2=2.036553\S2-1=0.\S2A=2.00081  
7\RMSD=9.073e-09\Dipole=-0.3971991,-0.8788425,-0.1409607\Quadrupole=-1  
.7417965,7.5025552,-5.7607587,-3.3337276,0.1571418,0.964926\PG=C01 [X(  
C15H14O1)]\@

## Int-1b

1\1\GINC-A01R04N04\SP\UM06\def2TZVPP\C15H14O1(3)\ACJSGGHI7X\05-May-202  
3\0\#p scrf=(iefpcm,smd,solvent=Acetonitrile) M06 def2tzvpp\int1\0,  
3\C,0,-1.931397,0.809392,0.75165\C,0,-1.666058,-0.264481,-0.136019\C,0  
, -2.78179,-1.000069,-0.609468\C,0,-4.077077,-0.661908,-0.249135\C,0,-4  
.313628,0.411088,0.613246\C,0,-3.229121,1.135674,1.11482\H,0,-1.095208  
,1.36917,1.179724\H,0,-2.607751,-1.846147,-1.283507\H,0,-4.91683,-1.24  
2314,-0.64306\H,0,-3.400849,1.963124,1.809894\C,0,-0.328499,-0.657192,  
-0.504821\C,0,0.826643,0.234196,-0.351616\C,0,2.098985,-0.234331,0.064  
811\C,0,0.70119,1.59801,-0.686386\C,0,3.168884,0.654938,0.144423\C,0,1  
.778938,2.470527,-0.611876\H,0,-0.266058,1.963522,-1.044605\C,0,3.0196  
71,1.998865,-0.191083\H,0,4.131459,0.273069,0.49137\H,0,1.649544,3.519  
94,-0.892356\H,0,3.875805,2.67643,-0.123558\C,0,-0.135098,-1.948791,-1  
.174702\C,0,2.302949,-1.669592,0.460611\H,0,2.226906,-2.304095,-0.4509

02\O,0,3.538414,-1.830486,1.094836\H,0,3.66914,-2.765482,1.276009\H,0,  
-0.172042,-2.900107,-0.628219\H,0,-0.131245,-2.014754,-2.271707\H,0,1.  
45748,-1.980436,1.113572\H,0,-5.335217,0.674022,0.901919\\Version=ES64  
L-G16RevC.01\State=3-A\HF=-654.9073129\S2=2.036553\S2-1=0.\S2A=2.00081  
7\RMSD=9.073e-09\Dipole=-0.3971991,-0.8788425,-0.1409607\Quadrupole=-1  
.7417965,7.5025552,-5.7607587,-3.3337276,0.1571418,0.964926\PG=C01 [X(  
C15H14O1)]\@

### Ts-1b

1\1\GINC-A01R04N04\SP\UM06\def2TZVPP\C15H14O1(3)\ACJSGGHI7X\05-May-202  
3\0\#p scrf=(iefpcm,smd,solvent=Acetonitrile) M06 def2tzvpp\ts1\0,3  
\C,0,-2.04536,0.818862,0.738121\C,0,-1.661448,-0.278469,-0.071017\C,0,  
-2.700306,-1.052261,-0.641188\C,0,-4.03519,-0.730379,-0.441652\C,0,-4.  
388435,0.364019,0.349736\C,0,-3.381825,1.129726,0.942383\H,0,-1.273029  
,1.40877,1.240238\H,0,-2.437651,-1.907663,-1.271756\H,0,-4.813602,-1.3  
39762,-0.910809\H,0,-3.64574,1.975943,1.584013\C,0,-0.276989,-0.647953  
, -0.26942\C,0,0.820185,0.298938,-0.167044\C,0,2.12684,-0.153587,0.1765  
49\C,0,0.673518,1.662078,-0.511522\C,0,3.215013,0.716885,0.120677\C,0,  
1.760441,2.522018,-0.54033\H,0,-0.31014,2.028199,-0.81939\C,0,3.039837  
,2.05183,-0.229746\H,0,4.205316,0.328496,0.373949\H,0,1.615521,3.56633  
1,-0.83232\H,0,3.899012,2.728037,-0.261499\C,0,0.061537,-2.033871,-0.6  
68164\C,0,2.291297,-1.555405,0.611508\O,0,3.568746,-2.036384,0.436965\  
H,0,3.664298,-2.865411,0.916682\H,0,0.263857,-2.206355,-1.739099\H,0,1  
.369743,-2.123443,-0.097198\H,0,-0.5143,-2.847921,-0.205953\H,0,1.8730  
07,-1.742131,1.622619\H,0,-5.440965,0.613383,0.51145\\Version=ES64L-G1  
6RevC.01\State=3-A\HF=-654.8891648\S2=2.03225\S2-1=0.\S2A=2.000655\RMS  
D=6.286e-09\Dipole=-0.0472013,-0.7399848,0.5260634\Quadrupole=-0.51815  
19,5.863523,-5.3453712,-3.3552396,3.8909293,-1.4023043\PG=C01 [X(C15H1  
4O1)]\@

## Ts-1b

1\1\GINC-A01R04N04\SP\UM06\def2TZVPP\C15H14O1(3)\ACJSGGHI7X\05-May-2023\0\#\#p scrf=(iefpcm,smd,solvent=Acetonitrile) M06 def2tzvpp\ts1\0,3\C,0,-2.04536,0.818862,0.738121\C,0,-1.661448,-0.278469,-0.071017\C,0,-2.700306,-1.052261,-0.641188\C,0,-4.03519,-0.730379,-0.441652\C,0,-4.388435,0.364019,0.349736\C,0,-3.381825,1.129726,0.942383\H,0,-1.273029,1.40877,1.240238\H,0,-2.437651,-1.907663,-1.271756\H,0,-4.813602,-1.339762,-0.910809\H,0,-3.64574,1.975943,1.584013\C,0,-0.276989,-0.647953,-0.26942\C,0,0.820185,0.298938,-0.167044\C,0,2.12684,-0.153587,0.176549\C,0,0.673518,1.662078,-0.511522\C,0,3.215013,0.716885,0.120677\C,0,1.760441,2.522018,-0.54033\H,0,-0.31014,2.028199,-0.81939\C,0,3.039837,2.05183,-0.229746\H,0,4.205316,0.328496,0.373949\H,0,1.615521,3.566331,-0.83232\H,0,3.899012,2.728037,-0.261499\C,0,0.061537,-2.033871,-0.668164\C,0,2.291297,-1.555405,0.611508\O,0,3.568746,-2.036384,0.436965\H,0,3.664298,-2.865411,0.916682\H,0,0.263857,-2.206355,-1.739099\H,0,1.369743,-2.123443,-0.097198\H,0,-0.5143,-2.847921,-0.205953\H,0,1.873007,-1.742131,1.622619\H,0,-5.440965,0.613383,0.51145\Version=ES64L-G16RevC.01\State=3-A\HF=-654.8891648\S2=2.03225\S2-1=0.\S2A=2.000655\RMSD=6.286e-09\Dipole=-0.0472013,-0.7399848,0.5260634\Quadrupole=-0.5181519,5.863523,-5.3453712,-3.3552396,3.8909293,-1.4023043\PG=C01 [X(C15H14O1)]\@

## Int-2b

1\1\GINC-A01R04N01\SP\UM06\def2TZVPP\C15H14O1(3)\ACJSGGHI7X\05-May-2023\0\#\#p scrf=(iefpcm,smd,solvent=Acetonitrile) M06 def2tzvpp\int1\0,3\C,0,-1.427792,0.415763,-1.047064\C,0,-1.462583,-0.477854,0.05781\C,0,-2.733952,-0.741812,0.63362\C,0,-3.884983,-0.144204,0.142417\C,0,-3.823109,0.733851,-0.942731\C,0,-2.584337,1.003817,-1.532698\H,0,-0.46766,0.623208,-1.5296\H,0,-2.811228,-1.421258,1.487246\H,0,-4.848821,-0.364619,0.611523\H,0,-2.524644,1.680846,-2.390322\C,0,-0.271912,-1.087788

,0.56264\C,0,1.064272,-0.702707,0.054369\C,0,1.609155,0.602306,0.29436  
3\C,0,1.835415,-1.636339,-0.63336\C,0,2.906634,0.895879,-0.204734\C,0,  
3.111442,-1.330135,-1.116355\H,0,1.414267,-2.633846,-0.80478\C,0,3.637  
564,-0.053406,-0.897506\H,0,3.321689,1.88981,-0.017985\H,0,3.687985,-2  
.083832,-1.659758\H,0,4.635438,0.198111,-1.269585\C,0,-0.34459,-2.1550  
44,1.607448\C,0,0.891115,1.566473,1.024879\H,0,-0.102056,1.366305,1.44  
0722\O,0,1.446261,2.775371,1.252002\H,0,0.823909,3.334742,1.727488\H,0  
, -1.066949,-2.949674,1.347034\H,0,0.63741,-2.624187,1.765343\H,0,-0.66  
9807,-1.752228,2.586808\H,0,-4.733655,1.200857,-1.32874\\Version=ES64L  
-G16RevC.01\State=3-A\HF=-654.9396309\S2=2.054035\S2-1=0.\S2A=2.001816  
\RMSD=8.144e-09\Dipole=-0.7203345,0.3437949,0.8125015\Quadrupole=-2.48  
43459,3.6415651,-1.1572192,-2.1535501,-3.5624668,1.3680499\PG=C01 [X(C  
15H14O1)]\@

### Int-3b

1\1\GINC-A01R04N04\SP\RM06\def2TZVPP\C15H14O1\ACJSGGHI7X\05-May-2023\  
\#p scrf=(iefpcm,smd,solvent=Acetonitrile) M06 def2tzvpp\\int1\\0,1\C  
,0,-2.132394,0.182339,1.153341\C,0,-1.6615,-0.366392,-0.049503\C,0,-2.  
588176,-0.575644,-1.081971\C,0,-3.927953,-0.2335,-0.925701\C,0,-4.3777  
84,0.314125,0.274575\C,0,-3.473345,0.519759,1.314238\H,0,-1.424223,0.3  
38893,1.974203\H,0,-2.24497,-0.994913,-2.034104\H,0,-4.627901,-0.39276  
9,-1.751525\H,0,-3.815955,0.942056,2.263756\C,0,-0.237313,-0.758365,-0  
.199234\C,0,0.7759,0.160915,-0.042519\C,0,2.218717,-0.168084,0.014258\  
C,0,0.476402,1.58733,-0.03888\C,0,3.183383,0.866135,-0.318417\C,0,1.43  
0177,2.529001,-0.235224\H,0,-0.5699,1.894811,0.029551\C,0,2.810491,2.1  
61228,-0.427224\H,0,4.231247,0.571898,-0.417627\H,0,1.144293,3.583803,  
-0.289391\H,0,3.551975,2.935828,-0.643046\C,0,-0.024501,-2.199732,-0.5  
43923\C,0,2.683553,-1.359867,0.479055\H,0,2.016057,-2.129512,0.877383\  
O,0,4.004153,-1.62462,0.540954\H,0,4.146114,-2.493731,0.928139\H,0,-0.  
839587,-2.566591,-1.188712\H,0,0.936059,-2.368237,-1.059292\H,0,-0.038

512,-2.858396,0.346349\H,0,-5.431856,0.578345,0.39947\\Version=ES64L-G  
16RevC.01\State=1-A\HF=-654.9606367\RMSD=5.994e-09\Dipole=0.17014,-1.3  
572807,0.4558334\Quadrupole=1.1224865,3.4406814,-4.5631679,-8.4372924,  
3.2479443,-1.5211806\PG=C01 [X(C15H14O1)]\\@

### Ts-2b

1\1\GINC-A01R02N08\SP\RM06\def2TZVPP\C15H14O1\ACJSGGHI7X\05-May-2023\  
\#p scrf=(iefpcm,smd,solvent=Acetonitrile) M06 def2tzvpp\\ts2\\0,1\C,  
0,1.718359,-0.725825,0.921834\C,0,1.486605,0.20706,-0.109579\C,0,2.605  
956,0.638582,-0.843326\C,0,3.880658,0.143041,-0.579789\C,0,4.081882,-0  
.79588,0.427745\C,0,2.987949,-1.225199,1.180457\H,0,0.87771,-1.046332,  
1.546984\H,0,2.483101,1.372288,-1.644527\H,0,4.728237,0.497188,-1.1746  
93\H,0,3.129566,-1.947162,1.99064\C,0,0.133839,0.752748,-0.335743\C,0,  
-1.006819,-0.115142,-0.254527\C,0,-2.297949,0.41428,0.129727\C,0,-0.95  
6683,-1.520046,-0.489185\C,0,-3.467741,-0.400245,0.067117\C,0,-2.10074  
3,-2.277747,-0.544166\H,0,0.009453,-1.974647,-0.726393\C,0,-3.380736,-  
1.716958,-0.288188\H,0,-4.430927,0.046399,0.339151\H,0,-2.02664,-3.334  
808,-0.818328\H,0,-4.275449,-2.341517,-0.350566\C,0,0.026085,1.935331,  
-1.286406\C,0,-2.316508,1.574074,0.918118\H,0,-3.228515,1.824531,1.486  
475\O,0,-1.284936,2.292824,1.144048\H,0,-0.43299,1.685925,0.741689\H,0  
,0.578597,2.823055,-0.931591\H,0,0.436714,1.670444,-2.278192\H,0,-1.01  
8047,2.236331,-1.45203\H,0,5.083746,-1.182736,0.634476\\Version=ES64L-  
G16RevC.01\State=1-A\HF=-654.9473878\RMSD=7.318e-09\Dipole=-1.2612361,  
-0.3635929,-0.0409423\Quadrupole=6.6608312,-2.1245686,-4.5362625,-0.40  
7443,-2.9125702,-2.336493\PG=C01 [X(C15H14O1)]\\@

### Ts-3b

1\1\GINC-A02R04N06\SP\RM06\def2TZVPP\C15H14O1\ACJSGGHI7X\05-May-2023\  
\#p scrf=(iefpcm,smd,solvent=Acetonitrile) M06 def2tzvpp\\ts3\\0,1\C,  
0,-1.762079,-0.846679,-0.805827\C,0,-1.520117,0.113588,0.200944\C,0,-2



.6451,0.714766,0.803981\C,0,-3.936649,0.356624,0.435204\C,0,-4.151392,  
-0.608083,-0.548303\C,0,-3.053373,-1.206906,-1.16735\H,0,-0.907853,-1.  
302955,-1.318011\H,0,-2.505423,1.467351,1.5847\H,0,-4.78984,0.834995,0  
.925999\H,0,-3.207549,-1.956075,-1.949952\C,0,-0.15427,0.491828,0.5413  
96\C,0,0.943765,-0.410542,0.267613\C,0,2.003963,0.323977,-0.308472\C,0  
,1.127444,-1.778341,0.545096\C,0,3.330619,-0.155438,-0.281344\C,0,2.41  
4553,-2.285433,0.471332\H,0,0.299331,-2.39571,0.909282\C,0,3.511912,-1  
.469478,0.104382\H,0,4.166512,0.467166,-0.614216\H,0,2.600926,-3.32679  
3,0.751633\H,0,4.516972,-1.902421,0.102337\C,0,0.04214,1.575383,1.5698  
69\C,0,1.436128,1.476259,-0.903442\O,0,2.11493,2.632137,-0.943313\H,0,  
1.721413,3.232661,-1.588152\H,0,-0.405204,1.281988,2.541279\H,0,1.1082  
57,1.772835,1.752463\H,0,-0.431324,2.532077,1.283656\H,0,0.558056,1.37  
5776,-1.548726\H,0,-5.168969,-0.887128,-0.836258\\Version=ES64L-G16Rev  
C.01\State=1-A\HF=-654.9339223\RMSD=2.105e-09\Dipole=-0.0606505,0.8405  
196,-0.8086397\Quadrupole=-1.6572914,3.8564963,-2.1992049,0.2143846,-2  
.2348861,-3.3663866\PG=C01 [X(C15H14O1)]\@

## 2b

1\1\GINC-A01R04N01\SP\RM06\def2TZVPP\C15H14O1\ACJSGGHI7X\05-May-2023\  
\#p scrf=(iefpcm,smd,solvent=Acetonitrile) M06 def2tzvpp\\int1\\0,1\C  
,0,1.83884,-0.152038,-1.294389\C,0,1.588615,-0.505919,0.038213\C,0,2.6  
2515,-0.370698,0.963906\C,0,3.876103,0.108255,0.570009\C,0,4.109827,0.  
456867,-0.755613\C,0,3.082727,0.32358,-1.690822\H,0,1.031479,-0.250054  
, -2.030143\H,0,2.466405,-0.639925,2.012189\H,0,4.674492,0.206761,1.311  
547\H,0,3.255137,0.59159,-2.73735\C,0,0.206139,-1.007459,0.404814\C,0,  
-0.847613,0.080027,0.25321\C,0,-2.159115,-0.183654,-0.194083\C,0,-0.53  
6987,1.388649,0.640058\C,0,-3.102443,0.853064,-0.262808\C,0,-1.482002,  
2.406722,0.577959\H,0,0.476387,1.613024,0.989815\C,0,-2.773494,2.14332  
6,0.11924\H,0,-4.103133,0.599203,-0.624962\H,0,-1.205638,3.419194,0.88  
7051\H,0,-3.515807,2.944251,0.063895\C,0,0.106863,-1.618264,1.798054\C

,0,-2.624693,-1.530863,-0.600054\O,0,-3.743601,-1.772887,-0.980414\H,0  
,0.264779,-0.855834,2.579603\H,0,-0.896382,-2.042402,1.962554\H,0,0.84  
6317,-2.422138,1.943495\H,0,-1.866857,-2.354094,-0.532445\H,0,-0.01651  
6,-1.806522,-0.324826\H,0,5.090633,0.830467,-1.063273\\Version=ES64L-G  
16RevC.01\State=1-A\HF=-655.0113348\RMSD=7.388e-09\Dipole=1.3000127,0.  
6665061,0.6590625\Quadrupole=-6.6292011,3.3934851,3.235716,-6.1009573,  
-2.5350801,-1.8525623\PG=C01 [X(C15H14O1)]\@

### 3b

1\1\GINC-A01R08N05\SP\RM06\def2TZVPP\C15H14O1\ACJSGGHI7X\05-May-2023\  
\#p scrf=(iefpcm,smd,solvent=Acetonitrile) M06 def2tzvpp\\3-3\\0,1\C,  
0,-1.476874,-1.047987,-0.673833\C,0,-1.389201,0.084933,0.149364\C,0,-2  
.57948,0.615516,0.65914\C,0,-3.812469,0.039471,0.355234\C,0,-3.882088,  
-1.08118,-0.466481\C,0,-2.7053,-1.623521,-0.980878\H,0,-0.558295,-1.49  
1155,-1.075335\H,0,-2.553502,1.493135,1.310868\H,0,-4.727657,0.472456,  
0.770337\H,0,-2.744153,-2.507869,-1.62399\C,0,-0.039324,0.708216,0.419  
28\C,0,1.135755,-0.255448,0.494511\C,0,1.822352,0.32278,-0.565229\C,0,  
1.637236,-1.337682,1.201591\C,0,3.07985,-0.107261,-0.961635\C,0,2.9029  
44,-1.788148,0.807368\H,0,1.097378,-1.816611,2.024322\C,0,3.609386,-1.  
184001,-0.240977\H,0,3.636957,0.351752,-1.783207\H,0,3.360993,-2.63196  
5,1.333014\H,0,4.598767,-1.572057,-0.502357\C,0,0.706272,1.279692,-0.8  
88111\O,0,1.058016,2.622915,-0.915063\H,0,0.297977,3.13599,-1.211371\H  
,0,0.148046,0.981325,-1.801221\C,0,-0.027837,1.730505,1.539879\H,0,-0.  
664396,2.599917,1.303234\H,0,-0.386234,1.289755,2.484863\H,0,0.991744,  
2.111274,1.698654\H,0,-4.849085,-1.534572,-0.702639\\Version=ES64L-G16  
RevC.01\State=1-A\HF=-654.9777681\RMSD=5.248e-09\Dipole=-0.6020119,0.0  
146908,-0.203206\Quadrupole=0.7468128,0.3364833,-1.0832961,-5.5915777,  
-0.8709648,-0.5463649\PG=C01 [X(C15H14O1)]\@

### 1ae

1\1\GINC-A06R04N08\SP\RM06\def2TZVPP\C19H22O1\ACJSGGHI7X\20-Apr-2023\  
\\#p scrf=(iefpcm,smd,solvent=Acetonitrile) M06 def2tzvpp\\1\\0,1\C,0,  
1.835182,0.306781,-0.90498\C,0,1.840681,0.655518,0.455081\C,0,3.067367  
,0.621689,1.136517\C,0,4.235391,0.228577,0.493318\C,0,4.208632,-0.1363  
36,-0.852137\C,0,3.00344,-0.092337,-1.548385\H,0,0.895612,0.345024,-1.  
465867\H,0,3.109458,0.931355,2.185096\H,0,5.17975,0.217409,1.045522\H,  
0,2.970679,-0.366769,-2.606889\C,0,0.582801,1.034856,1.145141\C,0,-0.5  
24713,1.584796,0.308103\C,0,-1.761994,0.932087,0.138445\C,0,-0.308849,  
2.816211,-0.322838\C,0,-2.743248,1.543872,-0.648217\C,0,-1.29476,3.416  
104,-1.097837\H,0,0.660963,3.30843,-0.189357\C,0,-2.519099,2.773961,-1  
.258422\H,0,-3.699569,1.031577,-0.770996\H,0,-1.106308,4.383069,-1.573  
113\H,0,-3.306636,3.231237,-1.864796\C,0,0.431243,0.928275,2.474981\C,  
0,-2.0339,-0.439294,0.72022\O,0,-3.409253,-0.716638,0.588338\H,0,-3.59  
1006,-1.544243,1.043913\H,0,-0.493034,1.257457,2.960096\H,0,5.128212,-  
0.442881,-1.358812\C,0,-1.189371,-1.506763,0.030015\H,0,-1.362375,-1.4  
22411,-1.059981\H,0,-0.120539,-1.280876,0.198217\H,0,1.211275,0.512611  
,3.120083\C,0,-1.475721,-2.921239,0.507812\H,0,-2.466653,-3.246173,0.1  
32597\H,0,-1.545561,-2.924744,1.6143\C,0,-0.423866,-3.93407,0.07542\H,  
0,0.536839,-3.683697,0.564347\H,0,-0.703952,-4.930679,0.461072\C,0,-0.  
22247,-4.003611,-1.427424\H,0,0.455218,-4.824561,-1.708845\H,0,-1.1794  
95,-4.167832,-1.953146\H,0,0.215328,-3.07249,-1.824904\H,0,-1.754663,-  
0.432185,1.795874\\Version=ES64L-G16RevC.01\State=1-A\HF=-812.1761886\  
RMSD=2.532e-09\Dipole=0.5582958,-0.7465115,0.3859963\Quadrupole=-0.296  
0604,-1.1493477,1.4454081,3.0067173,-0.183406,-2.9030182\PG=C01 [X(C19  
H22O1)]\\@

### Int-1ae

1\1\GINC-A06R04N08\SP\UM06\def2TZVPP\C19H22O1 (3) \ACJSGGHI7X\20-Apr-202  
3\0\\#p scrf=(iefpcm,smd,solvent=Acetonitrile) M06 def2tzvpp\\int1\\0,  
3\C,0,2.427092,0.022444,-0.971995\C,0,2.093337,-0.118586,0.399362\C,0,

2.979438,-0.878293,1.204052\C,0,4.139486,-1.428607,0.681126\C,0,4.4543  
51,-1.263011,-0.669713\C,0,3.583789,-0.540536,-1.489827\H,0,1.745161,0  
.561527,-1.636061\H,0,2.740068,-1.018069,2.264065\H,0,4.809271,-1.9976  
3,1.332934\H,0,3.808625,-0.423286,-2.554268\C,0,0.874159,0.411215,0.95  
9505\C,0,0.104913,1.47175,0.291966\C,0,-1.312213,1.481581,0.219447\C,0  
,0.803335,2.568882,-0.252184\C,0,-1.959745,2.559939,-0.383732\C,0,0.14  
3453,3.6362,-0.846267\H,0,1.894429,2.587267,-0.169118\C,0,-1.247009,3.  
632283,-0.914362\H,0,-3.050345,2.542947,-0.431797\H,0,0.717738,4.47782  
, -1.244483\H,0,-1.781486,4.466603,-1.377969\C,0,0.44624,-0.070077,2.27  
8145\C,0,-2.133033,0.315531,0.714378\O,0,-3.496701,0.665862,0.677454\H  
,0,-3.997638,-0.041049,1.095444\H,0,0.697984,0.487398,3.190667\H,0,5.3  
66265,-1.703014,-1.083118\C,0,-1.874838,-0.943036,-0.11275\H,0,-2.1704  
58,-0.712956,-1.153622\H,0,-0.787784,-1.153263,-0.138206\H,0,0.035839,  
-1.079498,2.41875\C,0,-2.61377,-2.167472,0.403316\H,0,-3.705714,-2.028  
046,0.269093\H,0,-2.446658,-2.252859,1.496102\C,0,-2.202967,-3.470278,  
-0.268491\H,0,-1.127363,-3.648585,-0.077811\H,0,-2.733902,-4.307782,0.  
218433\C,0,-2.469322,-3.499115,-1.762297\H,0,-2.246131,-4.486187,-2.19  
6178\H,0,-3.526868,-3.271603,-1.982912\H,0,-1.856203,-2.761045,-2.3048  
28\H,0,-1.831394,0.10953,1.767183\\Version=ES64L-G16RevC.01\State=3-A\  
HF=-812.0951292\S2=2.035738\S2-1=0.\S2A=2.000772\RMSD=8.593e-09\Dipole  
=0.120643,-0.9373114,0.4547608\Quadrupole=1.3771684,-2.2635031,0.88633  
47,3.2906246,-2.6115138,-4.8141817\PG=C01 [X(C19H22O1)]\@

### Ts-1ae

1\1\GINC-A01R08N02\SP\UM06\def2TZVPP\C19H22O1(3)\ACJSGGHI7X\20-Apr-202  
3\0\#p scrf=(iefpcm,smd,solvent=Acetonitrile) M06 def2tzvpp\ts1\0,3  
\C,0,2.643654,-0.233877,-1.011667\C,0,2.177579,-0.390072,0.316593\C,0,  
2.958933,-1.191293,1.182851\C,0,4.146869,-1.769257,0.758616\C,0,4.5928  
38,-1.589346,-0.552007\C,0,3.826575,-0.82363,-1.433514\H,0,2.040033,0.  
332875,-1.726619\H,0,2.624331,-1.334281,2.215353\H,0,4.73622,-2.368724

,1.459129\H,0,4.152503,-0.694792,-2.470166\C,0,0.926857,0.178209,0.772  
654\C,0,0.326029,1.356935,0.17069\C,0,-1.082182,1.559669,0.23363\C,0,1  
.107371,2.390647,-0.395061\C,0,-1.645915,2.751955,-0.219013\C,0,0.5311  
94,3.56313,-0.858794\H,0,2.195688,2.282429,-0.414335\C,0,-0.850873,3.7  
51823,-0.771052\H,0,-2.729197,2.87844,-0.137099\H,0,1.16765,4.350852,-  
1.272771\H,0,-1.305508,4.679656,-1.130095\C,0,0.231502,-0.426766,1.932  
256\C,0,-1.939289,0.46469,0.754685\O,0,-3.093504,0.957769,1.336446\H,0  
,-3.690484,0.22181,1.513982\H,0,-1.121801,-0.05385,1.604373\H,0,5.5260  
33,-2.050653,-0.88743\C,0,-2.175158,-0.67757,-0.215448\H,0,-2.731014,-  
0.277722,-1.08739\H,0,-1.193001,-1.010082,-0.602804\H,0,0.227489,-1.52  
474,1.998719\C,0,-2.907352,-1.864356,0.394985\H,0,-3.955297,-1.584208,  
0.633047\H,0,-2.4302,-2.119877,1.360906\C,0,-2.935914,-3.098661,-0.495  
864\H,0,-1.896038,-3.428801,-0.680244\H,0,-3.416472,-3.925942,0.055941  
\C,0,-3.649576,-2.886516,-1.818254\H,0,-3.727415,-3.822861,-2.392144\H  
,0,-4.675142,-2.508476,-1.662308\H,0,-3.126039,-2.157731,-2.45852\H,0,  
0.376827,0.060252,2.91118\\Version=ES64L-G16RevC.01\State=3-A\HF=-812.  
0799214\S2=2.03387\S2-1=0.\S2A=2.000727\RMSD=2.313e-09\Dipole=-0.45281  
, -0.9657201, -0.074947\Quadrupole=4.5229354, -2.505937, -2.0169984, 2.6331  
815, -1.9224132, -5.4399683\PG=C01 [X(C19H22O1)]\@

## Int-2ae

1\1\GINC-A06R04N08\SP\UM06\def2TZVPP\C19H22O1(3)\ACJSGGHI7X\20-Apr-202  
3\0\#p scrf=(iefpcm,smd,solvent=Acetonitrile) M06 def2tzvpp\int2\0,  
3\C,0,1.167451,1.934498,-0.9726\C,0,1.255512,1.336154,0.313385\C,0,2.5  
39269,1.294768,0.920138\C,0,3.652067,1.82484,0.284033\C,0,3.538772,2.4  
10444,-0.979439\C,0,2.286469,2.456953,-1.600265\H,0,0.193661,1.973886,  
-1.471163\H,0,2.655395,0.849714,1.912709\H,0,4.626418,1.784408,0.78070  
7\H,0,2.186146,2.908609,-2.591955\C,0,0.108127,0.767224,0.946714\C,0,-  
1.255132,0.951297,0.393012\C,0,-2.034409,-0.118906,-0.164739\C,0,-1.83  
525,2.211737,0.536327\C,0,-3.393747,0.164135,-0.486999\C,0,-3.159951,2

.470475,0.179639\H,0,-1.218514,3.012902,0.960078\C,0,-3.938254,1.42428  
2,-0.322038\H,0,-4.00255,-0.642085,-0.901453\H,0,-3.57924,3.472685,0.3  
03788\H,0,-4.982816,1.599334,-0.59747\C,0,0.217057,0.063894,2.261288\C  
,0,-1.53962,-1.424883,-0.426967\O,0,-2.474204,-2.350647,-0.780221\H,0,  
-2.031845,-3.148753,-1.090745\H,0,-0.721743,-0.455102,2.510187\H,0,4.4  
19195,2.826987,-1.47685\C,0,-0.129519,-1.899172,-0.48479\H,0,0.058724,  
-2.262386,-1.519041\H,0,0.56949,-1.060321,-0.347128\H,0,1.036898,-0.67  
8263,2.282282\C,0,0.208408,-3.015329,0.507731\H,0,-0.386343,-3.923344,  
0.280713\H,0,-0.113528,-2.700076,1.516511\C,0,1.686339,-3.376453,0.528  
074\H,0,2.269513,-2.477969,0.811332\H,0,1.86252,-4.112102,1.332935\C,0  
,2.20785,-3.926928,-0.786775\H,0,3.25263,-4.263303,-0.70059\H,0,1.6100  
3,-4.7929,-1.121752\H,0,2.179401,-3.174834,-1.592359\H,0,0.421554,0.77  
3909,3.086663\\Version=ES64L-G16RevC.01\State=3-A\HF=-812.127374\S2=2.  
05823\S2-1=0.\S2A=2.002117\RMSD=4.784e-09\Dipole=0.8206807,-1.1920668,  
0.023684\Quadrupole=-3.9737212,4.4967179,-0.5229968,0.1286613,2.451882  
5,1.0547201\PG=C01 [X(C19H22O1)]\@

### Int-3ae

1\1\GINC-A06R05N04\SP\RM06\def2TZVPP\C19H22O1\ACJSGGHI7X\20-Apr-2023\0  
\#p scrf=(iefpcm,smd,solvent=Acetonitrile) M06 def2tzvpp\\int3\\0,1\C  
,0,-2.408007,0.799282,-1.060288\C,0,-2.113884,0.466493,0.271806\C,0,-3  
.107654,0.690289,1.236652\C,0,-4.350918,1.205512,0.881794\C,0,-4.62740  
6,1.524369,-0.446427\C,0,-3.648429,1.319562,-1.416836\H,0,-1.636135,0.  
64726,-1.823153\H,0,-2.910501,0.433229,2.282789\H,0,-5.114068,1.356491  
,1.651294\H,0,-3.850022,1.573874,-2.461826\C,0,-0.772104,-0.049794,0.6  
35641\C,0,-0.251069,-1.174242,0.038784\C,0,1.153067,-1.622048,0.170275  
\C,0,-1.122671,-2.119772,-0.648247\C,0,1.391576,-3.05677,0.220126\C,0,  
-0.790696,-3.429472,-0.758834\H,0,-2.116746,-1.787889,-0.959355\C,0,0.  
459888,-3.92435,-0.239986\H,0,2.370355,-3.410187,0.553231\H,0,-1.50378  
6,-4.132559,-1.200267\H,0,0.661727,-4.999424,-0.250289\C,0,-0.080231,0  
.707372,1.725048\C,0,2.235193,-0.791025,0.050562\O,0,3.469177,-1.33870

2,0.186253\H,0,4.141118,-0.673013,0.002844\H,0,-0.77187,0.878611,2.568  
004\H,0,0.800012,0.167751,2.107169\H,0,-5.602906,1.934062,-0.723893\C,  
0,2.241483,0.638458,-0.379619\H,0,2.730304,0.661432,-1.376659\H,0,1.21  
0473,0.990167,-0.541136\H,0,0.247954,1.715894,1.408381\C,0,2.994356,1.  
587033,0.554758\H,0,4.071463,1.320101,0.578368\H,0,2.636643,1.445023,1.  
.589327\C,0,2.870793,3.052337,0.163341\H,0,1.805945,3.349664,0.217813\  
H,0,3.388224,3.665713,0.922041\C,0,3.421959,3.37465,-1.213522\H,0,3.40  
5165,4.456966,-1.413865\H,0,4.468951,3.038021,-1.313593\H,0,2.842792,2.  
.891121,-2.017422\\Version=ES64L-G16RevC.01\State=1-A\HF=-812.1479859\  
RMSD=4.589e-09\Dipole=0.9958096,1.4627865,-0.0895557\Quadrupole=9.2577  
205,-6.9633844,-2.2943361,3.03555,-0.2975995,0.6968731\PG=C01 [X(C19H2  
201)]\@

### Int-2ae'

1\1\GINC-A04R05N04\SP\UM06\def2TZVPP\C19H22O1(3)\ACJSGGHI7X\27-Apr-202  
3\0\#p scrf=(iefpcm,smd,solvent=Acetonitrile) M06 def2tzvpp\int2\0,  
3\C,0,2.33025,-0.434324,-1.195487\C,0,2.42199,-0.394246,0.221255\C,0,3  
.414855,-1.208844,0.826597\C,0,4.258923,-2.001313,0.063125\C,0,4.14907  
6,-2.023184,-1.329647\C,0,3.174995,-1.233281,-1.948741\H,0,1.568103,0.  
173926,-1.693136\H,0,3.525669,-1.206924,1.914875\H,0,5.018488,-2.61347  
9,0.559551\H,0,3.07533,-1.245689,-3.038641\C,0,1.539569,0.412833,0.999  
992\C,0,0.618848,1.377163,0.351722\C,0,-0.795593,1.151159,0.231933\C,0  
,1.154897,2.580524,-0.103916\C,0,-1.577851,2.199792,-0.334108\C,0,0.36  
6306,3.587815,-0.663765\H,0,2.237468,2.724847,-0.008995\C,0,-1.012416,  
3.38485,-0.767596\H,0,-2.65637,2.060089,-0.452625\H,0,0.823031,4.51801  
4,-1.012508\H,0,-1.652234,4.158763,-1.202206\C,0,1.550268,0.361301,2.4  
9261\C,0,-1.420359,-0.057177,0.626808\O,0,-0.632438,-1.108639,0.969496  
\H,0,-1.1856,-1.83638,1.277102\H,0,0.686633,0.90068,2.911267\H,0,4.816  
446,-2.650258,-1.927807\C,0,-2.881651,-0.339138,0.544809\H,0,-3.150719  
, -0.999604,1.394952\H,0,-3.471999,0.580481,0.698857\H,0,1.514816,-0.67

6873,2.867963\C,0,-3.292889,-1.002775,-0.773056\H,0,-2.704249,-1.932514,-0.902674\H,0,-2.985461,-0.34195,-1.603696\C,0,-4.778541,-1.312502,-0.876781\H,0,-5.352103,-0.371751,-0.769963\H,0,-4.994162,-1.674005,-1.897757\C,0,-5.27144,-2.331902,0.134354\H,0,-6.327454,-2.594225,-0.033572\H,0,-4.687278,-3.266845,0.073583\H,0,-5.195821,-1.963335,1.171012\H,0,2.461544,0.825635,2.917814\\Version=ES64L-G16RevC.01\State=3-A\HF=-812.1271199\S2=2.059817\S2-1=0.\S2A=2.002239\RMSD=5.315e-09\Dipole=-1.4630714,-0.7559608,0.5279495\Quadrupole=3.0018264,-1.9995978,-1.0022286,0.8572898,0.6700958,-3.1270448\PG=C01 [X(C19H22O1)]\@

### Int-3ae'

1\1\GINC-A03R06N05\SP\RM06\def2TZVPP\C19H22O1\ACJSGGHI7X\27-Apr-2023\0\\#p scrf=(iefpcm,smd,solvent=Acetonitrile) M06 def2tzvpp\\int3\\0,1\C,0,-3.050875,-0.51685,1.248196\C,0,-2.774998,-0.463552,-0.127279\C,0,-3.858652,-0.528625,-1.016043\C,0,-5.166523,-0.623,-0.549941\C,0,-5.422739,-0.669244,0.819161\C,0,-4.357723,-0.617131,1.716511\H,0,-2.213076,-0.488031,1.953084\H,0,-3.672483,-0.480504,-2.094226\H,0,-5.99514,-0.657292,-1.263811\H,0,-4.545664,-0.66237,2.793602\C,0,-1.377208,-0.388322,-0.615516\C,0,-0.536257,0.626827,-0.22562\C,0,0.918575,0.646611,-0.505259\C,0,-1.063062,1.849183,0.364831\C,0,1.526075,1.949827,-0.732749\C,0,-0.384413,3.020901,0.298861\H,0,-2.080662,1.838929,0.764526\C,0,0.906148,3.087076,-0.337819\H,0,2.525903,2.008126,-1.173921\H,0,-0.843081,3.937862,0.680887\H,0,1.389302,4.057485,-0.484332\C,0,-0.978639,-1.453549,-1.582319\C,0,1.725938,-0.445352,-0.331575\O,0,1.203756,-1.614758,0.106405\H,0,1.916816,-2.243638,0.265661\H,0,-1.811692,-1.689481,-2.264476\H,0,-0.104116,-1.157904,-2.183766\H,0,-6.450254,-0.748549,1.185943\C,0,3.214961,-0.447844,-0.483872\H,0,3.511326,-1.428354,-0.907357\H,0,3.542654,0.299648,-1.224406\H,0,-0.711746,-2.394077,-1.068222\C,0,3.940453,-0.204775,0.840544\H,0,3.610258,-0.959568,1.582365\H,0,3.604546,0.768642,1.240648\C,0,5.457224,-0.228783,0.72842\H,0,5.777692,0.546



971,0.006994\H,0,5.887694,0.076043,1.698497\C,0,6.028719,-1.575372,0.3  
2297\H,0,7.129509,-1.572344,0.340956\H,0,5.69209,-2.37333,1.007928\H,0  
,5.728051,-1.868367,-0.696829\\Version=ES64L-G16RevC.01\State=1-A\HF=-  
812.1494082\RMSD=4.896e-09\Dipole=1.6405847,-0.9598534,-0.0137092\Quad  
rupole=9.0694208,-4.6950634,-4.3743575,-3.3635694,-1.0406927,0.5107026  
\PG=C01 [X(C19H22O1)]\@

## Ts-2ae

1\1\GINC-A06R05N04\SP\RM06\def2TZVPP\C19H22O1\ACJSGGHI7X\20-Apr-2023\0  
\#p scrf=(iefpcm,smd,solvent=Acetonitrile) M06 def2tzvpp\ts2\0,1\C,  
0,-2.575512,-0.441713,1.248822\C,0,-2.526379,-0.444149,-0.160838\C,0,-  
3.68333,-0.872872,-0.836637\C,0,-4.831902,-1.248368,-0.143953\C,0,-4.8  
6483,-1.214186,1.247081\C,0,-3.722511,-0.809414,1.93939\H,0,-1.67747,-  
0.162037,1.810706\H,0,-3.6944,-0.908455,-1.929322\H,0,-5.715157,-1.570  
79,-0.704188\H,0,-3.721269,-0.795634,3.033808\C,0,-1.282475,-0.090977,  
-0.869756\C,0,-0.469907,0.995386,-0.397039\C,0,0.962097,1.007204,-0.62  
8446\C,0,-1.000046,2.092954,0.340746\C,0,1.714268,2.183848,-0.327316\C  
,0,-0.240416,3.197729,0.635\H,0,-2.066466,2.086655,0.583595\C,0,1.1289  
75,3.264207,0.274032\H,0,2.780384,2.216015,-0.569954\H,0,-0.711016,4.0  
57725,1.121743\H,0,1.710363,4.165358,0.485395\C,0,-1.245508,-0.369691,  
-2.364283\C,0,1.615594,-0.241307,-0.785281\O,0,0.945777,-1.328802,-0.9  
34188\H,0,-0.116927,-1.057905,-0.739072\H,0,-2.070991,0.157735,-2.8774  
8\H,0,-0.313224,-0.012107,-2.824293\H,0,-5.767089,-1.510765,1.789444\C  
,0,3.083841,-0.436932,-0.58404\H,0,3.382645,-1.298001,-1.204722\H,0,3.  
655337,0.436275,-0.940085\H,0,-1.346638,-1.443038,-2.604319\C,0,3.4119  
63,-0.712339,0.884315\H,0,2.823842,-1.590915,1.211116\H,0,3.057067,0.1  
38682,1.493748\C,0,4.891379,-0.95189,1.145743\H,0,5.464164,-0.055003,0  
.840813\H,0,5.042538,-1.040216,2.236167\C,0,5.452992,-2.181582,0.45598  
1\H,0,6.497399,-2.369479,0.749266\H,0,4.869597,-3.082532,0.712452\H,0,  
5.441348,-2.086624,-0.642451\\Version=ES64L-G16RevC.01\State=1-A\HF=-8

12.1401318\RMSD=5.090e-09\Dipole=1.6191664,0.7558516,0.1218337\Quadrupole=4.4951744,-3.3204001,-1.1747744,1.7214986,-0.0475373,1.3803387\PG=C01 [X(C19H22O1)]\@

### Ts-3ae

1\1\GINC-A06R04N08\SP\RM06\def2TZVPP\C19H22O1\ACJSGGHI7X\20-Apr-2023\0  
\#p scrf=(iefpcm,smd,solvent=Acetonitrile) M06 def2tzvpp\ts3\0,1\C,  
0,-1.281701,-1.516472,-0.947028\C,0,-1.011159,-1.273428,0.420154\C,0,-  
2.081091,-1.459098,1.324589\C,0,-3.3364,-1.865992,0.887743\C,0,-3.5742  
81,-2.110083,-0.464311\C,0,-2.533082,-1.935388,-1.377924\H,0,-0.485566  
, -1.359011,-1.682927\H,0,-1.924215,-1.283079,2.392196\H,0,-4.142324,-1  
.999522,1.616122\H,0,-2.703959,-2.117514,-2.443472\C,0,0.282293,-0.771  
056,0.850416\C,0,1.44946,-0.876857,0.004102\C,0,2.187704,0.328248,0.03  
8322\C,0,1.983508,-1.980383,-0.691665\C,0,3.56457,0.352975,-0.267801\C  
,0,3.304338,-1.917331,-1.103474\H,0,1.40742,-2.905161,-0.802982\C,0,4.  
102994,-0.776434,-0.854234\H,0,4.159703,1.258371,-0.114786\H,0,3.76114  
4,-2.788941,-1.582703\H,0,5.154134,-0.784306,-1.158034\C,0,0.494041,-0  
.537583,2.326029\C,0,1.331662,1.417584,0.37759\O,0,1.853715,2.363743,1  
.176699\H,0,1.308924,3.163217,1.152256\H,0,0.336508,-1.475933,2.89633\  
H,0,1.518149,-0.199871,2.539805\H,0,-4.562994,-2.430478,-0.804664\C,0,  
0.125134,1.827106,-0.404539\H,0,0.448442,2.656271,-1.077135\H,0,-0.180  
301,1.003214,-1.067501\H,0,-0.195362,0.207523,2.765408\C,0,-1.070082,2  
.290963,0.425275\H,0,-0.853272,3.266278,0.91079\H,0,-1.230062,1.568088  
,1.244104\C,0,-2.351869,2.416718,-0.385345\H,0,-2.618794,1.414334,-0.7  
72719\H,0,-3.173987,2.699325,0.295763\C,0,-2.270292,3.412244,-1.527766  
\H,0,-3.243669,3.538309,-2.026663\H,0,-1.95209,4.407917,-1.170773\H,0,  
-1.55205,3.09663,-2.302807\\Version=ES64L-G16RevC.01\State=1-A\HF=-812  
.1238881\RMSD=6.713e-09\Dipole=-0.2676375,1.6008299,-0.1584702\Quadrupole=-2.2848997,4.4126323,-2.1277326,0.9249189,-2.4212397,3.0707421\PG=C01 [X(C19H22O1)]\@

### Ts-3ae'

```
1\1\GINC-B2146\SP\RM06\def2TZVPP\C19H22O1\ROOT\25-Jul-2023\0\#\#p scrf=
(iefpcm,smd,solvent=Acetonitrile) M06 def2tzvpp\ts3\0,1\C,0,-1.12197
3,-2.136535,0.904223\C,0,0.056355,-1.403647,0.643071\C,0,1.061947,-2.0
7602,-0.096658\C,0,0.870409,-3.363657,-0.582081\C,0,-0.319499,-4.05335
1,-0.340613\C,0,-1.30601,-3.426689,0.416762\H,0,-1.9236,-1.67634,1.490
738\H,0,2.030593,-1.58691,-0.250681\H,0,1.679675,-3.849757,-1.137201\H
,0,-2.242411,-3.95022,0.63451\C,0,0.2336,-0.056505,1.19172\C,0,1.33169
6,0.767659,0.770923\C,0,1.341811,0.912895,-0.63415\C,0,2.397391,1.3176
73,1.514411\C,0,2.52497,1.228805,-1.330595\C,0,3.522656,1.739415,0.827
764\H,0,2.38387,1.311236,2.609581\C,0,3.608313,1.652449,-0.581834\H,0,
2.555441,1.233965,-2.42572\H,0,4.388061,2.107742,1.387451\H,0,4.528202
,1.968751,-1.082199\C,0,-0.514152,0.295472,2.44098\C,0,0.029848,0.6954
76,-1.165788\H,0,-1.559584,0.590143,2.219359\H,0,-0.575226,-0.539875,3
.161599\H,0,-0.464608,-5.068093,-0.72062\C,0,-1.143366,1.572886,-0.886
41\H,0,-0.941334,2.15229,0.028311\H,0,-1.186267,2.314854,-1.716989\H,0
,-0.057621,1.163141,2.944086\C,0,-2.485865,0.856104,-0.827274\H,0,-2.4
6586,0.113395,-0.008053\H,0,-2.61114,0.271347,-1.754571\C,0,-3.665559,
1.799013,-0.643758\H,0,-3.649361,2.562407,-1.445605\H,0,-4.601692,1.23
3228,-0.79553\C,0,-3.705576,2.478148,0.713323\H,0,-3.735493,1.732559,1
.527523\H,0,-2.823056,3.116509,0.88798\H,0,-4.593284,3.120255,0.824735
\O,0,-0.125596,-0.048537,-2.262376\H,0,0.567477,-0.729884,-2.283787\Ver
sion=ES64L-G16RevA.03\State=1-A\HF=-812.1233682\RMSD=5.544e-09\Dipol
e=0.0870087,0.8088174,-0.3915484\Quadrupole=3.5397944,-4.4041144,0.864
32,0.4886119,-3.8842012,2.7806762\PG=C01 [X(C19H22O1)]\#@
```

### Ts-4

```
1\1\GINC-A01R03N03\SP\UM06\def2TZVPP\C19H22O1(3)\ACJSGGHI7X\27-Apr-202
3\0\#\#p scrf=(iefpcm,smd,solvent=Acetonitrile) M06 def2tzvpp\ts2\0,3
\C,0,-0.820594,-1.544977,-1.014996\C,0,-0.711134,-1.479339,0.401151\C,
```

0,-1.8555,-1.858813,1.153401\C,0,-3.024706,-2.266167,0.529563\C,0,-3.1  
07678,-2.319161,-0.864793\C,0,-1.993617,-1.956901,-1.628148\H,0,0.0390  
37,-1.25672,-1.628648\H,0,-1.816207,-1.831067,2.246181\H,0,-3.888362,-  
2.551752,1.137966\H,0,-2.045321,-1.995155,-2.720599\C,0,0.476163,-1.00  
489,1.038718\C,0,1.673668,-0.672541,0.231968\C,0,2.001083,0.672972,-0.  
052276\C,0,2.484201,-1.695719,-0.274463\C,0,3.13308,0.941579,-0.831199  
\C,0,3.609968,-1.407979,-1.04203\H,0,2.212379,-2.736002,-0.06249\C,0,3  
.936828,-0.08409,-1.322389\H,0,3.374511,1.987004,-1.051486\H,0,4.23134  
2,-2.222855,-1.425364\H,0,4.81762,0.151141,-1.926953\C,0,0.564329,-0.8  
55656,2.522978\C,0,1.131924,1.780372,0.397661\O,0,1.270264,2.119635,1.  
718733\H,0,0.596397,2.770099,1.950256\H,0,1.474018,-0.309881,2.809522\  
H,0,-4.031943,-2.641984,-1.352157\C,0,-0.107955,2.18439,-0.327419\H,0,  
-0.049869,3.24081,-0.672711\H,0,-0.16872,1.580641,-1.252622\H,0,-0.296  
536,-0.303358,2.942071\C,0,-1.401318,1.998605,0.479592\H,0,-1.503175,2  
.814043,1.226077\H,0,-1.332389,1.059515,1.056787\C,0,-2.655774,1.95681  
2,-0.379511\H,0,-2.590674,1.076694,-1.049041\H,0,-3.526909,1.763839,0.  
272437\C,0,-2.89385,3.215518,-1.193035\H,0,-3.853497,3.17731,-1.731865  
\H,0,-2.913464,4.111524,-0.5476\H,0,-2.1067,3.375014,-1.948689\H,0,0.5  
81641,-1.840037,3.030419\\Version=ES64L-G16RevC.01\State=3-A\HF=-812.1  
076093\S2=2.036706\S2-1=0.\S2A=2.000714\RMSD=5.879e-09\Dipole=-0.61584  
04,0.344268,0.0236101\Quadrupole=-1.1321345,0.6673362,0.4647983,-1.948  
6437,-5.1509569,0.8596968\PG=C01 [X(C19H22O1)]\@

## Ts-5

1\1\GINC-A04R05N04\SP\RM06\def2TZVPP\C19H22O1\ACJSGGHI7X\27-Apr-2023\0  
\#p scrf=(iefpcm,smd,solvent=Acetonitrile) M06 def2tzvpp\\ts4\\0,1\C,  
0,3.139286,-0.651178,-1.188069\C,0,2.366791,-0.747871,-0.019405\C,0,2.  
975107,-1.303695,1.117305\C,0,4.300442,-1.727802,1.094906\C,0,5.054316  
, -1.612855,-0.071896\C,0,4.465917,-1.073803,-1.214245\H,0,2.677126,-0.  
243793,-2.094125\H,0,2.391411,-1.387867,2.04106\H,0,4.751936,-2.14654,

1.999732\H,0,5.043474,-0.989223,-2.140127\C,0,0.936731,-0.35138,0.0105  
95\C,0,0.522126,0.96433,-0.175444\C,0,-0.879674,1.413433,-0.095099\C,0  
,1.494894,1.999774,-0.45623\C,0,-1.0622,2.824556,0.132054\C,0,1.206377  
,3.329659,-0.430267\H,0,2.51826,1.687986,-0.672894\C,0,-0.101863,3.770  
794,-0.100079\H,0,-2.073163,3.16356,0.392193\H,0,1.994104,4.058147,-0.  
646405\H,0,-0.343306,4.836101,-0.055714\C,0,-0.020863,-1.45925,0.26044  
5\C,0,-1.979918,0.710776,0.498374\O,0,-2.099385,0.781524,1.825021\H,0,  
-2.96884,0.462506,2.118879\H,0,0.480745,-2.348644,0.672366\H,0,-0.8118  
67,-1.144763,0.969317\H,0,6.096366,-1.945262,-0.091612\C,0,-2.875972,-  
0.198464,-0.25875\H,0,-3.591306,0.434561,-0.826226\H,0,-2.255299,-0.64  
6495,-1.063961\H,0,-0.561714,-1.798614,-0.651166\C,0,-3.630942,-1.2649  
4,0.520995\H,0,-4.361837,-0.787724,1.208208\H,0,-2.920517,-1.820743,1.  
160955\C,0,-4.37799,-2.25008,-0.368117\H,0,-3.64258,-2.772188,-1.00923  
7\H,0,-4.822927,-3.033455,0.269957\C,0,-5.458239,-1.618357,-1.226417\H  
,0,-6.032083,-2.378934,-1.777552\H,0,-6.17527,-1.047482,-0.610904\H,0,  
-5.043601,-0.92522,-1.976845\\Version=ES64L-G16RevC.01\State=1-A\HF=-8  
12.0869639\RMSD=6.283e-09\Dipole=-3.2111566,-1.0589904,0.5560642\Quadr  
upole=13.3669958,-9.1047513,-4.2622445,0.4944209,-5.8718353,-1.5180145  
\PG=C01 [X(C19H22O1)]\@

## 2ae

1\1\GINC-A06R03N06\SP\RM06\def2TZVPP\C19H22O1\ACJSGGHI7X\20-Apr-2023\0  
\#p scrf=(iefpcm,smd,solvent=Acetonitrile) M06 def2tzvpp\2\0,1\C,0,  
-2.498644,-1.027074,1.176125\C,0,-2.55757,-0.686141,-0.182326\C,0,-3.8  
13316,-0.62546,-0.790725\C,0,-4.975014,-0.892271,-0.063591\C,0,-4.9001  
2,-1.226346,1.284292\C,0,-3.651704,-1.294009,1.90411\H,0,-1.518673,-1.  
078893,1.665931\H,0,-3.897381,-0.367301,-1.850441\H,0,-5.947998,-0.838  
724,-0.561392\H,0,-3.578549,-1.560262,2.962877\C,0,-1.260111,-0.408608  
, -0.914384\C,0,-0.571191,0.834773,-0.372209\C,0,0.824982,0.942602,-0.1  
64893\C,0,-1.366981,1.951612,-0.088471\C,0,1.348792,2.144862,0.341527\

C,0,-0.828802,3.143491,0.379893\H,0,-2.449428,1.87299,-0.237023\C,0,0.542122,3.242674,0.602549\H,0,2.423975,2.232669,0.51637\H,0,-1.48466,3.995988,0.579251\H,0,0.981159,4.170694,0.978619\C,0,-1.399401,-0.291364,-2.427117\C,0,1.769916,-0.175372,-0.480023\O,0,1.491561,-1.045928,-1.28047\H,0,-0.601036,-1.27047,-0.723523\H,0,-1.993473,0.594061,-2.712661\H,0,-0.403439,-0.19469,-2.883065\H,0,-5.810722,-1.4368,1.852614\C,0,3.107791,-0.200322,0.230255\H,0,3.692245,0.671213,-0.122196\H,0,2.949303,-0.015467,1.310687\H,0,-1.882752,-1.1845,-2.855115\C,0,3.883055,-1.48406,0.004399\H,0,4.082246,-1.598738,-1.076613\H,0,3.237596,-2.340166,0.266864\C,0,5.185914,-1.554937,0.786875\H,0,4.968096,-1.482931,1.870097\H,0,5.629293,-2.556034,0.642986\C,0,6.201567,-0.495493,0.398036\H,0,7.162733,-0.641612,0.91514\H,0,6.403373,-0.518038,-0.687007\H,0,5.857888,0.523091,0.645429\\Version=ES64L-G16RevC.01\State=1-A\HF=-812.2020188\RMSD=8.616e-09\Dipole=0.3679855,1.0830318,0.8277685\Quadrupole=6.1165976,-2.3361761,-3.7804215,1.7250045,3.8880326,-1.6041\PG=C01 [X(C19H22O1)]\@

### 3

1\1\GINC-A04R06N02\SP\RM06\def2TZVPP\C19H22O1\ACJSGGHI7X\20-Apr-2023\0\\#p scrf=(iefpcm,smd,solvent=Acetonitrile) M06 def2tzvpp\\3\\0,1\C,0,1.757269,1.608839,1.09782\C,0,0.633799,1.279898,0.326305\C,0,0.657578,1.629717,-1.031283\C,0,1.76034,2.264344,-1.598218\C,0,2.872402,2.570996,-0.817956\C,0,2.863887,2.240385,0.535036\H,0,1.775007,1.369475,2.165408\H,0,-0.210212,1.399577,-1.658837\H,0,1.746327,2.525361,-2.660686\H,0,3.725545,2.482709,1.164365\C,0,-0.555968,0.557582,0.922658\C,0,-1.840736,0.618921,0.112771\C,0,-1.956609,-0.754655,-0.034305\C,0,-2.785773,1.498083,-0.396762\C,0,-3.031782,-1.351555,-0.674966\C,0,-3.87413,0.912416,-1.054689\H,0,-2.703696,2.585349,-0.298435\C,0,-3.996628,-0.476921,-1.187759\H,0,-3.136698,-2.435443,-0.780601\H,0,-4.656176,1.552687,-1.47498\H,0,-4.870889,-0.882118,-1.706712\C,0,-0.782606,0.891676,2.3

88788\C,0,-0.656222,-1.058666,0.668819\O,0,-0.860986,-1.824206,1.8224\  
H,0,-0.00395,-2.013041,2.223217\H,0,-0.849364,1.982468,2.53673\H,0,-1.  
712099,0.4288,2.749812\H,0,3.738421,3.071944,-1.259998\C,0,0.426728,-1  
.661611,-0.209063\H,0,0.037869,-2.61662,-0.610449\H,0,0.58724,-1.00588  
3,-1.083225\H,0,0.032555,0.511326,3.027958\C,0,1.747833,-1.887493,0.52  
0673\H,0,1.690044,-2.81869,1.120177\H,0,1.916888,-1.064029,1.241278\C,  
0,2.951003,-1.971204,-0.407012\H,0,3.05451,-1.003446,-0.935045\H,0,3.8  
68151,-2.079355,0.199162\C,0,2.865369,-3.105174,-1.411446\H,0,3.778318  
, -3.179072,-2.022628\H,0,2.725968,-4.076593,-0.905417\H,0,2.019606,-2.  
975223,-2.106772\\Version=ES64L-G16RevC.01\State=1-A\HF=-812.165864\RM  
SD=4.086e-09\Dipole=0.795331,0.0094218,-0.0918741\Quadrupole=1.0741753  
, -1.0659844,-0.008191,-1.4738655,6.1898066,-0.517029\PG=C01 [X(C19H22O  
1)]\@

3'

1\1\GINC-B2157\SP\RM06\def2TZVPP\C19H22O1\ROOT\24-Jul-2023\0\#\#p scrf=  
(iefpcm,smd,solvent=Acetonitrile) M06 def2tzvpp\\3\\0,1\C,0,1.287301,-  
2.207865,-0.018985\C,0,1.489476,-0.845473,0.235979\C,0,2.797433,-0.358  
968,0.229708\C,0,3.877062,-1.208541,-0.014673\C,0,3.662701,-2.559932,-  
0.263273\C,0,2.359015,-3.056566,-0.268436\H,0,0.26654,-2.604561,-0.040  
808\H,0,2.979883,0.70473,0.411541\H,0,4.894186,-0.805081,-0.012907\H,0  
,2.176581,-4.115919,-0.472752\C,0,0.305535,0.038613,0.556564\C,0,0.534  
831,1.539307,0.474581\C,0,-0.340551,1.725551,-0.584841\C,0,1.175511,2.  
601452,1.096341\C,0,-0.623698,2.978075,-1.10812\C,0,0.913669,3.872066,  
0.568053\H,0,1.849998,2.4761,1.950155\C,0,0.038604,4.056647,-0.50887\H  
,0,-1.322367,3.140209,-1.93584\H,0,1.399373,4.748155,1.009026\H,0,-0.1  
35669,5.071154,-0.880563\C,0,-0.306407,-0.371951,1.89279\C,0,-0.704081  
,0.254266,-0.679432\H,0,0.442026,-0.22254,2.689466\H,0,-1.187341,0.238  
946,2.149701\H,0,4.507814,-3.2269,-0.457494\C,0,-2.179914,-0.04255,-0.  
464922\H,0,-2.516569,0.457897,0.4597\H,0,-2.73882,0.464235,-1.281112\H

,0,-0.596163,-1.434658,1.915059\C,0,-2.541681,-1.51867,-0.461119\H,0,-  
1.956524,-2.041929,0.319715\H,0,-2.21572,-1.961954,-1.417797\C,0,-4.02  
1826,-1.788412,-0.23125\H,0,-4.614547,-1.261838,-1.004155\H,0,-4.21779  
, -2.863497,-0.391658\C,0,-4.508494,-1.389705,1.150929\H,0,-5.555952,-1  
.685846,1.317919\H,0,-3.900181,-1.869315,1.938169\H,0,-4.453269,-0.300  
708,1.315376\O,0,-0.215838,-0.398065,-1.824313\H,0,-0.6657,-0.026234,-  
2.592383\\Version=ES64L-G16RevA.03\State=1-A\HF=-812.1642831\RMSD=4.58  
5e-09\Dipole=-0.8670917,0.4403069,-0.0278347\Quadrupole=0.1276343,2.14  
34009,-2.2710352,1.0554737,4.8442982,-0.8001218\PG=C01 [X(C19H22O1)]\\  
@



## 9. References

- 1 C. Han, X. Feng and H. Du, Asymmetric Halocyclizations of 2-Vinylbenzyl Alcohols with Chiral FLPs, *Org. Lett.*, 2021, **23**, 7325–7329.
- 2 X. Fan, R. Liu, Y. Wei and M. Shi, Rh-Catalyzed Intramolecular Decarbonylative Cyclization of *Ortho* -Formyl Group Tethered Alkylidenecyclopropanes (ACPs) for the Construction of 2-Methylindenes, *Org. Chem. Front.*, 2019, **6**, 2667–2671.
- 3 R. Alabaster, I. Cottrell, D. Hands, G. Humphrey, D. Kennedy and S. Wright, Synthesis of 6-(3-Aryl-2-propenyl)-2,3-dihydro-5-hydroxybenzofuran Derivatives by Cross Coupling Reactions, *Synthesis*, 1989, **8**, 598–603.
- 4 J. Liu, T. Hao, L. Qian, M. Shi and Y. Wei, Construction of Benzocyclobutenes Enabled by Visible-Light-Induced Triplet Biradical Atom Transfer of Olefins, *Angew. Chem. Int. Ed.*, 2022, **61**, e202204515. DOI: [10.1002/anie.202204515](https://doi.org/10.1002/anie.202204515).
- 5 R. F. Salikov, K. P. Trainov, A. A. Levina, I. K. Belousova, M. G. Medvedev and Y. V. Tomilov, Synthesis of Branched Tryptamines via the Domino Cloke–Stevens/Grandberg Rearrangement, *J. Org. Chem.*, 2017, **82**, 790–795.
- 6 T. M. Ha, Q. Wang and J. Zhu, Copper-Catalysed Cyanoalkylative Cycloetherification of Alkenes to 1,3-Dihydroisobenzofurans: Development and Application to the Synthesis of Citalopram, *Chem. Commun.*, 2016, **52**, 11100–11103.
- 7 H. Konishi, T. Ueda, T. Muto and K. Manabe, Remarkable Improvement Achieved by Imidazole Derivatives in Ruthenium-Catalyzed Hydroesterification of Alkenes Using Formates, *Org. Lett.*, 2012, **14**, 4722–4725.
- 8 C. Hauguel, C. Tran, O. Provot, J. Bignon, V. Gandon and A. Hamze, Water-Facilitated Nitromethane-Mediated Cyclization of 2-(Phenylvinyl)Benzhydrols: Access to 1,3-Diphenyl-1H-indenes with Antitumor Activity, *Adv. Synth. Catal.*, 2022, **364**, 3004–3015
- 9 Q. Liu, Y. Chen, X. Zhang, K. N. Houk, Y. Liang and A. B. Smith, Type II Anion Relay Chemistry: Conformational Constraints To Achieve Effective [1,5]-Vinyl Brook Rearrangements, *J. Am. Chem. Soc.*, 2017, **139**, 8710–8717.
- 10 D. Parmar and M. Rueping, Mild and Metal-Free Oxy- and Amino-Fluorination for the Synthesis of Fluorinated Heterocycles, *Chem. Commun.*, 2014, **50**, 13928–13931.

- 11 Y. Huang, G. H. Chan and S. Chiba, Amide-Directed C–H Sodiation by a Sodium Hydride/Iodide Composite, *Angew. Chem. Int. Ed.*, 2017, **56**, 6544–6547.
- 12 W. Xu, J. H. Pek and N. Yoshikai, Imine-Directed Olefin Hydroarylation under Grignard-Free Conditions, *Adv. Synth. Catal.*, 2016, **358**, 2564–2568.
- 13 H. Sugiura, D. Sakai, H. Otani, K. Teranishi, Y. Takahira, R. Amemiya and M. Yamaguchi, Synthesis and Structure of Optically Active 1,12-Diethyl- and 1,12-Diisopropylbenzo[*c*]Phenanthrenes: An Isopropyl Group Can Be Smaller than a Methyl Group, *Chem. Lett.*, 2007, **36**, 72–73.
- 14 T. Takahashi, M. Yoshimura, H. Suzuka, T. Maegawa, Y. Sawama, Y. Monguchi and H. Sajiki, Chemoselective Hydrogenation Using Molecular Sieves-Supported Pd Catalysts: Pd/MS3A and Pd/MS5A, *Tetrahedron*, 2012, **68**, 8293–8299.
- 15 B. A. Suslick and T. D. Tilley, Olefin Hydroarylation Catalyzed by a Single-Component Cobalt(-I) Complex, *Org. Lett.*, 2021, **23**, 1495–1499.
- 16 W. Xu and N. Yoshikai, Cobalt-Catalyzed, N–H Imine-Directed Hydroarylation of Styrenes, *Org. Lett.*, 2018, **20**, 1392–1395.
- 17 G. E. M. Crisenza, N. G. McCreanor and J. F. Bower, Branch-Selective, Iridium-Catalyzed Hydroarylation of Monosubstituted Alkenes via a Cooperative Destabilization Strategy, *J. Am. Chem. Soc.*, 2014, **136**, 10258–10261.
- 18 Grimme, xtb 6.0; Mulliken Center for Theoretical Chemistry, University of Bonn, **2019**; available upon request via e-mail to [xtb@thch.uni-bonn.de](mailto:xtb@thch.uni-bonn.de).
